# Supplementary material for: Genome-scale reconstruction and in silico analysis of Aspergillus terreus metabolism
Source: Royal Society of Chemistry journal article supplement (doi:10.1039/c3mb70090a), 2013-04-05
Supplement: c3mb70090a.xlsx [file c3mb70090a.xlsx]

## Sheet: Biomass of iJL1454
Cellular Composition							References
Items	composition (% w/w)
Protein	32.8						(Lahoz et al., 1967; Lahoz, 1967)
DNA	0.8						(Pedersen et al., 1999)
RNA	5.3						(Pedersen et al., 1999)
Lipid	19						(Lahoz et al., 1967; Lahoz, 1967)
Glycogen	0.1						(Pedersen et al., 1999)
Cell wall components (chitin and glucan)	20						(Lahoz et al., 1967; Lahoz, 1967)
Ash content	15.2						(Lahoz et al., 1967; Lahoz, 1967)
Glycerol	0.7						(Pedersen et al., 1999)
D-mannitol	6.1						(Lahoz et al., 1967; Lahoz, 1967)
	100
Protein							(Birren B et al., 2005)
Amino Acid	Count (all ORFs)	Prevalence (%)	MW (g/mol)	P*MW (%)	by weight (%)	mmol/gDW
Alanine (A)	453953	8.74098	89.05	778.384	6.05258	0.222936
Arginine (R)	327091	6.29822	175.11	1102.88	8.57582	0.160634
Asparagine (N)	180969	3.4846	132.05	460.142	3.57799	0.0888738
Aspartic acid (D)	297559	5.72957	132.04	756.533	5.88267	0.146131
Cysteine (C)	67130	1.2926	121.02	156.431	1.21638	0.0329675
Glutamate (E)	312986	6.02662	146.05	880.188	6.8442	0.153707
Glutamine (Q)	206194	3.97032	146.07	579.944	4.50955	0.101262
Glycine (G)	356010	6.85506	75.03	514.335	3.99938	0.174836
Histidine (H)	128639	2.47698	155.07	384.105	2.98673	0.0631746
Isoleucine (I)	250167	4.81703	131.09	631.464	4.91016	0.122857
Leucine (L)	473293	9.11337	131.09	1194.67	9.28957	0.232434
Lysine (K)	229278	4.4148	147.11	649.462	5.05011	0.112598
Methionine (M)	113333	2.18225	149.05	325.265	2.52921	0.0556578
Phenylalanine (F)	194115	3.73773	165.08	617.025	4.79788	0.0953298
Proline (P)	319965	6.161	115.06	708.885	5.51217	0.157135
Serine (S)	420888	8.1043	105.04	851.276	6.61938	0.206698
Threonine (T)	305855	5.88931	119.06	701.182	5.45227	0.150205
Tryptophan (W)	77827	1.49858	204.09	305.845	2.3782	0.0382208
Tyrosine (Y)	149679	2.88211	181.07	521.863	4.05792	0.0735073
Valine (V)	328459	6.32456	117.08	740.479	5.75784	0.161306
	5193390	100	2736.31	12860.4	100	2.55047
DNA							(Birren B et al., 2005)
G+C content (%):	52
DNA	Prevalence (%)	MW (g/mol)	P*MW (%)	by weight (%)		mmol/gDW
dATP	24	487.001	11688	24.2111		0.00397718
dCTP	26	462.99	12037.7	24.9355		0.00430861
dGTP	26	502.996	13077.9	27.0902		0.00430861
dTTP	24	477.989	11471.7	23.7631		0.00397718
	100		48275.4	100
RNA							(Birren B et al., 2005)
RNA	Prevalence (%)	MW (g/mol)	P*MW (%)	by weight (%)		mmol/gDW
ATP	25.6	502.996	128.767	25.9176		0.0273091
CTP	19.6	478.985	93.881	18.896		0.0209085
GTP	28.6	518.991	148.431	29.8756		0.0305094
UTP	26.2	479.969	125.752	25.3108		0.0279491
	100		496.831	100
Lipids							(Pedersen et al., 1999)
Components	Content % (w/w)	MW (g/mol)	P*MW (%)	by weight (%)		mmol/gDCW
Triacylglycerol	31	954.96	296.038	35.6481		0.061678
Free fatty acids	5	301.31	15.0655	1.81415		0.031529
Phosphatidylethanolamine	14	782.5	109.55	13.1917		0.0339936
Phosphatidylcholine	35	834.8	292.18	35.1836		0.0796598
Phosphatidylserine	6	827.32	49.6392	5.97743		0.0137794
Phosphatidylamine	9	755.24	67.9716	8.18497		0.0226418
	100	4456.13	830.444	100		0.243282
Subclasses: lipid fatty acid							(Kumar et al., 2010)
lipids fatty acid	by weight (%)	Normalized % w/w	MW (g/mol)	Averaged MW (g/mol)		molar composition (%)
C160	14.9813	239.2	35.8352	13.7247		0.137222
C182	29.9625	263.2	78.8614	30.2035		0.30198
C181	37.4532	265.3	99.3633	38.0556		0.380487
C180	17.603	267.5	47.088	18.0345		0.180312
	267		261.1	100.018
Subclasses: triacylglycerol fatty acids							(Singh and Sood, 1973)
triacylglycerol fatty acids	by weight (%)	Normalized % w/w	MW (g/mol)	Averaged MW (g/mol)		molar composition (%)
C12:0	0.1	0.1	201.3	0.2013		0.000785577
C14:0	1.9	1.9	227.4	4.3206		0.0168612
C16:0	0.1	0.1	239.2	0.2392		0.000933482
C16:1	23.4	23.4	237.2	55.5048		0.216608
C18:0	0.3	0.3	267.5	0.8025		0.00313177
C18:1	14.1	14.1	265.3	37.4073		0.145983
C18:2	39.4	39.4	263.2	103.701		0.404694
C18:3	20.7	20.7	261.2	54.0684		0.211003
	100	100	1962.3	256.245		1
Subclasses: phospholipid fatty acids							(Birch et al., 1998)
phospholipid fatty acids	by weight (%)	Normalized % w/w	MW (g/mol)	Averaged MW (g/mol)		molar composition (%)
C160	9.4	20.9354	239.2	50.0775		0.195428
C183	3.3	7.34967	261.2	19.1973		0.0749179
C182	9.8	21.8263	263.2	57.4468		0.224187
C181	10.2	22.7171	265.3	60.2686		0.235199
C180	3.6	8.01782	267.5	21.4477		0.0836999
C120	8.6	19.1537	201.3	38.5563		0.150467
	44.9
Glycogen							(Pedersen et al., 1999)
Components	Content % (w/w) *	MW (g/mol)	P*MW (%)	by weight (%)		mmol/gDCW
Glycogen	100	666.6	666.6	100		0.00150015
	100	666.6	666.6	100
Cell Wall							(Pedersen et al., 1999)
Components	Content % (w/w) *	MW (g/mol)	P*MW (%)	% (mole)		mmol/gDCW
chitin	27	203.2	54.864	31.6772		0.265748
glucan	73	162.1	118.333	68.3228		0.900679
	100		173.197	100
Glycerol							(Pedersen et al., 1999)
Components	Content % (w/w)	MW (g/mol)	P*MW (%)	by weight (%)		mmol/gDCW
glycerol	100	92.1	92.1	100		0.0760043
D-mannitol							(Lahoz et al., 1967; Lahoz, 1967)
Components	Content % (w/w)	MW (g/mol)	P*MW (%)	by weight (%)		mmol/gDCW
D-mannitol	100	182.2	182.2	100		0.334797
Note:
Numbers that corresponding to the unit mmol/gDCW were used as the coefficients of the components in the biomass function.
Numbers that corresponding to the unit molar composition (%) were used as the coefficients of the components in the formation of the subclasses of lipid that defined in this model.
References:
Birch, M., Drucker, D. B., Riba, I., Gaskell, S. J. & Denning, D. W. (1998). Polar lipids of Aspergillus fumigatus, A. niger, A. nidulans, A. flavus and A. terreus. Medical Mycology, 36, 127-134.
Birren B, W., Lander E, S., Galagan J, E., Nusbaum, C. & Devon, K. (2005). Annotation of the Aspergillus terreus NIH2624 genome. EMBL/GenBank/DDBJ databases.
Kumar, A. K., Vatsyayan, P. & Goswami, P. (2010). Production of lipid and fatty acids during growth of Aspergillus terreus on hydrocarbon substrates. Applied Biochemistry and Biotechnology, 160, 1293-1300.
Lahoz, R., Reyes, F., Beltra, R. & Garcia-Tapia, C. (1967). The autolysis of Aspergillus terreus in a physiologically acid medium. Journal of General Microbiology, 49, 259-265.
Lahoz, R. (1967). Quantitative changes in the content of non-nitrogenous compounds during autolysis of Aspergillus terreus. Journal of General Microbiology, 46, 451-456.
Pedersen, H., Carlsen, M. & Nielsen, J. (1999). Identification of enzymes and quantification of metabolic fluxes in the wild type and in a recombinant Aspergillus oryzae strain. Applied and Environmental Microbiology, 65, 11-19.
Singh, J. & Sood, M. (1973). Component fatty acids of Aspergillus terreus fat. Journal of the American Oil Chemists' Society, 50, 485-486.
