# Supplementary material for: Genome-scale reconstruction and in silico analysis of Aspergillus terreus metabolism
Source: Royal Society of Chemistry journal article supplement (doi:10.1039/c3mb70090a), 2013-04-05
Supplement: c3mb70090a_2.xlsx [file c3mb70090a_2.xlsx]

## Sheet: reactions
Rxn name	Rxn description	Formula	Gene-reaction association	Subsystem	EC Number	References
r0001	L-amino-acid oxidase	ile[m] + h2o[m] + o2[m] <=> omval[m] + nh3[m] + h2o2[m]	(ATEG_01932) or (ATEG_07543)	AA:Alanine, aspartate and glutamate metabolism	1.4.3.2
r0002	L-amino-acid oxidase	h2o[m] + o2[m] + asp[m] -> h2o2[m] + nh3[m] + oa[m]	(ATEG_07543) or (ATEG_01932)	AA:Alanine, aspartate and glutamate metabolism	1.4.3.2
r0003	aspartate racemase	asp[c] -> dasp[c]	(ATEG_05888)	AA:Alanine, aspartate and glutamate metabolism
r0004	D-amino-acid oxidase	h2o[e] + o2[e] + dasp[e] -> h2o2[e] + nh3[e] + oa[e]	(ATEG_02494) or (ATEG_06132)	AA:Alanine, aspartate and glutamate metabolism	1.4.3.3
r0005	D-amino-acid oxidase	h2o[c] + o2[c] + dasp[c] -> h2o2[c] + nh3[c] + oa[c]	(ATEG_07717) or (ATEG_02494) or (ATEG_09513)	AA:Alanine, aspartate and glutamate metabolism	1.4.3.3
r0006	aspartate aminotransferase	akg[c] + asp[c] -> oa[c] + glu[c]	(ATEG_07168) or (ATEG_07203) or (ATEG_03935) or (ATEG_09029) or (ATEG_04402)	AA:Alanine, aspartate and glutamate metabolism	2.6.1.1
r0007	aspartate aminotransferase, mitchondrial	oa[m] + glu[m] -> asp[m] + akg[m]	(ATEG_00899) or (ATEG_07168) or (ATEG_03935) or (ATEG_09029) or (ATEG_04402)	AA:Alanine, aspartate and glutamate metabolism	2.6.1.1
r0008	Alanine transaminase	akg[c] + ala[c] <=> glu[c] + pyr[c]	(ATEG_05887)	AA:Alanine, aspartate and glutamate metabolism	2.6.1.2
r0009	Alanine transaminase	akg[m] + ala[m] <=> glu[m] + pyr[m]	(ATEG_05887)	AA:Alanine, aspartate and glutamate metabolism	2.6.1.2
r0010	Alanine-glyoxylate transaminase	ala[c] + glx[c] <=> pyr[c] + gly[c]	(ATEG_08570)	AA:Alanine, aspartate and glutamate metabolism	2.6.1.44
r0011	succinate-semialdehyde dehydrogenase	h2o[m] + succsal[m] + nadp[m] -> 2 h[m] + nadph[m] + succ[m]	(ATEG_05387)	AA:Alanine, aspartate and glutamate metabolism:Tyrosine metabolism;CM:Butanoate metabolism	1.2.1.16
r0012	succinate-semialdehyde dehydrogenase [NAD(P)+]	h2o[m] + succsal[m] + nad[m] -> 2 h[m] + succ[m] + nadh[m]	(ATEG_07083) or (ATEG_01761) or (ATEG_05387) or (ATEG_06215) or (ATEG_06399) or (ATEG_07908)	AA:Alanine, aspartate and glutamate metabolism:Tyrosine metabolism;CM:Butanoate metabolism	1.2.1.16
r0013	4-Aminobutyrate transaminase	akg[m] + bala[m] <=> glu[m] + oppa[m]	(ATEG_09355)	AA:Alanine, aspartate and glutamate metabolism;CM:Butanoate metabolism	2.6.1.19
r0014	4-Aminobutyrate transaminase	akg[m] + gaba[m] -> glu[m] + succsal[m]	(ATEG_09355)	AA:Alanine, aspartate and glutamate metabolism;CM:Butanoate metabolism	2.6.1.19
r0015	4-Aminobutyrate transaminase	pyr[m] + gaba[m] -> ala[m] + succsal[m]	(ATEG_09355)	AA:Alanine, aspartate and glutamate metabolism;CM:Butanoate metabolism	2.6.1.19	AsperCyc
r0016	Asparagine synthase	h2o[c] + asp[c] + gln[c] + atp[c] -> glu[c] + 2 h[c] + amp[c] + ppi[c] + asn[c]	(ATEG_03132) or (ATEG_05543) or (ATEG_05373)	AA:Alanine, aspartate and glutamate metabolism;EM:Nitrogen metabolism	6.3.5.4
r0017	L-asparaginase	h2o[c] + asn[c] -> nh3[c] + asp[c]	(ATEG_01943) or (ATEG_02114) or (ATEG_05928)	AA:Alanine, aspartate and glutamate metabolism;EM:Nitrogen metabolism;OA:CyanoAA	3.5.1.1
r0018	pyrroline-5-carboxylate reductase	2 h2o[c] + phc[c] + nad[c] -> h[c] + nadh[c] + ehglu[c]	(ATEG_07474) or (ATEG_01115) or (ATEG_06079)	AA:Arginine and proline metabolism	1.5.1.2
r0019	L-aspartate:2-oxoglutarate aminotransferase	akg[c] + ehglu[c] -> glu[c] + hakg[c]	(ATEG_07168) or (ATEG_07203) or (ATEG_03935) or (ATEG_09029)	AA:Arginine and proline metabolism	2.6.1.1
r0020	agmatine deiminase	h2o[c] + agmt[c] -> nh3[c] + ncapsc[c]	(ATEG_04938)	AA:Arginine and proline metabolism	3.5.3.12
r0021	aspartate aminotransferase	akg[c] + cys[c] -> glu[c] + mrpyr[c]	(ATEG_07168) or (ATEG_07203) or (ATEG_03935) or (ATEG_09029)	AA:Arginine and proline metabolism	2.6.1.1
r0022	aspartate aminotransferase	akg[c] + cyse[c] -> glu[c] + slpyr[c]	(ATEG_07168) or (ATEG_07203) or (ATEG_03935) or (ATEG_09029)	AA:Arginine and proline metabolism	2.6.1.1
r0023	hydroxyproline oxidase	hpro[c] + fad[m] -> phc[c] + fadh2[m]	(ATEG_06627) or (ATEG_09885)	AA:Arginine and proline metabolism	1.5.-.-
r0024	diamine N-acetyltransferase	accoa[c] + ptrsc[c] -> h[c] + coa[c] + naps[c]	(ATEG_04805)	AA:Arginine and proline metabolism	2.3.1.57
r0025	spermidine synthase	sprmd[c] + dsam[c] -> h[c] + spere[c] + mta[c]	(ATEG_00551)	AA:Arginine and proline metabolism	2.5.1.16
r0026	urea carboxylase / allophanate hydrolase	h2o[c] + 3 h[c] + ureac[c] -> 2 nh3[c] + 2 co2[c]	(ATEG_05246)	AA:Arginine and proline metabolism	3.5.1.54
r0027	non enzymatic	glugsal[c] <=> h2o[c] + h[c] + p5c[c]		AA:Arginine and proline metabolism
r0028	procollagen-proline dioxygenase	o2[c] + akg[c] + pro[c] -> co2[c] + succ[c] + hpro[c]	(ATEG_04742)	AA:Arginine and proline metabolism	1.14.11.2
r0029	N-Acetyl-gamma-glutamyl-phosphate reductase (EC 1.2.1.38) and acetylglutamate kinase (EC 2.7.2.8)	h[m] + nadph[m] + naglup[m] -> nadp[m] + naglus[m] + pi[m]	(ATEG_07160)	AA:Arginine and proline metabolism	1.2.1.38
r0030	glutamate-5-semialdehyde dehydrogenase	h[c] + nadph[c] + glup[c] -> nadp[c] + pi[c] + glugsal[c]	(ATEG_06846)	AA:Arginine and proline metabolism	1.2.1.41
r0031	1-pyrroline-5-carboxylate dehydrogenase	h2o[m] + nad[m] + glugsal[m] -> glu[m] + 2 h[m] + nadh[m]	(ATEG_06626) or (ATEG_09884) or (ATEG_01316)	AA:Arginine and proline metabolism	1.5.1.12
r0032	Pyrroline-5-carboxylate reductase	2 h[c] + nadph[c] + p5c[c] <=> pro[c] + nadp[c]	(ATEG_07474) or (ATEG_06079)	AA:Arginine and proline metabolism	1.5.1.2
r0033	Pyrroline-5-carboxylate reductase	2 h[c] + nadph[c] + phc[c] -> hpro[c] + nadp[c]	(ATEG_01115) or (ATEG_07474) or (ATEG_06079)	AA:Arginine and proline metabolism	1.5.1.2
r0034	Pyrroline-5-carboxylate reductase	2 h[c] + phc[c] + nadh[c] -> hpro[c] + nad[c]	(ATEG_01115) or (ATEG_07474) or (ATEG_06079)	AA:Arginine and proline metabolism	1.5.1.2
r0035	Proline dehydrogenase	nad[m] + pro[m] -> 2 h[m] + nadh[m] + p5c[m]	(ATEG_07475) or (ATEG_09885) or (ATEG_06627)	AA:Arginine and proline metabolism	1.5.99.8
r0036	Ornithine carbamoyltransferase	orn[m] + cap[m] -> h[m] + pi[m] + citr[m]	(ATEG_05492)	AA:Arginine and proline metabolism	2.1.3.3
r0037	Glutamate N-acetyltransferase	glu[m] + naorn[m] -> orn[m] + naglu[m]	(ATEG_08315)	AA:Arginine and proline metabolism	2.3.1.35
r0038	acetylornithine transaminase	glu[m] + naglus[m] -> akg[m] + naorn[m]	(ATEG_01186)	AA:Arginine and proline metabolism	2.6.1.11
r0039	ornithine aminotransferase	akg[c] + orn[c] -> glu[c] + glugsal[c]	(ATEG_05300)	AA:Arginine and proline metabolism	2.6.1.13
r0040	Gamma-glutamyl kinase, glutamate kinase	glu[c] + atp[c] -> glup[c] + adp[c]	(ATEG_06865)	AA:Arginine and proline metabolism	2.7.2.11
r0041	Acetylornithine deacetylase	h2o[m] + naorn[m] -> orn[m] + ac[m]	(ATEG_05203) or (ATEG_03304) or (ATEG_08785)	AA:Arginine and proline metabolism	3.5.1.16
r0042	amidase	h2o[c] + gbad[c] -> nh3[c] + gbat[c]	(ATEG_00654) or (ATEG_06125) or (ATEG_00898) or (ATEG_03385) or (ATEG_07338) or (ATEG_05856) or (ATEG_05674) or (ATEG_05679) or (ATEG_06407)	AA:Arginine and proline metabolism	3.5.1.4
r0043	Arginase (argA)	h2o[c] + arg[c] -> orn[c] + urea[c]	(ATEG_04679)	AA:Arginine and proline metabolism	3.5.3.1
r0044	Arginase (argA)	h2o[m] + arg[m] -> orn[m] + urea[m]	(ATEG_08114)	AA:Arginine and proline metabolism	3.5.3.1
r0045	Agmatinase	h2o[c] + agmt[c] -> ptrsc[c] + urea[c]	(ATEG_06192) or (ATEG_06764) or (ATEG_07315 and ATEG_06192) or (ATEG_07315) or (ATEG_08179 and ATEG_06192) or (ATEG_08179)	AA:Arginine and proline metabolism	3.5.3.11
r0046	Ornithine decarboxylase	h[c] + orn[c] -> co2[c] + ptrsc[c]	(ATEG_04936) or (ATEG_05404)	AA:Arginine and proline metabolism	4.1.1.17
r0047	Ornithine decarboxylase	h[m] + orn[m] -> co2[m] + ptrsc[m]	(ATEG_04936) or (ATEG_05404)	AA:Arginine and proline metabolism	4.1.1.17
r0048	Amino-acid N-acetyltransferase	glu[m] + accoa[m] -> h[m] + naglu[m] + coa[m]	(ATEG_01428) or (ATEG_08315)	AA:Arginine and proline metabolism	2.3.1.1
r0049	Acetylglutamate kinase	naglu[m] + atp[m] -> naglup[m] + adp[m]	(ATEG_07160) or (ATEG_07279) or (ATEG_09100)	AA:Arginine and proline metabolism	2.7.2.8
r0050	glutaminase	h2o[c] + gln[c] -> nh3[c] + glu[c]	(ATEG_06715) or (ATEG_06716)	AA:Arginine and proline metabolism:Alanine, aspartate and glutamate metabolism;EM:Nitrogen metabolism	3.5.1.2
r0051	spermidine synthase	ptrsc[c] + dsam[c] -> h[c] + sprmd[c] + mta[c]	(ATEG_00551) or (ATEG_10116)	AA:Arginine and proline metabolism:Cysteine and methionine metabolism	2.5.1.16
r0052	adenosylmethionine decarboxylase	h[c] + sam[c] <=> co2[c] + dsam[c]	(ATEG_08043)	AA:Arginine and proline metabolism:Cysteine and methionine metabolism	4.1.1.50
r0053	Argininosuccinate synthase	asp[c] + atp[c] + citr[c] -> 2 h[c] + amp[c] + ppi[c] + argsucc[c]	(ATEG_04211)	AA:Arginine and proline metabolism;AA:Alanine, aspartate and glutamate metabolism	6.3.4.5
r0054	Argininosuccinate lyase	argsucc[c] <=> arg[c] + fum[c]	(ATEG_01692)	AA:Arginine and proline metabolism;AA:Alanine, aspartate and glutamate metabolism	4.3.2.1
r0055	cystathionine lyase	h2o[c] + cysn[c] -> nh3[c] + pyr[c] + tcysn[c]	(ATEG_02246)	AA:Cysteine and methionine metabolism	4.4.1.8
r0056	thiosulfate/3-mercaptopyruvate sulfurtransferase	mrpyr[c] + slfi[c] -> pyr[c] + tsulf[c]	(ATEG_08681)	AA:Cysteine and methionine metabolism	2.8.1.1 2.8.1.2
r0057	L-lactate dehydrogenase	h[c] + nadh[c] + mrpyr[c] -> nad[c] + mrlac[c]	(ATEG_02218) or (ATEG_05509) or (ATEG_07183)	AA:Cysteine and methionine metabolism	1.1.1.27
r0058	non-enzymatic	h2o[c] + 3sulpyr[c] -> pyr[c] + slfi[c]		AA:cysteine and methionine metabolism
r0059	L-methionine (R)-S-oxide reductase	metso[c] + rthio[c] -> h2o[c] + met[c] + othio[c]	(ATEG_08178)	AA:Cysteine and methionine metabolism	1.8.4.14
r0060	1,2-dihydroxy-3-keto-5-methylthiopentene dioxygenase	o2[c] + dmpeno[c] -> 2 h[c] + mob[c] + for[c]	(ATEG_07012)	AA:Cysteine and methionine metabolism	1.13.11.54
r0061	1,2-dihydroxy-3-keto-5-methylthiopentene dioxygenase	o2[c] + dmpeno[c] -> h[c] + for[c] + mtprop[c] + co[c]	(ATEG_07012)	AA:Cysteine and methionine metabolism	1.13.11.53
r0062	Cystathionine gamma-synthase	h2o[c] + osuhs[c] -> nh3[c] + succ[c] + obut[c]	(ATEG_01774) or (ATEG_10058) or (ATEG_08987)	AA:Cysteine and methionine metabolism	2.5.1.48
r0063	Cystathionine gamma-synthase	h[c] + osuhs[c] + h2s[c] -> succ[c] + hcys[c]	(ATEG_01774) or (ATEG_10058) or (ATEG_08987)	AA:Cysteine and methionine metabolism	2.5.1.48
r0064	cysteine synthase	tsulf[c] + oaser[c] -> h[c] + ac[c] + scysn[c]	(ATEG_00153)	AA:Cysteine and methionine metabolism	2.5.1.47
r0065	5'-methylthioadenosine phosphorylase	pi[c] + mta[c] -> ad[c] + mtrip[c]	(ATEG_06619)	AA:Cysteine and methionine metabolism	2.5.1.16
r0066	methylthioribose-1-phosphate isomerase:dehydratase	mtrip[c] -> h2o[c] + dkmtp[c]	(ATEG_07401 and ATEG_03165)	AA:Cysteine and methionine metabolism	5.3.1.23:4.2.1.109
r0067	L-amino-acid oxidase	h2o[m] + o2[m] + met[m] -> h2o2[m] + nh3[m] + mob[m]	(ATEG_07543) or (ATEG_01932)	AA:Cysteine and methionine metabolism	1.4.3.2
r0068	L-amino-acid oxidase	h2o[c] + o2[c] + met[c] -> h2o2[c] + nh3[c] + mob[c]	(ATEG_07543) or (ATEG_01932)	AA:Cysteine and methionine metabolism	1.4.3.2
r0069	L-aspartate:2-oxoglutarate aminotransferase	akg[c] + 3sulala[c] -> glu[c] + 3sulpyr[c]	(ATEG_07203)	AA:Cysteine and methionine metabolism	2.6.1.1
r0070	Transferases	glu[c] + mob[c] -> akg[c] + met[c]	(ATEG_01227) or (ATEG_01349)	AA:Cysteine and methionine metabolism	2.6.1.5;2.6.1.57
r0071	Homocysteine S-methyltransferase	sam[c] + hcys[c] -> h[c] + met[c] + sah[c]	(ATEG_01199)	AA:Cysteine and methionine metabolism	2.1.1.10
r0072	Methionine synthase	hcys[c] + mthf[c] -> met[c] + thf[c]	(ATEG_05472) or (ATEG_04752) or (ATEG_07249)	AA:Cysteine and methionine metabolism	2.1.1.14
r0073	Cystathionine gamma-synthase	cys[c] + oahser[c] -> h[c] + ac[c] + llct[c]	(ATEG_01774) or (ATEG_10058) or (ATEG_08987)	AA:Cysteine and methionine metabolism	2.5.1.48
r0074	O-acetylhomoserine lyase	oahser[c] + h2s[c] -> hcys[c] + ac[c]	(ATEG_07988)	AA:Cysteine and methionine metabolism	2.5.1.49
r0075	O-acetylhomoserine	oahser[c] + mseth[c] -> h[c] + met[c] + ac[c]	(ATEG_07988)	AA:Cysteine and methionine metabolism	2.5.1.49
r0076	methionine adenosyltransferase	h2o[c] + atp[c] + met[c] -> h[c] + ppi[c] + pi[c] + sam[c]	(ATEG_09181 and ATEG_00255)	AA:Cysteine and methionine metabolism	2.5.1.6
r0077	adenosylhomocysteinase	h2o[c] + sah[c] -> hcys[c] + adn[c]	(ATEG_00163)	AA:Cysteine and methionine metabolism	3.3.1.1
r0078	Cystathionine gamma-lyase	h2o[c] + llct[c] <=> nh3[c] + cys[c] + obut[c]	(ATEG_01774) or (ATEG_10058) or (ATEG_00046)	AA:Cysteine and methionine metabolism	4.4.1.1
r0079	cystathionine lyase	h2o[c] + cys[c] <=> nh3[c] + pyr[c] + h[c] + h2s[c]	(ATEG_00046) or (ATEG_02246) or (ATEG_02247)	AA:Cysteine and methionine metabolism	4.4.1.1 4.4.1.8
r0080	Cystathionine beta-synthase	hcys[c] + ser[c] -> h2o[c] + llct[c]	(ATEG_06869)	AA:Cysteine and methionine metabolism:Glycine, serine and threonine metabolism	4.2.1.22
r0081	L-Serine ammonia-lyase	ser[c] -> nh3[c] + pyr[c]	(ATEG_03017) or (ATEG_05420) or (ATEG_03508)	AA:Cysteine and methionine metabolism:Glycine, serine and threonine metabolism	4.3.1.17 4.3.1.19
r0082	L-amino-acid oxidase	h2o[c] + o2[c] + trp[c] -> h2o2[c] + nh3[c] + ipyr[c]	(ATEG_01932) or (ATEG_07543)	AA:Cysteine and methionine metabolism:Tryptophan metabolism	1.4.3.2
r0083	aspartate-semialdehyde dehydrogenase	h[c] + nadph[c] + basp[c] -> nadp[c] + pi[c] + aspsa[c]	(ATEG_08737)	AA:Cysteine and methionine metabolism;AA:Lysine biosynthesis;AA:Glycine, serine and threonine metabolism	1.2.1.11
r0084	Aspartate kinase	asp[c] + atp[c] -> adp[c] + basp[c]	(ATEG_09470)	AA:Cysteine and methionine metabolism;AA:Lysine biosynthesis;AA:Glycine, serine and threonine metabolism	2.7.2.4
r0085	Cystathionine gamma-synthase	cys[c] + osuhs[c] -> succ[c] + llct[c]	(ATEG_01774) or (ATEG_10058) or (ATEG_08987)	AA:Cysteine and methionine metabolism;EM:Sulfur metabolism	2.5.1.48
r0086	cysteine synthase;O-acetylhomoserine (thiol)-lyase	tsulf[c] + rthio[c] + oaser[c] -> h[c] + cys[c] + slfi[c] + othio[c] + ac[c]	(ATEG_09173) or (ATEG_02224) or (ATEG_00153)	AA:Cysteine and methionine metabolism;EM:Sulfur metabolism	2.5.1.47 2.5.1.49
r0087	serine O-acetyltransferase	accoa[c] + ser[c] -> coa[c] + oaser[c]	(ATEG_09680)	AA:Cysteine and methionine metabolism;EM:Sulfur metabolism	2.3.1.30
r0088	homoserine O-acetyltransferase	accoa[c] + hser[c] -> coa[c] + oahser[c]	(ATEG_09331) or (ATEG_05257) or (ATEG_07915) or (ATEG_05782)	AA:Cysteine and methionine metabolism;EM:Sulfur metabolism	2.3.1.31
r0089	cysteine synthase	h2s[c] + oaser[c] -> cys[c] + ac[c]	(ATEG_09173) or (ATEG_02224) or (ATEG_00153)	AA:Cysteine and methionine metabolism;EM:Sulfur metabolism	2.5.1.47
r0090	Cystathionine gamma-synthase	tsulf[c] + rthio[c] + oahser[c] -> h[c] + slfi[c] + hcys[c] + othio[c] + ac[c]	(ATEG_01774) or (ATEG_10058) or (ATEG_08987)	AA:Cysteine and methionine metabolism;EM:Sulfur metabolism;OA:Selenocompound metabolism	2.5.1.48
r0091	Cysteine dioxygenase	o2[c] + cys[c] -> h[c] + 3sulala[c]	(ATEG_03072) or (ATEG_06128)	AA:Cysteine and methionine metabolism;OA:Taurine and hypotaurine metabolism	1.13.11.20
r0092	glutamate synthase (NADH)	akg[c] + gln[c] + h[c] + nadh[c] -> 2 glu[c] + nad[c]	(ATEG_10174)	AA:Glutamate and glutamine metabolism	1.4.1.14
r0093	Glutamate dehydrogenase (nad+)	h2o[c] + glu[c] + nad[c] -> nh3[c] + akg[c] + h[c] + nadh[c]	(ATEG_06790)	AA:Glutamate and glutamine metabolism	1.4.1.2
r0094	Glutamate dehydrogenase (nadp+)	h2o[c] + glu[c] + nadp[c] <=> nh3[c] + akg[c] + h[c] + nadph[c]	(ATEG_08298) or (ATEG_05563)	AA:Glutamate and glutamine metabolism	1.4.1.4
r0095	1-pyrroline-5-carboxylate dehydrogenase	h2o[m] + nadp[m] + glugsal[m] -> glu[m] + 2 h[m] + nadph[m]	(ATEG_01316) or (ATEG_06626) or (ATEG_09884)	AA:Glutamate and glutamine metabolism	1.5.1.12
r0096	1-pyrroline-5-carboxylate dehydrogenase	2 h2o[m] + nad[m] + p5c[m] -> glu[m] + h[m] + nadh[m]	(ATEG_01316) or (ATEG_06626) or (ATEG_09884)	AA:Glutamate and glutamine metabolism	1.5.1.12
r0097	Amine oxidase	h2o[c] + o2[c] + amac[c] -> h2o2[c] + nh3[c] + mgxl[c]	(ATEG_00308) or (ATEG_03518) or (ATEG_05737)	AA:Glycine, serine and threonine metabolism	1.4.3.4
r0098	glycine hydroxymethyltransferase	thf[c] + ser[c] <=> h2o[c] + gly[c] + metthf[c]	(ATEG_01548) or (ATEG_03486) or (ATEG_09625) or (ATEG_09626) or (ATEG_09630) or (ATEG_09631)	AA:Glycine, serine and threonine metabolism	2.1.2.1
r0099	Choline dehydrogenase	h[c] + fad[c] + cln[c] -> fadh2[c] + betald[c]	(ATEG_00487) or (ATEG_00801) or (ATEG_01660)	AA:Glycine, serine and threonine metabolism	1.1.99.1
r0100	serine---pyruvate transaminase	ser[c] + pyr[c] <=> 3hpyr[c] + ala[c]	(ATEG_08570)	AA:Glycine, serine and threonine metabolism	2.6.1.51
r0101	L-serine hydro-lyase	ser[c] + h2s[c] -> cys[c] + h2o[c]	(ATEG_06869)	AA:Glycine, serine and threonine metabolism	4.2.1.22
r0102	D-amino-acid oxidase	gly[c] + h2o[c] + o2[c] -> glx[c] + nh3[c] + h2o2[c]	(ATEG_07717) or (ATEG_02494) or (ATEG_09513)	AA:Glycine, serine and threonine metabolism	1.4.3.3
r0103	sarcosine oxidase	h2o[m] + o2[m] + sarc[m] -> h2o2[m] + gly[m] + fald[m]	(ATEG_04543)	AA:Glycine, serine and threonine metabolism	1.5.3.1
r0104	Phosphoglycerate dehydrogenase	nad[c] + 3pg[c] <=> h[c] + nadh[c] + php[c]	(ATEG_05943) or (ATEG_02699) or (ATEG_09478) or (ATEG_01217) or (ATEG_00640) or (ATEG_03881)	AA:Glycine, serine and threonine metabolism	1.1.1.95
r0105	Choline dehydrogenase	h[e] + fad[e] + cln[e] -> fadh2[e] + betald[e]	(ATEG_00487) or (ATEG_00801) or (ATEG_07516)	AA:Glycine, serine and threonine metabolism	1.1.99.1
r0106	betaine aldehyde dehydrogenase	h2o[c] + nad[c] + betald[c] -> 2 h[c] + nadh[c] + bet[c]	(ATEG_00020)	AA:Glycine, serine and threonine metabolism	1.2.1.8
r0107	Amine oxidase	h2o[m] + o2[m] + amac[m] -> h2o2[m] + nh3[m] + mgxl[m]	(ATEG_10301) or (ATEG_07851) or (ATEG_03182)	AA:Glycine, serine and threonine metabolism	1.4.3.4
r0108	glycine dehydrogenase (decarboxylating)	h[m] + nadh[m] + hplys[m] <=> nad[m] + dhplys[m]	(ATEG_02190)	AA:Glycine, serine and threonine metabolism	1.4.4.2
r0109	dimethylglycine dehydrogenase	h2o[m] + h[m] + fad[m] + dmgly[m] -> fadh2[m] + sarc[m] + fald[m]	(ATEG_07503)	AA:Glycine, serine and threonine metabolism	1.5.99.2
r0110	L-Threonine 3-dehydrogenase	nad[c] + thr[c] -> h[c] + nadh[c] + aobut[c]	(ATEG_02471) or (ATEG_05068)	AA:Glycine, serine and threonine metabolism	1.1.1.103
r0111	Aminomethyltransferase	nad[m] + gly[m] + thf[m] -> nh3[m] + nadh[m] + co2[m] + metthf[m]	(ATEG_00271)	AA:Glycine, serine and threonine metabolism	1.4.4.2:1.8.1.4:2.1.2.10
r0112	alanine-glyoxylate transaminase	ala[m] + glx[m] <=> pyr[m] + gly[m]	(ATEG_08570)	AA:Glycine, serine and threonine metabolism	2.6.1.44
r0113	phosphoserine aminotransferase	glu[c] + php[c] <=> akg[c] + 3pser[c]	(ATEG_01055)	AA:Glycine, serine and threonine metabolism	2.6.1.52
r0114	Homoserine kinase	atp[c] + hser[c] -> h[c] + adp[c] + phser[c]	(ATEG_09451)	AA:Glycine, serine and threonine metabolism	2.7.1.39
r0115	phosphoserine phosphatase	h2o[c] + 3pser[c] -> pi[c] + ser[c]	(ATEG_08763) or (ATEG_03155)	AA:Glycine, serine and threonine metabolism	3.1.3.3
r0116	Threonine aldolase	gly[c] + acal[c] <=> thr[c]	(ATEG_02310) or (ATEG_07833) or (ATEG_06290) or (ATEG_06292)	AA:Glycine, serine and threonine metabolism	4.1.2.5
r0117	Threonine synthase	h2o[c] + phser[c] -> pi[c] + thr[c]	(ATEG_06409)	AA:Glycine, serine and threonine metabolism	4.2.3.1
r0118	glutamate--glyoxylate aminotransferase	gly[c] + akg[c] <=> glx[c] + glu[c]	(ATEG_08570)	AA:Glycine, serine and threonine metabolism:Glyoxylate and dicarboxylate metabolism	2.6.1.44
r0119	threonine dehydratase	thr[c] -> nh3[c] + obut[c]	(ATEG_03508) or (ATEG_03017)	AA:Glycine, serine and threonine metabolism:Valine, leucine and isoleucine biosynthesis	4.3.1.19
r0120	homoserine dehydrogenase	h[c] + nadph[c] + aspsa[c] -> nadp[c] + hser[c]	(ATEG_04700)	AA:Glycine, serine and threonine metabolism;AA:Cysteine and methionine metabolism;AA:Lysine biosynthesis	1.1.1.3
r0121	threonine dehydratase	thr[m] -> nh3[m] + obut[m]	(ATEG_05389) or (ATEG_03508)	AA:Glycine, serine and threonine metabolism;AA:Valine, leucine and isoleucine biosynthesis	4.3.1.19
r0122	serine-glyoxylate transaminase	ser[c] + glx[c] <=> 3hpyr[c] + gly[c]	(ATEG_08570)	AA:Glycine, serine and threonine metabolism;CM:Glyoxylate and dicarboxylate metabolism;EM:Methane metabolism	2.6.1.45
r0123	Aminomethyltransferase	h2o[m] + methf[m] -> h[m] + foli[m]	(ATEG_00271)	AA:Glycine, serine and threonine metabolism;CV:One carbon pool by folate	2.1.2.10
r0124	Aminomethyltransferase	nh3[m] + metthf[m] + dhplys[m] <=> h[m] + thf[m] + hpsamlys[m]	(ATEG_01548) or (ATEG_03486) or (ATEG_09625) or (ATEG_09626) or (ATEG_09630) or (ATEG_09631)	AA:Glycine, serine and threonine metabolism;CV:One carbon pool by folate	2.1.2.10
r0125	Aminomethyltransferase	co2[m] + hpsamlys[m] <=> gly[m] + hplys[m]	(ATEG_00271)	AA:Glycine, serine and threonine metabolism;CV:One carbon pool by folate	2.1.2.10
r0126	aromatic-L-amino-acid decarboxylase	h[c] + his[c] <=> co2[c] + hisan[c]	(ATEG_07532)	AA:Histidine metabolism	4.1.1.28
r0127	ATP phosphoribosyltransferase	atp[c] + prpp[c] -> h[c] + ppi[c] + prbatp[c]	(ATEG_04337)	AA:Histidine metabolism	2.4.2.17
r0128	histidinol dehydrogenase	h2o[c] + 2 nad[c] + hisol[c] -> 3 h[c] + 2 nadh[c] + his[c]	(ATEG_00659)	AA:Histidine metabolism	1.1.1.23
r0129	HNRNP arginine N-methyltransferase	his[c] + sam[c] -> mhis[c] + sah[c]	(ATEG_02818) or (ATEG_09869) or (ATEG_02132)	AA:Histidine metabolism	2.1.1.-
r0130	ribose-phosphate diphosphokinase	atp[c] + r5p[c] -> h[c] + amp[c] + prpp[c]	(ATEG_03990) or (ATEG_04065) or (ATEG_06364)	AA:Histidine metabolism	2.7.6.1
r0131	Glutamine amidotransferase:cyclase/imidazole glycerol phosphate synthase	gln[c] + prlp[c] <=> glu[c] + 2 h[c] + aicar[c] + dimgp[c]	(ATEG_05616)	AA:Histidine metabolism	2.4.2.-:4.1.3.-
r0132	histidinol-phosphate transaminase	glu[c] + imacp[c] -> akg[c] + hisolp[c]	(ATEG_00611)	AA:Histidine metabolism	2.6.1.9
r0133	histidinol-phosphatase	h2o[c] + hisolp[c] -> pi[c] + hisol[c]	(ATEG_02237)	AA:Histidine metabolism	3.1.3.15
r0134	phosphoribosyl-AMP cyclohydrolase	h2o[c] + prbamp[c] -> prfp[c]	(ATEG_00659)	AA:Histidine metabolism	3.5.4.19
r0135	phosphoribosyl-ATP diphosphatase	h2o[c] + prbatp[c] -> 2 h[c] + ppi[c] + prbamp[c]	(ATEG_00659)	AA:Histidine metabolism	3.6.1.31
r0136	Imidazoleglycerol-phosphate dehydratase	dimgp[c] -> h2o[c] + imacp[c]	(ATEG_06978)	AA:Histidine metabolism	4.2.1.19
r0137	1-(5-phosphoribosyl)-5-[(5-phosphoribosylamino)methylideneamino]imidazole-4-carboxamide isomerase	h[c] + prfp[c] -> prlp[c]	(ATEG_09413)	AA:Histidine metabolism	5.3.1.16
r0138	Homoisocitrate dehydrogenase	nadh[m] + co2[m] + aka[m] <=> nad[m] + hicit[m]	(ATEG_03691)	AA:Lysine biosynthesis	1.1.1.87
r0139	L-aminoadipate-semialdehyde dehydrogenase	2 h[m] + nadph[m] + ama[m] -> h2o[m] + nadp[m] + amasa[m]	(ATEG_03957) or (ATEG_09142) or (ATEG_05795) or (ATEG_06998)	AA:Lysine biosynthesis	1.2.1.31
r0140	L-aminoadipate-semialdehyde dehydrogenase	2 h[m] + nadh[m] + ama[m] -> h2o[m] + nad[m] + amasa[m]	(ATEG_03957) or (ATEG_09142) or (ATEG_05795) or (ATEG_06998)	AA:Lysine biosynthesis	1.2.1.31
r0141	Saccharopine dehydrogenase (NADP+, L-glutamate forming)	glu[m] + h[m] + nadph[m] + amasa[m] <=> h2o[m] + nadp[m] + sacp[m]	(ATEG_00074)	AA:Lysine biosynthesis	1.5.1.10
r0142	Saccharopine dehydrogenase (NAD+, L-lysine forming)	h2o[m] + nad[m] + sacp[m] <=> akg[m] + h[m] + nadh[m] + lys[m]	(ATEG_04713)	AA:Lysine biosynthesis	1.5.1.7
r0143	Homocitrate synthase	h2o[m] + akg[m] + accoa[m] -> h[m] + coa[m] + hcit[m]	(ATEG_00906)	AA:Lysine biosynthesis	2.3.3.14
r0144	Homoaconitate hydratase	h2o[m] + hacn[m] <=> hicit[m]	(ATEG_05677)	AA:Lysine biosynthesis	4.2.1.36
r0145	Dihydrodipicolinate synthase	pyr[c] + aspsa[c] -> 2 h2o[c] + h[c] + didipc[c]	(ATEG_00980) or (ATEG_08299) or (ATEG_05516) or (ATEG_00124)	AA:Lysine biosynthesis	4.2.1.52
r0146	2-Methylcitrate dehydratase	h2o[m] + hacn[m] <=> hcit[m]	(ATEG_01342) or (ATEG_07091) or (ATEG_01342)	AA:Lysine biosynthesis	4.2.1.36
r0147	2-aminoadipate transaminase	glu[c] + aka[c] <=> akg[c] + ama[c]	(ATEG_00647) or (ATEG_02505)	AA:Lysine biosynthesis:Lysine degradation	2.6.1.39
r0148	2-aminoadipate transaminase	glu[m] + aka[m] <=> akg[m] + ama[m]	(ATEG_01349)	AA:Lysine biosynthesis;AA:Lysine degradation	2.6.1.57
r0149	phenylalanine degradation	h2o[m] + nadp[m] + phal[m] <=> 2 h[m] + nadph[m] + pac[m]	(ATEG_08300) or (ATEG_06083) or (ATEG_05338) or (ATEG_01761)	AA:Phenylalanine metabolism	1.2.1.5
r0150	Phenethylamine:oxygen oxidoreductase (deaminating);monoamine oxidase	h2o[c] + o2[c] + phem[c] <=> h2o2[c] + nh3[c] + phal[c]	(ATEG_01230)	AA:Phenylalanine metabolism	1.4.3.4 1.4.3.21
r0151	Phenylpyruvate:oxygen oxidoreductase (hydroxylating,decarboxylating);4-hydroxyphenylpyruvate dioxygenase	o2[m] + ppyr[m] -> co2[m] + hphea[m]	(ATEG_05921)	AA:Phenylalanine metabolism	1.13.11.27
r0152	peroxidase	o2[m] + phe[m] -> h2o[m] + co2[m] + pad[m]	(ATEG_08422)	AA:Phenylalanine metabolism	1.11.1.7
r0153	Aromatic-L-amino-acid decarboxylase	h[c] + phe[c] -> co2[c] + phem[c]	(ATEG_07532)	AA:Phenylalanine metabolism	4.1.1.28
r0154	catalase/peroxidase	2 h2o2[m] -> 2 h2o[m] + o2[m]	(ATEG_08422)	AA:Phenylalanine metabolism:Tryptophan metabolism;EM:Methane metabolism	1.11.1.6;1.11.1.12
r0155	phenylacetate 2-hydroxylase	o2[m] + h[m] + nadh[m] + pac[m] -> h2o[m] + nad[m] + hphea[m]	(ATEG_09973) or (ATEG_09785)	AA:Phenylalanine metabolism;XB:Styrene degradation	1.14.13.-
r0156	2-phenylacetamide amidohydrolase	h2o[m] + pad[m] -> nh3[m] + pac[m]	(ATEG_06165) or (ATEG_05856) or (ATEG_00861)	AA:Phenylalanine metabolism;XB:Styrene degradation	3.5.1.4
r0157	chorismate synthase	3psme[c] -> pi[c] + chor[c]	(ATEG_02924)	AA:Phenylalanine, tyrosine and tryptophan biosynthesis	4.2.3.5
r0158	3-dehydroshikimate dehydratase	h2o[c] + pcace[c] <=> dhsk[c]	(ATEG_00581)	AA:Phenylalanine, tyrosine and tryptophan biosynthesis	4.2.1.118 4.2.1.-
r0159	3-dehydroshikimate dehydratase	dhsk[c] -> h2o[c] + papce[c]	(ATEG_07674)	AA:Phenylalanine, tyrosine and tryptophan biosynthesis	4.2.1.118
r0160	3-dehydroshikimate dehydratase	dhsk[e] -> h2o[e] + papce[e]	(ATEG_00348)	AA:Phenylalanine, tyrosine and tryptophan biosynthesis	4.2.1.118
r0161	Prephenate dehydrogenase (NADP+)	nadp[c] + phen[c] -> co2[c] + nadph[c] + 4hppyr[c]	(ATEG_01527)	AA:Phenylalanine, tyrosine and tryptophan biosynthesis	1.3.1.13
r0162	quinate dehydrogenase	h[c] + nadh[c] + dqt[c] <=> nad[c] + qt[c]	(ATEG_00350)	AA:Phenylalanine, tyrosine and tryptophan biosynthesis	1.1.1.24
r0163	shikimate dehydrogenase	h[c] + nadh[c] + dhsk[c] -> nad[c] + sme[c]	(ATEG_07674)	AA:Phenylalanine, tyrosine and tryptophan biosynthesis	1.1.1.25
r0164	shikimate dehydrogenase	h[c] + nadph[c] + dhsk[c] -> nadp[c] + sme[c]	(ATEG_00581)	AA:Phenylalanine, tyrosine and tryptophan biosynthesis	1.1.1.25
r0165	anthranilate phosphoribosyltransferase	prpp[c] + an[c] -> h[c] + ppi[c] + npran[c]	(ATEG_03865)	AA:Phenylalanine, tyrosine and tryptophan biosynthesis	2.4.2.18
r0166	3-phosphoshikimate 1-carboxyvinyltransferase	pep[c] + sme3p[c] -> pi[c] + 3psme[c]	(ATEG_00581)	AA:Phenylalanine, tyrosine and tryptophan biosynthesis	2.5.1.19
r0167	3-deoxy-7-phosphoheptulonate synthase	h2o[c] + pep[c] + e4p[c] -> pi[c] + 3ddah7p[c]	(ATEG_04287) or (ATEG_04882) or (ATEG_09067) or (ATEG_05286)	AA:Phenylalanine, tyrosine and tryptophan biosynthesis	2.5.1.54
r0168	shikimate kinase	atp[c] + sme[c] -> h[c] + adp[c] + sme3p[c]	(ATEG_00581)	AA:Phenylalanine, tyrosine and tryptophan biosynthesis	2.7.1.71
r0169	Aminocarboxymuconate-semialdehyde decarboxylase	2 h[c] + cmusa[c] -> co2[c] + am6sa[c]	(ATEG_02018) or (ATEG_10010)	AA:Phenylalanine, tyrosine and tryptophan biosynthesis	4.1.1.45
r0170	indole-3-glycerol-phosphate synthase	h[c] + cpad5p[c] -> h2o[c] + co2[c] + igp[c]	(ATEG_00504)	AA:Phenylalanine, tyrosine and tryptophan biosynthesis	4.1.1.48
r0171	Anthranilate synthase	gln[c] + chor[c] -> glu[c] + pyr[c] + h[c] + an[c]	(ATEG_03262 and ATEG_00504 and ATEG_10162) or (ATEG_00504)	AA:Phenylalanine, tyrosine and tryptophan biosynthesis	4.1.3.27
r0172	3-dehydroquinate dehydratase 1	dqt[c] -> h2o[c] + dhsk[c]	(ATEG_00581) or (ATEG_07673.1) or (ATEG_07673.2) or (ATEG_00353)	AA:Phenylalanine, tyrosine and tryptophan biosynthesis	4.2.1.10
r0173	tryptophan synthase	ser[c] + igp[c] -> h2o[c] + trp[c] + t3p1[c]	(ATEG_01301) or (ATEG_06425) or (ATEG_07720)	AA:Phenylalanine, tyrosine and tryptophan biosynthesis	4.2.1.20
r0174	Prephenate dehydratase	h[c] + phen[c] -> h2o[c] + co2[c] + ppyr[c]	(ATEG_09463)	AA:Phenylalanine, tyrosine and tryptophan biosynthesis	4.2.1.51
r0175	3-dehydroquinate synthase	3ddah7p[c] -> pi[c] + dqt[c]	(ATEG_00581)	AA:Phenylalanine, tyrosine and tryptophan biosynthesis	4.2.3.4
r0176	Maleylacetoacetate isomerase	macac[c] -> fuacac[c]	(ATEG_05925)	AA:Phenylalanine, tyrosine and tryptophan biosynthesis	5.2.1.2
r0177	phosphoribosylanthranilate isomerase	npran[c] -> cpad5p[c]	(ATEG_00504)	AA:Phenylalanine, tyrosine and tryptophan biosynthesis	5.3.1.24
r0178	Chorismate mutase	chor[c] -> phen[c]	(ATEG_06197)	AA:Phenylalanine, tyrosine and tryptophan biosynthesis	5.4.99.5
r0179	L-amino-acid oxidase	h2o[c] + o2[c] + phe[c] -> h2o2[c] + nh3[c] + ppyr[c]	(ATEG_07543) or (ATEG_01932)	AA:Phenylalanine, tyrosine and tryptophan biosynthesis:Phenylalanine metabolism	1.4.3.2
r0180	L-amino-acid oxidase	h2o[c] + o2[c] + tyr[c] -> h2o2[c] + nh3[c] + 4hppyr[c]	(ATEG_07543) or (ATEG_01932)	AA:Phenylalanine, tyrosine and tryptophan biosynthesis:Tyrosine metabolism	1.4.3.2
r0181	L-aspartate:2-oxoglutarate aminotransferase	akg[c] + phe[c] <=> glu[c] + ppyr[c]	(ATEG_07168) or (ATEG_03935) or (ATEG_09029) or (ATEG_09275)	AA:Phenylalanine, tyrosine and tryptophan biosynthesis;AA:Phenylalanine metabolism	2.6.1.1;2.6.1.5;2.6.1.9;2.6.1.57
r0182	L-tyrosine:2-oxoglutarate aminotransferase	akg[c] + tyr[c] <=> glu[c] + 4hppyr[c]	(ATEG_07168) or (ATEG_03935) or (ATEG_09029) or (ATEG_07203)	AA:Phenylalanine, tyrosine and tryptophan biosynthesis;AA:Phenylalanine metabolism	2.6.1.1;2.6.1.5;2.6.1.9;2.6.1.57
r0183	3-hydroxyanthranilate 3,4-dioxygenase	o2[c] + han[c] -> h[c] + cmusa[c]	(ATEG_00088)	AA:Tryptophan metabolism	1.13.11.6
r0184	L-amino-acid oxidase	h2o[m] + o2[m] + trp[m] -> h2o2[m] + nh3[m] + ipyr[m]	(ATEG_07543) or (ATEG_01932)	AA:Tryptophan metabolism	1.4.3.2
r0185	tryptophan aminotransferase	akg[c] + trp[c] -> glu[c] + ipyr[c]	(ATEG_01349)	AA:Tryptophan metabolism	2.6.1.27
r0186	indolepyruvate decarboxylase	h[c] + ipyr[c] -> co2[c] + i3ad[c]	(ATEG_06881)	AA:Tryptophan metabolism	4.1.1.74
r0187	2-oxoglutarate dehydrogenase E1 component	nad[m] + coa[m] + aka[m] -> nadh[m] + co2[m] + gltcoa[m]	(ATEG_03911) or (ATEG_09529)	AA:Tryptophan metabolism	1.2.4.2
r0188	monoamine oxidase	h2o[c] + o2[c] + trpm[c] -> h2o2[c] + nh3[c] + i3ad[c]	(ATEG_01230)	AA:Tryptophan metabolism	1.4.3.4
r0189	tryptophan 2,3-dioxygenase	o2[c] + trp[c] -> fkyn[c]	(ATEG_00759) or (ATEG_03482) or (ATEG_07359)	AA:Tryptophan metabolism	1.13.11.52
r0190	Kynurenine 3-monooxygenase	o2[m] + h[m] + nadph[m] + kyn[m] -> h2o[m] + nadp[m] + hkyn[m]	(ATEG_03699)	AA:Tryptophan metabolism	1.14.13.9
r0191	kynurenine-oxoglutarate transaminase	akg[c] + kyn[c] -> glu[c] + apebu[c]	(ATEG_03962)	AA:Tryptophan metabolism	2.6.1.7
r0192	Kynureninase	h2o[c] + kyn[c] -> ala[c] + h[c] + an[c]	(ATEG_00758) or (ATEG_04474) or (ATEG_08317)	AA:Tryptophan metabolism	3.7.1.3
r0193	Kynureninase	h2o[c] + hkyn[c] -> ala[c] + h[c] + han[c]	(ATEG_00758) or (ATEG_04474) or (ATEG_08317)	AA:Tryptophan metabolism	3.7.1.3
r0194	Aromatic-L-amino-acid decarboxylase	h[c] + trp[c] -> co2[c] + trpm[c]	(ATEG_07532)	AA:Tryptophan metabolism	4.1.1.28
r0195	Kynurenine formamidase	h2o[c] + fkyn[c] -> h[c] + for[c] + kyn[c]	(ATEG_00191)	AA:Tryptophan metabolism;CM:Glyoxylate and dicarboxylate metabolism	3.5.1.9
r0196	Nitrilase	2 h2o[c] + acnl[c] -> nh3[c] + iaa[c]	(ATEG_07252) or (ATEG_03360)	AA:Tryptophan metabolism;EM:Nitrogen metabolism	3.5.5.1
r0197	2,4-dihydroxyhept-2-ene-1,7-dioic acid aldolase	dhpen[m] -> pyr[m] + succsal[m]	(ATEG_02685)	AA:Tyrosine metabolism	4.1.2.-
r0198	gentisate 1,2-dioxygenase	o2[c] + 25dhba[c] -> h[c] + mpyr[c]	(ATEG_06712)	AA:Tyrosine metabolism	1.13.11.4
r0199	homogentisate 1,2-dioxygenase	h[c] + macac[c] <=> o2[c] + homogen[c]	(ATEG_03803) or (ATEG_05923) or (ATEG_10341) or (ATEG_03618)	AA:Tyrosine metabolism	1.13.11.5
r0200	Fumarylacetoacetase	h2o[c] + fuacac[c] -> h[c] + fum[c] + acact[c]	(ATEG_09235) or (ATEG_05924) or (ATEG_01656)	AA:Tyrosine metabolism	3.7.1.2
r0201	4-hydroxyphenylpyruvate dioxygenase	o2[c] + 4hppyr[c] -> co2[c] + homogen[c]	(ATEG_05921)	AA:Tyrosine metabolism;CV:Ubiquinone and other terpenoid-quinone biosynthesis	1.13.11.27
r0202	catechol O-methyltransferase	h2o[c] + nadp[c] + fald[c] + ccl[c] <=> o2[c] + h[c] + nadph[c] + gua[c]	(ATEG_09300) or (ATEG_07862)	AA:Tyrosine metabolism;LM:Steroid hormone biosynthesis	2.1.1.6
r0203	spontaneous (following EC 1.1.1.85	oicap[c] + h[c] -> 4mop[c] + co2[c]		AA:Valine, leucine and isoleucine biosynthesis
r0204	spontaneous (following EC 1.1.1.85	oicap[m] + h[m] -> 4mop[m] + co2[m]		AA:Valine, leucine and isoleucine biosynthesis
r0205	ketol-acid reductoisomerase	h[m] + nadph[m] + abut[m] <=> nadp[m] + dmvat[m]	(ATEG_03509)	AA:Valine, leucine and isoleucine biosynthesis	1.1.1.86
r0206	3-isopropylmalate dehydrogenase	nad[m] + ippmal[m] <=> h[m] + nadh[m] + oicap[m]	(ATEG_03407) or (ATEG_05216)	AA:Valine, leucine and isoleucine biosynthesis	1.1.1.85
r0207	Ketol-acid reductoisomerase	h[m] + nadph[m] + aclac[m] -> nadp[m] + dhmva[m]	(ATEG_03509)	AA:Valine, leucine and isoleucine biosynthesis	1.1.1.86
r0208	dihydroxy-acid dehydratase	dhmva[m] -> h2o[m] + oival[m]	(ATEG_10170) or (ATEG_02317) or (ATEG_08702) or (ATEG_01080) or (ATEG_03098) or (ATEG_04415) or (ATEG_04415)	AA:Valine, leucine and isoleucine biosynthesis	4.2.1.9
r0209	dihydroxy-acid dehydratase	dmvat[m] -> h2o[m] + omval[m]	(ATEG_10170) or (ATEG_02317) or (ATEG_08702) or (ATEG_01080) or (ATEG_03098) or (ATEG_04415) or (ATEG_04415)	AA:Valine, leucine and isoleucine biosynthesis	4.2.1.9
r0210	branched-chain-amino-acid transaminase	glu[c] + omval[c] <=> akg[c] + ile[c]	(ATEG_04478)	AA:Valine, leucine and isoleucine biosynthesis:Valine, leucine and isoleucine degradation	2.6.1.42
r0211	branched-chain-amino-acid transaminase	glu[m] + omval[m] <=> akg[m] + ile[m]	(ATEG_06808)	AA:Valine, leucine and isoleucine biosynthesis:Valine, leucine and isoleucine degradation	2.6.1.42	Uniprot
r0212	branched-chain-amino-acid transaminase	glu[m] + 4mop[m] <=> akg[m] + leu[m]	(ATEG_06808)	AA:Valine, leucine and isoleucine biosynthesis:Valine, leucine and isoleucine degradation	2.6.1.42
r0213	branched-chain-amino-acid transaminase	glu[c] + 4mop[c] <=> akg[c] + leu[c]	(ATEG_04478) or (ATEG_04923) or (ATEG_10023)	AA:Valine, leucine and isoleucine biosynthesis:Valine, leucine and isoleucine degradation	2.6.1.42
r0214	branched-chain-amino-acid transaminase	glu[m] + oival[m] <=> akg[m] + val[m]	(ATEG_06808)	AA:Valine, leucine and isoleucine biosynthesis:Valine, leucine and isoleucine degradation;CV:Pantothenate and CoA biosynthesis	2.6.1.42
r0215	branched-chain-amino-acid transaminase	glu[c] + oival[c] <=> akg[c] + val[c]	(ATEG_04478) or (ATEG_04923) or (ATEG_10023)	AA:Valine, leucine and isoleucine biosynthesis:Valine, leucine and isoleucine degradation;CV:Pantothenate and CoA biosynthesis	2.6.1.42
r0216	2-isopropylmalate synthase:3-isopropylmalate dehydratase	h2o[m] + accoa[m] + oival[m] -> h[m] + coa[m] + ippmal[m]	(ATEG_00848) or (ATEG_00906) or (ATEG_01450)	AA:Valine, leucine and isoleucine biosynthesis;CM:Pyruvate metabolism	2.3.3.13:4.2.1.33
r0217	methylglutaconyl-CoA hydratase	h2o[m] + mgcoa[m] -> hmgcoa[m]	(ATEG_04684)	AA:Valine, leucine and isoleucine degradation	4.2.1.18
r0218	Acyl-CoA dehydrogenase	h[m] + fad[m] + isocoa[m] -> fadh2[m] + maclcoa[m]	(ATEG_00864)	AA:Valine, leucine and isoleucine degradation	1.3.99.12
r0219	acetyl-CoA acyltransferase	coa[m] + mcecoa[m] -> accoa[m] + ppacoa[m]	(ATEG_03795) or (ATEG_00456) or (ATEG_04288) or (ATEG_03980) or (ATEG_01444)	AA:Valine, leucine and isoleucine degradation	2.3.1.16
r0220	Acyl-CoA dehydrogenase	h[m] + fad[m] + mbcoa[m] -> fadh2[m] + mcrocoa[m]	(ATEG_00864)	AA:Valine, leucine and isoleucine degradation	1.3.99.12
r0221	3-hydroxyisobutyrate dehydrogenase	nad[c] + hyisorate[c] <=> h[c] + nadh[c] + mmshy[c]	(ATEG_08501) or (ATEG_07590)	AA:Valine, leucine and isoleucine degradation	1.1.1.31
r0222	3-oxoacid CoA-transferase	succoa[m] + acact[m] <=> succ[m] + aaccoa[m]	(ATEG_03296) or (ATEG_02859) or (ATEG_03794)	AA:Valine, leucine and isoleucine degradation	2.8.3.5
r0223	2-oxoisovalerate dehydrogenase complex	nad[m] + coa[m] + oival[m] -> co2[m] + nadh[m] + isocoa[m]	(ATEG_06635 and ATEG_09087 and ATEG_05705 and ATEG_03862)	AA:Valine, leucine and isoleucine degradation	1.2.4.4:1.8.1.4:2.3.1.168
r0224	Methylcrotonoyl-CoA carboxylase	atp[m] + mcrcoa[m] + hco3[m] -> h[m] + pi[m] + adp[m] + mgcoa[m]	(ATEG_06576 and ATEG_06573)	AA:Valine, leucine and isoleucine degradation	6.4.1.4
r0225	2-oxoisovalerate dehydrogenase complex	nad[m] + coa[m] + omval[m] -> co2[m] + nadh[m] + mbcoa[m]	(ATEG_06635 and ATEG_09087 and ATEG_05705 and ATEG_03862)	AA:Valine, leucine and isoleucine degradation	1.2.4.4:1.8.1.4:2.3.1.168
r0226	2-oxoisovalerate dehydrogenase complex	nad[m] + coa[m] + 4mop[m] -> co2[m] + nadh[m] + ivacoa[m]	(ATEG_06635 and ATEG_09087 and ATEG_05705 and ATEG_03862)	AA:Valine, leucine and isoleucine degradation	1.2.4.4:1.8.1.4:2.3.1.168
r0227	Isovaleryl-CoA dehydrogenase	h[m] + fad[m] + ivacoa[m] -> fadh2[m] + mcrcoa[m]	(ATEG_06574)	AA:Valine, leucine and isoleucine degradation	1.3.8.4
r0228	Acetolactate synthase	pyr[m] + h[m] + obut[m] -> co2[m] + abut[m]	(ATEG_05490 and ATEG_03068) or (ATEG_08346 and ATEG_03068) or (ATEG_08346) or (ATEG_03068) or (ATEG_04565) or (ATEG_01344) or (ATEG_08250)	AA:Valine, leucine and isoleucine degradation	2.2.1.6
r0229	Acetolactate synthase	2 pyr[m] + h[m] -> co2[m] + aclac[m]	(ATEG_05490 and ATEG_03068) or (ATEG_08346 and ATEG_03068) or (ATEG_04565) or (ATEG_08346)	AA:Valine, leucine and isoleucine degradation	2.2.1.6
r0230	3-hydroxyisobutyrate dehydrogenase	nad[m] + hyisorate[m] <=> h[m] + nadh[m] + mmshy[m]	(ATEG_05062) or (ATEG_10002) or (ATEG_01418)	AA:Valine, leucine and isoleucine degradation	1.1.1.31
r0231	3-hydroxyisobutyryl-CoA hydrolase	h2o[m] + hyisocoa[m] -> h[m] + coa[m] + hyisorate[m]	(ATEG_01986)	AA:Valine, leucine and isoleucine degradation	3.1.2.4
r0232	3-hydroxyacyl-CoA dehydrogenase	nad[m] + metbycoa[m] <=> h[m] + nadh[m] + mcecoa[m]	(ATEG_01833) or (ATEG_06720) or (ATEG_10262 and ATEG_01140 and ATEG_01833) or (ATEG_10262 and ATEG_00943)	AA:Valine, leucine and isoleucine degradation	1.1.1.35
r0233	Hydroxymethylglutaryl-CoA lyase	hmgcoa[m] -> accoa[m] + acact[m]	(ATEG_01184) or (ATEG_01803)	AA:Valine, leucine and isoleucine degradation	4.1.3.4
r0234	Enoyl-CoA hydratase	h2o[m] + maclcoa[m] -> hyisocoa[m]	(ATEG_01509) or (ATEG_04903) or (ATEG_05791)	AA:Valine, leucine and isoleucine degradation	4.2.1.17
r0235	Enoyl-CoA hydratase	h2o[m] + mcrocoa[m] -> metbycoa[m]	(ATEG_01509) or (ATEG_04903) or (ATEG_05791)	AA:Valine, leucine and isoleucine degradation	4.2.1.17
r0236	acetyl-CoA C-acetyltransferase	coa[c] + aaccoa[c] <=> 2 accoa[c]	(ATEG_00012)	AA;CM:Propanoate metabolism;LM	2.3.1.9
r0237	acetyl-CoA C-acetyltransferase	coa[m] + aaccoa[m] <=> 2 accoa[m]	(ATEG_00012) or (ATEG_00930)	AA;CM;LM	2.3.1.9
r0238	Alcohol dehydrogenase	nad[c] + meth[c] <=> h[c] + nadh[c] + fald[c]	(ATEG_04319) or (ATEG_04976) or (ATEG_09407) or (ATEG_01304) or (ATEG_01481) or (ATEG_03120) or (ATEG_05380) or (ATEG_07023) or (ATEG_06043) or (ATEG_05407) or (ATEG_07318)	AA;CM;LM;CV	1.1.1.1
Biomass	Biomass deduced	71.4 h2o[c] + 0.14613 asp[c] + 0.15371 glu[c] + 0.22294 ala[c] + 0.17484 gly[c] + 0.10126 gln[c] + 71.4 atp[c] + 0.08887 asn[c] + 0.15713 pro[c] + 0.03297 cys[c] + 0.16063 arg[c] + 0.05566 met[c] + 0.2067 ser[c] + 0.03822 trp[c] + 0.15021 thr[c] + 0.06317 his[c] + 0.09533 phe[c] + 0.07351 tyr[c] + 0.26575 chit[c] + 0.02795 utp[c] + 0.3348 mnt[c] + 0.03051 gtp[c] + 0.0015 glycogen[c] + 0.90068 13g…		Biomass formation
r0239	6-methylsalicylic acid synthase (Artificial reaction, chlor left out)	3 h[c] + 4 accoa[c] + phe[c] + malcoa[c] -> 3 h2o[c] + 5 coa[c] + ota[c]	(ATEG_06275)	Biosynthesis of Other Secondary Metabolites	2.3.1.165
r0240	6-methylsalicylic acid synthase	3 h[c] + nadph[c] + accoa[c] + 3 malcoa[c] -> h2o[c] + 3 co2[c] + nadp[c] + 4 coa[c] + msali[c]	(ATEG_06275)	Biosynthesis of Other Secondary Metabolites	2.3.1.165
r0241	Beta-glucosidase	h2o[e] + cellob[e] -> 2 dglc[e]	(ATEG_05106) or (ATEG_07383) or (ATEG_09052) or (ATEG_02713) or (ATEG_02806) or (ATEG_07931) or (ATEG_10274) or (ATEG_10320) or (ATEG_03047) or (ATEG_06617) or (ATEG_07121) or (ATEG_07419) or (ATEG_02657) or (ATEG_07755)	CM	3.2.1.21	(Workman and Day, 1982)
r0242	oxaloacetase	h2o[c] + oa[c] -> h[c] + ac[c] + oxal[c]	(ATEG_08912) or (ATEG_09284) or (ATEG_09508) or (ATEG_09332)	CM	3.7.1.1
r0243	chitosanase	3 h[e] + chito[e] -> glua[e]	(ATEG_01669)	CM:Amino sugar and nucleotide sugar metabolism	3.2.1.132
r0244	Glucosamine 6-phosphate N-acetyltransferase	accoa[c] + ga6p[c] -> h[c] + coa[c] + nag6p[c]	(ATEG_07206)	CM:Amino sugar and nucleotide sugar metabolism	2.3.1.4
r0245	Glucosamine 6-phosphate N-acetyltransferase	accoa[m] + ga6p[m] -> h[m] + coa[m] + nag6p[m]	(ATEG_07206)	CM:Amino sugar and nucleotide sugar metabolism	2.3.1.4
r0246	Glucosamine-6-phosphate deaminase	h2o[c] + ga6p[c] -> nh3[c] + f6p[c]	(ATEG_00019)	CM:Amino sugar and nucleotide sugar metabolism	3.5.99.6
r0247	chitin synthase	udpnag[c] -> udp[c] + chit[c]	(ATEG_03503) or (ATEG_07926) or (ATEG_05738) or (ATEG_10118) or (ATEG_00451) or (ATEG_01318) or (ATEG_01319) or (ATEG_07757)	CM:Amino sugar and nucleotide sugar metabolism	2.4.1.16
r0248	UDP-N-acetylglucosamine diphosphorylase	utp[c] + naga1p[c] <=> ppi[c] + udpnag[c]	(ATEG_01851)	CM:Amino sugar and nucleotide sugar metabolism	2.7.7.23
r0249	Phosphoacetylglucosamine mutase	naga1p[c] <=> nag6p[c]	(ATEG_02989)	CM:Amino sugar and nucleotide sugar metabolism	5.4.2.3
r0250	hexokinase	atp[c] + glcn[c] -> h[c] + adp[c] + ga6p[c]	(ATEG_06781) or (ATEG_04284) or (ATEG_02444)	CM:Amino sugar and nucleotide sugar metabolism	2.7.1.1
r0251	Chitinase	h2o[c] + chit[c] -> nag[c]	(ATEG_01944) or (ATEG_03374) or (ATEG_04660) or (ATEG_08600) or (ATEG_01756) or (ATEG_08034) or (ATEG_02210) or (ATEG_06269) or (ATEG_06463) or (ATEG_07072) or (ATEG_07291) or (ATEG_07444) or (ATEG_08590) or (ATEG_08022)	CM:Amino sugar and nucleotide sugar metabolism	3.2.1.14
r0252	N-acetylglucosamine deacetylase	h2o[c] + nag[c] -> ac[c] + glcn[c]	(ATEG_02485) or (ATEG_02486) or (ATEG_07736)	CM:Amino sugar and nucleotide sugar metabolism	3.5.1.33
r0253	Chitin deacetylase	4 h2o[e] + 3 chit[e] -> 3 h[e] + chito[e] + 3 ac[e]	(ATEG_00749)	CM:Amino sugar and nucleotide sugar metabolism	3.5.1.41
r0254	beta-N-acetylhexosaminidase	h2o[c] + chib[c] -> 2 nag[c]	(ATEG_00018) or (ATEG_04729)	CM:Amino sugar and nucleotide sugar metabolism	3.2.1.52
r0255	beta-N-acetylhexosaminidase	h2o[e] + chib[e] -> 2 nag[e]	(ATEG_00123)	CM:Amino sugar and nucleotide sugar metabolism	3.2.1.52
r0256	Glutamine-fructose-6-phosphate transaminase (isomerizing)	gln[c] + f6p[c] -> glu[c] + ga6p[c]	(ATEG_07404)	CM:Amino sugar and nucleotide sugar metabolism;AA:Alanine, aspartate and glutamate metabolism	2.6.1.16
r0257	alpha-N-arabinofuranosidase;Alpha-L-arabinofuranosidase	3 h2o[e] + arabin[e] -> 3 larab[e]	(ATEG_07939) or (ATEG_02882) or (ATEG_03540) or (ATEG_07868) or (ATEG_06306) or (ATEG_01562) or (ATEG_03520) or (ATEG_03688) or (ATEG_01407) or (ATEG_00198) or (ATEG_10379) or (ATEG_10071)	CM:Amino sugar and nucleotide sugar metabolism;NM:Purine metabolism	3.2.1.55
r0258	glucarate dehydratase	gcar[c] <=> h2o[c] + 54gcar[c]	(ATEG_09038)	CM:Ascorbate and aldarate metabolism	4.2.1.40
r0259	glucarate dehydratase	gcar[c] <=> h2o[c] + 23gcar[c]	(ATEG_09038)	CM:Ascorbate and aldarate metabolism	4.2.1.40
r0260	Acetoacetyl-CoA synthase	atp[c] + coa[c] + acact[c] -> h[c] + amp[c] + ppi[c] + aaccoa[c]	(ATEG_00387) or (ATEG_00100)	CM:Butanoate metabolism	6.2.1.16
r0261	Acyl-CoA dehydrogenase	5 h[m] + fad[m] + cronylcoa[m] -> fadh2[m] + c40coa[m]	(ATEG_00864)	CM:Butanoate metabolism	1.3.8.1
r0262	cis-aconitic decarboxylase	h[c] + aco[c] <=> co2[c] + ia[c]	(ATEG_09971) or (ATEG_08909)	CM:C5-Branched dibasic acid metabolism	4.1.1.6
r0263	ATP citrate synthase	coa[m] + atp[m] + cit[m] -> oa[m] + pi[m] + accoa[m] + adp[m]	(ATEG_02375)	CM:Citrate cycle	2.3.3.8
r0264	Isocitrate dehydrogenase (NADP+)	nadp[m] + icit[m] -> akg[m] + nadph[m] + co2[m]	(ATEG_01603)	CM:Citrate cycle	1.1.1.42
r0265	Isocitrate dehydrogenase (NAD+)	nad[m] + icit[m] -> akg[m] + nadh[m] + co2[m]	(ATEG_07408 and ATEG_00467)	CM:Citrate cycle	1.1.1.41
r0266	citrate (pro-3S)-lyase	cit[m] -> oa[m] + ac[m]	(ATEG_03186)	CM:Citrate cycle	4.1.3.6
r0267	Fumarate hydratase	h2o[m] + fum[m] <=> mal[m]	(ATEG_07205)	CM:Citrate cycle	4.2.1.2
r0268	Malate dehydrogenase	nad[c] + mal[c] <=> oa[c] + h[c] + nadh[c]	(ATEG_05653) or (ATEG_06358)	CM:Citrate cycle:Glyoxylate and dicarboxylate metabolism	1.1.1.37
r0269	Aconitate hydratase	cit[m] <=> h2o[m] + aco[m]	(ATEG_02937) or (ATEG_03325)	CM:Citrate cycle:Glyoxylate and dicarboxylate metabolism	4.2.1.3
r0270	Aconitate hydratase	h2o[m] + aco[m] <=> icit[m]	(ATEG_02937) or (ATEG_03325)	CM:Citrate cycle:Glyoxylate and dicarboxylate metabolism	4.2.1.3
r0271	Malate dehydrogenase	nad[m] + mal[m] <=> oa[m] + h[m] + nadh[m]	(ATEG_05653) or (ATEG_06358)	CM:Citrate cycle:Glyoxylate and dicarboxylate metabolism	1.1.1.37
r0272	Succinate-CoA ligase (ADP-forming)	succ[m] + coa[m] + atp[m] <=> pi[m] + adp[m] + succoa[m]	(ATEG_00275 and ATEG_09415 and ATEG_02744) or (ATEG_08900)	CM:Citrate cycle:Glyoxylate and dicarboxylate metabolism	6.2.1.5
r0273	2-Oxoglutarate dehydrogenase complex	akg[m] + nad[m] + coa[m] -> nadh[m] + co2[m] + succoa[m]	(ATEG_03911 and ATEG_09529) or (ATEG_09529 and ATEG_09000 and ATEG_05705)	CM:Citrate cycle:Glyoxylate and dicarboxylate metabolism	1.2.4.2:1.8.1.4:2.3.1.61
r0274	Succinate dehydrogenase	fadh2[m] + fum[m] -> h[m] + succ[m] + fad[m]	(ATEG_01694 and ATEG_05235)	CM:Citrate cycle;EM:Oxidative phosphorylation	1.3.99.1
r0275	Succinate dehydrogenase	fadh2[m] + fum[c] -> h[c] + succ[c] + fad[m]	(ATEG_01694 and ATEG_05235)	CM:Citrate cycle;EM:Oxidative phosphorylation	1.3.99.1
r0276	Succinate dehydrogenase (ubiquinone)	succ[m] + q[m] <=> fum[m] + qh2[m]	(ATEG_07592 and ATEG_06480 and ATEG_05235) or (ATEG_06343 and ATEG_07592) or (ATEG_00779) or (ATEG_07743) or (ATEG_08708)	CM:Citrate cycle;EM:Oxidative phosphorylation	1.3.5.1
r0277	phosphopyruvate hydratase	2pg[c] <=> h2o[c] + pep[c]	(ATEG_02902)	CM:EMP Pathway	4.2.1.11
r0278	Fructose-bisphosphate aldolase	f16p[c] <=> t3p1[c] + t3p2[c]	(ATEG_04703) or (ATEG_07591)	CM:EMP Pathway	4.1.2.13
r0279	glyceraldehyde-3-phosphate dehydrogenase	pi[c] + nad[c] + t3p1[c] <=> h[c] + nadh[c] + 13pdg[c]	(ATEG_09817) or (ATEG_10199)	CM:EMP Pathway	1.2.1.12
r0280	glucokinase	atp[c] + dglc[c] -> h[c] + adp[c] + dg6p[c]	(ATEG_07225)	CM:emp pathway	2.7.1.2
r0281	Glucose-6-phosphate isomerase	dg6p[c] <=> f6p[c]	(ATEG_04409)	CM:EMP Pathway	5.3.1.9
r0282	Phosphoglycerate kinase	adp[c] + 13pdg[c] <=> atp[c] + 3pg[c]	(ATEG_00224)	CM:EMP Pathway	2.7.2.3
r0283	Phosphoglycerate mutase	3pg[c] <=> 2pg[c]	(ATEG_01547) or (ATEG_07196) or (ATEG_02703)	CM:EMP Pathway	5.4.2.1
r0284	fructose-bisphosphatase	h2o[c] + f16p[c] -> pi[c] + f6p[c]	(ATEG_03949)	CM:EMP Pathway	3.1.3.11
r0285	phosphoenolpyruvate carboxykinase	oa[c] + atp[c] -> co2[c] + adp[c] + pep[c]	(ATEG_05895)	CM:EMP Pathway	4.1.1.49
r0286	Glucose-6-phosphate isomerase	adg6p[c] <=> f6p[c]	(ATEG_04409)	CM:EMP Pathway	5.3.1.9
r0287	Glucose-6-phosphate isomerase	adg6p[c] <=> bdg6p[c]	(ATEG_04409)	CM:EMP Pathway	5.3.1.9
r0288	6-phosphofructokinase;pfk	atp[c] + f6p[c] -> h[c] + adp[c] + f16p[c]	(ATEG_07646 and ATEG_07332)	CM:EMP Pathway:Pentose phosphate pathway:Fructose and mannose metabolism	2.7.1.11
r0289	6-phosphofructokinase	atp[m] + f6p[m] -> h[m] + adp[m] + f16p[m]	(ATEG_07646 and ATEG_07332)	CM:EMP Pathway:Pentose phosphate pathway:Fructose and mannose metabolism	2.7.1.11
r0290	Mannitol-1-phosphatase	h2o[c] + mnt1p[c] -> pi[c] + mnt[c]		CM:Fructose and mannose metabolism	3.1.3.22
r0291	D-Sorbitol dehydrogenase (acceptor)	h[c] + nadh[c] + sor[c] -> nad[c] + sot[c]	(ATEG_05176) or (ATEG_06456) or (ATEG_09082) or (ATEG_00639)	CM:Fructose and mannose metabolism	1.1.99.21
r0292	UDP-glucose glycoprotein glucosyltransferase	gdpman[c] -> gdp[c] + mannan[c]	(ATEG_04945) or (ATEG_00990)	CM:Fructose and mannose metabolism	2.4.1.-
r0293	L-Iditol 2-dehydrogenase	nad[c] + idol[c] -> h[c] + nadh[c] + sor[c]	(ATEG_01882) or (ATEG_02679) or (ATEG_09838) or (ATEG_05176) or (ATEG_06456)	CM:Fructose and mannose metabolism	1.1.1.14
r0294	mannan endo-1,4-beta-mannosidase	h2o[c] + 14mnan[c] -> man[c]	(ATEG_02669) or (ATEG_08654)	CM:Fructose and mannose metabolism	3.2.1.78
r0295	Mannitol-1-phosphate 5-dehydrogenase	nad[c] + mnt1p[c] <=> h[c] + nadh[c] + f6p[c]	(ATEG_01508)	CM:Fructose and mannose metabolism	1.1.1.17
r0296	hexokinase	atp[c] + man[c] -> h[c] + adp[c] + man6p[c]	(ATEG_06781) or (ATEG_04284) or (ATEG_02444)	CM:Fructose and mannose metabolism	2.7.1.1
r0297	hexokinase	atp[c] + dfru[c] -> h[c] + adp[c] + f6p[c]	(ATEG_06781) or (ATEG_04284) or (ATEG_02444)	CM:Fructose and mannose metabolism	2.7.1.1
r0298	6-phosphofructo-2-kinase	atp[c] + f6p[c] -> h[c] + adp[c] + f26p[c]	(ATEG_06352) or (ATEG_06353) or (ATEG_06355) or (ATEG_05665) or (ATEG_05666) or (ATEG_10151)	CM:Fructose and mannose metabolism	2.7.1.105
r0299	Mannose-1-phosphate guanylyltransferase	gtp[c] + man1p[c] -> ppi[c] + gdpman[c]	(ATEG_05908) or (ATEG_03931)	CM:Fructose and mannose metabolism	2.7.7.13
r0300	fructose-2,6-bisphosphate 2-phosphatase	h2o[c] + f26p[c] -> pi[c] + f6p[c]	(ATEG_06352) or (ATEG_06353) or (ATEG_06355) or (ATEG_05665) or (ATEG_05666)	CM:Fructose and mannose metabolism	3.1.3.46
r0301	mannitol 2-dehydrogenase	h[c] + nadh[c] + dfru[c] <=> nad[c] + mnt[c]	(ATEG_01190)	CM:Fructose and mannose metabolism	1.1.1.67
r0302	Mannose-6-phosphate isomerase	man6p[c] <=> f6p[c]	(ATEG_00529) or (ATEG_05356)	CM:Fructose and mannose metabolism	5.3.1.8
r0303	Phosphomannomutase	man1p[c] <=> man6p[c]	(ATEG_05704) or (ATEG_07437)	CM:Fructose and mannose metabolism	5.4.2.8
r0304	triosephosphate isomerase (TIM)	t3p2[c] <=> t3p1[c]	(ATEG_06163)	CM:Fructose and mannose metabolism;CM:Inositol phosphate metabolism;CM:Glycolysis / Gluconeogenesis;EM	5.3.1.1
r0305	Beta-galactosidase	h2o[e] + epm[e] <=> gal[e] + man[e]	(ATEG_00616)	CM:Galactose metabolism	3.2.1.22
r0306	Beta-galactosidase	h2o[e] + 1dgali[e] <=> gal[e] + ins[e]	(ATEG_00616)	CM:Galactose metabolism	3.2.1.22
r0307	Beta-galactosidase	h2o[e] + ggl[e] <=> gal[e] + gl[e]	(ATEG_00616)	CM:Galactose metabolism	3.2.1.22
r0308	Beta-galactosidase	h2o[e] + melt[e] <=> gal[e] + sot[e]	(ATEG_00616)	CM:Galactose metabolism	3.2.1.22
r0309	Beta-fructofuranosidase	2 h2o[e] + stac[e] -> gal[e] + dfru[e] + meli[e]	(ATEG_08155) or (ATEG_10253) or (ATEG_05860)	CM:Galactose metabolism	3.2.1.26
r0310	aldehyde reductase	h[c] + nadph[c] + gal[c] <=> nadp[c] + gali[c]	(ATEG_06997) or (ATEG_05382) or (ATEG_04185) or (ATEG_04455) or (ATEG_02504) or (ATEG_05513)	CM:Galactose metabolism	1.1.1.21
r0311	2-dehydro-3-deoxygalactonokinase:2-dehydro-3-deoxyphosphogalactonate aldolase	atp[c] + 2d3dgalt[c] -> pyr[c] + h[c] + adp[c] + t3p1[c]	(ATEG_03078) or (ATEG_06027)	CM:Galactose metabolism	4.1.2.21	(Elshafei and Abdel-Fatah, 1991)
r0312	Galactose oxidase	h2o[c] + o2[c] + gal[c] -> h2o2[c] + h[c] + galnt[c]	(ATEG_06260)	CM:Galactose metabolism	1.1.3.9
r0313	Galactokinase	atp[c] + gal[c] -> h[c] + adp[c] + gal1p[c]	(ATEG_04562)	CM:Galactose metabolism	2.7.1.6
r0314	UTP-hexose-1-phosphate uridylyltransferase	utp[c] + gal1p[c] -> ppi[c] + udpgal[c]	(ATEG_01422)	CM:Galactose metabolism	2.7.7.10
r0315	UDP-glucose-hexose-1-phosphate uridylyltransferase	udpgal[c] + g1p[c] <=> gal1p[c] + udpg[c]	(ATEG_01422)	CM:Galactose metabolism	2.7.7.12
r0316	Alpha-galactosidase	h2o[c] + meli[c] -> gal[c] + dglc[c]	(ATEG_07935)	CM:Galactose metabolism	3.2.1.22
r0317	Beta-galactosidase	h2o[c] + lact[c] -> gal[c] + dglc[c]	(ATEG_07446) or (ATEG_00712) or (ATEG_04784) or (ATEG_10243)	CM:Galactose metabolism	3.2.1.23
r0318	Beta-galactosidase	h2o[e] + lact[e] -> dglc[e] + gal[e]	(ATEG_05131) or (ATEG_00616) or (ATEG_07446)	CM:Galactose metabolism	3.2.1.23
r0319	Beta-fructofuranosidase	h2o[e] + raff[e] -> dfru[e] + meli[e]	(ATEG_08155) or (ATEG_10253) or (ATEG_05860)	CM:Galactose metabolism	3.2.1.26
r0320	Galactonate dehydratase	galnt[c] -> h2o[c] + 2d3dgalt[c]	(ATEG_03078) or (ATEG_06027)	CM:Galactose metabolism	4.2.1.6	(Elshafei and Abdel-Fatah, 1991)
r0321	UDP-glucose 4-epimerase	udpgal[c] <=> udpg[c]	(ATEG_00624) or (ATEG_04119) or (ATEG_01678) or (ATEG_07631)	CM:Galactose metabolism	5.1.3.2
r0322	Phosphoglucomutase	g1p[c] <=> dg6p[c]	(ATEG_04724)	CM:Galactose metabolism	5.4.2.2
r0323	Alpha-galactosidase	h2o[e] + meli[e] -> dglc[e] + gal[e]	(ATEG_02312) or (ATEG_07929) or (ATEG_01905) or (ATEG_09830) or (ATEG_04382) or (ATEG_02160)	CM:Galactose metabolism	3.2.1.22
r0324	Alpha-galactosidase	h2o[e] + stac[e] <=> gal[e] + raff[e]	(ATEG_02312) or (ATEG_07929) or (ATEG_01905) or (ATEG_09830) or (ATEG_04382) or (ATEG_02160) or (ATEG_03427)	CM:Galactose metabolism	3.2.1.22
r0325	Alpha-galactosidase	h2o[e] + raff[e] <=> gal[e] + suc[e]	(ATEG_02312) or (ATEG_07929) or (ATEG_01905) or (ATEG_09830) or (ATEG_04382) or (ATEG_02160)	CM:Galactose metabolism	3.2.1.22
r0326	Alpha-glucosidase	h2o[e] + suc[e] -> dglc[e] + dfru[e]	(ATEG_00723) or (ATEG_08278) or (ATEG_08472) or (ATEG_05177) or (ATEG_08059) or (ATEG_08065)	CM:Galactose metabolism:Starch and sucrose metabolism	3.2.1.20
r0327	Alcohol dehydrogenase	nad[c] + eth[c] <=> h[c] + nadh[c] + acal[c]	(ATEG_05407) or (ATEG_04319) or (ATEG_04976) or (ATEG_09407) or (ATEG_01304) or (ATEG_01481) or (ATEG_03120) or (ATEG_05380) or (ATEG_07023) or (ATEG_06043) or (ATEG_07317) or (ATEG_09053) or (ATEG_07062) or (ATEG_03722) or (ATEG_02615)	CM:Glycolysis / Gluconeogenesis	1.1.1.1
r0328	Alcohol dehydrogenase (NADP+)	nadp[c] + eth[c] -> h[c] + nadph[c] + acal[c]	(ATEG_04734) or (ATEG_06997) or (ATEG_04185) or (ATEG_04455) or (ATEG_05382) or (ATEG_05513) or (ATEG_01574) or (ATEG_01826) or (ATEG_07900)	CM:Glycolysis / Gluconeogenesis	1.1.1.2
r0329	Alcohol dehydrogenase	nad[m] + eth[m] <=> h[m] + nadh[m] + acal[m]	(ATEG_05407) or (ATEG_04319) or (ATEG_04976) or (ATEG_09407) or (ATEG_01304) or (ATEG_01481) or (ATEG_03120) or (ATEG_05380) or (ATEG_07023) or (ATEG_06043) or (ATEG_07317) or (ATEG_09053) or (ATEG_07062) or (ATEG_03722) or (ATEG_02615)	CM:Glycolysis / Gluconeogenesis	1.1.1.1
r0330	Aldose 1-epimerase	bdglc[c] <=> adglc[c]	(ATEG_04085) or (ATEG_08473) or (ATEG_08962) or (ATEG_05292)	CM:Glycolysis / Gluconeogenesis	5.1.3.3
r0331	Aldose 1-epimerase	gal[c] <=> bgal[c]	(ATEG_04085) or (ATEG_08473) or (ATEG_08962)	CM:Glycolysis / Gluconeogenesis	5.1.3.3
r0332	Aldose 1-epimerase	larab[c] <=> arab[c]	(ATEG_04085) or (ATEG_08473) or (ATEG_08962)	CM:Glycolysis / Gluconeogenesis	5.1.3.3
r0333	Aldose 1-epimerase	dfru[c] <=> bdfru[c]	(ATEG_04085) or (ATEG_08473) or (ATEG_08962)	CM:Glycolysis / Gluconeogenesis	5.1.3.3
r0334	pyruvate kinase	h[c] + adp[c] + pep[c] -> pyr[c] + atp[c]	(ATEG_03685)	CM:Glycolysis / Gluconeogenesis:Pyruvate metabolism	2.7.1.40
r0335	aldehyde dehydrogenase (NAD+)	h2o[m] + nad[m] + acal[m] -> 2 h[m] + nadh[m] + ac[m]	(ATEG_03231) or (ATEG_03101) or (ATEG_05020) or (ATEG_05338) or (ATEG_08120) or (ATEG_08300) or (ATEG_07393) or (ATEG_02178)	CM:Glycolysis / Gluconeogenesis:Pyruvate metabolism	1.2.1.3
r0336	L-lactate dehydrogenase	nad[c] + llac[c] -> pyr[c] + h[c] + nadh[c]	(ATEG_02218) or (ATEG_05509) or (ATEG_07183)	CM:Glycolysis / Gluconeogenesis:Pyruvate metabolism	1.1.1.27
r0337	aldehyde dehydrogenase (NAD+)	h2o[c] + nad[c] + acal[c] -> 2 h[c] + nadh[c] + ac[c]	(ATEG_03231) or (ATEG_03101) or (ATEG_05020) or (ATEG_05338) or (ATEG_08120) or (ATEG_08300) or (ATEG_07393) or (ATEG_02178)	CM:Glycolysis / Gluconeogenesis;CM:Pyruvate metabolism	1.2.1.3
r0338	acetyl-CoA synthetase	ac[m] + coa[m] + atp[m] -> h[m] + accoa[m] + ppi[m] + amp[m]	(ATEG_05989)	CM:Glycolysis/Gluconeogenesis:Pyruvate metabolism:Propanoate metabolism;	6.2.1.1
r0339	acetyl-CoA synthetase	atp[c] + coa[c] + ac[c] -> h[c] + amp[c] + ppi[c] + accoa[c]	(ATEG_00812) or (ATEG_03970) or (ATEG_09623)	CM:Glycolysis/Gluconeogenesis;CM:Pyruvate metabolism;CM:Propanoate metabolism;	6.2.1.1
r0340	(S)-2-hydroxy-acid oxidase	o2[m] + glya[m] -> h2o2[m] + glx[m]	(ATEG_05195) or (ATEG_08297)	CM:Glyoxylate and dicarboxylate metabolism	1.1.3.15
r0341	glycerate dehydrogenase	nad[c] + glya[c] <=> glx[c] + h[c] + nadh[c]	(ATEG_00574) or (ATEG_05943)	CM:Glyoxylate and dicarboxylate metabolism	1.1.1.29
r0342	phosphoglycolate phosphatase	h2o[c] + pglya[c] -> pi[c] + glya[c]	(ATEG_07773)	CM:Glyoxylate and dicarboxylate metabolism	3.1.3.18
r0343	(S)-2-hydroxy-acid oxidase	o2[c] + glya[c] -> h2o2[c] + glx[c]	(ATEG_08297)	CM:Glyoxylate and dicarboxylate metabolism	1.1.3.15
r0344	glycerate dehydrogenase	h[c] + nadh[c] + 3hpyr[c] <=> nad[c] + g[c]	(ATEG_00574) or (ATEG_05943)	CM:Glyoxylate and dicarboxylate metabolism	1.1.1.29
r0345	Oxalate decarboxylase	h[c] + oxal[c] -> co2[c] + for[c]	(ATEG_07804)	CM:Glyoxylate and dicarboxylate metabolism	4.1.1.2
r0346	Isocitrate lyase	icit[m] -> succ[m] + glx[m]	(ATEG_07163)	CM:Glyoxylate and dicarboxylate metabolism	4.1.3.1
r0347	glycerate kinase	atp[c] + g[c] -> h[c] + adp[c] + 3pg[c]	(ATEG_04907)	CM:Glyoxylate and dicarboxylate metabolism;AA:Glycine, serine and threonine metabolism;EM:Methane metabolism;LM	2.7.1.31
r0348	citrate synthase	h2o[m] + oa[m] + accoa[m] -> h[m] + coa[m] + cit[m]	(ATEG_07119) or (ATEG_07990) or (ATEG_07882) or (ATEG_05030)	CM:Glyoxylate and dicarboxylate metabolism;CM:Citrate cycle	2.3.3.1
r0349	citrate synthase	h2o[c] + oa[c] + accoa[c] -> h[c] + coa[c] + cit[c]	(ATEG_07119) or (ATEG_07990) or (ATEG_07882) or (ATEG_05030)	CM:Glyoxylate and dicarboxylate metabolism;CM:Citrate cycle	2.3.3.1
r0350	formate dehydrogenase	nad[m] + for[m] -> nadh[m] + co2[m]	(ATEG_05685)	CM:Glyoxylate and dicarboxylate metabolism;EM:Methane metabolism	1.2.1.2
r0351	inositol-polyphosphate multikinase	atp[c] + i4p[c] -> h[c] + adp[c] + i5p[c]	(ATEG_02125)	CM:Inositol phosphate metabolism	2.7.1.151
r0352	malonate-semialdehyde dehydrogenase	oppa[m] + nad[m] + coa[m] -> nadh[m] + co2[m] + accoa[m]	(ATEG_03167)	CM:Inositol phosphate metabolism	1.2.1.18
r0353	1-phosphatidylinositol-3-phosphate 5-kinase	atp[c] + h[c] + pinsp[c] -> adp[c] + pyi35bp[c]	(ATEG_03680)	CM:Inositol phosphate metabolism	2.7.1.150
r0354	myo-inositol 2-dehydrogenase	nad[c] + ins[c] <=> h[c] + nadh[c] + kins[c]	(ATEG_04460) or (ATEG_06710)	CM:Inositol phosphate metabolism	1.1.1.18	KEGG
r0355	inositol-polyphosphate multikinase	atp[c] + tpi[c] -> h[c] + adp[c] + i4p[c]	(ATEG_02125)	CM:Inositol phosphate metabolism	2.7.1.151
r0356	1D-myo-Inositol-1,2-cyclic-phosphate 2-inositolphosphohydrolase;myo-inositol-1(or 4)-monophosphatase	2 h2o[c] + myocypi[c] -> h[c] + pi[c] + ins[c]	(ATEG_04254)	CM:Inositol phosphate metabolism	3.1.4.43;3.1.3.25
r0357	inositol oxygenase	o2[c] + ins[c] -> h2o[c] + h[c] + glcurn[c]	(ATEG_04456)	CM:Inositol phosphate metabolism	1.13.99.1
r0358	Methylmalonate-semialdehyde dehydrogenase	h2o[m] + nad[m] + coa[m] + mmshy[m] -> nadh[m] + h[m] + hco3[m] + ppacoa[m]	(ATEG_03167) or (ATEG_07299)	CM:Inositol phosphate metabolism	1.2.1.27
r0359	phosphatidylinositol 3-kinase	atp[c] + h[c] + pins[c] -> adp[c] + pinsp[c]	(ATEG_05789) or (ATEG_04462) or (ATEG_02002) or (ATEG_02771)	CM:Inositol phosphate metabolism	2.7.1.137
r0360	inositol-phosphate phosphatase	h2o[c] + mi3p[c] -> pi[c] + ins[c]	(ATEG_04254) or (ATEG_10115)	CM:Inositol phosphate metabolism	3.1.3.25
r0361	inositol-polyphosphate 5-phosphatase	h2o[c] + tpi[c] -> pi[c] + myobpi[c]	(ATEG_09169)	CM:Inositol phosphate metabolism	3.1.3.56
r0362	3-phytase	h2o[e] + i6p[e] -> pi[e] + i5p2[e]	(ATEG_05333) or (ATEG_02839)	CM:Inositol phosphate metabolism	3.1.3.8	(Mitchell et al., 1997)
r0363	phosphatidylinositol diacylglycerol-lyase	pins[c] -> h[c] + myocypi[c] + dagly[c]	(ATEG_03863)	CM:Inositol phosphate metabolism	4.6.1.13
r0364	myo-inositol-1(or 4)-monophosphatase	h2o[c] + ip4[c] -> pi[c] + ins[c]	(ATEG_04254)	CM:Inositol phosphate metabolism	3.1.3.25
r0365	myo-inositol-1-phosphate synthase	dg6p[c] <=> mi3p[c]	(ATEG_08137)	CM:Inositol phosphate metabolism	5.5.1.4
r0366	CDP-diacylglycerol-inositol 3-phosphatidyltransferase	ins[c] + cdpdg[c] -> 2 h[c] + pins[c] + cmp[c]	(ATEG_05215)	CM:Inositol phosphate metabolism;LM	2.7.8.11
r0367	2-deoxy-D-gluconate 3-dehydrogenase	nad[c] + 2ddglcn[c] <=> h[c] + nadh[c] + 3d2ddglcn[c]	(ATEG_06026) or (ATEG_00637)	CM:Pentose and glucuronate interconversions	1.1.1.125
r0368	D-Xylose reductase (xyrA) (xylitol dehydrogenase)	h[c] + nadh[c] + xyl[c] <=> nad[c] + xol[c]	(ATEG_02624)	CM:Pentose and glucuronate interconversions	1.1.1.21 307
r0369	D-xylulose reductase	nad[c] + xol[c] -> h[c] + nadh[c] + xul[c]	(ATEG_01882) or (ATEG_02679) or (ATEG_09838) or (ATEG_03379)	CM:Pentose and glucuronate interconversions	1.1.1.9
r0370	L-iditol 2-dehydrogenase	nad[c] + sot[c] -> h[c] + nadh[c] + dfru[c]	(ATEG_05176) or (ATEG_06456) or (ATEG_02679) or (ATEG_09082)	CM:Pentose and glucuronate interconversions	1.1.1.14
r0371	L-iditol 2-dehydrogenase	sot[e] + nad[e] -> h[e] + dfru[e] + nadh[e]	(ATEG_09898)	CM:Pentose and glucuronate interconversions	1.1.1.14
r0372	Formaldehyde dehydrogenase	h2o[c] + nad[c] + fald[c] -> 2 h[c] + nadh[c] + for[c]	(ATEG_04947) or (ATEG_08139)	CM:Pentose and glucuronate interconversions	1.2.1.46
r0373	L-Arabinitol 4-dehydrogenase	nad[c] + laol[c] <=> h[c] + nadh[c] + lxul[c]	(ATEG_05176) or (ATEG_06456)	CM:Pentose and glucuronate interconversions	1.1.1.12
r0374	L-arabinose reductase	h[c] + nadph[c] + larab[c] <=> nadp[c] + laol[c]	(ATEG_00195) or (ATEG_02504) or (ATEG_03892) or (ATEG_04185) or (ATEG_04455) or (ATEG_05382) or (ATEG_05513) or (ATEG_06997) or (ATEG_02624)	CM:Pentose and glucuronate interconversions	1.1.1.21
r0375	D-Xylose reductase (xyrA) (xylitol dehydrogenase)	h[c] + nadph[c] + xyl[c] <=> nadp[c] + xol[c]	(ATEG_02624)	CM:Pentose and glucuronate interconversions	1.1.1.21 307
r0376	Aldehyde reductase	h[c] + nadph[c] + arab[c] -> nadp[c] + aol[c]	(ATEG_03489) or (ATEG_09599)	CM:Pentose and glucuronate interconversions	1.1.1.21
r0377	UDP-glucose 6-dehydrogenase	h2o[c] + 2 nad[c] + udpg[c] -> 3 h[c] + 2 nadh[c] + udpge[c]	(ATEG_00996) or (ATEG_05092)	CM:Pentose and glucuronate interconversions	1.1.1.22
r0378	L-Xylulose reductase	h[c] + nadph[c] + lxul[c] <=> nadp[c] + xol[c]	(ATEG_02405) or (ATEG_02674) or (ATEG_03379) or (ATEG_06511)	CM:Pentose and glucuronate interconversions	1.1.1.10
r0379	Beta-glucuronidase	h2o[c] + glucur[c] -> h[c] + eth[c] + glcurn[c]	(ATEG_04375) or (ATEG_05980) or (ATEG_00724) or (ATEG_03623) or (ATEG_10103) or (ATEG_10255)	CM:Pentose and glucuronate interconversions	3.2.1.31
r0380	ribitol 2-dehydrogenase	nad[c] + ribol[c] -> h[c] + nadh[c] + rl[c]	(ATEG_05407)	CM:Pentose and glucuronate interconversions	1.1.1.56
r0381	ribitol 2-dehydrogenase	nadp[c] + ribol[c] -> h[c] + nadph[c] + rl[c]	(ATEG_05407)	CM:Pentose and glucuronate interconversions	1.1.1.56
r0382	fructuronate reductase	h[c] + nadh[c] + frutn[c] <=> nad[c] + manoe[c]	(ATEG_01190)	CM:Pentose and glucuronate interconversions	1.1.1.57
r0383	D-Ribose reductase	h[c] + nadph[c] + rib[c] <=> nadp[c] + ribol[c]	(ATEG_00195) or (ATEG_02504) or (ATEG_03892) or (ATEG_04185) or (ATEG_04455) or (ATEG_05382) or (ATEG_05513) or (ATEG_06997) or (ATEG_02624)	CM:Pentose and glucuronate interconversions	1.1.1.21
r0384	Phosphoglucomutase	r1p[c] <=> r5p[c]	(ATEG_04724)	CM:Pentose and glucuronate interconversions	5.4.2.2
r0385	xylulokinase	atp[c] + xul[c] -> h[c] + adp[c] + x5p[c]	(ATEG_06472)	CM:Pentose and glucuronate interconversions	2.7.1.17
r0386	UTP-glucose-1-phosphate uridylyltransferase	utp[c] + g1p[c] <=> ppi[c] + udpg[c]	(ATEG_01813)	CM:Pentose and glucuronate interconversions:Amino sugar and nucleotide sugar metabolism:Starch and sucrose metabolism	2.7.7.9
r0387	L-ribulose-5-phosphate 4-epimerase	lrl5p[c] <=> x5p[c]	(ATEG_04501) or (ATEG_09097) or (ATEG_07681)	CM:Pentose and glucuronate interconversions:Ascorbate and aldarate metabolism	5.1.3.4
r0388	Gluconolactonase;lactonase	h2o[e] + g15l[e] -> glcnt[e]	(ATEG_08528) or (ATEG_05336)	CM:Pentose phosphate pathway	3.1.1.17
r0389	ribokinase	h[c] + adp[c] + dor5p[c] <=> atp[c] + doris[c]	(ATEG_09220) or (ATEG_08243)	CM:Pentose phosphate pathway	2.7.1.15
r0390	Gluconokinase	atp[c] + glcnt[c] -> h[c] + adp[c] + d6pgc[c]	(ATEG_05795) or (ATEG_06998) or (ATEG_03860)	CM:Pentose phosphate pathway	2.7.1.12
r0391	Glucose oxidase	o2[e] + dglc[e] <=> h2o2[e] + g15l[e]	(ATEG_08474) or (ATEG_07840) or (ATEG_06246)	CM:Pentose phosphate pathway	1.1.3.4
r0392	Ribokinase	atp[c] + rib[c] -> h[c] + adp[c] + r5p[c]	(ATEG_08243) or (ATEG_09220)	CM:Pentose phosphate pathway	2.7.1.15
r0393	Deoxyribose-phosphate aldolase	dor5p[c] <=> acal[c] + t3p1[c]	(ATEG_06305) or (ATEG_08759)	CM:Pentose phosphate pathway	4.1.2.4
r0394	Transaldolase	t3p1[c] + s7p[c] <=> e4p[c] + f6p[c]	(ATEG_06544) or (ATEG_06479) or (ATEG_04238)	CM:Pentose phosphate pathway	2.2.1.2
r0395	Transketolase	e4p[c] + x5p[c] <=> t3p1[c] + f6p[c]	(ATEG_04606) or (ATEG_07454) or (ATEG_00552) or (ATEG_08856) or (ATEG_09081) or (ATEG_03610)	CM:Pentose phosphate pathway	2.2.1.1	AsperCyc
r0396	Ribose-5-phosphate isomerase	rl5p[c] <=> r5p[c]	(ATEG_02372) or (ATEG_02878) or (ATEG_01476)	CM:Pentose phosphate pathway	5.3.1.6
r0397	6-phosphogluconolactonase	h2o[e] + d6pgl[e] -> h[e] + d6pgc[e]	(ATEG_05964)	CM:Pentose phosphate pathway	3.1.1.31
r0398	Phosphogluconate dehydrogenase (decarboxylating)	nadp[c] + d6pgc[c] -> co2[c] + nadph[c] + rl5p[c]	(ATEG_06619) or (ATEG_06620) or (ATEG_05851)	CM:Pentose phosphate pathway	1.1.1.44
r0399	6-phosphogluconolactonase	h2o[c] + d6pgl[c] -> h[c] + d6pgc[c]	(ATEG_01961)	CM:Pentose phosphate pathway	3.1.1.31
r0400	Transketolase	r5p[c] + x5p[c] <=> t3p1[c] + s7p[c]	(ATEG_04606) or (ATEG_07454) or (ATEG_00552) or (ATEG_08856) or (ATEG_09081) or (ATEG_03610)	CM:Pentose phosphate pathway	2.2.1.1	AsperCyc
r0401	glucose-6-phosphate dehydrogenase	nadp[c] + dg6p[c] -> h[c] + nadph[c] + d6pgl[c]	(ATEG_01623)	CM:Pentose phosphate pathway	1.1.1.49
r0402	Ribulose-phosphate 3-epimerase	rl5p[c] <=> x5p[c]	(ATEG_07872)	CM:Pentose phosphate pathway:Pentose and glucuronate interconversions	5.1.3.1
r0403	Methylisocitrate lyase	2micit[c] <=> pyr[c] + succ[c]	(ATEG_06316)	CM:Propanoate metabolism	4.1.3.30
r0404	malonate-semialdehyde dehydrogenase	oppa[m] + nadp[m] + coa[m] <=> h[m] + nadph[m] + malcoa[m]	(ATEG_03167)	CM:Propanoate metabolism	1.2.1.18
r0405	2-methylisocitrate dehydratase	h2o[m] + 2maco[m] <=> 2micit[m]	(ATEG_01342) or (ATEG_07091)	CM:Propanoate metabolism	4.2.1.99
r0406	2-Methylcitrate synthase	h[m] + coa[m] + 2mcit[m] <=> h2o[m] + oa[m] + ppacoa[m]	(ATEG_07119) or (ATEG_07990)	CM:Propanoate metabolism	2.3.3.5
r0407	Methylisocitrate lyase	2micit[m] <=> pyr[m] + succ[m]	(ATEG_03232) or (ATEG_07163)	CM:Propanoate metabolism	4.1.3.30
r0408	2-Methylcitrate dehydratase	2mcit[m] -> h2o[m] + 2maco[m]	(ATEG_01342) or (ATEG_07091)	CM:Propanoate metabolism	4.2.1.79
r0409	D-lactate dehydrogenase	nad[c] + lac[c] <=> pyr[c] + h[c] + nadh[c]	(ATEG_00159)	CM:Pyruvate metabolism	1.1.1.28
r0410	D-lactate dehydrogenase (cytochrome)	lac[m] + 2 feri[m] -> pyr[m] + 2 fero[m]	(ATEG_01883) or (ATEG_08738)	CM:Pyruvate metabolism	1.1.2.4
r0411	Pyruvate dehydrogenase complex	pyr[m] + nad[m] + coa[m] -> nadh[m] + co2[m] + accoa[m]	(ATEG_05705 and ATEG_04262 and ATEG_03737 and ATEG_06014 and ATEG_06361 and ATEG_01642)	CM:Pyruvate metabolism	1.2.4.1:2.3.1.12:1.8.1.4
r0412	Pyruvate carboxylase	h2o[c] + pyr[c] + atp[c] + co2[c] -> oa[c] + 2 h[c] + pi[c] + adp[c]	(ATEG_05433)	CM:pyruvate metabolism	6.4.1.1
r0413	L-lactate dehydrogenase (cytochrome)	2 feri[m] + llac[m] -> pyr[m] + 2 h[m] + 2 fero[m]	(ATEG_06029) or (ATEG_05528) or (ATEG_06941) or (ATEG_10153) or (ATEG_02353) or (ATEG_05195) or (ATEG_04799) or (ATEG_04900) or (ATEG_07183)	CM:Pyruvate metabolism	1.1.2.3
r0414	D-lactate dehydrogenase	nad[m] + lac[m] <=> pyr[m] + h[m] + nadh[m]	(ATEG_09180) or (ATEG_00159) or (ATEG_05091)	CM:Pyruvate metabolism	1.1.1.28	KEGG
r0415	aldehyde dehydrogenase [NAD(P)+]	h2o[c] + nadp[c] + acal[c] -> 2 h[c] + nadph[c] + ac[c]	(ATEG_03231)	CM:Pyruvate metabolism	1.2.1.5
r0416	hydroxyacylglutathione hydrolase	h2o[c] + lgt[c] -> h[c] + lac[c] + gsh[c]	(ATEG_04372) or (ATEG_09545) or (ATEG_03326) or (ATEG_08450) or (ATEG_01990)	CM:Pyruvate metabolism	3.1.2.6
r0417	Pyruvate decarboxylase	pyr[c] + h[c] -> co2[c] + acal[c]	(ATEG_04633) or (ATEG_06881) or (ATEG_02063) or (ATEG_04976) or (ATEG_09124)	CM:Pyruvate metabolism	4.1.1.1
r0418	lactoylglutathione lyase	lgt[c] <=> mgxl[c] + gsh[c]	(ATEG_05866) or (ATEG_01329)	CM:Pyruvate metabolism	4.4.1.5
r0419	Acetyl-CoA hydrolase	h2o[c] + accoa[c] -> h[c] + coa[c] + ac[c]	(ATEG_07747)	CM:Pyruvate metabolism	3.1.2.1
r0420	Acetyl-CoA hydrolase	h2o[m] + accoa[m] -> h[m] + ac[m] + coa[m]	(ATEG_07747)	CM:Pyruvate metabolism	3.1.2.1
r0421	Malate synthase	h2o[m] + accoa[m] + glx[m] -> h[m] + coa[m] + mal[m]	(ATEG_07126)	CM:Pyruvate metabolism:Glyoxylate and dicarboxylate metabolism	2.3.3.9
r0422	Acetyl-CoA carboxylase	accoa[m] + atp[m] + hco3[m] <=> h[m] + pi[m] + adp[m] + malcoa[m]	(ATEG_09702)	CM:Pyruvate metabolism:Propanoate metabolism;TP:Tetracycline biosynthesis;	6.4.1.2
r0423	Acetyl-CoA carboxylase	atp[c] + accoa[c] + hco3[c] <=> h[c] + pi[c] + adp[c] + malcoa[c]	(ATEG_09702)	CM:Pyruvate metabolism:Propanoate metabolism;TP:Tetracycline biosynthesis;	6.4.1.2
r0424	malate dehydrogenase (oxaloacetate-decarboxylating)	nad[c] + mal[c] -> pyr[c] + co2[c] + nadh[c]	(ATEG_01871)	CM:Pyruvate metabolism;EM	1.1.1.38
r0425	malate dehydrogenase (oxaloacetate-decarboxylating) (NADP+)	nadp[m] + mal[m] -> pyr[m] + nadph[m] + co2[m]	(ATEG_09669)	CM:Pyruvate metabolism;EM	1.1.1.40
r0426	pyruvate, water dikinase	h2o[c] + pyr[c] + atp[c] -> 3 h[c] + amp[c] + pi[c] + pep[c]	(ATEG_02219)	CM:Pyruvate metabolism;EM:Methane metabolism	2.7.9.2
r0427	pyruvate, water dikinase	h2o[m] + pyr[m] + atp[m] -> 3 h[m] + pi[m] + amp[m] + pep[m]	(ATEG_02219)	CM:Pyruvate metabolism;EM:Methane metabolism	2.7.9.2
r0428	Endo-1,3-beta-glucanase	h2o[e] + 13glucan[e] -> dglc[e]	(ATEG_06588) or (ATEG_10288)	CM:Starch and sucrose metabolism	3.2.1.39
r0429	1,4-alpha-glucan branching enzyme	14glucan[c] -> h2o[c] + glycogen[c]	(ATEG_07608)	CM:Starch and sucrose metabolism	2.4.1.18
r0430	glycogen debranching enzyme	h2o[c] + star[c] -> adglc[c] + 14glucan[c]	(ATEG_04879)	CM:Starch and sucrose metabolism	3.2.1.33
r0431	glycogen debranching enzyme	mltiose[c] + mlt[c] <=> dglc[c] + mltose[c]	(ATEG_04879)	CM:Starch and sucrose metabolism	2.4.1.25
r0432	starch phosphorylase	pi[c] + mltose[c] -> g1p[c] + mltiose[c]	(ATEG_00484)	CM:Starch and sucrose metabolism	2.4.1.1
r0433	Glycogen phosphorylase	pi[c] + glycogen[c] -> g1p[c]	(ATEG_00484)	CM:Starch and sucrose metabolism	2.4.1.1
r0434	Glycogen synthase	udpg[c] -> udp[c] + 14glucan[c]	(ATEG_09214) or (ATEG_05663)	CM:Starch and sucrose metabolism	2.4.1.11
r0435	Glycogen synthase	udpg[c] -> udp[c] + glycogen[c]	(ATEG_09214) or (ATEG_05663)	CM:Starch and sucrose metabolism	2.4.1.11
r0436	1,3-beta-Glucan synthase	udpg[c] -> udp[c] + 13glucan[c]	(ATEG_09455) or (ATEG_03278 and ATEG_09455)	CM:Starch and sucrose metabolism	2.4.1.34
r0437	Chitinase	h2o[c] + 2 chit[c] -> chib[c]	(ATEG_08022)	CM:Starch and sucrose metabolism	3.2.1.14
r0438	Chitinase	h2o[e] + 2 chit[e] -> chib[e]	(ATEG_06214) or (ATEG_10158) or (ATEG_07368) or (ATEG_05624)	CM:Starch and sucrose metabolism	3.2.1.14
r0439	Alpha-glucosidase	h2o[c] + mltiose[c] -> dglc[c] + mlt[c]	(ATEG_02966) or (ATEG_01729) or (ATEG_01029)	CM:Starch and sucrose metabolism	3.2.1.20
r0440	Beta-glucosidase	h2o[c] + cellob[c] -> 2 dglc[c]	(ATEG_00687) or (ATEG_04135) or (ATEG_04069) or (ATEG_09329) or (ATEG_03047) or (ATEG_06617) or (ATEG_07121) or (ATEG_07419) or (ATEG_07931) or (ATEG_10274) or (ATEG_08027) or (ATEG_09314) or (ATEG_02713) or (ATEG_10320)	CM:Starch and sucrose metabolism	3.2.1.21	(Workman and Day, 1982)
r0441	Alpha-amylase	glycogen[e] -> dglc[e]	(ATEG_04375) or (ATEG_05980) or (ATEG_00724) or (ATEG_03623) or (ATEG_10103) or (ATEG_00838) or (ATEG_03624) or (ATEG_00725) or (ATEG_08279)	CM:Starch and sucrose metabolism	3.2.1.3
r0442	Alpha-amylase	h2o[e] + star[e] -> dglc[e]	(ATEG_04375) or (ATEG_05980) or (ATEG_00724) or (ATEG_03623) or (ATEG_10103) or (ATEG_00725) or (ATEG_08279)	CM:Starch and sucrose metabolism	3.2.1.3
r0443	xylan 1,4-beta-xylosidase	xylan[e] -> xyl[e]	(ATEG_05106) or (ATEG_07383) or (ATEG_09052) or (ATEG_00809) or (ATEG_03410) or (ATEG_07190) or (ATEG_08906) or (ATEG_04943) or (ATEG_07461) or (ATEG_06306)	CM:Starch and sucrose metabolism	3.2.1.37
r0444	xylan 1,4-beta-xylosidase	xylan[c] -> xyl[c]	(ATEG_02724) or (ATEG_00093) or (ATEG_06306)	CM:Starch and sucrose metabolism	3.2.1.37
r0445	cellulase	2 h[e] + cellu[e] -> h2o[e] + 13glucan[e]	(ATEG_03677) or (ATEG_04390) or (ATEG_05003) or (ATEG_00448) or (ATEG_01456) or (ATEG_04210) or (ATEG_05416) or (ATEG_07920) or (ATEG_03755) or (ATEG_05519) or (ATEG_07420) or (ATEG_09894) or (ATEG_07790) or (ATEG_09802)	CM:Starch and sucrose metabolism	3.2.1.4
r0446	cellulase	cellob[e] -> h2o[e] + 2 13glucan[e]	(ATEG_03677) or (ATEG_04390) or (ATEG_05003) or (ATEG_00448) or (ATEG_01456) or (ATEG_04210) or (ATEG_05416) or (ATEG_07920) or (ATEG_03755) or (ATEG_05519) or (ATEG_07420) or (ATEG_09894) or (ATEG_07790) or (ATEG_09802)	CM:Starch and sucrose metabolism	3.2.1.4
r0447	glucan 1,3-beta-glucosidase	h2o[e] + 13glucan[e] -> adglc[e]	(ATEG_03849) or (ATEG_06686) or (ATEG_00336) or (ATEG_00646) or (ATEG_03562)	CM:Starch and sucrose metabolism	3.2.1.58
r0448	Cellulose 1,4-beta-cellobiosidase	12 h[e] + 6 cellu[e] -> 3 h2o[e] + cellob[e] + dglc[e] + cellot[e]	(ATEG_03727) or (ATEG_05002) or (ATEG_08700) or (ATEG_00193) or (ATEG_07493) or (ATEG_08705)	CM:Starch and sucrose metabolism	3.2.1.91
r0449	alpha,alpha-trehalose-phosphate synthase (UDP-forming)	udpg[c] + dg6p[c] -> udp[c] + tre6p[c]	(ATEG_08970 and ATEG_03660) or (ATEG_04277 and ATEG_08970 and ATEG_03660) or (ATEG_04277 and ATEG_03327) or (ATEG_04793 and ATEG_03327) or (ATEG_04793 and ATEG_02142) or (ATEG_04278) or (ATEG_03327) or (ATEG_03659) or (ATEG_04793) or (ATEG_08970)	CM:Starch and sucrose metabolism	2.4.1.15
r0450	Alpha-glucosidase	h2o[c] + mlt[c] -> 2 dglc[c]	(ATEG_01029) or (ATEG_01729) or (ATEG_02528) or (ATEG_08063) or (ATEG_08064) or (ATEG_02966) or (ATEG_08278)	CM:Starch and sucrose metabolism	3.2.1.20
r0451	Alpha-glucosidase	h2o[e] + mlt[e] -> 2 dglc[e]	(ATEG_00723) or (ATEG_08278) or (ATEG_08472) or (ATEG_05177) or (ATEG_08059) or (ATEG_08065)	CM:Starch and sucrose metabolism	3.2.1.20
r0452	trehalose-phosphatase	h2o[c] + tre6p[c] -> pi[c] + tre[c]	(ATEG_03327) or (ATEG_03659) or (ATEG_08970)	CM:Starch and sucrose metabolism	3.1.3.12
r0453	Neutral trehalase	h2o[c] + tre[c] -> 2 dglc[c]	(ATEG_03233)	CM:Starch and sucrose metabolism	3.2.1.28
r0454	acid trehalase	h2o[e] + tre[e] -> 2 dglc[e]	(ATEG_07476)	CM:Starch and sucrose metabolism	3.2.1.28
r0455	Polygalacturonase-4	h2o[e] + ptate[e] -> galunt[e]	(ATEG_07748) or (ATEG_01601)	CM:Starch and sucrose metabolism:Pentose and glucuronate interconversions	3.2.1.15
r0456	aldehyde dehydrogenase (NAD+)	h2o[c] + nad[c] + glyal[c] <=> 2 h[c] + nadh[c] + g[c]	(ATEG_05020) or (ATEG_03231) or (ATEG_06083) or (ATEG_08300) or (ATEG_08120)	CM;AA;LM;OA;TP	1.2.1.3
r0457	acetate kinase	atp[c] + ac[c] -> adp[c] + acpi[c]	(ATEG_04604)	CM;EM;OA	2.7.2.1
r0458	dethiobiotin synthetase	atp[c] + co2[c] + danna[c] -> 3 h[c] + pi[c] + adp[c] + dtb[c]	(ATEG_07102)	CV:Biotin metabolism	6.3.3.3
r0459	dethiobiotin synthetase	co2[m] + atp[m] + danna[m] -> 3 h[m] + pi[m] + adp[m] + dtb[m]	(ATEG_07102)	CV:Biotin metabolism	6.3.3.3
r0460	biotin synthase	2 sam[m] + dtb[m] + s[m] -> 2 met[m] + bt[m] + 2 da[m]	(ATEG_07101)	CV:Biotin metabolism	2.8.1.6
r0461	biotin--protein ligase	atp[c] + bt[c] -> ppi[c] + btamp[c]	(ATEG_04392)	CV:Biotin metabolism	6.3.4.15
r0462	biotin--protein ligase	btamp[c] -> amp[c] + bccp[c]	(ATEG_04392)	CV:Biotin metabolism	6.3.4.15
r0463	B-ketoacyl-ACP synthase (c10,0), fatty acyl CoA synthase	6 h[c] + 4 nadph[c] + 3 malcoa[c] -> 2 h2o[c] + 2 co2[c] + 4 nadp[c] + 2 coa[c] + chcoa[c]	(ATEG_08667) or (ATEG_08668) or (ATEG_04258) or (ATEG_04259) or (ATEG_08172) or (ATEG_01894) or (ATEG_00913)	CV:Biotin metabolism	6.4.1.2:6.3.4.1:4 2.3.1.85;1.1.1.100;2.3.1.41;4.2.1.61
r0464	8-Amino-7-oxononanoate synthase	ala[c] + h[c] + chcoa[c] -> co2[c] + coa[c] + aona[c]	(ATEG_01808) or (ATEG_08169) or (ATEG_07103)	CV:Biotin metabolism	2.3.1.47
r0465	Adenosylmethionine-8-amino-7-oxononanoate transaminase	sam[m] + aona[m] -> danna[m] + samob[m]	(ATEG_02787) or (ATEG_05114) or (ATEG_07102)	CV:Biotin metabolism	2.6.1.62
r0466	Adenosylmethionine-8-amino-7-oxononanoate transaminase	sam[c] + aona[c] -> danna[c] + samob[c]	(ATEG_02787) or (ATEG_05114) or (ATEG_07102)	CV:Biotin metabolism	2.6.1.62
r0467	biotin synthase	2 sam[c] + dtb[c] + s[c] -> 2 met[c] + bt[c] + 2 da[c]	(ATEG_07101)	CV:Biotin metabolism	2.8.1.6
r0468	GTP cyclohydrolase I	h2o[m] + gtp[m] -> h[m] + for[m] + ahtd[m]	(ATEG_08101) or (ATEG_02195)	CV:Folate biosynthesis	3.5.4.16
r0469	Dihydropteroate synthase	abee[c] + ahhmp[c] -> h2o[c] + dhpt[c]	(ATEG_04534)	CV:Folate biosynthesis	2.5.1.15
r0470	Dihydrofolate reductase	2 h[c] + 2 nadph[c] + fot[c] -> 2 nadp[c] + thf[c]	(ATEG_01604) or (ATEG_03383)	CV:Folate biosynthesis	1.5.1.3
r0471	Dihydrofolate reductase	nadp[c] + dhf[c] <=> h[c] + nadph[c] + fot[c]	(ATEG_01604) or (ATEG_03383)	CV:Folate biosynthesis	1.5.1.3
r0472	folylpolyglutamate synthase	glu[c] + atp[c] + dhpt[c] -> h[c] + pi[c] + adp[c] + dhf[c]	(ATEG_05556) or (ATEG_05398)	CV:Folate biosynthesis	6.3.2.17
r0473	Dihydrofolate reductase	h[m] + nadph[m] + dhf[m] <=> nadp[m] + thf[m]	(ATEG_09730)	CV:Folate biosynthesis	1.5.1.3
r0474	Dihydrofolate reductase	h[c] + nadph[c] + dhf[c] -> nadp[c] + thf[c]	(ATEG_01604) or (ATEG_03383)	CV:Folate biosynthesis	1.5.1.3
r0475	Dihydropteroate synthase	ahhmd[c] + abee[c] -> h[c] + ppi[c] + dhpt[c]	(ATEG_04534)	CV:Folate biosynthesis	2.5.1.15
r0476	2-amino-4-hydroxy-6-hydroxymethyldihydropteridine diphosphokinase	atp[c] + ahhmp[c] -> h[c] + amp[c] + ahhmd[c]	(ATEG_04420)	CV:Folate biosynthesis	2.7.6.3
r0477	alkaline phosphatase	3 h2o[c] + ahtd[c] -> 3 h[c] + 3 pi[c] + dhp[c]	(ATEG_09581) or (ATEG_04029)	CV:Folate biosynthesis	3.1.3.1
r0478	GTP cyclohydrolase I	h2o[c] + gtp[c] -> h[c] + for[c] + ahtd[c]	(ATEG_08101)	CV:Folate biosynthesis	3.5.4.16
r0479	Dihydroneopterin aldolase	dhp[c] -> ahhmp[c] + glal[c]	(ATEG_04534)	CV:Folate biosynthesis	4.1.2.25
r0480	alkaline phosphatase	h2o[c] + d6pgc[c] -> pi[c] + glcnt[c]	(ATEG_09581) or (ATEG_07922) or (ATEG_03843) or (ATEG_04554) or (ATEG_02176) or (ATEG_08252) or (ATEG_05038) or (ATEG_00288) or (ATEG_09808) or (ATEG_00017) or (ATEG_04029) or (ATEG_07131)	CV:Folate biosynthesis	3.1.3.1
r0481	NADH kinase	nadh[m] + atp[m] -> h[m] + nadph[m] + adp[m]	(ATEG_09445)	CV:NAD and NADP Conversion	2.7.1.86
r0482	Nicotinamide-nucleotide adenylyltransferase	atp[c] + nmn[c] <=> ppi[c] + nad[c]	(ATEG_06641)	CV:Nicotinate and Nicotinamide biosynthesis	2.7.7.1
r0483	Nicotinate phosphoribosyltransferase	prpp[c] + nica[c] <=> ppi[c] + ncn[c]	(ATEG_01817)	CV:Nicotinate and Nicotinamide biosynthesis	2.4.2.11
r0484	nicotinate-nucleotide diphosphorylase (carboxylating)	h[c] + prpp[c] + qa[c] -> ppi[c] + co2[c] + ncn[c]	(ATEG_08963)	CV:Nicotinate and Nicotinamide biosynthesis	2.4.2.19
r0485	NAD+ kinase	atp[c] + nad[c] -> h[c] + nadp[c] + adp[c]	(ATEG_01993) or (ATEG_08163)	CV:Nicotinate and Nicotinamide biosynthesis	2.7.1.23
r0486	Nicotinamide-nucleotide adenylyltransferase	atp[c] + ncn[c] <=> ppi[c] + dmnad[c]	(ATEG_06641)	CV:Nicotinate and Nicotinamide biosynthesis	2.7.7.1
r0487	aspartate dehydrogenase	asp[c] + nadp[c] -> 2 h[c] + nadph[c] + iasp[c]	(ATEG_06641)	CV:Nicotinate and nicotinamide metabolism	1.4.1.21
r0488	purine-nucleoside phosphorylase	pi[c] + nar[c] <=> h[c] + r1p[c] + nica[c]	(ATEG_05630)	CV:Nicotinate and nicotinamide metabolism	2.4.2.1
r0489	purine-nucleoside phosphorylase	pi[c] + nnr[c] <=> h[c] + r1p[c] + nicd[c]	(ATEG_05630)	CV:Nicotinate and nicotinamide metabolism	2.4.2.1
r0490	NAD+ synthase	h2o[c] + gln[c] + atp[c] + dmnad[c] -> glu[c] + 2 h[c] + amp[c] + ppi[c] + nad[c]	(ATEG_08080)	CV:Nicotinate and nicotinamide metabolism	6.3.5.1
r0491	NAD(P)+ transhydrogenase	nadph[m] + nad[m] <=> nadp[m] + nadh[m]	(ATEG_09253)	CV:Nicotinate and nicotinamide metabolism	1.6.1.2
r0492	5'-nucleotidase	h2o[c] + nmn[c] -> pi[c] + nnr[c]	(ATEG_00939) or (ATEG_00940) or (ATEG_03843)	CV:Nicotinate and nicotinamide metabolism	3.1.3.5
r0493	5'-nucleotidase	h2o[c] + ncn[c] -> pi[c] + nar[c]	(ATEG_00939) or (ATEG_00940) or (ATEG_03843)	CV:Nicotinate and nicotinamide metabolism	3.1.3.5
r0494	Nicotinamidase	h2o[c] + nicd[c] -> nh3[c] + nica[c]	(ATEG_07327) or (ATEG_00861) or (ATEG_09512)	CV:Nicotinate and nicotinamide metabolism	3.5.1.19
r0495	NAD+ diphosphatase	h2o[c] + nad[c] -> 2 h[c] + amp[c] + nmn[c]	(ATEG_08079)	CV:Nicotinate and nicotinamide metabolism	3.6.1.22
r0496	5-formyltetrahydrofolate cyclo-ligase	atp[c] + foli[c] -> pi[c] + adp[c] + methf[c]	(ATEG_06335)	CV:One carbon pool by folate	6.3.3.2
r0497	methylenetetrahydrofolate dehydrogenase (NADP+)	nadph[c] + methf[c] <=> nadp[c] + metthf[c]	(ATEG_01604)	CV:One carbon pool by folate	1.5.1.5
r0498	formate-tetrahydrofolate ligase	atp[c] + thf[c] + for[c] -> pi[c] + adp[c] + fthf[c]	(ATEG_01604)	CV:One carbon pool by folate	6.3.4.3
r0499	formate-tetrahydrofolate ligase	atp[m] + thf[m] + for[m] -> pi[m] + adp[m] + fthf[m]	(ATEG_01604)	CV:One carbon pool by folate	6.3.4.3
r0500	methylenetetrahydrofolate dehydrogenase (NAD+)	nad[c] + metthf[c] <=> nadh[c] + methf[c]	(ATEG_04768)	CV:One carbon pool by folate	1.5.1.15
r0501	methylenetetrahydrofolate reductase [NAD(P)H]	h[m] + nadph[m] + metthf[m] <=> nadp[m] + mthf[m]	(ATEG_01447)	CV:One carbon pool by folate	1.5.1.20
r0502	methylenetetrahydrofolate reductase [NAD(P)H]	h[c] + nadph[c] + metthf[c] <=> nadp[c] + mthf[c]	(ATEG_08067)	CV:One carbon pool by folate	1.5.1.20
r0503	methylenetetrahydrofolate dehydrogenase (NADP+)	nadph[m] + methf[m] <=> nadp[m] + metthf[m]	(ATEG_01604)	CV:One carbon pool by folate	1.5.1.5
r0504	Methenyltetrahydrofolate cyclohydrolase	h[m] + fthf[m] <=> h2o[m] + methf[m]	(ATEG_01604)	CV:One carbon pool by folate	3.5.4.9
r0505	Methenyltetrahydrofolate cyclohydrolase	h[c] + fthf[c] <=> h2o[c] + methf[c]	(ATEG_01604)	CV:One carbon pool by folate	3.5.4.9
r0506	formyltetrahydrofolate deformylase	h2o[c] + fthf[c] -> h[c] + thf[c] + for[c]	(ATEG_05001)	CV:One carbon pool by folate;CM:Glyoxylate and dicarboxylate metabolism	3.5.1.10
r0507	Phosphoribosylglycinamide formyltransferase	h2o[c] + methf[c] + gar[c] -> 2 h[c] + thf[c] + fgar[c]	(ATEG_01492) or (ATEG_01493)	CV:One carbon pool by folate;NM:Purine metabolism	2.1.2.2
r0508	Phosphoribosylglycinamide formyltransferase	fthf[c] + gar[c] -> h[c] + thf[c] + fgar[c]	(ATEG_01492) or (ATEG_01493)	CV:One carbon pool by folate;NM:Purine metabolism	2.1.2.2
r0509	phosphoribosylaminoimidazolecarboxamide formyltransferase	aicar[c] + fthf[c] -> thf[c] + prfica[c]	(ATEG_05435)	CV:One carbon pool by folate;NM:Purine metabolism	2.1.2.3
r0510	ATP citrate synthase	atp[c] + coa[c] + cit[c] -> oa[c] + pi[c] + accoa[c] + adp[c]	(ATEG_02375)	CV:Pantothenate and CoA biosynthesis	2.3.3.8
r0511	type II pantothenateKinase	atp[c] + pnto[c] -> h[c] + adp[c] + ppnto[c]	(ATEG_01753)	CV:Pantothenate and CoA biosynthesis	2.7.1.33
r0512	phosphopantothenate-cysteine ligase	cys[c] + ctp[c] + ppnto[c] -> 2 h[c] + ppi[c] + cmp[c] + ppntocys[c]	(ATEG_01750)	CV:Pantothenate and CoA biosynthesis	6.3.2.5
r0513	phosphopantothenoylcysteine decarboxylase	h[c] + ppntocys[c] -> co2[c] + ppthe[c]	(ATEG_06930)	CV:Pantothenate and CoA biosynthesis	4.1.1.36
r0514	phosphopantetheine adenylyltransferase	atp[c] + ppthe[c] -> ppi[c] + dpcoa[c]	(ATEG_05345)	CV:Pantothenate and CoA biosynthesis	2.7.7.3
r0515	dihydroxy-acid dehydratase	dhival[m] -> h2o[m] + oival[m]	(ATEG_03509)	CV:Pantothenate and CoA biosynthesis	1.3.1.72
r0516	ketol-acid reductoisomerase	h[m] + nadph[m] + aclac[m] -> nadp[m] + dhival[m]	(ATEG_03509)	CV:Pantothenate and CoA biosynthesis	1.1.1.86
r0517	Pantoate-beta-alanine ligase	atp[c] + pant[c] + bala[c] -> 2 h[c] + amp[c] + ppi[c] + pnto[c]	(ATEG_07696)	CV:Pantothenate and CoA biosynthesis	6.3.2.1
r0518	3-methyl-2-oxobutanoate hydroxymethyltransferase	h2o[c] + metthf[c] + oival[c] -> thf[c] + akp[c]	(ATEG_06675)	CV:Pantothenate and CoA biosynthesis	2.1.2.11
r0519	3-methyl-2-oxobutanoate hydroxymethyltransferase	h2o[m] + metthf[m] + oival[m] -> thf[m] + akp[m]	(ATEG_06675)	CV:Pantothenate and CoA biosynthesis	2.1.2.11
r0520	2-dehydropantoate 2-reductase	h[c] + nadph[c] + akp[c] <=> nadp[c] + pant[c]	(ATEG_05740) or (ATEG_08787) or (ATEG_03538) or (ATEG_07680) or (ATEG_01034)	CV:Pantothenate and CoA biosynthesis	1.1.1.169
r0521	2-dehydropantoate 2-reductase	h[m] + nadph[m] + akp[m] <=> nadp[m] + pant[m]	(ATEG_05740) or (ATEG_08787) or (ATEG_03509)	CV:Pantothenate and CoA biosynthesis	1.1.1.169
r0522	Dephospho-CoA kinase	atp[c] + dpcoa[c] -> h[c] + coa[c] + adp[c]	(ATEG_09824)	CV:Pantothenate and CoA biosynthesis	2.7.1.24
r0523	D-mandelate dehydrogenase	nad[c] + dmand[c] <=> h[c] + nadh[c] + bfor[c]	(ATEG_08159)	CV:Pantothenate and CoA biosynthesis;OA:beta-Alanine metabolism;NM:Pyrimidine metabolism	1.2.1.-
r0524	beta-ureidopropionase	h2o[c] + 2 h[c] + uppe[c] -> nh3[c] + co2[c] + bala[c]	(ATEG_03304)	CV:Pantothenate and CoA biosynthesis;OA:beta-Alanine metabolism;NM:Pyrimidine metabolism	3.5.1.6
r0525	Dihydropyrimidinase	h2o[c] + dhura[c] -> h[c] + uppe[c]	(ATEG_02719) or (ATEG_07107)	CV:Pantothenate and CoA biosynthesis;OA:beta-Alanine metabolism;NM:Pyrimidine metabolism	3.5.2.2
r0526	glutamyl-tRNA synthetase	glu[c] + atp[c] + glutrna[c] <=> h[c] + amp[c] + ppi[c] + lglutrna[c]	(ATEG_08056) or (ATEG_02319) or (ATEG_01178)	CV:Porphyrin and chlorophyll metabolism	6.1.1.17
r0527	glutamate-1-semialdehyde 2,1-aminomutase	glu1sal[m] -> amievul[m]	(ATEG_09582)	CV:Porphyrin and chlorophyll metabolism	5.4.3.8
r0528	Uroporphyrinogen decarboxylase	upgi[c] -> 4 co2[c] + cpgi[c]	(ATEG_02572)	CV:Porphyrin and chlorophyll metabolism	4.1.1.37
r0529	Uroporphyrinogen decarboxylase	4 h[m] + upgiii[m] -> 4 co2[m] + cpgiii[m]	(ATEG_02572)	CV:Porphyrin and chlorophyll metabolism	4.1.1.37
r0530	glutamate-1-semialdehyde 2,1-aminomutase	glu1sal[c] -> amievul[c]	(ATEG_09582)	CV:Porphyrin and chlorophyll metabolism	5.4.3.8
r0531	cytochrome oxidase assembly factor COX15	h2o[m] + hemeo[m] -> 4 h[m] + hemea[m]	(ATEG_05900)	CV:Porphyrin and chlorophyll metabolism
r0532	Precorrin-2 dehydrogenase	nad[c] + precor[c] -> 2 h[c] + nadh[c] + shcr[c]	(ATEG_06363)	CV:Porphyrin and chlorophyll metabolism	1.3.1.76
r0533	coproporphyrinogen oxidase	o2[m] + 2 h[m] + cpgiii[m] -> 2 h2o[m] + 2 co2[m] + ppgix[m]	(ATEG_10179)	CV:Porphyrin and chlorophyll metabolism	1.3.3.3
r0534	Protoporphyrinogen oxidase	3 o2[m] + ppgix[m] -> 3 h2o2[m] + pprix[m]	(ATEG_05811)	CV:Porphyrin and chlorophyll metabolism	1.3.3.4
r0535	uroporphyrinogen-III C-methyltransferase	2 sam[c] + upgiii[c] -> h[c] + 2 sah[c] + precor[c]	(ATEG_08758)	CV:Porphyrin and chlorophyll metabolism	2.1.1.107
r0536	5-aminolevulinate synthase	h[m] + gly[m] + succoa[m] -> co2[m] + coa[m] + amievul[m]	(ATEG_09405)	CV:Porphyrin and chlorophyll metabolism	2.3.1.37
r0537	Heme O synthase	h2o[m] + hemeb[m] + fpp[c] -> h[m] + ppi[m] + hemeo[m]	(ATEG_05362)	CV:Porphyrin and chlorophyll metabolism	2.5.1.-
r0538	Hydroxymethylbilane synthase	h2o[c] + 4 ppbg[c] -> 4 nh3[c] + hmtb[c]	(ATEG_02094) or (ATEG_06405)	CV:Porphyrin and chlorophyll metabolism	2.5.1.61
r0539	Uroporphyrinogen decarboxylase	4 h[c] + upgiii[c] -> 4 co2[c] + cpgiii[c]	(ATEG_02572)	CV:Porphyrin and chlorophyll metabolism	4.1.1.37
r0540	Porphobilinogen synthase	2 amievul[c] -> 2 h2o[c] + h[c] + ppbg[c]	(ATEG_08491)	CV:Porphyrin and chlorophyll metabolism	4.2.1.24	AsperCyc
r0541	Holocytochrome-c synthase	2 h[m] + hemeb[m] + apoce[m] -> cytc[m]	(ATEG_05499) or (ATEG_02752)	CV:Porphyrin and chlorophyll metabolism	4.4.1.17
r0542	Ferrochelatase	pprix[m] + fe[c] -> 2 h[c] + hemeb[m]	(ATEG_08354)	CV:Porphyrin and chlorophyll metabolism	4.99.1.1
r0543	sirohydrochlorin ferrochelatase	shcr[c] + fe[c] -> 2 h[c] + sihm[c]	(ATEG_06363)	CV:Porphyrin and chlorophyll metabolism	4.99.1.4
r0544	GTP cyclohydrolase II	3 h2o[m] + gtp[m] -> 3 h[m] + ppi[m] + for[m] + d6rp5p[m]	(ATEG_00531) or (ATEG_07295) or (ATEG_08154)	CV:Riboflavin metabolism	3.5.4.25
r0545	2,5-diamino-6-(ribosylamino)-4(3H)-pyrimidinone 5'-phosphate reductase	h[c] + nadh[c] + d6rp5p[c] <=> nad[c] + d6pr5po[c]	(ATEG_02766)	CV:Riboflavin metabolism	1.1.1.302
r0546	riboflavin synthase	h[c] + 2 dmlr[c] -> aura[c] + vb2[c]	(ATEG_02991)	CV:Riboflavin metabolism	2.5.1.9
r0547	5-amino-6-(5-phosphoribosylamino)uracil reductase	h[c] + nadph[c] + a6rp5p[c] -> nadp[c] + a6rp5p2[c]	(ATEG_02766)	CV:Riboflavin metabolism	1.1.1.193
r0548	Riboflavin kinase	atp[c] + vb2[c] -> h[c] + adp[c] + fmn[c]	(ATEG_06773)	CV:Riboflavin metabolism	2.7.1.26
r0549	FAD synthetase	atp[c] + fmn[c] -> ppi[c] + fad[c]	(ATEG_05060)	CV:Riboflavin metabolism	2.7.7.2
r0550	GTP cyclohydrolase II	3 h2o[c] + gtp[c] -> 3 h[c] + ppi[c] + for[c] + d6rp5p[c]	(ATEG_00531) or (ATEG_07295) or (ATEG_08154)	CV:Riboflavin metabolism	3.5.4.25
r0551	3,4-dihydroxy-2-butanone 4-phosphate synthase	rl5p[c] -> h[c] + for[c] + db4p[c]	(ATEG_03346)	CV:Riboflavin metabolism	4.1.99.12
r0552	Acid phosphatase	h2o[m] + t3p2[m] <=> pi[m] + glyn[m]	(ATEG_05159)	CV:Riboflavin metabolism	3.1.3.2
r0553	Acid phosphatase	h2o[c] + fmn[c] -> pi[c] + vb2[c]	(ATEG_05159)	CV:Riboflavin metabolism	3.1.3.2
r0554	Riboflavin synthase	d8rl[c] -> vb2[c] + a6rp[c]	(ATEG_02991)	CV:Riboflavin metabolism	2.5.1.9
r0555	Acid phosphatase	h2o[e] + fmn[e] -> pi[e] + vb2[e]	(ATEG_08252) or (ATEG_05038) or (ATEG_03516) or (ATEG_02176) or (ATEG_10200) or (ATEG_03100) or (ATEG_02031)	CV:Riboflavin metabolism	3.1.3.2
r0556	thiamine diphosphokinase	atp[c] + thdp[c] -> adp[c] + thtp[c]	(ATEG_05238) or (ATEG_07686) or (ATEG_06416)	CV:Thiamine metabolism	2.7.6.2
r0557	hydroxymethylpyrimidine/phosphomethylpyrimidineKinase	2 atp[c] + top[c] -> 2 adp[c] + ahmpp[c]	(ATEG_01502)	CV:Thiamine metabolism	2.7.1.49:2.7.4.7
r0558	thiamine biosynthesis protein ThiC	air[c] -> pi[c] + ac[c] + top[c]	(ATEG_01502)	CV:Thiamine metabolism	ThiC
r0559	thiamine-phosphate diphosphorylase	thzp[c] + ahmpp[c] -> ppi[c] + thmp[c]	(ATEG_09879)	CV:Thiamine metabolism	2.5.1.3
r0560	Hydroxyethylthiazole kinase	atp[c] + thz[c] -> h[c] + adp[c] + thzp[c]	(ATEG_09879)	CV:Thiamine metabolism	2.7.1.50
r0561	thiamine diphosphokinase	atp[c] + thm[c] -> h[c] + amp[c] + thdp[c]	(ATEG_05238) or (ATEG_07686) or (ATEG_06416)	CV:Thiamine metabolism	2.7.6.2
r0562	MPBQ/MSBQ methyltransferase	sam[m] + mpyq[m] -> h[m] + sah[m] + dmpyq[m]	(ATEG_06639)	CV:Ubiquinone and other terpenoid-quinone biosynthesis	2.1.1.-
r0563	homogenitisate phytyltransferase	homogen[m] + pypp[m] -> co2[m] + ppi[m] + mpyq[m]	(ATEG_10078) or (ATEG_06825)	CV:Ubiquinone and other terpenoid-quinone biosynthesis	2.5.1.-
r0564	3-demethylubiquinone-9 3-methyltransferase	sam[m] + omhmb[m] -> h[m] + q[m] + sah[m]	(ATEG_06639)	CV:Ubiquinone and other terpenoid-quinone biosynthesis	2.1.1.-
r0565	3-demethylubiquinone-9 3-methyltransferase	sam[m] + ohphl[m] -> h[m] + om[m] + sah[m]	(ATEG_06639)	CV:Ubiquinone and other terpenoid-quinone biosynthesis	2.1.1.-
r0566	2-octaprenyl-6-methoxyphenol hydroxylase	o2[m] + nadph[m] + om[m] -> h2o[m] + nadp[m] + h[m] + omb[m]	(ATEG_03175)	CV:Ubiquinone and other terpenoid-quinone biosynthesis	1.14.13.-
r0567	2-octaprenyl-3-methyl-6-methoxy-1,4-benzoquinone hydroxylase	o2[m] + h[m] + nadph[m] + ommb[m] -> h2o[m] + nadp[m] + omhmb[m]	(ATEG_05732) or (ATEG_03175)	CV:Ubiquinone and other terpenoid-quinone biosynthesis	1.14.13.-
r0568	Ubiquinone biosynthesis methlytransferase	sam[m] + omb[m] -> h[m] + ommb[m] + sah[m]	(ATEG_06639)	CV:Ubiquinone and other terpenoid-quinone biosynthesis	2.1.1.-
r0569	4-hydroxybenzoate hexaprenyltransferase	4hba[m] + npp[m] -> h[m] + ppi[m] + n4hbz[m]	(ATEG_06825)	CV:Ubiquinone and other terpenoid-quinone biosynthesis	2.5.1.-
r0570	pyridoxine kinase	atp[c] + pdxal[c] -> h[c] + adp[c] + plp[c]	(ATEG_02518)	CV:Vitamin B6 metabolism	2.7.1.35
r0571	pyridoxine kinase	atp[c] + pdxam[c] -> h[c] + adp[c] + pdxam5pi[c]	(ATEG_02518)	CV:Vitamin B6 metabolism	2.7.1.35
r0572	pyridoxine kinase	atp[c] + pdxi[c] -> h[c] + adp[c] + pdxi5pi[c]	(ATEG_02518)	CV:Vitamin B6 metabolism	2.7.1.35
r0573	pyridoxine 4-dehydrogenase	nadp[c] + pdxi[c] <=> h[c] + nadph[c] + pdxal[c]	(ATEG_00217) or (ATEG_00557)	CV:Vitamin B6 metabolism	1.1.1.65
r0574	phosphoserine aminotransferase	akg[c] + pht[c] <=> glu[c] + ohpbt[c]	(ATEG_01055)	CV:Vitamin B6 metabolism	2.6.1.52
r0575	Threonine synthase	h2o[c] + pht[c] -> pi[c] + hthr[c]	(ATEG_06409)	CV:Vitamin B6 metabolism	4.2.3.1
r0576	Pyridoxine synthesise	t3p1[c] + rl5p[c] -> pi[c] + plp[c]	(ATEG_08317)	CV:Vitamin B6 metabolism	4.-.-.-
r0577	pyridoxal 5'-phosphate synthase	h2o[c] + o2[c] + pdxam5pi[c] -> h2o2[c] + nh3[c] + plp[c]	(ATEG_07618) or (ATEG_08752)	CV:Vitamin B6 metabolism	1.4.3.5
r0578	pyridoxal 5'-phosphate synthase	o2[c] + pdxi5pi[c] -> h2o2[c] + plp[c]	(ATEG_07618) or (ATEG_08752)	CV:Vitamin B6 metabolism	1.4.3.5
r0579	pyridoxamine 5'-phosphate oxidase	o2[c] + pdxi[c] <=> h2o2[c] + pdxal[c]	(ATEG_08752)	CV:Vitamin B6 metabolism	1.4.3.5
r0580	pyridoxamine 5'-phosphate oxidase	h2o[c] + o2[c] + pdxam[c] <=> h2o2[c] + nh3[c] + pdxal[c]	(ATEG_07618)	CV:Vitamin B6 metabolism	1.4.3.5
r0581	glutamine amidotransferase	gln[c] + t3p1[c] + rl5p[c] -> 3 h2o[c] + glu[c] + h[c] + pi[c] + plp[c]	(ATEG_09694)	CV:Vitamin B6 metabolism	2.6.-.-
etf-qo	Electron-transferring-flavoprotein dehydrogenase	fadh2[m] + q[m] -> h[m] + fad[m] + qh2[m]	(ATEG_04541 and ATEG_06386 and ATEG_09341)	EM	1.5.5.1
oxids alte	alternative oxidase	0.5 o2[m] + qh2[m] -> h2o[m] + q[m]	(ATEG_05999) or (ATEG_07440)	EM	1.10.3.11
r0582	NAD(P)H oxidase	o2[c] + h[c] + nadph[c] -> h2o2[c] + nadp[c]	(ATEG_03371)	EM	1.6.3.1
r0583	NADPH dehydrogenase	h[c] + nadph[c] + q[m] -> nadp[c] + qh2[m]	(ATEG_02705) or (ATEG_02824) or (ATEG_08617) or (ATEG_09073) or (ATEG_09940)	EM	1.6.99.1
tr_atp/adp	ADP,ATP carrier protein	pi[c] + adp[c] + atp[m] -> atp[c] + pi[m] + adp[m]	(ATEG_03087)	EM	2.A.29.1.2;7
tr_na	Na+-exporting ATPase	h2o[c] + atp[c] + na[c] -> h[c] + pi[c] + adp[c] + na[e]	(ATEG_05265) or (ATEG_08161 and ATEG_05265) or (ATEG_07100) or (ATEG_08161) or (ATEG_04048)	EM	3.6.3.7
r0584	S-(hydroxymethyl)glutathione synthase	fald[c] + gsh[c] -> hygta[c]	(ATEG_04948)	EM:Methane metabolism	4.4.1.22
r0585	catalase/peroxidase	h2o2[c] + meth[c] -> 2 h2o[c] + fald[c]	(ATEG_08422)	EM:Methane metabolism	1.11.1.6;1.11.1.7;1.11.1.12
r0586	catalase	2 h2o2[e] -> 2 h2o[e] + o2[e]	(ATEG_07477)	EM:Methane metabolism	1.11.1.6
r0587	Alcohol oxidase	o2[c] + meth[c] -> h2o2[c] + fald[c]	(ATEG_09188)	EM:Methane metabolism	1.1.3.13
r0588	Alcohol oxidase	o2[c] + eth[c] -> h2o2[c] + acal[c]	(ATEG_09188)	EM:Methane metabolism	1.1.3.13
r0589	Alcohol oxidase	o2[c] + gl[c] -> h2o2[c] + glyal[c]	(ATEG_09188)	EM:Methane metabolism	1.1.3.13
r0590	Alcohol oxidase	o2[c] + gl[c] -> h2o2[c] + glyn[c]	(ATEG_09188)	EM:Methane metabolism	1.1.3.13
r0591	catalase	2 h2o2[c] -> 2 h2o[c] + o2[c]	(ATEG_01487) or (ATEG_07460)	EM:Methane metabolism	1.11.1.6
r0592	formaldehyde transketolase	t3p1[c] + glyn[c] <=> fald[c] + x5p[c]	(ATEG_00552) or (ATEG_08856) or (ATEG_09081)	EM:Methane metabolism	2.2.1.3
r0593	S-(hydroxymethyl)glutathione dehydrogenase	nad[c] + hygta[c] -> h[c] + nadh[c] + fgt[c]	(ATEG_04947) or (ATEG_08139)	EM:Methane metabolism	1.1.1.284	KEGG
r0594	S-(hydroxymethyl)glutathione dehydrogenase	nadp[c] + hygta[c] -> h[c] + nadph[c] + fgt[c]	(ATEG_04947) or (ATEG_08139)	EM:Methane metabolism	1.1.1.284	KEGG
r0595	S-formylglutathione hydrolase	h2o[c] + fgt[c] <=> h[c] + for[c] + gsh[c]	(ATEG_06438)	EM:Methane metabolism	3.1.2.12
r0596	ethanol degradation IV	h2o2[c] + eth[c] -> 2 h2o[c] + acal[c]	(ATEG_08422) or (ATEG_02945) or (ATEG_01487)	EM:Methane metabolism;AA	1.11.1.6	MetaCyc
r0597	Cyanate hydratase	2 h[e] + hco3[e] + cyan[e] -> nh3[e] + 2 co2[e]	(ATEG_02276)	EM:Nitrogen metabolism	4.2.1.104
r0598	carbonate dehydratase	h2o[e] + co2[e] -> h[e] + hco3[e]	(ATEG_00166) or (ATEG_06105) or (ATEG_03956)	EM:Nitrogen metabolism	4.2.1.1
r0599	spontaneous conversion	nh4oh[c] <=> h2o[c] + nh3[c]		EM:Nitrogen metabolism
r0600	carbonate dehydratase	h[c] + hco3[c] <=> h2o[c] + co2[c]	(ATEG_03956) or (ATEG_10070)	EM:Nitrogen metabolism	4.2.1.1
r0601	Urea carboxylase	h2o[c] + atp[c] + co2[c] + urea[c] <=> 2 h[c] + pi[c] + adp[c] + ureac[c]	(ATEG_05246)	EM:Nitrogen metabolism	6.3.4.6
r0602	nitrate reductase (NADPH)	h[c] + nadph[c] + hno3[c] -> h2o[c] + nadp[c] + hno2[c]	(ATEG_00474)	EM:Nitrogen metabolism	1.7.1.3
r0603	nitrite reductase [NAD(P)H]	5 h[c] + 3 nadph[c] + hno2[c] -> h2o[c] + 3 nadp[c] + nh4oh[c]	(ATEG_00475)	EM:Nitrogen metabolism	1.7.1.4
r0604	nitrite reductase [NAD(P)H]	5 h[c] + 3 nadh[c] + hno2[c] -> h2o[c] + 3 nad[c] + nh4oh[c]	(ATEG_00475) or (ATEG_05678)	EM:Nitrogen metabolism	1.7.1.4
r0605	Urease	h2o[c] + 2 h[c] + urea[c] -> 2 nh3[c] + co2[c]	(ATEG_03748)	EM:Nitrogen metabolism	3.5.1.5
r0606	carbonate dehydratase	h2o[c] + co2[c] -> h[c] + hco3[c]	(ATEG_00166) or (ATEG_06105) or (ATEG_03956)	EM:Nitrogen metabolism	4.2.1.1
r0607	Nitrate reductase (NADH)	h[c] + nadh[c] + hno3[c] -> h2o[c] + nad[c] + hno2[c]	(ATEG_07595) or (ATEG_00474)	EM:Nitrogen metabolism	1.7.1.1
r0608	Glutamate-ammonia ligase	nh3[c] + glu[c] + atp[c] -> gln[c] + h[c] + pi[c] + adp[c]	(ATEG_02177) or (ATEG_03195) or (ATEG_03724) or (ATEG_02177) or (ATEG_04388)	EM:Nitrogen metabolism;AA	6.3.1.2
r0609	Formamidase	h2o[c] + frid[c] -> nh3[c] + for[c]	(ATEG_05714)	EM:Nitrogen metabolism;CM:Glyoxylate and dicarboxylate metabolism	3.5.1.49
cyto-c	cytochrome-c oxidase	0.5 o2[m] + 6 h[m] + 2 fero[m] -> h2o[m] + 4 h[c] + 2 feri[m]	(ATEG_01267 and ATEG_09242 and ATEG_05497 and ATEG_09593 and ATEG_04187 and ATEG_08810 and ATEG_07610 and ATEG_01162)	EM:Oxidative phosphorylation	1.9.3.1
f-atpase	ATP synthesis(F type), H+-transporting two-sector ATPase	4.7 h[c] + pi[m] + adp[m] -> h2o[m] + 4.7 h[m] + atp[m]	(ATEG_02551 and ATEG_02525 and ATEG_05175 and ATEG_01173 and ATEG_01830 and ATEG_07609 and ATEG_04777 and ATEG_04767 and ATEG_09616 and ATEG_07080.2 and ATEG_10120 and ATEG_04592 and ATEG_05268 and ATEG_06738)	EM:Oxidative phosphorylation	3.6.3.14
h-atpase	H+-exporting ATPase	h2o[c] + atp[c] + 3 h[c] -> pi[c] + adp[c] + 4 h[e]	(ATEG_01703) or (ATEG_04840) or (ATEG_08057 and ATEG_01703) or (ATEG_08057) or (ATEG_00741)	EM:Oxidative phosphorylation	3.6.3.6
nadh-q cyto	NADH-ubiquinone oxidoreductase	5 h[m] + nadh[c] + q[m] -> 4 h[c] + nad[c] + qh2[m]	(ATEG_00428 and ATEG_01355 and ATEG_01513 and ATEG_02769 and ATEG_02961 and ATEG_03294 and ATEG_03315 and ATEG_03973 and ATEG_04040 and ATEG_06159 and ATEG_06569 and ATEG_06630 and ATEG_06734 and ATEG_06737 and ATEG_06829 and ATEG_06833 and ATEG_06987 and ATEG_07830 and ATEG_07974 and ATEG_09826 and ATEG_09864 and ATEG_00653 and ATEG_01868)	EM:Oxidative phosphorylation	1.6.5.3
nadh-q cyto alter	alternative NADH dehydrogenase	h[c] + nadh[c] + q[m] -> nad[c] + qh2[m]	(ATEG_00394) or (ATEG_00653) or (ATEG_06734)	EM:Oxidative phosphorylation	1.6.99.3
nadh-q mito	NADH-ubiquinone oxidoreductase (respirer chain), complex I	5 h[m] + nadh[m] + q[m] -> nad[m] + 4 h[c] + qh2[m]	(ATEG_00394 and ATEG_00428 and ATEG_01355 and ATEG_01513 and ATEG_02769 and ATEG_02961 and ATEG_03294 and ATEG_03315 and ATEG_03973 and ATEG_04040 and ATEG_06159 and ATEG_06569 and ATEG_06630 and ATEG_06737 and ATEG_06829 and ATEG_06833 and ATEG_06987 and ATEG_07830 and ATEG_07974 and ATEG_09826 and ATEG_09864 and ATEG_00653 and ATEG_01868)	EM:Oxidative phosphorylation	1.6.5.3
nadh-q mito alter	alternative NADH dehydrogenase	h[m] + nadh[m] + q[m] -> nad[m] + qh2[m]	(ATEG_00394) or (ATEG_00653) or (ATEG_06734)	EM:Oxidative phosphorylation	1.6.99.3
q-cyto-c	ubiquinol-cytochrome-c reductase (complex III)	2 h[m] + qh2[m] + 2 feri[m] -> 4 h[c] + q[m] + 2 fero[m]	(ATEG_04885 and ATEG_00550 and ATEG_03455 and ATEG_07615 and cob and ATEG_07992 and ATEG_03941 and ATEG_05551)	EM:Oxidative phosphorylation	1.10.2.2
r0610	Inorganic diphosphatase	h2o[c] + ppi[c] -> h[c] + 2 pi[c]	(ATEG_01632)	EM:Oxidative phosphorylation	3.6.1.1
r0611	Inorganic diphosphatase	h2o[m] + ppi[m] -> h[m] + 2 pi[m]	(ATEG_01632)	EM:Oxidative phosphorylation	3.6.1.1
tr_ca	Ca2+-transporting ATPase	h2o[c] + atp[c] + ca[e] -> h[c] + pi[c] + adp[c] + ca[c]	(ATEG_06777 and ATEG_02899 and ATEG_05265) or (ATEG_07100) or (ATEG_08161 and ATEG_00279) or (ATEG_04598) or (ATEG_09760) or (ATEG_09988 and ATEG_00279) or (ATEG_09988) or (ATEG_00279) or (ATEG_04048)	EM:Oxidative phosphorylation	3.6.3.8
tr_cu	Cu2+-exporting ATPase	h2o[c] + atp[c] + cu[c] -> h[c] + pi[c] + adp[c] + cu[e]	(ATEG_03146 and ATEG_04123) or (ATEG_02507) or (ATEG_04048)	EM:Oxidative phosphorylation	3.6.3.4
tr_k	H+/K+-exchanging ATPase	h2o[c] + atp[c] + k[e] -> pi[c] + adp[c] + h[e] + k[c]	(ATEG_02400) or (ATEG_04343) or (ATEG_04048)	EM:Oxidative phosphorylation	3.6.3.10
r0612	sulfite oxidase	h2o[c] + o2[c] + slfi[c] -> h2o2[c] + h[c] + slf[c]	(ATEG_09176)	EM:Sulfur metabolism	1.8.3.1
r0613	3'(2'),5'-bisphosphate nucleotidase	h2o[c] + paps[c] -> pi[c] + aps[c]	(ATEG_06666)	EM:Sulfur metabolism	3.1.3.7
r0614	Sulfite reductase (NADPH)	3 h2o[c] + 3 nadp[c] + h2s[c] <=> 3 h[c] + 3 nadph[c] + slfi[c]	(ATEG_06651) or (ATEG_02425) or (ATEG_00065) or (ATEG_01555)	EM:Sulfur metabolism	1.8.1.2
r0615	phosphoadenylyl-sulfate reductase (thioredoxin)	rthio[c] + paps[c] -> h[c] + slfi[c] + othio[c] + pap[c]	(ATEG_08764)	EM:Sulfur metabolism	1.8.4.8
r0616	adenylylsulfate reductase	2 h[c] + amp[c] + fad[m] + slfi[c] <=> fadh2[m] + aps[c]	(ATEG_08764)	EM:Sulfur metabolism	1.8.99.2
r0617	sulfate adenylyltransferase	atp[c] + slf[c] -> ppi[c] + aps[c]	(ATEG_08765)	EM:Sulfur metabolism	2.7.7.4
r0618	3'(2'),5'-bisphosphate nucleotidase	h2o[c] + pap[c] -> amp[c] + pi[c]	(ATEG_06666) or (ATEG_10115) or (ATEG_09689)	EM:Sulfur metabolism	3.1.3.7
r0619	3'(2'),5'-bisphosphate nucleotidase	h2o[m] + pap[m] -> pi[m] + amp[m]	(ATEG_08564)	EM:Sulfur metabolism	3.1.3.7
r0620	cystathionine lyase	h2o[c] + llct[c] -> nh3[c] + pyr[c] + hcys[c]	(ATEG_00046) or (ATEG_02246) or (ATEG_02247)	EM:Sulfur metabolism;AA:Cysteine and methionine metabolism	4.4.1.8
ex_13glucan[e]	Glucan exchange	13glucan[e] <=>		ER
ex_1dgali[e]	Galactinol exchange	1dgali[e] <=>		ER
ex_ac[e]	Acetate exchange	ac[e] <=>		ER
ex_ad[e]	Adenine exchange	ad[e] <=>		ER
ex_akg[e]	2-Oxoglutarate exchange	akg[e] <=>		ER
ex_ala[e]	L-Alanine exchange	ala[e] <=>		ER
ex_amp[e]	Adenosine 5'-monophosphate exchange	amp[e] <=>		ER
ex_aol[e]	D-Arabitol exchange	aol[e] <=>		ER
ex_arab[e]	D-Arabinose exchange	arab[e] <=>		ER
ex_arabin[e]	Arabinan exchange	arabin[e] <=>		ER
ex_arg[e]	L-Arginine exchange	arg[e] <=>		ER
ex_asn[e]	L-Asparagine exchange	asn[e] <=>		ER
ex_asp[e]	L-Aspartate exchange	asp[e] <=>		ER
ex_atp[c]	Adenosine 5'-triphosphate exchange	atp[c] <=>		ER
ex_bamn[e]	Benzoylamine exchange	bamn[e] <=>		ER
ex_bdfru[e]	fructose exchange	bdfru[e] <=>		ER
ex_bgal[e]	beta-D-galactose exchange	bgal[e] <=>		ER
ex_blaras[e]	beta-L-Arabinoside exchange	blaras[e] <=>		ER
ex_bn[e]	Benzonitrile exchange	bn[e] <=>		ER
ex_bt[e]	Biotin exchange	bt[e] <=>		ER
ex_c120[e]	C120 exchange	c120[e] <=>		ER		(Kumar and Goswami, 2006)
ex_c140[e]	C140 exchange	c140[e] <=>		ER		(Kumar and Goswami, 2006)
ex_c160[e]	C160 exchange	c160[e] <=>		ER		(Kumar and Goswami, 2006)
ex_c161[e]	C161 exchange	c161[e] <=>		ER		(Kumar and Goswami, 2006)
ex_c180[e]	C180 exchange	c180[e] <=>		ER		(Kumar and Goswami, 2006)
ex_c181[e]	C181 exchange	c181[e] <=>		ER		(Kumar and Goswami, 2006)
ex_c182[e]	C182 exchange	c182[e] <=>		ER		(Kumar and Goswami, 2006)
ex_c183[e]	C183 exchange	c183[e] <=>		ER		(Kumar and Goswami, 2006)
ex_c60[e]	C60 exchange	c60[e] <=>		ER		(Kumar and Goswami, 2006)
ex_c80[e]	C80 exchange	c80[e] <=>		ER		(Kumar and Goswami, 2006)
ex_ca[e]	Ca exchange	ca[e] <=>		ER
ex_cellob[e]	Cellobiose exchange	cellob[e] <=>		ER
ex_cellot[e]	Cellotriose exchange	cellot[e] <=>		ER
ex_cellu[e]	Cellulose exchange	cellu[e] <=>		ER
ex_chit[e]	chitin exchange	chit[e] <=>		ER
ex_cit[e]	Citrate exchange	cit[e] <=>		ER
ex_cln[e]	Choline exchange	cln[e] <=>		ER
ex_co2[e]	CO2 exchange	co2[e] <=>		ER
ex_cyan[e]	cyanate exchange	cyan[e] <=>		ER
ex_cys[e]	L-Cysteine exchange	cys[e] <=>		ER
ex_cyts[e]	cytosine exchange	cyts[e] <=>		ER
ex_dfru[e]	D-Fructose exchange	dfru[e] <=>		ER
ex_dglc[e]	D-Glucose exchange	dglc[e] <=>		ER
ex_doris[e]	Deoxyribose exchange	doris[e] <=>		ER
ex_e4p[e]	D-Erythrose-4-phosphate exchange	e4p[e] ->		ER
ex_epm[e]	Epimelibiose exchange	epm[e] <=>		ER
ex_eth[e]	Ethanol exchange	eth[e] <=>		ER
ex_fe[e]	Fe exchange	fe[e] <=>		ER
ex_for[e]	Formate exchange	for[e] <=>		ER
ex_fum[e]	Fumarate exchange	fum[e] <=>		ER
ex_g15l[e]	Gluconic_acid_lactone exchange	g15l[e] ->		ER
ex_gaba[e]	4-Aminobutanoate exchange	gaba[e] <=>		ER
ex_gal[e]	D-Galactose exchange	gal[e] <=>		ER
ex_gali[e]	Galactitol exchange	gali[e] <=>		ER
ex_galnt[e]	D-Galactonate exchange	galnt[e] <=>		ER
ex_galunt[e]	D-Galacturonate exchange	galunt[e] <=>		ER
ex_gdpman[e]	GDP-mannose exchange	gdpman[e] <=>		ER
ex_geod[c]	geodin exchange	geod[c] ->		ER
ex_ggl[e]	Galactosylglycerol exchange	ggl[e] <=>		ER
ex_gl[e]	Glycerol exchange	gl[e] <=>		ER
ex_glcnt[e]	D-Gluconate exchange	glcnt[e] <=>		ER
ex_gln[e]	L-Glutamine exchange	gln[e] <=>		ER
ex_glu[e]	L-Glutamate exchange	glu[e] <=>		ER
ex_gly[e]	Glycine exchange	gly[e] <=>		ER
ex_glycogen[e]	Glycogen exchange	glycogen[e] <=>		ER
ex_gn[e]	Guanine exchange	gn[e] <=>		ER
ex_gua[e]	Guaiacol exchange	gua[e] ->		ER
ex_h[e]	H+ exchange	h[e] <=>		ER
ex_h2o[e]	Water exchange	h2o[e] <=>		ER
ex_hisan[e]	Hisamine exchange	hisan[e] <=>		ER
ex_hno3[e]	nitrate exchange	hno3[e] <=>		ER
ex_i5p[e]	Inositol 1,3,4,5,6-pentakisphosphate	i5p[e] <=>		ER
ex_i5p2[e]	Inositol 1,2,4,5,6-pentakisphosphate exchange	i5p2[e] <=>		ER
ex_i6p[e]	Phytate exchange	i6p[e] <=>		ER
ex_ia[e]	Itaconate exchange	ia[e] ->		ER
ex_icit[e]	Isocitrate exchange	icit[e] <=>		ER
ex_idol[e]	L-iditol exchange	idol[e] <=>		ER
ex_ile[e]	L-Isoleucine exchange	ile[e] <=>		ER
ex_imlt[e]	Isomaltose exchange	imlt[e] <=>		ER
ex_ins[e]	myo-inositol exchange	ins[e] ->		ER		(Kumar et al., 2010)
ex_k[e]	K exchange	k[e] <=>		ER
ex_lac[e]	D-Lactate exchange	lac[e] <=>		ER
ex_lact[e]	Lactose exchange	lact[e] <=>		ER
ex_larab[e]	L-Arabinose exchange	larab[e] <=>		ER
ex_leu[e]	L-Leucine exchange	leu[e] <=>		ER
ex_llac[e]	L-Lactate exchange	llac[e] <=>		ER
ex_lovst[e]	lovastatin exchange	lovst[c] ->		ER
ex_lxul[e]	L-Xylulose exchange	lxul[e] <=>		ER
ex_lys[e]	L-Lysine exchange	lys[e] <=>		ER
ex_mal[e]	(S)-Malate exchange	mal[e] <=>		ER
ex_man[e]	D-Mannose exchange	man[e] <=>		ER
ex_mannan[e]	Mannan exchange	mannan[e] <=>		ER
ex_meli[e]	melibiose exchange	meli[e] <=>		ER
ex_melt[e]	Melibiitol exchange	melt[e] <=>		ER
ex_met[e]	L-Methionine exchange	met[e] <=>		ER
ex_meth[e]	Methanol exchange	meth[e] <=>		ER
ex_mlt[e]	Maltose exchange	mlt[e] <=>		ER
ex_mnt[e]	D-Mannitol exchange	mnt[e] <=>		ER
ex_msali[e]	6-methysalicylate acid exchange	msali[e] <=>		ER
ex_na[e]	Na exchange	na[e] <=>		ER
ex_nh3[e]	ammonia exchange	nh3[e] <=>		ER
ex_o2[e]	O2 exchange	o2[e] <=>		ER
ex_ota[e]	Ochratoxin A exchange	ota[e] ->		ER
ex_oxal[e]	Oxalate exchange	oxal[e] <=>		ER
ex_phe[e]	L-Phenylalanine exchange	phe[e] <=>		ER
ex_pi[e]	phosphate exchange	pi[e] <=>		ER
ex_pnto[e]	(R)-Pantothenate exchange	pnto[e] <=>		ER
ex_pro[e]	L-Proline exchange	pro[e] <=>		ER
ex_ptate[e]	Pectate exchange	ptate[e] <=>		ER
ex_pyr[e]	Pyruvate exchange	pyr[e] <=>		ER
ex_qt[e]	Quinate exchange	qt[e] <=>		ER
ex_r5p[e]	D-Ribose-5-phosphate exchange	r5p[e] ->		ER
ex_raff[e]	Raffinose exchange	raff[e] <=>		ER
ex_rib[e]	D-Ribose exchange	rib[e] <=>		ER
ex_rl[e]	D-Ribulose exchange	rl[e] <=>		ER
ex_sali[e]	Salicylate exchange	sali[e] <=>		ER
ex_ser[e]	L-Serine exchange	ser[e] <=>		ER
ex_sihm[e]	Siroheme exchange	sihm[e] ->		ER
ex_slf[e]	Sulfate exchange	slf[e] <=>		ER
ex_slfi[e]	Sulfite efflux	slfi[e] ->		ER
ex_sor[e]	L-Sorbose exchange	sor[e] <=>		ER
ex_sot[e]	D-Sorbitol exchange	sot[e] <=>		ER
ex_stac[e]	Stachyose exchange	stac[e] <=>		ER
ex_star[e]	Starch exchange	star[e] <=>		ER
ex_suc[e]	Sucrose exchange	suc[e] <=>		ER
ex_succ[e]	Succinate exchange	succ[e] <=>		ER
ex_thr[e]	L-Threonine exchange	thr[e] <=>		ER
ex_trp[e]	L-Tryptophan exchange	trp[e] <=>		ER
ex_tyr[e]	L-Tyrosine exchange	tyr[e] <=>		ER
ex_ura[e]	Uracil exchange	ura[e] <=>		ER
ex_urate[e]	urate exchange	urate[e] <=>		ER		(Kumar et al., 2010)
ex_urea[e]	Urea exchange	urea[e] <=>		ER
ex_uri[e]	uridine exchange	uri[e] <=>		ER
ex_val[e]	L-Valine exchange	val[e] <=>		ER
ex_vb2[e]	VB2 exchange	vb2[e] ->		ER
ex_ve[e]	VE exchange	ve[e] <=>		ER
ex_xol[e]	Xylitol exchange	xol[e] <=>		ER
ex_xul[e]	D-Xylulose exchange	xul[e] <=>		ER
ex_xyl[e]	D-Xylose exchange	xyl[e] <=>		ER
ex_xylan[e]	Xylan exchange	xylan[e] <=>		ER
r0621	acyl-CoA dehydrogenase	h[m] + fad[m] + c180coa[m] -> fadh2[m] + c18dcoa[m]	(ATEG_06288) or (ATEG_06308)	LM	1.3.99.13
r0622	acyl-CoA dehydrogenase	h[m] + fad[m] + c160coa[m] -> fadh2[m] + c16dcoa[m]	(ATEG_06288) or (ATEG_06308)	LM	1.3.99.13
r0623	acyl-CoA dehydrogenase	h[m] + fad[m] + c140coa[m] -> fadh2[m] + c14dcoa[m]	(ATEG_06288) or (ATEG_06308)	LM	1.3.99.13
r0624	acyl-CoA dehydrogenase	h[m] + fad[m] + c120coa[m] -> fadh2[m] + c12dcoa[m]	(ATEG_06288) or (ATEG_06308)	LM	1.3.99.13
r0625	acyl-CoA dehydrogenase	h[m] + fad[m] + c100coa[m] -> fadh2[m] + c10dcoa[m]	(ATEG_06288) or (ATEG_06308)	LM	1.3.99.13
r0626	acyl-CoA dehydrogenase	h[m] + fad[m] + c80coa[m] -> fadh2[m] + c8dcoa[m]	(ATEG_06288) or (ATEG_06308)	LM	1.3.99.13
r0627	Phospholipid-translocating ATPase	h2o[m] + atp[m] + pe[m] -> h[m] + pi[m] + adp[m] + pe[c]	(ATEG_00708) or (ATEG_09726 and ATEG_07244 and ATEG_00708 and ATEG_07054)	LM	3.6.3.1
r0628	Phospholipid-translocating ATPase	h2o[m] + atp[m] + ps[m] -> h[c] + pi[m] + adp[m] + ps[c]	(ATEG_00708) or (ATEG_09726 and ATEG_07244 and ATEG_00708 and ATEG_07054)	LM	3.6.3.1
r0629	Phospholipid-translocating ATPase	h2o[m] + atp[m] + pg[m] -> h[c] + pi[m] + adp[m] + pg[c]	(ATEG_00708) or (ATEG_09726 and ATEG_07244 and ATEG_00708 and ATEG_07054)	LM	3.6.3.1
r0630	Phospholipid-translocating ATPase	h2o[m] + atp[m] + pa[m] -> h[m] + pi[m] + adp[m] + pa[c]	(ATEG_00708) or (ATEG_09726 and ATEG_07244 and ATEG_00708 and ATEG_07054)	LM	3.6.3.1
r0631	lysophosphatidylcholine acyltransferase	lpc[c] + acylcoa[c] -> 2 h[c] + coa[c] + pc[c]	(ATEG_06961)	LM	2.3.1.23
r0632	lysophosphatidylcholine acyltransferase	lpe[c] + acylcoa[c] -> coa[c] + pe[c]	(ATEG_06961)	LM	2.3.1.23
r0633	Spontaneous conversion_from aory	nh4oh[c] + pa[c] -> h2o[c] + paa[c]		LM
r0634	Diacylglycerol O-acyltransferase	dagly[c] + acylcoa[c] -> coa[c] + tagly[c]	(ATEG_09676)	LM	2.3.1.20
r0635	Phospholipid diacylglycerol acyltransferase	2 h[c] + dagly[c] + pc[c] -> lpc[c] + tagly[c]	(ATEG_04517)	LM	2.3.1.158
r0636	Phospholipid diacylglycerol acyltransferase	dagly[c] + pe[c] -> tagly[c] + lpe[c]	(ATEG_04517)	LM	2.3.1.158
r0637	Phospholipid diacylglycerol acyltransferase	dagly[c] + paa[c] -> tagly[c] + lpaa[c]	(ATEG_04517)	LM	2.3.1.158
r0638	Phospholipid diacylglycerol acyltransferase	dagly[c] + ps[c] -> tagly[c] + lps[c]	(ATEG_04517)	LM	2.3.1.158
r0639	Phospholipid diacylglycerol acyltransferase	dagly[c] + pdme[c] -> tagly[c] + lpdme[c]	(ATEG_04517)	LM	2.3.1.158
r0640	Phospholipid diacylglycerol acyltransferase	dagly[c] + pmme[c] -> tagly[c] + lpmme[c]	(ATEG_04517)	LM	2.3.1.158
r0641	Phospholipid diacylglycerol acyltransferase	dagly[c] + pg[c] -> tagly[c] + lpg[c]	(ATEG_04517)	LM	2.3.1.158
r0642	Triacylglycerol lipase	h2o[c] + tagly[c] + acp[c] -> dagly[c] + acylacp[c]	(ATEG_02238)	LM	3.1.1.3
r0643	Triacylglycerol lipase	h2o[c] + dagly[c] + acp[c] -> acylacp[c] + magly[c]	(ATEG_02238)	LM	3.1.1.3
r0644	Acylglycerol lipase	h2o[c] + magly[c] -> gl[c] + ffa[c]		LM	3.1.1.23
r0645	acylglycerol kinase	atp[c] + magly[c] -> h[c] + adp[c] + agl3p[c]	(ATEG_00294)	LM	2.7.1.94
r0646	glycerol-3-phosphate dehydrogenase (NAD+)	h[c] + nadh[c] + t3p2[c] -> nad[c] + gl3p[c]	(ATEG_02234) or (ATEG_04878)	LM	1.1.1.8
r0647	glycerol-3-phosphate dehydrogenase	h[m] + fad[m] + gl3p[m] -> fadh2[m] + t3p2[m]	(ATEG_08500) or (ATEG_09887)	LM	1.1.5.3
r0648	phospholipid:diacylglycerol acyltransferase	2 h[c] + dagly[c] + pc[c] -> lpc[c] + tagly[c]	(ATEG_04517)	LM	2.3.1.158
r0649	diacylglycerol O-acyltransferase	dagly[c] + 0.354 c182acp[c] + 0.032 c183acp[c] + 0.026 c180acp[c] + 0.374 c181acp[c] + 0.024 c120acp[c] + 0.154 c160acp[c] + 0.02 c161acp[c] + 0.013 c140acp[c] + 0.012 c141acp[c] -> tagly[c] + acp[c]	(ATEG_09676)	LM	2.3.1.20
r0650	Glycerol kinase	atp[c] + gl[c] -> h[c] + adp[c] + gl3p[c]	(ATEG_03925) or (ATEG_05802)	LM	2.7.1.30
r0651	triacylglycerol lipase	h2o[c] + tagly[c] -> dagly[c] + 0.026 c180[c] + 0.374 c181[c] + 0.354 c182[c] + 0.032 c183[c] + 0.024 c120[c] + 0.154 c160[c] + 0.02 c161[c] + 0.013 c140[c] + 0.012 c141[c]	(ATEG_01201) or (ATEG_07184) or (ATEG_03550) or (ATEG_04985) or (ATEG_06244) or (ATEG_07426) or (ATEG_08536)	LM	3.1.1.3
r0652	triacylglycerol lipase	h2o[c] + dagly[c] -> magly[c] + 0.026 c180[c] + 0.374 c181[c] + 0.354 c182[c] + 0.032 c183[c] + 0.024 c120[c] + 0.154 c160[c] + 0.02 c161[c] + 0.013 c140[c] + 0.012 c141[c]	(ATEG_01201) or (ATEG_07184) or (ATEG_03550) or (ATEG_04985) or (ATEG_06244) or (ATEG_07426) or (ATEG_08536)	LM	3.1.1.3
r0653	glycerol-1-phosphatase	h2o[c] + gl3p[c] -> pi[c] + gl[c]	(ATEG_00249)	LM	3.1.3.21
r0654	Phospholipase C	h2o[e] + pc[e] -> h[e] + pcln[e] + dagly[e]	(ATEG_02999) or (ATEG_06875) or (ATEG_09079)	LM	3.1.4.3
r0655	Phospholipase C	h2o[e] + pe[e] -> h[e] + dagly[e] + pea[e]	(ATEG_02999) or (ATEG_06875) or (ATEG_09079)	LM	3.1.4.3
r0656	Glycerol dehydrogenase	nad[c] + gl[c] -> h[c] + nadh[c] + glyn[c]	(ATEG_03892) or (ATEG_04455)	LM	1.1.1.6
r0657	Glycerol dehydrogenase	h[c] + nadph[c] + glyal[c] -> nadp[c] + gl[c]	(ATEG_03892) or (ATEG_04455)	LM	1.1.1.72
r0658	glycerone-phosphate O-acyltransferase	gl3p[c] + acylacpp[c] -> acp[c] + agl3p[c]	(ATEG_03943) or (ATEG_07697)	LM	2.3.1.15
r0659	glycerone-phosphate O-acyltransferase	t3p2[c] + acylacpp[c] -> acp[c] + at3p2[c]	(ATEG_03943) or (ATEG_07697)	LM	2.3.1.15
r0660	glycerone-phosphate O-acyltransferase	t3p2[c] + 0.40469 c182acp[c] + 0.211 c183acp[c] + 0.00313 c180acp[c] + 0.14598 c181acp[c] + 0.00079 c120acp[c] + 0.00093 c160acp[c] + 0.21661 c161acp[c] + 0.01686 c140acp[c] -> acp[c] + at3p2[c]	(ATEG_03943) or (ATEG_07697)	LM	2.3.1.15
r0661	glycerone-phosphate O-acyltransferase	0.40469 c182acp[c] + 0.211 c183acp[c] + 0.00313 c180acp[c] + 0.14598 c181acp[c] + 0.00079 c120acp[c] + 0.00093 c160acp[c] + 0.21661 c161acp[c] + 0.01686 c140acp[c] + gl3p[c] -> acp[c] + agl3p[c]	(ATEG_03943) or (ATEG_07697)	LM	2.3.1.15
r0662	diacylglycerol cholinephosphotransferase	dagly[c] + cdpcln[c] -> h[c] + cmp[c] + pc[c]	(ATEG_08754) or (ATEG_00116)	LM	2.7.8.2
r0663	cholinesterase	h2o[e] + accln[e] -> h[e] + cln[e] + ac[e]	(ATEG_10345) or (ATEG_09944) or (ATEG_06108) or (ATEG_04042) or (ATEG_02666) or (ATEG_02238) or (ATEG_01787) or (ATEG_01567)	LM	3.1.1.7;3.1.1.8
r0664	phosphatidylserine decarboxylase	ps[m] -> co2[m] + pe[m]	(ATEG_04035) or (ATEG_05218) or (ATEG_01807)	LM	4.1.1.65
r0665	phosphatidyl-N-methylethanolamine N-methyltransferase	2 sam[c] + pcpmme[c] -> 2 h[c] + 2 sah[c] + pc[c]		LM	2.1.1.71
r0666	phosphatidylethanolamine N-methyltransferase	sam[c] + pe[c] -> h[c] + sah[c] + pcpmme[c]	(ATEG_02347)	LM	2.1.1.17
r0667	choline kinase	atp[c] + cln[c] -> h[c] + adp[c] + pcln[c]	(ATEG_05193)	LM	2.7.1.32
r0668	phosphatidylglycerophosphatase	h2o[m] + h[m] + pgp[m] -> pi[m] + pg[m]	(ATEG_00706)	LM	3.1.3.27
r0669	monolysocardiolipin acyltransferase	2 h[c] + acylcoa[c] + mlcl[c] -> coa[c] + cl[c]	(ATEG_01384)	LM	2.3.1.-
r0670	cardiolipin-specific phospholipase	h2o[m] + cl[m] -> mlcl[m] + ffa[m]	(ATEG_03820)	LM	3.1.1.-
r0671	glycerophosphoryl diester phosphodiesterase	h2o[m] + glypcln[m] -> h[m] + gl3p[m] + cln[m]	(ATEG_04940)	LM	3.1.4.46
r0672	glycerophosphoryl diester phosphodiesterase	h2o[e] + glypcln[e] -> h[e] + cln[e] + gl3p[e]	(ATEG_04940)	LM	3.1.4.46
r0673	glycerophosphoryl diester phosphodiesterase	h2o[c] + glypeln[c] -> h[c] + gl3p[c] + ethla[c]	(ATEG_04940)	LM	3.1.4.46
r0674	ethanolamine kinase	atp[c] + ethla[c] -> h[c] + adp[c] + pea[c]	(ATEG_00346)	LM	2.7.1.82
r0675	phosphatidylserine synthase 1	ser[c] + pc[c] -> ps[c] + cl[c]	(ATEG_07014)	LM	2.7.8.-
r0676	cardiolipin synthase	cdpdg[c] + pg[c] -> 2 h[c] + cmp[c] + cl[c]	(ATEG_09374)	LM	2.7.8.-
r0677	Acylglycerone-phosphate reductase	h[c] + nadph[c] + at3p2[c] -> nadp[c] + agl3p[c]	(ATEG_01260) or (ATEG_03192) or (ATEG_04978) or (ATEG_05407)	LM	1.1.1.101
r0678	glycerol-3-phosphate O-acyltransferase	t3p2[c] + acylcoa[c] -> coa[c] + at3p2[c]	(ATEG_07697) or (ATEG_03943)	LM	2.3.1.42
r0679	lysophosphatidic acid-acyltransferase	agl3p[c] + acylacpp[c] -> acp[c] + pa[c]	(ATEG_09696)	LM	2.3.1.51
r0680	lysophosphatidic acid-acyltransferase	2 h[c] + acylcoa[c] + agl3p[c] -> coa[c] + pa[c]	(ATEG_09696)	LM	2.3.1.51
r0681	1-phosphatidylinositol 4-kinase	atp[c] + h[c] + pins[c] -> adp[c] + pins4p[c]	(ATEG_01311) or (ATEG_02852)	LM	2.7.1.67
r0682	1-phosphatidylinositol-4-phosphate 5-kinase	atp[c] + h[c] + pins4p[c] -> adp[c] + d45pi[c]	(ATEG_08862)	LM	2.7.1.68
r0683	ethanolamine-phosphate cytidylyltransferase	pea[c] + ctp[c] -> ppi[c] + cdpea[c]	(ATEG_06826)	LM	2.7.7.14
r0684	choline-phosphate cytidylyltransferase	ctp[m] + pcln[m] -> ppi[m] + cdpcln[m]	(ATEG_08555)	LM	2.7.7.15
r0685	phosphatidate cytidylyltransferase	pa[c] + ctp[c] <=> ppi[c] + cdpdg[c]	(ATEG_02635)	LM	2.7.7.41
r0686	ethanolaminephosphotransferase	dagly[c] + cdpea[c] -> h[c] + cmp[c] + pe[c]	(ATEG_08754) or (ATEG_05636)	LM	2.7.8.1
r0687	phosphatidylserine synthase	ser[c] + cdpdg[c] <=> 2 h[c] + cmp[c] + ps[c]	(ATEG_03249)	LM	2.7.8.8
r0688	Phosphatidylcholine 1-acylhydrolase;Phospholipase A	h2o[c] + h[c] + pc[c] -> lpc[c] + carbo[c]	(ATEG_02420)	LM	3.1.1.32
r0689	Lysophospholipase	h2o[c] + lpc[c] -> 3 h[c] + carbo[c] + glypcln[c]	(ATEG_03524) or (ATEG_05327) or (ATEG_09269)	LM	3.1.1.5
r0690	Lysophospholipase	h2o[c] + lpe[c] -> h[c] + carbo[c] + glypeln[c]	(ATEG_03524) or (ATEG_05327) or (ATEG_09269) or (ATEG_04807)	LM	3.1.1.5
r0691	Diacylglycerol pyrophosphate phosphatase	h2o[c] + pa[c] -> 2 h[c] + pi[c] + dagly[c]	(ATEG_05952) or (ATEG_05318)	LM	3.1.3.4:3.1.3.-
r0692	Phosphoinositide phospholipase C	h2o[c] + d45pi[c] -> 6 h[c] + tpi[c] + dagly[c]	(ATEG_00526) or (ATEG_01681)	LM	3.1.4.11
r0693	Phospholipase D	h2o[c] + h[c] + pc[c] -> cln[c] + pa[c]	(ATEG_02288) or (ATEG_06366) or (ATEG_08972) or (ATEG_08973)	LM	3.1.4.4
r0694	Phospholipase D	h2o[c] + h[c] + pe[c] -> pa[c] + ethla[c]	(ATEG_02288) or (ATEG_06366) or (ATEG_08972) or (ATEG_08973)	LM	3.1.4.4
r0695	phosphatidylserine decarboxylase	ps[c] -> co2[c] + pe[c]	(ATEG_04035) or (ATEG_05218) or (ATEG_09260)	LM	4.1.1.65
r0696	CDP-diacylglycerol-glycerol-3-phosphate 3-phosphatidyltransferase	gl3p[m] + cdpdg[m] -> 3 h[m] + pgp[m] + cmp[m]	(ATEG_09374)	LM	2.7.8.5
r0697	phospholipase A2	pc[c] + acp[c] -> lpc[c] + acylacpp[c]	(ATEG_01134) or (ATEG_04966) or (ATEG_05342) or (ATEG_03430) or (ATEG_05353)	LM	3.1.1.4
r0698	phospholipase A2	pe[c] + acp[c] -> lpe[c] + acylacpp[c]	(ATEG_01134) or (ATEG_04966) or (ATEG_05342) or (ATEG_03430) or (ATEG_05353)	LM	3.1.1.4
r0699	Acyl-CoA-dependent ceramide synthase	acylcoa[c] + sph[c] -> h[c] + coa[c] + dcer2[c]	(ATEG_02488)	LM	2.3.1.24
r0700	sphingosine kinase	atp[c] + sphe[c] -> h[c] + adp[c] + sphep[c]	(ATEG_00294)	LM	2.7.1.91
r0701	3-sn-phosphatidate phosphohydrolase	h2o[c] + sphep[c] -> pi[c] + sphe[c]	(ATEG_06116) or (ATEG_05318) or (ATEG_05952)	LM	3.1.3.4:3.1.3.-
r0702	sphinganine-1-phosphate aldolase	sphep[c] -> pea[c] + c16e[c]	(ATEG_06229) or (ATEG_00907)	LM	4.1.2.27
r0703	alkaline ceramidase	h2o[e] + pcer2[e] -> psph[e]	(ATEG_02976)	LM	3.5.1.23
r0704	neutral ceramidase	h2o[e] + cer1[e] -> sphe[e]	(ATEG_02976)	LM	3.5.1.23
r0705	C4-hydroxylase	o2[c] + h[c] + nadph[c] + dcer2[c] -> h2o[c] + nadp[c] + pcer2[c]	(ATEG_05212)	LM	1.14.-.-
r0706	C4-hydroxylase	o2[c] + h[c] + nadph[c] + sph[c] -> h2o[c] + nadp[c] + psph[c]	(ATEG_05110) or (ATEG_08170)	LM	1.14.-
r0707	sphingolipid delta-4 desaturase	dcer2[c] -> 2 h[c] + cer1[c]	(ATEG_05539)	LM	1.14.-.-
r0708	3-Dehydrosphinganine reductase	h[c] + nadph[c] + dhsph[c] -> nadp[c] + sph[c]	(ATEG_00316)	LM	1.1.1.102
r0709	serine palmitoyltransferase	h[c] + ser[c] + c160coa[c] -> co2[c] + coa[c] + dhsph[c]	(ATEG_00388) or (ATEG_03027) or (ATEG_03279)	LM	2.3.1.50
r0710	MIP2C synthase	pins[c] + mipc[c] -> h2o[c] + mip2c[c]	(ATEG_04518)	LM	2.4.1.-
r0711	Sphinganine kinase	atp[c] + sph[c] -> h[c] + adp[c] + dhsp[c]	(ATEG_00294) or (ATEG_06228)	LM	2.7.1.91
r0712	Sphinganine kinase	atp[c] + psph[c] -> h[c] + adp[c] + phsp[c]	(ATEG_00294) or (ATEG_06228)	LM	2.7.1.91
r0713	3-sn-phosphatidate phosphohydrolase	h2o[c] + dhsp[c] -> pi[c] + sph[c]	(ATEG_06116)	LM	3.1.3.4:3.1.3.-
r0714	Sphingomyelin phosphodiesterase	h2o[e] + spmylin[e] -> 2 h[e] + pcln[e] + cer1[e]	(ATEG_08206)	LM	3.1.4.12
r0715	Arylsulfatase	h2o[c] + suft[c] -> 2 h[c] + slf[c] + galcer[c]	(ATEG_01981) or (ATEG_05375)	LM	3.1.6.1
r0716	Sphinganine-1-phosphate aldolase	dhsp[c] -> pea[c] + c16a[c]	(ATEG_00907) or (ATEG_06229)	LM	4.1.2.27
r0717	Sphinganine-1-phosphate aldolase	2 h[c] + phsp[c] -> h2o[c] + pea[c] + c16a[c]	(ATEG_00907) or (ATEG_06229)	LM	4.1.2.27
r0718	sphingosine N-acyltransferase	c180coa[c] + psph[c] -> coa[c] + cerb1a[c]	(ATEG_02488)	LM	2.3.1.24
r0719	sphingosine N-acyltransferase	c181coa[c] + psph[c] -> coa[c] + cerb1b[c]	(ATEG_02488)	LM	2.3.1.24
r0720	sphingosine N-acyltransferase	c180coa[c] + sph[c] -> coa[c] + cerb2a[c]	(ATEG_02488)	LM	2.3.1.24
r0721	sphingosine N-acyltransferase	c180coa[c] + psph[c] -> coa[c] + cerb1c[c]	(ATEG_02488)	LM	2.3.1.24
r0722	sphingosine N-acyltransferase	c181coa[c] + sph[c] -> coa[c] + cerb2b[c]	(ATEG_02488)	LM	2.3.1.24
r0723	sphingosine N-acyltransferase	c181coa[c] + psph[c] -> coa[c] + cerb1d[c]	(ATEG_02488)	LM	2.3.1.24
r0724	sphingosine N-acyltransferase	c180coa[c] + sph[c] -> coa[c] + cerb2c[c]	(ATEG_02488)	LM	2.3.1.24
r0725	sphingosine N-acyltransferase	c181coa[c] + sph[c] -> coa[c] + cerb2d[c]	(ATEG_02488)	LM	2.3.1.24
r0726	sphingosine N-acyltransferase	c180coa[c] + sph[c] -> coa[c] + cereb1[c]	(ATEG_02488)	LM	2.3.1.24
r0727	ceramide glucosyltransferase	udpg[c] + cereb1[c] -> udp[c] + glucer1[c]	(ATEG_06496)	LM	2.4.1.80
r0728	sphingosine N-acyltransferase	c181coa[c] + sph[c] -> coa[c] + cereb2[c]	(ATEG_02488)	LM	2.3.1.24
r0729	ceramide glucosyltransferase	udpg[c] + cereb2[c] -> udp[c] + glucer2[c]	(ATEG_06496)	LM	2.4.1.80
r0730	Acyl-[acp] formation (for phospholipids)	0.22419 c182acp[c] + 0.07492 c183acp[c] + 0.0837 c180acp[c] + 0.2352 c181acp[c] + 0.15047 c120acp[c] + 0.19543 c160acp[c] -> acylacpp[c]		LM:Acyl-ACP formation
r0731	Acyl-[acp] formation	0.6673 c182acp[c] + 0.0404 c183acp[c] + 0.0304 c180acp[c] + 0.1534 c181acp[c] + 0.272 c160acp[c] + 0.0051 c161acp[c] -> acylacp[c]		LM:Acyl-ACP formation
r0732	gamma-glutamyltransferase	ala[c] + gsh[c] -> alagly[c] + cgly[c]	(ATEG_04362) or (ATEG_03241)	LM:Arachidonic acid metabolism	2.3.2.2
r0733	Stearoyl-CoA 12-desaturase	o2[c] + h[c] + nadh[c] + c182acp[c] -> 2 h2o[c] + nad[c] + c183acp[c]	(ATEG_00444) or (ATEG_09211)	LM:Biosynthesis of unsaturated fatty acids	1.14.19.1
r0734	Acetyl-CoA carboxylase	accoa[c] + cbccp[c] <=> malcoa[c] + bccp[c]	(ATEG_09702)	LM:Fatty acid biosynthesis	6.4.1.2
r0735	Acetyl coenzyme A-acyl-carrier-protein transacylase	c14hacp[c] <=> h2o[c] + c14dacp[c]	(ATEG_04258 and ATEG_04259) or (ATEG_08667) or (ATEG_08668)	LM:Fatty acid biosynthesis	4.2.1.61 2.3.1.86
r0736	3-oxoacyl-[ACP] reductase	h[c] + nadph[c] + c16oacp[c] <=> nadp[c] + c16hacp[c]	(ATEG_01141) or (ATEG_04317) or (ATEG_00170) or (ATEG_08633) or (ATEG_02020) or (ATEG_10354)	LM:Fatty acid biosynthesis	1.1.1.100
r0737	Acetyl coenzyme A-acyl-carrier-protein transacylase	c16hacp[c] <=> h2o[c] + c16dacp[c]	(ATEG_04258 and ATEG_04259) or (ATEG_08667) or (ATEG_08668)	LM:Fatty acid biosynthesis	4.2.1.61 2.3.1.86
r0738	Acetyl coenzyme A-acyl-carrier-protein transacylase	c18hacp[c] <=> h2o[c] + c18dacp[c]	(ATEG_04258 and ATEG_04259) or (ATEG_08667) or (ATEG_08668)	LM:Fatty acid biosynthesis	4.2.1.61 2.3.1.86
r0739	Fatty-acid synthase	2 h[c] + 2 nadph[c] + c40acp[c] + malacp[c] -> h2o[c] + co2[c] + 2 nadp[c] + acp[c] + c60acp[c]	(ATEG_08668) or (ATEG_04259) or (ATEG_08172) or (ATEG_01894) or (ATEG_00913)	LM:Fatty acid biosynthesis	2.3.1.85
r0740	oleoyl-[ACP] hydrolase	h2o[c] + c40acp[c] -> h[c] + acp[c] + c40[c]	(ATEG_04258)	LM:Fatty acid biosynthesis	3.1.2.14
r0741	oleoyl-[ACP] hydrolase	h2o[c] + c60acp[c] -> h[c] + acp[c] + c60[c]	(ATEG_04258)	LM:Fatty acid biosynthesis	3.1.2.14
r0742	oleoyl-[ACP] hydrolase	h2o[c] + c80acp[c] -> h[c] + acp[c] + c80[c]	(ATEG_04258)	LM:Fatty acid biosynthesis	3.1.2.14
r0743	oleoyl-[ACP] hydrolase	h2o[c] + c100acp[c] -> h[c] + acp[c] + c100[c]	(ATEG_04258)	LM:Fatty acid biosynthesis	3.1.2.14
r0744	oleoyl-[ACP] hydrolase	h2o[c] + c180acp[c] -> h[c] + acp[c] + c180[c]	(ATEG_04258)	LM:Fatty acid biosynthesis	3.1.2.14
r0745	oleoyl-[ACP] hydrolase	h2o[c] + c181acp[c] -> h[c] + acp[c] + c181[c]	(ATEG_04258)	LM:Fatty acid biosynthesis	3.1.2.14
r0746	oleoyl-[ACP] hydrolase	h2o[c] + c182acp[c] -> h[c] + acp[c] + c182[c]	(ATEG_04258)	LM:Fatty acid biosynthesis	3.1.2.14
r0747	oleoyl-[ACP] hydrolase	h2o[c] + c183acp[c] -> h[c] + acp[c] + c183[c]	(ATEG_04258)	LM:Fatty acid biosynthesis	3.1.2.14
r0748	oleoyl-[ACP] hydrolase	h2o[c] + c120acp[c] -> h[c] + acp[c] + c120[c]	(ATEG_04258)	LM:Fatty acid biosynthesis	3.1.2.14
r0749	Fatty-acid synthase	2 h[c] + 2 nadph[c] + malacp[c] + acacp[c] -> h2o[c] + co2[c] + 2 nadp[c] + acp[c] + c40acp[c]	(ATEG_08668) or (ATEG_04259) or (ATEG_08172) or (ATEG_01894) or (ATEG_00913)	LM:Fatty acid biosynthesis	2.3.1.85
r0750	oleoyl-[ACP] hydrolase	h2o[c] + c140acp[c] -> h[c] + acp[c] + c140[c]	(ATEG_04258)	LM:Fatty acid biosynthesis	3.1.2.14
r0751	oleoyl-[ACP] hydrolase	h2o[c] + c160acp[c] -> h[c] + acp[c] + c160[c]	(ATEG_04258)	LM:Fatty acid biosynthesis	3.1.2.14
r0752	oleoyl-[ACP] hydrolase	h2o[c] + c161acp[c] -> h[c] + acp[c] + c161[c]	(ATEG_04258)	LM:Fatty acid biosynthesis	3.1.2.14
r0753	oleoyl-[ACP] hydrolase	h2o[c] + c162acp[c] -> h[c] + acp[c] + c162[c]	(ATEG_04258)	LM:Fatty acid biosynthesis	3.1.2.14
r0754	3-oxoacyl-[ACP] reductase	h[c] + nadph[c] + c8oacp[c] <=> nadp[c] + c8hacp[c]	(ATEG_01052 and ATEG_07700 and ATEG_09010) or (ATEG_01141) or (ATEG_04317) or (ATEG_00170) or (ATEG_08633) or (ATEG_02020) or (ATEG_10354)	LM:Fatty acid biosynthesis	1.1.1.100
r0755	Biotin carboxylase	h2o[c] + atp[c] + co2[c] + bccp[c] -> 2 h[c] + pi[c] + adp[c] + cbccp[c]	(ATEG_09702)	LM:Fatty acid biosynthesis	6.3.4.14
r0756	3-oxoacyl-[ACP] reductase	h[c] + nadph[c] + c10oacp[c] <=> nadp[c] + c10hacp[c]	(ATEG_01052 and ATEG_07700 and ATEG_09010) or (ATEG_01141) or (ATEG_04317) or (ATEG_00170) or (ATEG_08633) or (ATEG_02020) or (ATEG_10354)	LM:Fatty acid biosynthesis	1.1.1.100
r0757	3-oxoacyl-[ACP] reductase	h[c] + nadph[c] + c12oacp[c] <=> nadp[c] + c12hacp[c]	(ATEG_01052 and ATEG_07700 and ATEG_09010) or (ATEG_01141) or (ATEG_04317) or (ATEG_00170) or (ATEG_08633) or (ATEG_02020) or (ATEG_10354)	LM:Fatty acid biosynthesis	1.1.1.100
r0758	3-oxoacyl-[ACP] reductase	h[c] + nadph[c] + c14oacp[c] <=> nadp[c] + c14hacp[c]	(ATEG_01052 and ATEG_07700 and ATEG_09010) or (ATEG_01141) or (ATEG_04317) or (ATEG_00170) or (ATEG_08633) or (ATEG_02020) or (ATEG_10354)	LM:Fatty acid biosynthesis	1.1.1.100
r0759	3-oxoacyl-[ACP] reductase	h[c] + nadph[c] + c18oacp[c] <=> nadp[c] + c18hacp[c]	(ATEG_01052 and ATEG_07700 and ATEG_09010) or (ATEG_01141) or (ATEG_04317) or (ATEG_00170) or (ATEG_08633) or (ATEG_02020) or (ATEG_10354)	LM:Fatty acid biosynthesis	1.1.1.100
r0760	enoyl-[ACP] reductase (NADH)	nadp[c] + c40acp[c] <=> h[c] + nadph[c] + c4dacp[c]	(ATEG_06490) or (ATEG_01213) or (ATEG_04419) or (ATEG_05412) or (ATEG_08264) or (ATEG_04258)	LM:Fatty acid biosynthesis	1.3.1.9
r0761	enoyl-[ACP] reductase (NADH)	nadp[c] + c60acp[c] <=> h[c] + nadph[c] + c6dacp[c]	(ATEG_06490) or (ATEG_01213) or (ATEG_04419) or (ATEG_05412) or (ATEG_08264) or (ATEG_04258)	LM:Fatty acid biosynthesis	1.3.1.9
r0762	enoyl-[ACP] reductase (NADH)	nadp[c] + c80acp[c] <=> h[c] + nadph[c] + c8dacp[c]	(ATEG_06490) or (ATEG_01213) or (ATEG_04419) or (ATEG_05412) or (ATEG_08264) or (ATEG_04258)	LM:Fatty acid biosynthesis	1.3.1.9
r0763	enoyl-[ACP] reductase (NADH)	nadp[c] + c100acp[c] <=> h[c] + nadph[c] + c10dacp[c]	(ATEG_06490) or (ATEG_01213) or (ATEG_04419) or (ATEG_05412) or (ATEG_08264) or (ATEG_04258)	LM:Fatty acid biosynthesis	1.3.1.9
r0764	enoyl-[ACP] reductase (NADH)	nadp[c] + c120acp[c] <=> h[c] + nadph[c] + c12dacp[c]	(ATEG_06490) or (ATEG_01213) or (ATEG_04419) or (ATEG_05412) or (ATEG_08264) or (ATEG_04258)	LM:Fatty acid biosynthesis	1.3.1.9
r0765	enoyl-[ACP] reductase (NADH)	h[c] + nadph[c] + c14dacp[c] <=> nadp[c] + c140acp[c]	(ATEG_06490) or (ATEG_01213) or (ATEG_04419) or (ATEG_05412) or (ATEG_08264) or (ATEG_04258)	LM:Fatty acid biosynthesis	1.3.1.9
r0766	enoyl-[ACP] reductase (NADH)	nadp[c] + c160acp[c] <=> h[c] + nadph[c] + c16dacp[c]	(ATEG_06490) or (ATEG_01213) or (ATEG_04419) or (ATEG_05412) or (ATEG_08264) or (ATEG_04258) or (ATEG_10022)	LM:Fatty acid biosynthesis	1.3.1.9
r0767	enoyl-[ACP] reductase (NADH)	nadp[c] + c180acp[c] <=> h[c] + nadph[c] + c18dacp[c]	(ATEG_06490) or (ATEG_01213) or (ATEG_04419) or (ATEG_05412) or (ATEG_08264) or (ATEG_04258)	LM:Fatty acid biosynthesis	1.3.1.9
r0768	3-oxoacyl-[ACP] reductase	h[c] + nadph[c] + aacacp[c] <=> nadp[c] + c4hacp[c]	(ATEG_01141) or (ATEG_04317) or (ATEG_00170) or (ATEG_08633) or (ATEG_02020) or (ATEG_10354)	LM:Fatty acid biosynthesis	1.1.1.100
r0769	[ACP] S-malonyltransferase	h[c] + malcoa[c] + acp[c] <=> coa[c] + malacp[c]	(ATEG_06835) or (ATEG_04258)	LM:Fatty acid biosynthesis	2.3.1.39
r0770	beta-ketoacyl-ACP synthase I	malacp[c] + acacp[c] -> co2[c] + acp[c] + aacacp[c]	(ATEG_06765) or (ATEG_06598)	LM:Fatty acid biosynthesis	2.3.1.41
r0771	beta-ketoacyl-ACP synthase I	c40acp[c] + malacp[c] -> co2[c] + acp[c] + c6oacp[c]	(ATEG_06765) or (ATEG_06598)	LM:Fatty acid biosynthesis	2.3.1.41
r0772	beta-ketoacyl-ACP synthase I	malacp[c] + c60acp[c] -> co2[c] + acp[c] + c8oacp[c]	(ATEG_06765) or (ATEG_06598)	LM:Fatty acid biosynthesis	2.3.1.41
r0773	beta-ketoacyl-ACP synthase I	malacp[c] + c80acp[c] -> co2[c] + acp[c] + c10oacp[c]	(ATEG_06765) or (ATEG_06598)	LM:Fatty acid biosynthesis	2.3.1.41
r0774	beta-ketoacyl-ACP synthase I	malacp[c] + c100acp[c] -> co2[c] + acp[c] + c12oacp[c]	(ATEG_06765) or (ATEG_06598)	LM:Fatty acid biosynthesis	2.3.1.41
r0775	beta-ketoacyl-ACP synthase I	malacp[c] + c120acp[c] -> co2[c] + acp[c] + c14oacp[c]	(ATEG_06765) or (ATEG_06598)	LM:Fatty acid biosynthesis	2.3.1.41
r0776	beta-ketoacyl-ACP synthase I	malacp[c] + c140acp[c] -> co2[c] + acp[c] + c16oacp[c]	(ATEG_06765) or (ATEG_06598)	LM:Fatty acid biosynthesis	2.3.1.41
r0777	beta-ketoacyl-ACP synthase I	malacp[c] + c160acp[c] -> co2[c] + acp[c] + c18oacp[c]	(ATEG_06765) or (ATEG_06598)	LM:Fatty acid biosynthesis	2.3.1.41
r0778	Fatty-acid synthase	2 h[c] + 2 nadph[c] + malacp[c] + c120acp[c] -> h2o[c] + co2[c] + 2 nadp[c] + acp[c] + c140acp[c]	(ATEG_08668) or (ATEG_04259) or (ATEG_08172) or (ATEG_01894) or (ATEG_00913)	LM:Fatty acid biosynthesis	2.3.1.85
r0779	Fatty-acid synthase	2 h[c] + 2 nadph[c] + malacp[c] + c140acp[c] -> h2o[c] + co2[c] + 2 nadp[c] + acp[c] + c160acp[c]	(ATEG_08668) or (ATEG_04259) or (ATEG_08172) or (ATEG_01894) or (ATEG_00913)	LM:Fatty acid biosynthesis	2.3.1.85
r0780	Fatty-acid synthase	2 h[c] + 2 nadph[c] + malacp[c] + c160acp[c] -> h2o[c] + co2[c] + 2 nadp[c] + acp[c] + c180acp[c]	(ATEG_08668) or (ATEG_04259) or (ATEG_08172) or (ATEG_01894) or (ATEG_00913)	LM:Fatty acid biosynthesis	2.3.1.85
r0781	Fatty-acid synthase	c4hacp[c] <=> h2o[c] + c4dacp[c]	(ATEG_08668) or (ATEG_04259) or (ATEG_08172) or (ATEG_01894) or (ATEG_00913) or (ATEG_04258)	LM:Fatty acid biosynthesis	2.3.1.85 4.2.1.58
r0782	Fatty-acid synthase	c6hacp[c] <=> h2o[c] + c6dacp[c]	(ATEG_08668) or (ATEG_04259) or (ATEG_08172) or (ATEG_01894) or (ATEG_00913) or (ATEG_04258)	LM:Fatty acid biosynthesis	2.3.1.85 4.2.1.58
r0783	Fatty-acid synthase	c8hacp[c] <=> h2o[c] + c8dacp[c]	(ATEG_08668) or (ATEG_04259) or (ATEG_08172) or (ATEG_01894) or (ATEG_00913) or (ATEG_04258)	LM:Fatty acid biosynthesis	2.3.1.85 4.2.1.58
r0784	Fatty-acid synthase	c10hacp[c] <=> h2o[c] + c10dacp[c]	(ATEG_08668) or (ATEG_04259) or (ATEG_08172) or (ATEG_01894) or (ATEG_00913) or (ATEG_04258)	LM:Fatty acid biosynthesis	2.3.1.85 4.2.1.58
r0785	Fatty-acid synthase	c12hacp[c] <=> h2o[c] + c12dacp[c]	(ATEG_08668) or (ATEG_04259) or (ATEG_08172) or (ATEG_01894) or (ATEG_00913) or (ATEG_04258)	LM:Fatty acid biosynthesis	2.3.1.85 4.2.1.58
r0786	3-oxoacyl-[ACP] reductase	h[c] + nadph[c] + c6oacp[c] <=> nadp[c] + c6hacp[c]	(ATEG_01052 and ATEG_07700 and ATEG_09010) or (ATEG_01141) or (ATEG_04317) or (ATEG_00170) or (ATEG_08633) or (ATEG_02020) or (ATEG_10354)	LM:Fatty acid biosynthesis	1.1.1.100
r0787	Fatty-acid synthase	2 h[c] + 2 nadph[c] + malacp[c] + c80acp[c] -> h2o[c] + co2[c] + 2 nadp[c] + acp[c] + c100acp[c]	(ATEG_08668) or (ATEG_04259) or (ATEG_08172) or (ATEG_01894) or (ATEG_00913)	LM:Fatty acid biosynthesis	2.3.1.85
r0788	Fatty-acid synthase	2 h[c] + 2 nadph[c] + malacp[c] + c100acp[c] -> h2o[c] + co2[c] + 2 nadp[c] + acp[c] + c120acp[c]	(ATEG_08668) or (ATEG_04259) or (ATEG_08172) or (ATEG_01894) or (ATEG_00913)	LM:Fatty acid biosynthesis	2.3.1.85
r0789	Fatty-acid synthase	2 h[c] + 2 nadph[c] + malacp[c] + c60acp[c] -> h2o[c] + co2[c] + 2 nadp[c] + acp[c] + c80acp[c]	(ATEG_08668) or (ATEG_04259) or (ATEG_08172) or (ATEG_01894) or (ATEG_00913)	LM:Fatty acid biosynthesis	2.3.1.85
r0790	[ACP] S-acetyltransferase	ppacoa[c] + acp[c] <=> coa[c] + ppiacp[c]	(ATEG_08667) or (ATEG_08668) or (ATEG_04258)	LM:Fatty acid biosynthesis	2.3.1.38
r0791	stearoyl-CoA 9-desaturase	o2[c] + h[c] + nadph[c] + c180acp[c] -> 2 h2o[c] + nadp[c] + c181acp[c]	(ATEG_06342) or (ATEG_09212)	LM:Fatty acid biosynthesis	1.14.19.1
r0792	C160-CoA 9-desaturase	o2[c] + h[c] + nadph[c] + c160acp[c] -> 2 h2o[c] + nadp[c] + c161acp[c]	(ATEG_06342) or (ATEG_09212)	LM:Fatty acid biosynthesis	1.14.19.1
r0793	C140-CoA 9-desaturase	o2[c] + h[c] + nadph[c] + c140acp[c] -> 2 h2o[c] + nadp[c] + c141acp[c]	(ATEG_06342) or (ATEG_09212)	LM:Fatty acid biosynthesis	1.14.19.1
r0794	linoleoyl-CoA desaturase	o2[c] + h[c] + nadph[c] + c181acp[c] -> 2 h2o[c] + nadp[c] + c182acp[c]	(ATEG_05703) or (ATEG_00444) or (ATEG_09211)	LM:Fatty acid biosynthesis	1.14.19.3
r0795	linoleoyl-CoA dsaturase	o2[c] + h[c] + nadph[c] + c161acp[c] <=> 2 h2o[c] + nadp[c] + c162acp[c]	(ATEG_05703) or (ATEG_00444) or (ATEG_09211)	LM:Fatty acid biosynthesis	1.14.19.3
r0796	[ACP] S-acetyltransferase	acp[c] + c40coa[c] <=> coa[c] + c40acp[c]	(ATEG_08667) or (ATEG_08668) or (ATEG_04258)	LM:Fatty acid biosynthesis	2.3.1.38
r0797	[ACP] S-acetyltransferase	acp[c] + c60coa[c] <=> coa[c] + c60acp[c]	(ATEG_08667) or (ATEG_08668) or (ATEG_04258)	LM:Fatty acid biosynthesis	2.3.1.38
r0798	[ACP] S-acetyltransferase	acp[c] + c80coa[c] <=> coa[c] + c80acp[c]	(ATEG_08667) or (ATEG_08668) or (ATEG_04258)	LM:Fatty acid biosynthesis	2.3.1.38
r0799	[ACP] S-acetyltransferase	acp[c] + c100coa[c] <=> coa[c] + c100acp[c]	(ATEG_08667) or (ATEG_08668) or (ATEG_04258)	LM:Fatty acid biosynthesis	2.3.1.38
r0800	[ACP] S-acetyltransferase	acp[c] + c120coa[c] <=> coa[c] + c120acp[c]	(ATEG_08667) or (ATEG_08668) or (ATEG_04258)	LM:Fatty acid biosynthesis	2.3.1.38
r0801	[ACP] S-acetyltransferase	acp[c] + c140coa[c] <=> coa[c] + c140acp[c]	(ATEG_08667) or (ATEG_08668) or (ATEG_04258)	LM:Fatty acid biosynthesis	2.3.1.38
r0802	[ACP] S-acetyltransferase	acp[c] + c141coa[c] <=> coa[c] + c141acp[c]	(ATEG_08667) or (ATEG_08668) or (ATEG_04258)	LM:Fatty acid biosynthesis	2.3.1.38
r0803	[ACP] S-acetyltransferase	acp[c] + c160coa[c] <=> coa[c] + c160acp[c]	(ATEG_08667) or (ATEG_08668) or (ATEG_04258)	LM:Fatty acid biosynthesis	2.3.1.38
r0804	[ACP] S-acetyltransferase	acp[c] + c161coa[c] <=> coa[c] + c161acp[c]	(ATEG_08667) or (ATEG_08668) or (ATEG_04258)	LM:Fatty acid biosynthesis	2.3.1.38
r0805	[ACP] S-acetyltransferase	acp[c] + c162coa[c] <=> coa[c] + c162acp[c]	(ATEG_08667) or (ATEG_08668) or (ATEG_04258)	LM:Fatty acid biosynthesis	2.3.1.38
r0806	[ACP] S-acetyltransferase	acp[c] + c180coa[c] <=> coa[c] + c180acp[c]	(ATEG_08667) or (ATEG_08668) or (ATEG_04258)	LM:Fatty acid biosynthesis	2.3.1.38
r0807	[ACP] S-acetyltransferase	acp[c] + c181coa[c] <=> coa[c] + c181acp[c]	(ATEG_08667) or (ATEG_08668) or (ATEG_04258)	LM:Fatty acid biosynthesis	2.3.1.38
r0808	[ACP] S-acetyltransferase	acp[c] + c182coa[c] <=> coa[c] + c182acp[c]	(ATEG_08667) or (ATEG_08668) or (ATEG_04258)	LM:Fatty acid biosynthesis	2.3.1.38
r0809	[ACP] S-acetyltransferase	acp[c] + c183coa[c] <=> coa[c] + c183acp[c]	(ATEG_08667) or (ATEG_08668) or (ATEG_04258)	LM:Fatty acid biosynthesis	2.3.1.38
r0810	[ACP] S-acetyltransferase	accoa[c] + acp[c] -> coa[c] + acacp[c]	(ATEG_08667) or (ATEG_08668) or (ATEG_04258)	LM:Fatty acid biosynthesis;	2.3.1.38
r0811	trans-2-enoyl-CoA reductase	h[m] + nadph[m] + acyldcoa[m] -> nadp[m] + acylcoa[m]	(ATEG_04264)	LM:Fatty acid elongation	1.3.1.38
r0812	trans-2-enoyl-CoA reductase	h[m] + nadph[m] + c16dcoa[m] -> nadp[m] + c160coa[m]	(ATEG_04264)	LM:Fatty acid elongation	1.3.1.38
r0813	trans-2-enoyl-CoA reductase	h[m] + nadph[m] + c8dcoa[m] -> nadp[m] + c80coa[m]	(ATEG_04264)	LM:Fatty acid elongation	1.3.1.38
r0814	trans-2-enoyl-CoA reductase	h[m] + nadph[m] + c12dcoa[m] -> nadp[m] + c120coa[m]	(ATEG_04264)	LM:Fatty acid elongation	1.3.1.38
r0815	trans-2-enoyl-CoA reductase	h[m] + nadph[m] + c14dcoa[m] -> nadp[m] + c140coa[m]	(ATEG_04264)	LM:Fatty acid elongation	1.3.1.38
r0816	trans-2-enoyl-CoA reductase	h[m] + nadph[m] + c10dcoa[m] -> nadp[m] + c100coa[m]	(ATEG_04264)	LM:Fatty acid elongation	1.3.1.38
r0817	trans-2-enoyl-CoA reductase	h[m] + nadph[m] + c6dcoa[m] -> nadp[m] + c60coa[m]	(ATEG_04264)	LM:Fatty acid elongation	1.3.1.38
r0818	trans-2-enoyl-CoA reductase	h[m] + nadph[m] + c18dcoa[m] -> nadp[m] + c180coa[m]	(ATEG_04264)	LM:Fatty acid elongation	1.3.1.38
r0819	Palmitoyl-CoA hydrolase	h2o[c] + c160coa[c] -> h[c] + coa[c] + c160[c]	(ATEG_00835)	LM:Fatty acid elongation	3.1.2.2
r0820	Palmitoyl-CoA hydrolase	h2o[c] + c180coa[c] -> h[c] + coa[c] + c180[c]	(ATEG_00835)	LM:Fatty acid elongation	3.1.2.2
r0821	Palmitoyl-CoA hydrolase	h2o[c] + c181coa[c] -> h[c] + coa[c] + c181[c]	(ATEG_00835)	LM:Fatty acid elongation	3.1.2.2
r0822	Palmitoyl-CoA hydrolase	h2o[c] + c182coa[c] -> h[c] + coa[c] + c182[c]	(ATEG_00835)	LM:Fatty acid elongation	3.1.2.2
r0823	NAD-dependent alcohol dehydrogenase	nad[c] + gl[c] -> h[c] + nadh[c] + glyal[c]	(ATEG_09407) or (ATEG_04319)	LM:Fatty acid metabolism	1.1.1.1
r0824	NADP-dependent alcohol dehydrogenase	nadp[c] + gl[c] -> h[c] + nadph[c] + glyal[c]	(ATEG_07900) or (ATEG_01574) or (ATEG_04734) or (ATEG_01826)	LM:Fatty acid metabolism	1.1.1.2
r0825	Glutaryl-CoA dehydrogenase	2 h[m] + fad[m] + gltcoa[m] -> fadh2[m] + co2[m] + cronylcoa[m]	(ATEG_08866)	LM:Fatty acid metabolism	1.3.99.7
r0826	NADPH--cytochrome P450 reductase	nadph[c] + 2 feri[m] -> h[m] + nadp[c] + 2 fero[m]	(ATEG_00729) or (ATEG_05064)	LM:Fatty acid metabolism	1.6.2.4
r0827	Acyl-CoA dehydrogenase	h[m] + fad[m] + c60coa[m] -> fadh2[m] + c6dcoa[m]	(ATEG_09377) or (ATEG_09379)	LM:Fatty acid metabolism	1.3.99.3
r0828	Acyl-CoA dehydrogenase	h[m] + fad[m] + c40coa[m] -> fadh2[m] + c4dcoa[m]	(ATEG_09377) or (ATEG_09379)	LM:Fatty acid metabolism	1.3.99.3
r0829	acetyl-CoA C-acyltransferase	coa[m] + c18ocoa[m] -> accoa[m] + c160coa[m]	(ATEG_00456) or (ATEG_01444) or (ATEG_03795) or (ATEG_03980) or (ATEG_04288)	LM:Fatty acid metabolism	2.3.1.16
r0830	acetyl-CoA C-acyltransferase	coa[m] + c16ocoa[m] -> accoa[m] + c140coa[m]	(ATEG_00456) or (ATEG_01444) or (ATEG_03795) or (ATEG_03980) or (ATEG_04288)	LM:Fatty acid metabolism	2.3.1.16
r0831	acetyl-CoA C-acyltransferase	coa[m] + c14ocoa[m] -> accoa[m] + c120coa[m]	(ATEG_00456) or (ATEG_01444) or (ATEG_03795) or (ATEG_03980) or (ATEG_04288)	LM:Fatty acid metabolism	2.3.1.16
r0832	acetyl-CoA C-acyltransferase	coa[m] + c12ocoa[m] -> accoa[m] + c100coa[m]	(ATEG_00456) or (ATEG_01444) or (ATEG_03795) or (ATEG_03980) or (ATEG_04288)	LM:Fatty acid metabolism	2.3.1.16
r0833	acetyl-CoA C-acyltransferase	coa[m] + c10ocoa[m] -> accoa[m] + c80coa[m]	(ATEG_00456) or (ATEG_01444) or (ATEG_03795) or (ATEG_03980) or (ATEG_04288)	LM:Fatty acid metabolism	2.3.1.16
r0834	acetyl-CoA C-acyltransferase	coa[m] + c8ocoa[m] -> accoa[m] + c60coa[m]	(ATEG_00456) or (ATEG_01444) or (ATEG_03795) or (ATEG_03980) or (ATEG_04288)	LM:Fatty acid metabolism	2.3.1.16
r0835	acetyl-CoA C-acyltransferase	coa[m] + c6ocoa[m] -> accoa[m] + c40coa[m]	(ATEG_00456) or (ATEG_01444) or (ATEG_03795) or (ATEG_03980) or (ATEG_04288)	LM:Fatty acid metabolism	2.3.1.16
r0836	3-hydroxyacyl-CoA dehydrogenase	nad[m] + c18hcoa[m] <=> h[m] + nadh[m] + c18ocoa[m]	(ATEG_02221) or (ATEG_01833) or (ATEG_06720) or (ATEG_10262 and ATEG_01140 and ATEG_01833) or (ATEG_10262 and ATEG_00943) or (ATEG_01423)	LM:Fatty acid metabolism	1.1.1.35
r0837	3-hydroxyacyl-CoA dehydrogenase	nad[m] + c16hcoa[m] <=> h[m] + nadh[m] + c16ocoa[m]	(ATEG_02221) or (ATEG_01833) or (ATEG_06720) or (ATEG_10262 and ATEG_01140 and ATEG_01833) or (ATEG_10262 and ATEG_00943) or (ATEG_01423)	LM:Fatty acid metabolism	1.1.1.35
r0838	3-hydroxyacyl-CoA dehydrogenase	nad[m] + c14hcoa[m] <=> h[m] + nadh[m] + c14ocoa[m]	(ATEG_02221) or (ATEG_01833) or (ATEG_06720) or (ATEG_10262 and ATEG_01140 and ATEG_01833) or (ATEG_10262 and ATEG_00943) or (ATEG_01423)	LM:Fatty acid metabolism	1.1.1.35
r0839	3-hydroxyacyl-CoA dehydrogenase	nad[m] + c12hcoa[m] <=> h[m] + nadh[m] + c12ocoa[m]	(ATEG_02221) or (ATEG_01833) or (ATEG_06720) or (ATEG_10262 and ATEG_01140 and ATEG_01833) or (ATEG_10262 and ATEG_00943) or (ATEG_01423)	LM:Fatty acid metabolism	1.1.1.35
r0840	3-hydroxyacyl-CoA dehydrogenase	nad[m] + c10hcoa[m] <=> h[m] + nadh[m] + c10ocoa[m]	(ATEG_02221) or (ATEG_01833) or (ATEG_06720) or (ATEG_10262 and ATEG_01140 and ATEG_01833) or (ATEG_10262 and ATEG_00943) or (ATEG_01423)	LM:Fatty acid metabolism	1.1.1.35
r0841	3-hydroxyacyl-CoA dehydrogenase	nad[m] + c8hcoa[m] <=> h[m] + nadh[m] + c8ocoa[m]	(ATEG_02221) or (ATEG_01833) or (ATEG_06720) or (ATEG_10262 and ATEG_01140 and ATEG_01833) or (ATEG_10262 and ATEG_00943) or (ATEG_01423)	LM:Fatty acid metabolism	1.1.1.35
r0842	3-hydroxyacyl-CoA dehydrogenase	nad[m] + c6hcoa[m] <=> h[m] + nadh[m] + c6ocoa[m]	(ATEG_02221) or (ATEG_01833) or (ATEG_06720) or (ATEG_10262 and ATEG_01140 and ATEG_01833) or (ATEG_10262 and ATEG_00943) or (ATEG_01423)	LM:Fatty acid metabolism	1.1.1.35
r0843	3-hydroxyacyl-CoA dehydrogenase	nad[m] + c4hcoa[m] <=> h[m] + nadh[m] + aaccoa[m]	(ATEG_02221) or (ATEG_01833) or (ATEG_06720) or (ATEG_10262 and ATEG_01140 and ATEG_01833) or (ATEG_10262 and ATEG_00943) or (ATEG_01423)	LM:Fatty acid metabolism	1.1.1.35
r0844	Enoyl-CoA hydratase	c18hcoa[m] <=> h2o[m] + c18dcoa[m]	(ATEG_02221) or (ATEG_04684) or (ATEG_01509) or (ATEG_04903)	LM:Fatty acid metabolism	4.2.1.17
r0845	Enoyl-CoA hydratase	c16hcoa[m] <=> h2o[m] + c16dcoa[m]	(ATEG_02221) or (ATEG_04684) or (ATEG_01509) or (ATEG_04903)	LM:Fatty acid metabolism	4.2.1.17
r0846	Enoyl-CoA hydratase	c14hcoa[m] <=> h2o[m] + c14dcoa[m]	(ATEG_02221) or (ATEG_04684) or (ATEG_01509) or (ATEG_04903)	LM:Fatty acid metabolism	4.2.1.17
r0847	Enoyl-CoA hydratase	c12hcoa[m] <=> h2o[m] + c12dcoa[m]	(ATEG_02221) or (ATEG_04684) or (ATEG_01509) or (ATEG_04903)	LM:Fatty acid metabolism	4.2.1.17
r0848	Enoyl-CoA hydratase	c10hcoa[m] <=> h2o[m] + c10dcoa[m]	(ATEG_02221) or (ATEG_04684) or (ATEG_01509) or (ATEG_04903)	LM:Fatty acid metabolism	4.2.1.17
r0849	Enoyl-CoA hydratase	c8hcoa[m] <=> h2o[m] + c8dcoa[m]	(ATEG_02221) or (ATEG_04684) or (ATEG_01509) or (ATEG_04903)	LM:Fatty acid metabolism	4.2.1.17
r0850	Enoyl-CoA hydratase	c6hcoa[m] <=> h2o[m] + c6dcoa[m]	(ATEG_02221) or (ATEG_04684) or (ATEG_01509) or (ATEG_04903)	LM:Fatty acid metabolism	4.2.1.17
r0851	Enoyl-CoA hydratase	c4hcoa[m] <=> h2o[m] + c4dcoa[m]	(ATEG_02221) or (ATEG_04684) or (ATEG_01509) or (ATEG_04903)	LM:Fatty acid metabolism	4.2.1.17
r0852	Long-chain acyl-CoA synthetase	atp[c] + coa[c] + c181[c] -> h[c] + amp[c] + ppi[c] + c181coa[c]	(ATEG_05074) or (ATEG_05763) or (ATEG_10296) or (ATEG_08943) or (ATEG_04975) or (ATEG_07985) or (ATEG_04429)	LM:Fatty acid metabolism	6.2.1.3
r0853	Long-chain acyl-CoA synthetase	atp[c] + coa[c] + c182[c] -> h[c] + amp[c] + ppi[c] + c182coa[c]	(ATEG_05074) or (ATEG_05763) or (ATEG_10296) or (ATEG_08943) or (ATEG_04975) or (ATEG_07985) or (ATEG_04429)	LM:Fatty acid metabolism	6.2.1.3
r0854	Long-chain acyl-CoA synthetase	atp[c] + coa[c] + c183[c] -> h[c] + amp[c] + ppi[c] + c183coa[c]	(ATEG_05074) or (ATEG_05763) or (ATEG_10296) or (ATEG_08943) or (ATEG_04975) or (ATEG_07985) or (ATEG_04429)	LM:Fatty acid metabolism	6.2.1.3
r0855	Long-chain acyl-CoA synthetase	atp[c] + coa[c] + c40[c] -> h[c] + amp[c] + ppi[c] + c40coa[c]	(ATEG_03028) or (ATEG_05074) or (ATEG_05763) or (ATEG_10296) or (ATEG_08943) or (ATEG_04975) or (ATEG_07985) or (ATEG_04429)	LM:Fatty acid metabolism	6.2.1.3
r0856	Long-chain acyl-CoA synthetase	atp[c] + coa[c] + c60[c] -> h[c] + amp[c] + ppi[c] + c60coa[c]	(ATEG_03028) or (ATEG_05074) or (ATEG_05763) or (ATEG_10296) or (ATEG_08943) or (ATEG_04975) or (ATEG_07985) or (ATEG_04429)	LM:Fatty acid metabolism	6.2.1.3
r0857	Long-chain acyl-CoA synthetase	atp[c] + coa[c] + c80[c] -> h[c] + amp[c] + ppi[c] + c80coa[c]	(ATEG_03028) or (ATEG_05074) or (ATEG_05763) or (ATEG_10296) or (ATEG_08943) or (ATEG_04975) or (ATEG_07985) or (ATEG_04429)	LM:Fatty acid metabolism	6.2.1.3
r0858	Long-chain acyl-CoA synthetase	atp[c] + coa[c] + c100[c] -> h[c] + amp[c] + ppi[c] + c100coa[c]	(ATEG_03028) or (ATEG_05074) or (ATEG_05763) or (ATEG_10296) or (ATEG_08943) or (ATEG_04975) or (ATEG_07985) or (ATEG_04429)	LM:Fatty acid metabolism	6.2.1.3
r0859	Long-chain acyl-CoA synthetase	atp[c] + coa[c] + c120[c] -> h[c] + amp[c] + ppi[c] + c120coa[c]	(ATEG_03028) or (ATEG_05074) or (ATEG_05763) or (ATEG_10296) or (ATEG_08943) or (ATEG_04975) or (ATEG_07985) or (ATEG_04429)	LM:Fatty acid metabolism	6.2.1.3
r0860	Long-chain acyl-CoA synthetase	atp[c] + coa[c] + c140[c] -> h[c] + amp[c] + ppi[c] + c140coa[c]	(ATEG_03028) or (ATEG_05074) or (ATEG_05763) or (ATEG_10296) or (ATEG_08943) or (ATEG_04975) or (ATEG_07985) or (ATEG_04429)	LM:Fatty acid metabolism	6.2.1.3
r0861	Long-chain acyl-CoA synthetase	atp[c] + coa[c] + c141[c] -> h[c] + amp[c] + ppi[c] + c141coa[c]	(ATEG_03028) or (ATEG_08943) or (ATEG_04975) or (ATEG_07985) or (ATEG_04429)	LM:Fatty acid metabolism	6.2.1.3
r0862	Long-chain acyl-CoA synthetase	atp[c] + coa[c] + c160[c] -> h[c] + amp[c] + ppi[c] + c160coa[c]	(ATEG_05074) or (ATEG_05763) or (ATEG_10296) or (ATEG_08943) or (ATEG_04975) or (ATEG_07985) or (ATEG_04429)	LM:Fatty acid metabolism	6.2.1.3
r0863	Long-chain acyl-CoA synthetase	atp[c] + coa[c] + c161[c] -> h[c] + amp[c] + ppi[c] + c161coa[c]	(ATEG_07985) or (ATEG_05074) or (ATEG_05763) or (ATEG_10296) or (ATEG_08943) or (ATEG_04975) or (ATEG_07985) or (ATEG_04429)	LM:Fatty acid metabolism	6.2.1.3
r0864	Long-chain acyl-CoA synthetase	atp[c] + coa[c] + c162[c] -> h[c] + amp[c] + ppi[c] + c162coa[c]	(ATEG_07985) or (ATEG_04429) or (ATEG_05074) or (ATEG_05763) or (ATEG_10296)	LM:Fatty acid metabolism	6.2.1.3
r0865	Long-chain acyl-CoA synthetase	atp[c] + coa[c] + c180[c] -> h[c] + amp[c] + ppi[c] + c180coa[c]	(ATEG_05074) or (ATEG_05763) or (ATEG_10296) or (ATEG_08943) or (ATEG_04975) or (ATEG_07985) or (ATEG_04429)	LM:Fatty acid metabolism	6.2.1.3
r0866	Long-chain acyl-CoA synthetase	atp[c] + coa[c] + c181[c] -> h[c] + amp[c] + ppi[c] + c181coa[c]	(ATEG_08943) or (ATEG_04975) or (ATEG_07985) or (ATEG_04429)	LM:Fatty acid metabolism	6.2.1.3
r0867	Long-chain acyl-CoA synthetase	atp[c] + coa[c] + c182[c] -> h[c] + amp[c] + ppi[c] + c182coa[c]	(ATEG_08943) or (ATEG_04975) or (ATEG_07985) or (ATEG_04429)	LM:Fatty acid metabolism	6.2.1.3
r0868	Long-chain acyl-CoA synthetase	atp[c] + coa[c] + c183[c] -> h[c] + amp[c] + ppi[c] + c183coa[c]	(ATEG_08943) or (ATEG_04975) or (ATEG_07985) or (ATEG_04429)	LM:Fatty acid metabolism	6.2.1.3
r0869	delta24-sterol reductase	nadp[c] + chtrol[c] <=> h[c] + nadph[c] + destol[c]	(ATEG_07520)	LM:Steroid biosynthesis	1.3.1.72
r0870	delta24-sterol reductase	h[c] + nadph[c] + dhdestol[c] <=> nadp[c] + pvd3[c]	(ATEG_07520)	LM:Steroid biosynthesis	1.3.1.72
r0871	1,2-Diacyl-sn-glycerol:sterol O-acyltransferase	magly[c] + chlestr[c] -> dagly[c] + chtrol[c]	(ATEG_05353)	LM:Steroid biosynthesis	3.1.1.3
r0872	cytochrome P450, family 51 (sterol 14-demethylase)	3 o2[c] + 2 h[c] + 3 nadph[c] + lnst[c] -> 4 h2o[c] + 3 nadp[c] + for[c] + dctol[c]	(ATEG_02850) or (ATEG_05917) or (ATEG_10302)	LM:Steroid biosynthesis	1.14.13.70
r0873	delta14-sterol reductase;C-14 sterol reductase (ERG24)	h[c] + nadph[c] + dctol[c] -> nadp[c] + dcdol[c]	(ATEG_03054) or (ATEG_03394) or (ATEG_09117)	LM:Steroid biosynthesis	1.3.1.70
r0874	methylsterol monooxygenase;C-4 sterol methyl oxidase (ERG25)	3 o2[c] + 2 h[c] + 3 nadph[c] + dcdol[c] -> 4 h2o[c] + 3 nadp[c] + dcda[c]	(ATEG_02775) or (ATEG_04816) or (ATEG_08148)	LM:Steroid biosynthesis	1.14.13.72	KEGG
r0875	C-4 sterol decarboxylase (ERG26);sterol-4alpha-carboxylate 3-dehydrogenase (decarboxylating)	nadp[c] + dcda[c] -> co2[c] + nadph[c] + cdol[c]	(ATEG_07856) or (ATEG_03696)	LM:Steroid biosynthesis	1.1.1.170	KEGG
r0876	C-4 methylsterol oxidase	3 o2[c] + 4 h[c] + 3 nadph[c] + cdol[c] -> 4 h2o[c] + 3 nadp[c] + cda[c]	(ATEG_02775) or (ATEG_04816)	LM:Steroid biosynthesis	1.14.13.72
r0877	C-4 sterol decarboxylase (ERG26)	h[c] + cda[c] -> co2[c] + zymst[c]	(ATEG_07856)	LM:Steroid biosynthesis
r0878	C-8 sterol isomerase (ERG1)	epst[c] <=> fest[c]	(ATEG_03756)	LM:Steroid biosynthesis
r0879	C-5 sterol desaturase (ERG3)	nadph[c] + epst[c] -> 3 h[c] + nadp[c] + ergod[c]	(ATEG_05201) or (ATEG_05661)	LM:Steroid biosynthesis
r0880	C-22 sterol desaturase (ERG5)	nadp[c] + ergod[c] -> h[c] + nadph[c] + egteol[c]	(ATEG_00175) or (ATEG_01083) or (ATEG_03815)	LM:Steroid biosynthesis
r0881	delta24(24(1))-sterol reductase	h[c] + nadph[c] + egteol[c] -> nadp[c] + egstr[c]	(ATEG_02645) or (ATEG_06088)	LM:Steroid biosynthesis	1.3.1.71
r0882	7-dehydrocholesterol reductase	h[c] + nadph[c] + pvd3[c] -> nadp[c] + chtrol[c]	(ATEG_10062)	LM:Steroid biosynthesis	1.3.1.21
r0883	sterol 24-C-methyltransferase	sam[c] + zymst[c] -> h[c] + sah[c] + fest[c]	(ATEG_05278) or (ATEG_02172)	LM:Steroid biosynthesis	2.1.1.41
r0884	3-keto-steroid reductase	h[c] + nadph[c] + cdol[c] -> nadp[c] + mzymst[c]	(ATEG_03932)	LM:Steroid biosynthesis	1.1.1.270
r0885	Diacylglycerol - sterol O-acyltransferase	acylcoa[c] + chtrol[c] <=> coa[c] + chlestr[c]	(ATEG_03023)	LM:Steroid biosynthesis	2.3.1.26
r0886	Diacylglycerol - sterol O-acyltransferase	dagly[c] + egstr[c] -> magly[c] + ergose[c]	(ATEG_03023)	LM:Steroid biosynthesis	2.3.1.73
r0887	Triglyceride lipase-cholesterol esterase	h2o[c] + ergose[c] -> 0.026 c180[c] + 0.374 c181[c] + 0.354 c182[c] + 0.032 c183[c] + 0.024 c120[c] + 0.154 c160[c] + 0.02 c161[c] + 0.013 c140[c] + 0.012 c141[c] + egstr[c]	(ATEG_05353)	LM:Steroid biosynthesis	3.1.1.13
r0888	Glycerone kinase	atp[c] + glyn[c] -> h[c] + adp[c] + t3p2[c]	(ATEG_01999) or (ATEG_03595)	LM;EM:Methane metabolism	2.7.1.29
r0889	ATP NGAM maintence	h2o[c] + atp[c] -> h[c] + pi[c] + adp[c]		Maintenance requirements (non-growth associated)
tr_ac	Acetate plasma membrane transport	ac[e] <=> ac[c]	(ATEG_03666) or (ATEG_10132)	MT	2.A.96.1.3
tr_accoa	acetyl-CoA transporter	accoa[m] <=> accoa[c]	(ATEG_01745)	MT
tr_aco	Cis-aconitate transporter	aco[m] <=> aco[c]	(ATEG_05896) or (ATEG_09970)	MT
tr_ad	Purine-cytosine permease	ad[e] <=> ad[c]	(ATEG_04414) or (ATEG_09149) or (ATEG_06344)	MT	2.A.1.40.1;2.A.39.2.4
tr_aglc	MFS monosaccharide transporter	adglc[e] -> adglc[c]	(ATEG_01768) or (ATEG_07802) or (ATEG_01032) or (ATEG_02489) or (ATEG_06095) or (ATEG_08609) or (ATEG_09103)	MT	2.A.1.1.33;39;58
tr_aka	Mitochondrial 2-oxodicarboxylate carrier	aka[m] -> aka[c]	(ATEG_04205)	MT	2.A.29.2.8
tr_akg	2-oxoglutarate transporter	akg[e] <=> akg[c]	(ATEG_05896) or (ATEG_04205)	MT
tr_akg	2-oxoglutarate transporter	akg[c] <=> akg[m]	(ATEG_05896) or (ATEG_04205)	MT	2.A.29.2.6
tr_akg	Mitochondrial 2-oxodicarboxylate carrier	akg[m] -> akg[c]	(ATEG_04205)	MT	2.A.29.2.8
tr_ala	Amino acid permease (Neutral aliphatic amino acid permease)	ala[e] <=> ala[c]	(ATEG_04310) or (ATEG_04783) or (ATEG_06506) or (ATEG_09028) or (ATEG_00961) or (ATEG_01221) or (ATEG_03484) or (ATEG_02308) or (ATEG_05599) or (ATEG_07524) or (ATEG_08419)	MT	2.A.3.10.14;19
tr_ama	L-2-aminoadipate transporter	ama[c] -> ama[m]		MT
tr_amp	Adenosine 5'-monophosphate transporter	amp[e] -> amp[c]	(ATEG_00521) or (ATEG_09129)	MT
tr_aobut	L-2-amino-3-oxobutanoate transporter	aobut[c] <=> aobut[m]		MT
tr_aol	D-arabinitol transporter	aol[e] <=> aol[c]		MT
tr_arab	D-arabinose transporter	arab[e] <=> arab[c]	(ATEG_07144) or (ATEG_01425) or (ATEG_02870) or (ATEG_03527) or (ATEG_08653)	MT	2.A.1.1.57;58
tr_arg	Amino acid permease	arg[e] <=> arg[c]	(ATEG_04310) or (ATEG_07986) or (ATEG_04783) or (ATEG_10389)	MT	2.A.29.9.1;2.A.3.10.14
tr_arg	L-arginine transporter	arg[c] <=> arg[m]	(ATEG_10389)	MT	2.A.29.9.1
tr_asn	Amino acid permease (Dicarboxylic amino acid permease)	asn[e] <=> asn[c]	(ATEG_04310) or (ATEG_04783) or (ATEG_06506) or (ATEG_09028) or (ATEG_09721) or (ATEG_01181) or (ATEG_02308) or (ATEG_05599) or (ATEG_07524) or (ATEG_08419)	MT	2.A.3.10.14;19
tr_asp	Amino acid permease (Dicarboxylic amino acid permease)	asp[e] <=> asp[c]	(ATEG_04310) or (ATEG_04783) or (ATEG_06506) or (ATEG_09028) or (ATEG_09721) or (ATEG_01181) or (ATEG_02308) or (ATEG_05599) or (ATEG_07524) or (ATEG_08419)	MT	2.A.3.10.14;
tr_asp	Amino acid permease (Dicarboxylic amino acid permease)	asp[m] <=> asp[c]	(ATEG_04310) or (ATEG_04783) or (ATEG_06506) or (ATEG_09028) or (ATEG_09721) or (ATEG_01181) or (ATEG_02308) or (ATEG_05599) or (ATEG_07524) or (ATEG_08419)	MT	2.A.3.10.14;
tr_banm	Benzoylamine transporter	bamn[c] <=> bamn[e]	(ATEG_02629) or (ATEG_07546)	MT	2.A.21.6.1;2
tr_bdfru	MFS monosaccharide transporter	bdfru[e] <=> bdfru[c]	(ATEG_07053) or (ATEG_01425) or (ATEG_02870) or (ATEG_03527) or (ATEG_08653) or (ATEG_01874) or (ATEG_03190) or (ATEG_04800) or (ATEG_07917) or (ATEG_07638) or (ATEG_07791) or (ATEG_07144)	MT
tr_bdglc	MFS monosaccharide transporter	bdglc[e] -> bdglc[c]	(ATEG_01768) or (ATEG_07802) or (ATEG_01032) or (ATEG_02489) or (ATEG_06095) or (ATEG_08609) or (ATEG_09103)	MT	2.A.1.1.33;39;51;58;68
tr_bglac	MFS monosaccharide transporter	bgal[e] -> bgal[c]	(ATEG_01425) or (ATEG_02870) or (ATEG_03527) or (ATEG_08653) or (ATEG_01874) or (ATEG_03190) or (ATEG_04800) or (ATEG_07917) or (ATEG_07638) or (ATEG_07053) or (ATEG_07144)	MT	2.A.1.1.33
tr_blaras	Beta-L-Arabinoside transporter	blaras[e] <=> blaras[c]	(ATEG_01874) or (ATEG_07917)	MT
tr_bn	Benzonitrile transporter	bn[e] <=> bn[c]		MT
tr_bt	Vitamin H:H symporter	h[e] + bt[e] <=> h[c] + bt[c]	(ATEG_03194)	MT	2.A.1.14.19
tr_c100coa	Decanoyl-CoA transporter	c100coa[c] <=> c100coa[m]		MT
tr_c120	laurate transporter	c120[e] <=> c120[c]	(ATEG_00957)	MT
tr_c120coa	Lauroyl-CoA transporter	c120coa[c] <=> c120coa[m]		MT
tr_c140	myristate transporter	c140[e] <=> c140[c]	(ATEG_00957)	MT
tr_c140coa	Myristoyl-CoA transporter	c140coa[c] <=> c140coa[m]		MT
tr_c160	palmitate transporter	c160[e] <=> c160[c]	(ATEG_00957)	MT
tr_c160coa	Palmitoyl-CoA transporter	c160coa[c] <=> c160coa[m]		MT
tr_c161	hexadecenoate transporter	c161[e] <=> c161[c]	(ATEG_00957)	MT
tr_c161coa	Hexadecenoyl-CoA transporter	c161coa[c] <=> c161coa[m]		MT
tr_c162coa	Hexadecadienoyl-CoA transporter	c162coa[c] <=> c162coa[m]		MT
tr_c180	stearate transporter	c180[e] <=> c180[c]	(ATEG_00957)	MT
tr_c180coa	Stearoyl-CoA transporter	c180coa[c] <=> c180coa[m]		MT
tr_c181	Oleic acid transporter	c181[e] <=> c181[c]	(ATEG_00957)	MT
tr_c181coa	Oleoyl-CoA transporter	c181coa[c] <=> c181coa[m]		MT
tr_c182	Linoleate transporter	c182[e] -> c182[c]	(ATEG_00957)	MT
tr_c182coa	Linoleoyl-CoA transporter	c182coa[c] <=> c182coa[m]		MT
tr_c183	Octadecatrienoic acid transporter	c183[e] <=> c183[c]	(ATEG_00957)	MT
tr_c183coa	Octadecatrienoyl-CoA transporter	c183coa[c] <=> c183coa[m]		MT
tr_c40coa	Butyryl-CoA transporter	c40coa[c] <=> c40coa[m]		MT
tr_c60	hexanoate transporter	c60[e] <=> c60[c]	(ATEG_00957)	MT
tr_c60coa	Hexanoyl-CoA transporter	c60coa[c] <=> c60coa[m]		MT
tr_c80	octanoate transporter	c80[e] <=> c80[c]	(ATEG_00957)	MT
tr_c80coa	Octanoyl-CoA transporter	c80coa[c] <=> c80coa[m]		MT
tr_ca	Calcium transporter	ca[e] <=> ca[c]		MT
tr_car	Mitochondrial carnitine/acylcarnitine carrier protein	car[c] <=> car[m]	(ATEG_00922)	MT	2.A.29.8.1;2;3;4
tr_cdpcln	CDP-choline transporter	cdpcln[c] <=> cdpcln[m]	(ATEG_09270)	MT
tr_cellob	Cellobiose transporter	cellob[e] <=> cellob[c]	(ATEG_01874) or (ATEG_07917)	MT
tr_chit	Chitin plasma membrane transporter	chit[e] <=> chit[c]		MT
tr_cit	Citrate transporter	cit[e] <=> cit[c]	(ATEG_08996)	MT	2.A.29.7.3
tr_cit	Citrate transport protein	cit[c] <=> cit[m]	(ATEG_05896) or (ATEG_06395) or (ATEG_08996) or (ATEG_09970)	MT	2.A.29.2.3;6
tr_citr	L-citrulline transporter	citr[c] <=> citr[m]		MT
tr_cln	Choline transporter	cln[c] <=> cln[m]	(ATEG_09270)	MT
tr_cln/h	Choline transport protein	cln[e] -> cln[c]	(ATEG_09270)	MT	2.A.3.4.1
tr_co2	CO2 transporter	co2[e] <=> co2[c]		MT
tr_co2	CO2 transporter	co2[c] <=> co2[m]		MT
tr_ctp:h	Cytidine 5'-triphosphate transporter	ctp[m] <=> ctp[c]	(ATEG_03352)	MT	2.A.41.2.7
tr_cys	Amino acid permease	cys[e] <=> cys[c]	(ATEG_04310) or (ATEG_04783) or (ATEG_02308) or (ATEG_05599) or (ATEG_07524) or (ATEG_08419)	MT	2.A.3.10.14;
tr_cyts	Purine-cytosine permease	cyts[e] -> cyts[c]	(ATEG_04414)	MT	2.A.39.2.4
tr_d6pgc	6-phospho-D-gluconate transporter	d6pgc[e] <=> d6pgc[c]	(ATEG_00973) or (ATEG_06443)	MT
tr_dasp	Amino acid permease (Dicarboxylic amino acid permease)	dasp[e] <=> dasp[c]	(ATEG_04310) or (ATEG_04783) or (ATEG_06506) or (ATEG_09028) or (ATEG_09721) or (ATEG_01181) or (ATEG_02308) or (ATEG_05599) or (ATEG_07524) or (ATEG_08419)	MT	2.A.3.10.14;
tr_dglc	D-glucose transporter	dglc[e] -> dglc[c]	(ATEG_01768) or (ATEG_07802) or (ATEG_01032) or (ATEG_02489) or (ATEG_06095) or (ATEG_08609) or (ATEG_09103)	MT	2.A.1.1.33;39;58
tr_dglc:h	D-glucose transporter	h[e] + dglc[e] -> h[c] + dglc[c]	(ATEG_01768) or (ATEG_07802) or (ATEG_07144) or (ATEG_01425) or (ATEG_02870) or (ATEG_03527) or (ATEG_08653) or (ATEG_06180) or (ATEG_08604)	MT	2.A.1.1.33;39;58
tr_doris	Deoxyribose transporter	doris[c] <=> doris[e]	(ATEG_07144) or (ATEG_01425) or (ATEG_02870) or (ATEG_03527) or (ATEG_08653)	MT	2.A.1.1.57;58
tr_dtb	Dethiobiotin transporter	dtb[m] <=> dtb[c]		MT
tr_eth	Alcohol transporter	eth[c] <=> eth[e]	(ATEG_09770) or (ATEG_07694)	MT	2.A.96.2.1
tr_eth	Ethanol transporter	eth[c] <=> eth[m]		MT
tr_fe	Iron transport multicopper oxidase FET3	fe[e] <=> fe[c]	(ATEG_08032) or (ATEG_08031)	MT	9.A.10.1.1
tr_for	Formate transporter	for[e] <=> for[c]		MT
tr_for	Formate MT	for[c] <=> for[m]		MT
tr_fru	MFS monosaccharide transporter	dfru[e] -> dfru[c]	(ATEG_07053) or (ATEG_01425) or (ATEG_02870) or (ATEG_03527) or (ATEG_08653) or (ATEG_01874) or (ATEG_03190) or (ATEG_04800) or (ATEG_07917) or (ATEG_07638) or (ATEG_07791) or (ATEG_07144)	MT	2.A.1.1.33
tr_fum	Fumarate transporter	fum[e] <=> fum[c]		MT
tr_fum/succ	Succinate/fumarate mitochondrial antiporter	succ[c] + fum[m] <=> succ[m] + fum[c]	(ATEG_10097)	MT	2.A.29.13.1
tr_gaba	GABA-specific permease	gaba[c] <=> gaba[e]	(ATEG_01687) or (ATEG_07128) or (ATEG_09408) or (ATEG_02144)	MT	2.A.3.4.2;2.A.3.4.3
tr_gaba	GABA-specific permease	gaba[c] <=> gaba[m]	(ATEG_09408)	MT	2.A.3.4.3
tr_galnt	D-galactonate transporter	galnt[e] <=> galnt[c]	(ATEG_07144) or (ATEG_01425) or (ATEG_02870) or (ATEG_03527) or (ATEG_08653)	MT	2.A.1.1.57;58
tr_gdpman	GDP-mannose importer	gdpman[e] -> gdpman[c]	(ATEG_09457)	MT	2.A.7.13.2
tr_gl:h	Glycerol:H symporter	h[e] + gl[e] <=> h[c] + gl[c]	(ATEG_01874) or (ATEG_04800) or (ATEG_04961) or (ATEG_07638) or (ATEG_07917) or (ATEG_10284) or (ATEG_06000)	MT	2.A.1.1.73;2.A.50.1.1
tr_gl3p	sn-glycerol 3-phosphate transporter	gl3p[c] <=> gl3p[m]		MT
tr_glac	MFS monosaccharide transporter	gal[e] -> gal[c]	(ATEG_01425) or (ATEG_02870) or (ATEG_03527) or (ATEG_08653) or (ATEG_01874) or (ATEG_03190) or (ATEG_04800) or (ATEG_07917) or (ATEG_07638) or (ATEG_07053) or (ATEG_07144)	MT	2.A.1.1.39 2.A.1.1.51 2.A.1.1.68
tr_glcnt	D-gluconate transporter	glcnt[e] <=> glcnt[c]	(ATEG_08653)	MT	2.A.1.1.23
tr_gln	Amino acid permease (Dicarboxylic amino acid permease)	gln[e] <=> gln[c]	(ATEG_04310) or (ATEG_04783) or (ATEG_06506) or (ATEG_09028) or (ATEG_09721) or (ATEG_01181) or (ATEG_02308) or (ATEG_05599) or (ATEG_07524) or (ATEG_08419)	MT	2.A.3.10.14;19
tr_gln	L-glutamine transporter	gln[c] <=> gln[m]		MT	2.A.3.10.5
tr_glu	Amino acid permease (Dicarboxylic amino acid permease)	glu[e] <=> glu[c]	(ATEG_04310) or (ATEG_04783) or (ATEG_06506) or (ATEG_09028) or (ATEG_01181) or (ATEG_02308) or (ATEG_05599) or (ATEG_07524) or (ATEG_08419)	MT	2.A.3.10.13;14;19
tr_glu	glutamate uniporter	glu[m] <=> glu[c]	(ATEG_06442)	MT	2.A.29.14.4
tr_gly	Neutral aliphatic amino acid permease	gly[e] <=> gly[c]	(ATEG_04310) or (ATEG_04783) or (ATEG_06506) or (ATEG_09028) or (ATEG_00961) or (ATEG_01221) or (ATEG_03484) or (ATEG_02308) or (ATEG_05599) or (ATEG_07524) or (ATEG_08419)	MT	2.A.3.10.14;
tr_glybet	Glycine betaine transporter	bet[c] -> bet[m]		MT
tr_glypcln	Glycerophosphocholine transporter	glypcln[e] <=> glypcln[c]	(ATEG_09270)	MT
tr_glypcln	Glycerophosphocholine transporter	glypcln[m] <=> glypcln[c]	(ATEG_09270)	MT
tr_gn	Purine-cytosine permease	gn[e] <=> gn[c]	(ATEG_04414) or (ATEG_09149) or (ATEG_06344)	MT	2.A.1.40.1;2.A.39.2.4
tr_gtp/gdp	Mitochondrial GTP/GDP exchanger	gtp[c] + gdp[m] -> gdp[c] + gtp[m]	(ATEG_10181)	MT	2.A.29.21.1
tr_gua	Guaiacol transporter	gua[c] <=> gua[e]		MT
tr_h2o	H2O transporter	h2o[e] <=> h2o[c]	(ATEG_02146)	MT	1.A.8.6.2
tr_h2o	H2O transporter	h2o[c] <=> h2o[m]		MT
tr_hco3	HCO3 transporter	hco3[m] <=> hco3[c]		MT
tr_hcys	L-homocysteine transporter	hcys[c] -> hcys[m]		MT
tr_his	Amino acid permease	his[e] <=> his[c]	(ATEG_04310) or (ATEG_04783) or (ATEG_02308) or (ATEG_05599) or (ATEG_07524) or (ATEG_08419)	MT	2.A.3.10.14;19
tr_hisan	Hisamine transporter	hisan[c] <=> hisan[e]	(ATEG_02629) or (ATEG_07546)	MT
tr_hno3	Nitrate permease	hno3[e] -> hno3[c]	(ATEG_00476)	MT	2.A.1.8.5
tr_ia	Itaconic acid transporter	ia[c] <=> ia[e]	(ATEG_09972) or (ATEG_06726)	MT
tr_ici	Isocitrate transporter	icit[e] <=> icit[c]	(ATEG_08996)	MT
tr_icit	Isocitrate transporter	mal[m] + icit[c] <=> mal[c] + icit[m]	(ATEG_05896)	MT	2.A.29.2.6
tr_idol	L-iditol transporter	idol[e] -> idol[c]		MT
tr_ile	Neutral aliphatic amino acid permease	ile[e] <=> ile[c]	(ATEG_04310) or (ATEG_04783) or (ATEG_00961) or (ATEG_01221) or (ATEG_03484) or (ATEG_02308) or (ATEG_05599) or (ATEG_07524) or (ATEG_08419)	MT	2.A.3.10.14;19
tr_ile	L-isoleucine transporter	ile[c] <=> ile[m]		MT
tr_imlt:h	Isomaltose H+ symporter	imlt[e] <=> imlt[c]	(ATEG_06443) or (ATEG_00973)	MT	2.A.1.1.11
tr_ins	Myo-inositol transporter	ins[c] <=> ins[e]	(ATEG_08582) or (ATEG_06815)	MT	2.A.1.1.63;2.A.1.1.8
tr_ipyr	Indolepyruvate transporter	ipyr[m] -> ipyr[c]		MT
tr_k/h	K+:H+ antiporter	h[c] + k[e] -> h[e] + k[c]	(ATEG_07793)	MT	2.A.37.4.1
tr_k/h	K+/H+ antiporters	h[c] + k[m] <=> h[m] + k[c]	(ATEG_01647)	MT	2.A.97.1.4
tr_k:h	Potassium ion transporter	h[e] + k[e] -> h[c] + k[c]	(ATEG_09190) or (ATEG_09832) or (ATEG_03234) or (ATEG_05165) or (ATEG_01339)	MT	2.A.38.2.3
tr_kyn	L-kynurenine transporter	kyn[c] -> kyn[m]		MT
tr_lac	(R)-lactate transporter	lac[e] <=> lac[c]	(ATEG_06465) or (ATEG_06379)	MT
tr_lac	(R)-lactate transporter	lac[c] <=> lac[m]		MT
tr_lact	Lactose permease	lact[e] -> lact[c]	(ATEG_09892)	MT	2.A.1.1.9
tr_larab	l-arabinose transporter	larab[e] <=> larab[c]	(ATEG_07144) or (ATEG_01425) or (ATEG_02870) or (ATEG_03527) or (ATEG_08653)	MT	2.A.1.1.57;58
tr_leu	Neutral aliphatic amino acid permease	leu[e] <=> leu[c]	(ATEG_04310) or (ATEG_02412) or (ATEG_04783) or (ATEG_00961) or (ATEG_01221) or (ATEG_03484) or (ATEG_01007) or (ATEG_09774) or (ATEG_02308) or (ATEG_05599) or (ATEG_07524) or (ATEG_08419)	MT	2.A.3.10.14;18;19
tr_leu	L-leucine transporter	leu[m] <=> leu[c]		MT
tr_llac	(S)-lactate transporter	llac[e] <=> llac[c]	(ATEG_06465) or (ATEG_06379)	MT
tr_llac	(S)-lactate transporter	llac[c] <=> llac[m]		MT
tr_lxul	L-Xylulose transporter	lxul[e] -> lxul[c]	(ATEG_01874) or (ATEG_07917)	MT
tr_lys	Amino acid permease	lys[e] <=> lys[c]	(ATEG_04310) or (ATEG_04783) or (ATEG_01200) or (ATEG_09076) or (ATEG_02308) or (ATEG_05599) or (ATEG_07524) or (ATEG_08419)	MT	2.A.3.10.10;14
tr_lys	L-lysine transporter	lys[m] <=> lys[c]		MT
tr_mal/pi	Dicarboxylate:Pi antiporter	mal[c] + pi[e] <=> pi[c] + mal[e]	(ATEG_01268)	MT	2.A.29.2.3
tr_mal/pi	Dicarboxylate carrier	pi[m] + mal[c] <=> pi[c] + mal[m]	(ATEG_01268) or (ATEG_08624)	MT	2.A.29.2.3
tr_man	MFS monosaccharide transporter	man[e] -> man[c]	(ATEG_01425) or (ATEG_02870) or (ATEG_03527) or (ATEG_08653) or (ATEG_01874) or (ATEG_03190) or (ATEG_04800) or (ATEG_07917) or (ATEG_07638) or (ATEG_07053) or (ATEG_07144)	MT	3.2.1.113 2.A.1.1.33
tr_mannan	Mannan transporter	mannan[e] -> mannan[c]	(ATEG_01874) or (ATEG_07917)	MT
tr_meli	Melibiose transporter	meli[e] -> meli[c]	(ATEG_00934)	MT	2.A.2.1.2
tr_met	Amino acid permease	met[e] <=> met[c]	(ATEG_05312) or (ATEG_04310) or (ATEG_04783) or (ATEG_02308) or (ATEG_05599) or (ATEG_07524) or (ATEG_08419)	MT	2.A.3.8.4;2.A.3.10.14;19
tr_methol	Methanol transporter	meth[e] <=> meth[c]		MT
tr_methol	Methanol transporter	meth[c] <=> meth[m]		MT
tr_mlt	Maltose permease	mlt[e] -> mlt[c]	(ATEG_00973) or (ATEG_01028) or (ATEG_01088) or (ATEG_01486) or (ATEG_01791) or (ATEG_07936)	MT	2.A.1.1.10 2.A.1.2.23
tr_mlt:h	Maltose/sucrose H : symporter	mlt[e] -> mlt[c]	(ATEG_01622)	MT	2.A.2.6.1
tr_mnt	D-mannitol transporter	mnt[e] <=> mnt[c]		MT
tr_na	Sodium transporter	na[m] <=> na[c]		MT
tr_na/h	Na+/H+ Exchanger	h[c] + na[e] <=> h[e] + na[c]	(ATEG_10029) or (ATEG_09409)	MT	2.A.36.4.1;2.A.36.1.12
tr_nad	The NAD+ transporter	nad[c] <=> nad[m]	(ATEG_05552)	MT	2.A.29.27.1
tr_nag	N-acetylglucosamine:H+ symporter	nag[e] -> nag[c]	(ATEG_10316) or (ATEG_08414) or (ATEG_00023)	MT	2.A.1.58.1
tr_nh3	Ammonium transporter	nh3[e] -> nh3[c]	(ATEG_00290) or (ATEG_06778) or (ATEG_07699) or (ATEG_05000)	MT	1.A.11.3.3
tr_o2	Oxygen transporter	o2[e] <=> o2[c]		MT
tr_o2	Oxygen transporter	o2[c] <=> o2[m]		MT
tr_oa/pi	Dicarboxylate:Pi antiporter	oa[e] + pi[c] <=> oa[c] + pi[e]	(ATEG_08624)	MT	2.A.29.2.3
tr_oa/pi	Dicarboxylate:Pi antiporter	oa[c] + pi[m] <=> oa[m] + pi[c]	(ATEG_08624) or (ATEG_02040)	MT	2.A.29.2.3
tr_orn	Amino acid transporter arg-13	orn[m] <=> orn[c]	(ATEG_10389)	MT	2.A.29.9.1
tr_ota	Ochratoxin A transporter	ota[c] <=> ota[e]		MT
tr_oxal	Oxalate transporter	oxal[e] <=> oxal[c]		MT
tr_p	CMP transporter	cmp[m] <=> cmp[c]		MT
tr_pap	adenosine 3',5'-bisphosphate transporter	pap[c] <=> pap[m]		MT
tr_pcln	choline phosphate transporter	pcln[e] <=> pcln[c]	(ATEG_09270)	MT
tr_pcln	choline phosphate transporter	pcln[m] <=> pcln[c]	(ATEG_09270)	MT
tr_pep	phosphoenolpyruvate transporter	pep[c] <=> pep[m]	(ATEG_06395) or (ATEG_08996)	MT
tr_phe	Aromatic amino acid permease	phe[e] <=> phe[c]	(ATEG_04310) or (ATEG_02412) or (ATEG_04783) or (ATEG_00961) or (ATEG_01221) or (ATEG_03484) or (ATEG_01007) or (ATEG_09774) or (ATEG_02308) or (ATEG_05599) or (ATEG_07524) or (ATEG_08419)	MT	2.A.3.10.14;18;19
tr_phe	L-phenylalanine transporter	phe[c] -> phe[m]		MT
tr_pi	cytoplasm phosphate carrier	pi[e] <=> + pi[c]	(ATEG_02164) or (ATEG_08938)	MT	2.A.1.9.1;2.A.1.9.2
tr_pnto	Pantothenate:H+ symporter	pnto[e] <=> pnto[c]	(ATEG_06166) or (ATEG_07326)	MT	2.A.1.14.17;18
tr_pro	Amino acid permease	pro[e] <=> pro[c]	(ATEG_05296) or (ATEG_04310) or (ATEG_04783) or (ATEG_08658) or (ATEG_02308) or (ATEG_05599) or (ATEG_07524) or (ATEG_08419)	MT	2.A.3.10.22
tr_pro	L-proline transporter	pro[c] <=> pro[m]		MT
tr_pyr	Pyruvate transporter	pyr[e] <=> pyr[c]	(ATEG_06465) or (ATEG_06379)	MT
tr_pyr	Pyruvate transporter	pyr[c] <=> pyr[m]	(ATEG_05896)	MT
tr_qt	Quinate permease	qt[e] <=> qt[c]	(ATEG_07785) or (ATEG_00349) or (ATEG_01414)	MT	2.A.1.1.7
tr_rib	Ribose transporter	rib[e] -> rib[c]	(ATEG_01874) or (ATEG_07917)	MT
tr_rl	D-Ribulose transporter	rl[e] -> rl[c]	(ATEG_01874) or (ATEG_07917)	MT
tr_Sali	Salicylate transporter	sali[c] <=> sali[e]		MT
tr_satn	Allantoin permease	satn[e] -> satn[c]	(ATEG_00521)	MT	2.A.39.3.1
tr_ser	Amino acid permease	ser[e] <=> ser[c]	(ATEG_04310) or (ATEG_04783) or (ATEG_06506) or (ATEG_09028) or (ATEG_02308) or (ATEG_05599) or (ATEG_07524) or (ATEG_08419)	MT	2.A.3.10.13;14;19
tr_slf	Sulfate transporter	slf[e] -> slf[c]	(ATEG_02570) or (ATEG_03129)	MT	2.A.53.1.2;2.A.29.15.1
tr_slfi	Sulfite efflux pump	slfi[c] -> slfi[e]	(ATEG_03522)	MT	2.A.16.4.1
tr_sor	Sorbose transporter	sor[e] -> sor[c]	(ATEG_01874) or (ATEG_07917)	MT
tr_sot	D-sorbitol transporter	sot[e] <=> sot[c]		MT
tr_spere	spermine:H antiporter	spere[c] <=> spere[e]	(ATEG_01202) or (ATEG_06818) or (ATEG_08389) or (ATEG_09150)	MT	2.A.1.2.16
tr_sphe	Sphingenine transporter	sphe[e] -> sphe[c]	(ATEG_05959)	MT	2.A.6.6.3
tr_sphep	ATP-binding cassette	sphep[c] <=> sphep[e]	(ATEG_06502)	MT	3.A.1.211.1
tr_sprmd	spermidine:H antiporter	sprmd[c] <=> sprmd[e]	(ATEG_01202) or (ATEG_06818) or (ATEG_08389) or (ATEG_09150)	MT	2.A.1.2.16
tr_star	Starch transporter	star[e] -> star[c]		MT
tr_succ/pi	Dicarboxylate:Pi antiporter	succ[c] + pi[e] <=> pi[c] + succ[e]	(ATEG_01268)	MT	2.A.29.2.3
tr_succ/pi	Dicarboxylate carrier	succ[c] + pi[m] <=> succ[m] + pi[c]	(ATEG_01268) or (ATEG_08624)	MT	2.A.29.2.3
tr_thr	Amino acid permease	thr[e] <=> thr[c]	(ATEG_04310) or (ATEG_04783) or (ATEG_02308) or (ATEG_05599) or (ATEG_07524) or (ATEG_08419)	MT	2.A.3.10.14;19
tr_thr	L-threonine transporter	thr[c] <=> thr[m]		MT
tr_tre	Alpha,alpha-trehalose transporter	tre[e] <=> tre[c]	(ATEG_06443) or (ATEG_00973)	MT	2.A.1.1.11
tr_trp	Aromatic amino acid permease	trp[e] <=> trp[c]	(ATEG_04310) or (ATEG_02412) or (ATEG_04783) or (ATEG_00961) or (ATEG_01221) or (ATEG_03484) or (ATEG_01007) or (ATEG_09774) or (ATEG_02308) or (ATEG_05599) or (ATEG_07524) or (ATEG_08419)	MT	2.A.3.10.14;18;19
tr_trp	L-tryptophan transporter	trp[c] <=> trp[m]		MT
tr_tyr	Aromatic amino acid permease	tyr[e] <=> tyr[c]	(ATEG_04310) or (ATEG_02412) or (ATEG_04783) or (ATEG_00961) or (ATEG_01221) or (ATEG_03484) or (ATEG_00961) or (ATEG_01221) or (ATEG_03484) or (ATEG_01007) or (ATEG_09774) or (ATEG_02308) or (ATEG_05599) or (ATEG_07524) or (ATEG_08419)	MT	2.A.18.4.2;2.A.3.10.14;18;19
tr_ura	Uracil permease	ura[e] -> ura[c]	(ATEG_00521) or (ATEG_09129)	MT	2.A.39.3.2
tr_urate	Uric acid-xanthine permease	urate[c] -> urate[e]	(ATEG_01024)	MT	2.A.40.4.1	(Kumar et al., 2010)
tr_urea	Urea active transporter	urea[e] <=> urea[c]	(ATEG_02629) or (ATEG_07546)	MT	2.A.21.6.1;2
tr_urea	Urea active transporter	urea[c] <=> urea[m]	(ATEG_02629) or (ATEG_07546)	MT	2.A.21.6.1;2
tr_uri	uridine permease	uri[e] -> uri[c]	(ATEG_00521)	MT	2.A.39.3.3
tr_val	Neutral aliphatic amino acid permease	val[e] <=> val[c]	(ATEG_04310) or (ATEG_04783) or (ATEG_00961) or (ATEG_01221) or (ATEG_03484) or (ATEG_02308) or (ATEG_05599) or (ATEG_07524) or (ATEG_08419)	MT	2.A.3.10.14;19
tr_val	L-valine transporter	val[c] <=> val[m]		MT
tr_vb2	Vitamin B2 transporter	vb2[c] <=> vb2[e]		MT
tr_ve	Vitamin E transporter	ve[c] <=> ve[e]		MT
tr_xol	Xylitol transporter	xol[e] <=> xol[c]		MT
tr_xul	D-Xylulose transporter	xul[e] -> xul[c]	(ATEG_01874) or (ATEG_07917)	MT
tr_xyl	D-xylose transporter	xyl[e] -> xyl[c]	(ATEG_05973) or (ATEG_08747) or (ATEG_05978) or (ATEG_08245) or (ATEG_02556)	MT	2.A.1.1.40
tr_xylan	Xylans transporter	xylan[e] <=> xylan[c]	(ATEG_01874) or (ATEG_07917)	MT
r0890	Adenylate kinase	amp[c] + itp[c] <=> adp[c] + idp[c]	(ATEG_02545) or (ATEG_10203)	NM	2.7.4.3
r0891	Adenylate kinase	amp[m] + itp[m] <=> adp[m] + idp[m]	(ATEG_02545) or (ATEG_10203)	NM	2.7.4.3
r0892	Uridine kinase	gtp[c] + uri[c] -> h[c] + gdp[c] + ump[c]	(ATEG_06732)	NM	2.7.1.48
r0893	Uridine kinase	atp[c] + uri[c] -> h[c] + adp[c] + ump[c]	(ATEG_06732)	NM	2.7.1.48
r0894	Uridine kinase	gtp[c] + cytd[c] -> h[c] + gdp[c] + cmp[c]	(ATEG_06732)	NM	2.7.1.48
r0895	Adenylate kinase	2 adp[m] <=> h[m] + atp[m] + amp[m]	(ATEG_02545) or (ATEG_10203)	NM	2.7.4.3
r0896	Adenylate kinase	adp[m] + gdp[m] <=> h[m] + amp[m] + gtp[m]	(ATEG_02545) or (ATEG_10203)	NM	2.7.4.3
r0897	nucleoside-diphosphatase	h2o[c] + udp[c] -> 2 h[c] + pi[c] + ump[c]	(ATEG_00414) or (ATEG_07658)	NM	3.6.1.6
r0898	dITP/XTP pyrophosphatase	h2o[c] + gtp[c] -> 2 h[c] + ppi[c] + gmp[c]	(ATEG_09473)	NM:Purine Metabolism	3.6.1.19
r0899	dITP/XTP pyrophosphatase	h2o[c] + dgtp[c] -> 2 h[c] + ppi[c] + dgmp[c]	(ATEG_09473)	NM:Purine Metabolism	3.6.1.19
r0900	dITP/XTP pyrophosphatase	h2o[c] + xtp[c] -> 2 h[c] + ppi[c] + xmp[c]	(ATEG_09473)	NM:Purine Metabolism	3.6.1.19
r0901	dITP/XTP pyrophosphatase	h2o[c] + ditp[c] -> ppi[c] + dimp[c]	(ATEG_09473)	NM:Purine Metabolism	3.6.1.19
r0902	nucleoside-diphosphate kinase	atp[c] + didp[c] <=> adp[c] + ditp[c]	(ATEG_08066)	NM:Purine metabolism	2.7.4.6
r0903	purine-nucleoside phosphorylase	pi[c] + gsn[c] <=> r1p[c] + gn[c]	(ATEG_05630)	NM:Purine metabolism	2.4.2.1
r0904	5-hydroxyisourate hydrolase	h2o[c] + hiura[c] -> h[c] + houdhic[c]	(ATEG_04669)	NM:Purine metabolism	3.5.2.17	AsperCyc
r0905	URAD	houdhic[c] -> co2[c] + satn[c]	(ATEG_10346) or (ATEG_08851)	NM:Purine metabolism	4.1.1.-
r0906	Adenylate cyclase	gtp[c] -> h[c] + ppi[c] + cgmp[c]	(ATEG_05799)	NM:Purine metabolism	4.6.1.1
r0907	allantoate deiminase	h2o[c] + 2 h[c] + att[c] -> nh3[c] + co2[c] + ugly[c]	(ATEG_03304)	NM:Purine metabolism	3.5.3.9
r0908	ureidoglycine aminohydrolase	h2o[c] + ugly[c] -> nh3[c] + uglx[c]	(ATEG_03642)	NM:Purine metabolism	3.5.3.-	AsperCyc
r0909	Nucleoside diphosphate kinase	atp[c] + gdp[c] <=> adp[c] + gtp[c]	(ATEG_08066)	NM:Purine metabolism	2.7.4.6
r0910	Nucleoside diphosphate kinase	atp[c] + dgdp[c] <=> adp[c] + dgtp[c]	(ATEG_08066)	NM:Purine metabolism	2.7.4.6
r0911	Nucleoside diphosphate kinase	atp[c] + dadp[c] <=> adp[c] + datp[c]	(ATEG_08066)	NM:Purine metabolism	2.7.4.6
r0912	Guanylate kinase	atp[c] + h[c] + gmp[c] <=> adp[c] + gdp[c]		NM:Purine metabolism	2.7.4.8
r0913	Guanylate kinase	atp[c] + h[c] + dgmp[c] <=> adp[c] + dgdp[c]		NM:Purine metabolism	2.7.4.8
r0914	phosphoribosylaminoimidazolesuccinocarboxamide synthase	asp[c] + atp[c] + cair[c] <=> 2 h[c] + pi[c] + adp[c] + saicar[c]	(ATEG_08807)	NM:Purine metabolism	6.3.2.6
r0915	phosphoribosylformylglycinamidine cyclo-ligase	atp[c] + fgam[c] -> h[c] + pi[c] + adp[c] + air[c]	(ATEG_06974)	NM:Purine metabolism	6.3.3.1
r0916	phosphoribosylamine-glycine ligase	gly[c] + atp[c] + pram[c] -> h[c] + pi[c] + adp[c] + gar[c]	(ATEG_06974)	NM:Purine metabolism	6.3.4.13
r0917	Adenylosuccinate synthase	asp[c] + gtp[c] + imp[c] -> 2 h[c] + pi[c] + gdp[c] + asuc[c]	(ATEG_05239)	NM:Purine metabolism	6.3.4.4
r0918	GMP synthase	h2o[c] + gln[c] + atp[c] + xmp[c] -> glu[c] + 3 h[c] + amp[c] + ppi[c] + gmp[c]	(ATEG_09104)	NM:Purine metabolism	6.3.5.2
r0919	phosphoribosylformylglycinamidine synthase	h2o[c] + gln[c] + atp[c] + fgar[c] -> glu[c] + h[c] + pi[c] + adp[c] + fgam[c]	(ATEG_09239)	NM:Purine metabolism	6.3.5.3
r0920	Nucleoside diphosphate kinase	atp[c] + idp[c] <=> adp[c] + itp[c]	(ATEG_08066)	NM:Purine metabolism	2.7.4.6
r0921	dITP/XTP pyrophosphatase	h2o[c] + itp[c] -> 2 h[c] + ppi[c] + imp[c]	(ATEG_09473)	NM:Purine Metabolism	3.6.1.19
r0922	Xanthine dehydrogenase	h2o[c] + nad[c] + hyxn[c] -> h[c] + nadh[c] + xan[c]	(ATEG_03959) or (ATEG_08616)	NM:Purine metabolism	1.17.1.4	AsperCyc
r0923	xanthine dehydrogenase	h2o[c] + nad[c] + xan[c] -> h[c] + nadh[c] + urate[c]	(ATEG_03959) or (ATEG_08616)	NM:Purine metabolism	1.17.1.4
r0924	ribonucleoside-diphosphate reductase	adp[c] + rthio[c] -> h2o[c] + othio[c] + dadp[c]	(ATEG_05560 and ATEG_02041)	NM:Purine metabolism	1.17.4.1
r0925	ribonucleoside-diphosphate reductase	rthio[c] + gdp[c] -> h2o[c] + othio[c] + dgdp[c]	(ATEG_05560 and ATEG_02041)	NM:Purine metabolism	1.17.4.1
r0926	urate oxidase	h2o[c] + o2[c] + urate[c] <=> h2o2[c] + hiura[c]	(ATEG_01520)	NM:Purine metabolism	1.7.3.3
r0927	IMP dehydrogenase	h2o[c] + nad[c] + imp[c] -> h[c] + nadh[c] + xmp[c]	(ATEG_09528) or (ATEG_02939)	NM:Purine metabolism	1.1.1.205
r0928	purine-nucleoside phosphorylase	ad[c] + dr1p[c] <=> pi[c] + da[c]	(ATEG_06619) or (ATEG_06620) or (ATEG_05630)	NM:Purine metabolism	2.4.2.1
r0929	purine-nucleoside phosphorylase	pi[c] + din[c] <=> hyxn[c] + dr1p[c]	(ATEG_06619) or (ATEG_06620) or (ATEG_05630)	NM:Purine metabolism	2.4.2.1
r0930	purine-nucleoside phosphorylase	pi[c] + inos[c] -> r1p[c] + hyxn[c]	(ATEG_06619) or (ATEG_06620) or (ATEG_05630)	NM:Purine metabolism	2.4.2.1
r0931	purine-nucleoside phosphorylase	gn[c] + dr1p[c] <=> pi[c] + dg[c]	(ATEG_06619) or (ATEG_06620) or (ATEG_05630)	NM:Purine metabolism	2.4.2.1
r0932	purine-nucleoside phosphorylase	pi[c] + xtsine[c] <=> r1p[c] + xan[c]	(ATEG_06619) or (ATEG_06620) or (ATEG_05630)	NM:Purine metabolism	2.4.2.1
r0933	amidophosphoribosyltransferase	h2o[c] + gln[c] + prpp[c] -> glu[c] + h[c] + ppi[c] + pram[c]	(ATEG_07089)	NM:Purine metabolism	2.4.2.14
r0934	Adenine phosphoribosyltransferase	ad[c] + prpp[c] <=> h[c] + amp[c] + ppi[c]	(ATEG_01863)	NM:Purine metabolism	2.4.2.7
r0935	Adenylate kinase (deoxy)	adp[c] + dadp[c] <=> atp[c] + h[c] + damp[c]	(ATEG_02545)	NM:Purine metabolism	2.7.4.11
r0936	Adenylate kinase	2 adp[c] <=> atp[c] + h[c] + amp[c]	(ATEG_02545) or (ATEG_10203)	NM:Purine metabolism	2.7.4.3
r0937	Adenylate kinase	adp[c] + gdp[c] <=> h[c] + amp[c] + gtp[c]	(ATEG_02545) or (ATEG_10203)	NM:Purine metabolism	2.7.4.3
r0938	5'-nucleotidase	h2o[c] + amp[c] -> pi[c] + adn[c]	(ATEG_00939) or (ATEG_00940)	NM:Purine metabolism	3.1.3.5
r0939	5'-nucleotidase	h2o[c] + damp[c] -> pi[c] + da[c]	(ATEG_00939) or (ATEG_00940)	NM:Purine metabolism	3.1.3.5
r0940	5'-nucleotidase	h2o[c] + imp[c] -> pi[c] + inos[c]	(ATEG_00939) or (ATEG_00940)	NM:Purine metabolism	3.1.3.5
r0941	5'-nucleotidase	h2o[c] + gmp[c] -> pi[c] + gsn[c]	(ATEG_00939) or (ATEG_00940)	NM:Purine metabolism	3.1.3.5
r0942	5'-nucleotidase	h2o[c] + dgmp[c] -> pi[c] + dg[c]	(ATEG_00939) or (ATEG_00940)	NM:Purine metabolism	3.1.3.5
r0943	5'-nucleotidase	h2o[c] + xmp[c] -> pi[c] + xtsine[c]	(ATEG_00939) or (ATEG_00940)	NM:Purine metabolism	3.1.3.5
r0944	3',5'-cyclic-nucleotide phosphodiesterase	h2o[c] + camp[c] -> h[c] + amp[c]	(ATEG_02567) or (ATEG_00860)	NM:Purine metabolism	3.1.4.17
r0945	3',5'-cyclic-nucleotide phosphodiesterase	h2o[c] + cgmp[c] -> h[c] + gmp[c]	(ATEG_02567) or (ATEG_00860)	NM:Purine metabolism	3.1.4.17
r0946	3',5'-cyclic-nucleotide phosphodiesterase	h2o[c] + ccmp[c] -> h[c] + cmp[c]	(ATEG_02567) or (ATEG_00860)	NM:Purine metabolism	3.1.4.17
r0947	Allantoinase	h2o[c] + satn[c] <=> att[c]	(ATEG_05687)	NM:Purine metabolism	3.5.2.5
r0948	5-aminoimidazole-4-carboxamide ribonucleotide (AICAR) transformylase / IMP cyclohydrolase	prfica[c] <=> h2o[c] + imp[c]	(ATEG_05435)	NM:Purine metabolism	3.5.4.10
r0949	Adenine deaminase	h2o[c] + h[c] + ad[c] -> nh3[c] + hyxn[c]	(ATEG_09863)	NM:Purine metabolism	3.5.4.2
r0950	guanine deaminase	h2o[c] + h[c] + gn[c] -> nh3[c] + xan[c]	(ATEG_02491) or (ATEG_02192) or (ATEG_07122)	NM:Purine metabolism	3.5.4.3
r0951	Adenosine deaminase	h2o[c] + h[c] + adn[c] -> nh3[c] + inos[c]	(ATEG_09863) or (ATEG_00525) or (ATEG_02641) or (ATEG_08945)	NM:Purine metabolism	3.5.4.4
r0952	Adenosine deaminase	h2o[c] + h[c] + da[c] -> nh3[c] + din[c]	(ATEG_09863) or (ATEG_00525) or (ATEG_02641) or (ATEG_08945)	NM:Purine metabolism	3.5.4.4
r0953	AMP deaminase	h2o[c] + h[c] + amp[c] -> nh3[c] + imp[c]	(ATEG_10402)	NM:Purine metabolism	3.5.4.6
r0954	ADP-ribose diphosphatase	h2o[c] + adprib[c] -> 2 h[c] + amp[c] + r5p[c]	(ATEG_06377) or (ATEG_08277)	NM:Purine metabolism	3.6.1.13
r0955	phosphoribosylaminoimidazole carboxylase	h[c] + cair[c] <=> co2[c] + air[c]	(ATEG_03144)	NM:Purine metabolism	4.1.1.21
r0956	adenylosuccinate lyase	saicar[c] <=> fum[c] + aicar[c]	(ATEG_01133)	NM:Purine metabolism	4.3.2.2
r0957	adenylosuccinate lyase	asuc[c] -> amp[c] + fum[c]	(ATEG_01133)	NM:Purine metabolism	4.3.2.2
r0958	Adenylate cyclase	atp[c] -> h[c] + ppi[c] + camp[c]	(ATEG_05799)	NM:Purine metabolism	4.6.1.1
r0959	xanthine phosphoribosyltransferase	prpp[c] + xan[c] -> h[c] + ppi[c] + xmp[c]	(ATEG_02747)	NM:Purine metabolism	2.4.2.22
r0960	Hypoxanthine phosphoribosyltransferase	prpp[c] + hyxn[c] -> h[c] + ppi[c] + imp[c]	(ATEG_02747)	NM:Purine metabolism	2.4.2.8
r0961	Hypoxanthine phosphoribosyltransferase	prpp[c] + gn[c] -> h[c] + ppi[c] + gmp[c]	(ATEG_02747)	NM:Purine metabolism	2.4.2.8
r0962	Adenosine kinase	atp[c] + adn[c] -> h[c] + amp[c] + adp[c]	(ATEG_09393)	NM:Purine metabolism	2.7.1.20
r0963	nucleoside-diphosphatase	h2o[c] + gdp[c] -> 2 h[c] + pi[c] + gmp[c]	(ATEG_00414) or (ATEG_07658)	NM:Purine metabolism	3.6.1.6
r0964	dITP/XTP pyrophosphatase	h2o[c] + utp[c] -> 2 h[c] + ppi[c] + ump[c]	(ATEG_09473)	NM:Pyrimidine metabolism	3.6.1.19
r0965	nucleoside-diphosphate kinase	atp[c] + dudp[c] <=> adp[c] + dutp[c]	(ATEG_08066)	NM:Pyrimidine metabolism	2.7.4.6
r0966	dTMP kinase	atp[c] + h[c] + dump[c] <=> adp[c] + dudp[c]	(ATEG_08069)	NM:Pyrimidine metabolism	2.7.4.9
r0967	dihydropyrimidinase	h2o[c] + dhthy[c] -> h[c] + uibut[c]	(ATEG_05752) or (ATEG_09062)	NM:Pyrimidine metabolism	3.5.2.2
r0968	Cytosine deaminase	h2o[c] + h[c] + cyts[c] -> nh3[c] + ura[c]	(ATEG_02573) or (ATEG_02994)	NM:Pyrimidine metabolism	3.5.4.1
r0969	dCMP deaminase	h2o[c] + h[c] + dcmp[c] -> nh3[c] + dump[c]	(ATEG_05067) or (ATEG_05617)	NM:Pyrimidine metabolism	3.5.4.12
r0970	cytidine deaminase	h2o[c] + h[c] + cytd[c] -> nh3[c] + uri[c]	(ATEG_10390)	NM:Pyrimidine metabolism	3.5.4.5
r0971	dUTP pyrophosphatase	h2o[c] + dutp[c] -> 2 h[c] + ppi[c] + dump[c]	(ATEG_02519) or (ATEG_00665)	NM:Pyrimidine metabolism	3.6.1.23
r0972	cytidine deaminase	h2o[c] + h[c] + dc[c] -> nh3[c] + du[c]	(ATEG_10390)	NM:Pyrimidine metabolism	3.5.4.5
r0973	Nucleoside diphosphate kinase	atp[c] + udp[c] <=> adp[c] + utp[c]	(ATEG_08066)	NM:Pyrimidine metabolism	2.7.4.6
r0974	Nucleoside diphosphate kinase	atp[c] + cdp[c] <=> adp[c] + ctp[c]	(ATEG_08066)	NM:Pyrimidine metabolism	2.7.4.6
r0975	Nucleoside diphosphate kinase	atp[c] + dcdp[c] <=> adp[c] + dctp[c]	(ATEG_08066)	NM:Pyrimidine metabolism	2.7.4.6
r0976	Nucleoside diphosphate kinase	atp[c] + dtdp[c] <=> adp[c] + dttp[c]	(ATEG_08066)	NM:Pyrimidine metabolism	2.7.4.6
r0977	dTMP kinase	atp[c] + h[c] + dtmp[c] <=> adp[c] + dtdp[c]	(ATEG_08069)	NM:Pyrimidine metabolism	2.7.4.9
r0978	CTP synthase	h2o[c] + gln[c] + atp[c] + utp[c] -> glu[c] + 2 h[c] + pi[c] + adp[c] + ctp[c]	(ATEG_08918)	NM:Pyrimidine metabolism	6.3.4.2
r0979	CTP synthase	nh3[c] + atp[c] + utp[c] -> 2 h[c] + pi[c] + adp[c] + ctp[c]	(ATEG_08918)	NM:Pyrimidine metabolism	6.3.4.2
r0980	Carbamoyl-phosphate synthase (glutamine-hydrolysing)	h2o[c] + gln[c] + 2 atp[c] + hco3[c] -> glu[c] + 2 h[c] + pi[c] + 2 adp[c] + cap[c]	(ATEG_04441) or (ATEG_05040)	NM:Pyrimidine metabolism	6.3.5.5
r0981	ribonucleoside-diphosphate reductase	rthio[c] + cdp[c] -> h2o[c] + othio[c] + dcdp[c]	(ATEG_05560 and ATEG_02041)	NM:Pyrimidine metabolism	1.17.4.1
r0982	ribonucleoside-diphosphate reductase	rthio[c] + udp[c] -> h2o[c] + othio[c] + dudp[c]	(ATEG_05560 and ATEG_02041)	NM:Pyrimidine metabolism	1.17.4.1
r0983	orotate reductase (NADH)	nad[m] + doroa[c] -> nadh[m] + h[c] + oroa[c]	(ATEG_01477)	NM:Pyrimidine metabolism	1.3.1.14
r0984	dihydroorotate oxidase	o2[c] + doroa[c] -> h2o2[c] + oroa[c]	(ATEG_01477)	NM:Pyrimidine metabolism	1.3.3.1
r0985	thioredoxin reductase (NADPH)	h[c] + nadph[c] + othio[c] -> nadp[c] + rthio[c]	(ATEG_03181)	NM:Pyrimidine metabolism	1.8.1.9
r0986	Thymidylate synthase	metthf[c] + dump[c] <=> dhf[c] + dtmp[c]	(ATEG_10109)	NM:Pyrimidine metabolism	2.1.1.45
r0987	aspartate carbamoyltransferase	asp[c] + cap[c] -> h[c] + pi[c] + caasp[c]	(ATEG_04441) or (ATEG_05040) or (ATEG_09347)	NM:Pyrimidine metabolism	2.1.3.2
r0988	Purine-nucleoside phosphorylase	pi[c] + du[c] -> dr1p[c] + ura[c]	(ATEG_06619) or (ATEG_06620) or (ATEG_05630)	NM:Pyrimidine metabolism	2.4.2.1
r0989	Purine-nucleoside phosphorylase	pi[c] + dt[c] -> dr1p[c] + thy[c]	(ATEG_06619) or (ATEG_06620) or (ATEG_05630)	NM:Pyrimidine metabolism	2.4.2.1
r0990	Orotate phosphoribosyltransferase	prpp[c] + oroa[c] <=> h[c] + ppi[c] + omp[c]	(ATEG_01448)	NM:Pyrimidine metabolism	2.4.2.10
r0991	uracil phosphoribosyltransferase	prpp[c] + ura[c] -> h[c] + ppi[c] + ump[c]	(ATEG_09482) or (ATEG_02324) or (ATEG_07297) or (ATEG_07298)	NM:Pyrimidine metabolism	2.4.2.9
r0992	Cytidylate kinase	adp[c] + udp[c] <=> atp[c] + h[c] + ump[c]	(ATEG_04280) or (ATEG_00566)	NM:Pyrimidine metabolism	2.7.4.14
r0993	Cytidylate kinase	adp[c] + cdp[c] <=> atp[c] + h[c] + cmp[c]	(ATEG_04280) or (ATEG_00566)	NM:Pyrimidine metabolism	2.7.4.14
r0994	cytidylate kinase	atp[c] + h[c] + dcmp[c] <=> adp[c] + dcdp[c]	(ATEG_04280) or (ATEG_00566)	NM:Pyrimidine metabolism	2.7.4.14
r0995	Adenylate kinase	adp[c] + udp[c] <=> h[c] + amp[c] + utp[c]	(ATEG_02545) or (ATEG_10203)	NM:Pyrimidine metabolism	2.7.4.3
r0996	Adenylate kinase	adp[c] + cdp[c] <=> h[c] + amp[c] + ctp[c]	(ATEG_02545) or (ATEG_10203)	NM:Pyrimidine metabolism	2.7.4.3
r0997	5'-nucleotidase	h2o[c] + ump[c] -> pi[c] + uri[c]	(ATEG_00939) or (ATEG_00940)	NM:Pyrimidine metabolism	3.1.3.5
r0998	5'-nucleotidase	h2o[c] + cmp[c] -> pi[c] + cytd[c]	(ATEG_00939) or (ATEG_00940)	NM:Pyrimidine metabolism	3.1.3.5
r0999	5'-nucleotidase	h2o[c] + dcmp[c] -> pi[c] + dc[c]	(ATEG_00939) or (ATEG_00940)	NM:Pyrimidine metabolism	3.1.3.5
r1000	5'-nucleotidase	h2o[c] + dump[c] -> pi[c] + du[c]	(ATEG_00939) or (ATEG_00940)	NM:Pyrimidine metabolism	3.1.3.5
r1001	5'-nucleotidase	h2o[c] + dtmp[c] -> pi[c] + dt[c]	(ATEG_00939) or (ATEG_00940)	NM:Pyrimidine metabolism	3.1.3.5
r1002	Dihydroorotase	h2o[c] + doroa[c] <=> h[c] + caasp[c]	(ATEG_05148) or (ATEG_04441) or (ATEG_05040) or (ATEG_09347)	NM:Pyrimidine metabolism	3.5.2.3
r1003	Orotidine-5'-phosphate decarboxylase	h[c] + omp[c] -> co2[c] + ump[c]	(ATEG_09675)	NM:Pyrimidine metabolism	4.1.1.23
r1004	Carbamoyl-phosphate synthase (glutamine-hydrolysing)	h2o[m] + 2 atp[m] + hco3[m] + gln[m] -> glu[m] + 2 h[m] + pi[m] + cap[m] + 2 adp[m]	(ATEG_05040) or (ATEG_09347 and ATEG_08689 and ATEG_04441)	NM:Pyrimidine metabolism;AA:Alanine, aspartate and glutamate metabolism	6.3.5.5
r1005	aldehyde dehydrogenase (NAD+)	h2o[c] + nad[c] + aproa[c] -> 2 h[c] + nadh[c] + bala[c]	(ATEG_05020) or (ATEG_03231) or (ATEG_03101)	OA:beta-Alanine metabolism	1.2.1.3
r1006	aldehyde dehydrogenase (NAD+)	h2o[c] + nad[c] + gabal[c] -> 2 h[c] + nadh[c] + gaba[c]	(ATEG_05020) or (ATEG_03231) or (ATEG_03101)	OA:beta-Alanine metabolism	1.2.1.3
r1007	primary-amine oxidase	h2o[c] + o2[c] + daprp[c] -> h2o2[c] + nh3[c] + aproa[c]	(ATEG_09135) or (ATEG_08102) or (ATEG_04298)	OA:beta-Alanine metabolism	1.4.3.21
r1008	Polyamine oxidase	h2o[c] + o2[c] + aspermd[c] -> h2o2[c] + ptrsc[c] + aaproa[c]	(ATEG_05903) or (ATEG_07129)	OA:beta-Alanine metabolism	1.5.3.17;1.5.3.16
r1009	Polyamine oxidase	h2o[c] + o2[c] + spere[c] -> h2o2[c] + sprmd[c] + aproa[c]	(ATEG_05903) or (ATEG_07129)	OA:beta-Alanine metabolism	1.5.3.17;1.5.3.16
r1010	Deoxyhypusine synthase	h2o[c] + sprmd[c] + q[m] -> qh2[m] + gabal[c] + daprp[c]	(ATEG_09791)	OA:beta-Alanine metabolism	1.5.99.6
r1011	cyanide hydratase	h2o[c] + hcya[c] -> frid[c]	(ATEG_03212)	OA:CyanoAA	4.2.1.66
r1012	Glutamate-cysteine ligase	glu[c] + atp[c] + cys[c] -> h[c] + pi[c] + adp[c] + gc[c]	(ATEG_04041)	OA:Glutathione metabolism	6.3.2.2
r1013	Glutathione synthase	gly[c] + atp[c] + gc[c] -> h[c] + pi[c] + adp[c] + gsh[c]	(ATEG_04384) or (ATEG_09363)	OA:Glutathione metabolism	6.3.2.3
r1014	glutathione:hydrogen-peroxide oxidoreductase;Glutathione peroxidase	h2o2[c] + 2 gsh[c] -> 2 h2o[c] + gssg[c]	(ATEG_01487) or (ATEG_07460) or (ATEG_04161)	OA:Glutathione metabolism	1.11.1.9
r1015	glutathione-disulfide reductase	h[c] + nadph[c] + gssg[c] -> nadp[c] + 2 gsh[c]	(ATEG_05186)	OA:Glutathione metabolism	1.8.1.7
r1016	glutathione-disulfide reductase	h[c] + nadh[c] + gssg[c] -> nad[c] + 2 gsh[c]	(ATEG_05186)	OA:Glutathione metabolism	1.8.1.7
r1017	N-acetylglucosamine-6-phosphate deacetylase	h2o[c] + nag6p[c] -> ac[c] + ga6p[c]	(ATEG_00022)	OA:Glutathione metabolism	3.5.1.25
r1018	N-acetylglucosamine-6-phosphate deacetylase	h2o[m] + nag6p[m] -> ac[m] + ga6p[m]	(ATEG_00022)	OA:Glutathione metabolism	3.5.1.25
r1019	5-oxoprolinase (ATP-hydrolysing)	2 h2o[c] + atp[c] + 5opro[c] -> glu[c] + h[c] + pi[c] + adp[c]	(ATEG_00902) or (ATEG_00941) or (ATEG_06855) or (ATEG_01041)	OA:Glutathione metabolism	3.5.2.9
r1020	glutathione oxidase	o2[c] + 2 cys[c] -> h2o2[c] + cyst[c]	(ATEG_00713) or (ATEG_08058) or (ATEG_01577)	OA:Glutathione metabolism	1.8.3.3
r1021	glutamate decarboxylase	h[c] + cyse[c] -> co2[c] + taur[c]	(ATEG_04645) or (ATEG_03397) or (ATEG_01332) or (ATEG_07777) or (ATEG_07895)	OA:Taurine and hypotaurine metabolism	4.1.1.15
r1022	taurine dioxygenase	o2[c] + akg[c] + 6 h[c] + taur[c] -> 3 h2o[c] + co2[c] + succ[c] + h2s[c] + amiace[c]	(ATEG_09106) or (ATEG_04950) or (ATEG_05077) or (ATEG_08248) or (ATEG_09049) or (ATEG_01684) or (ATEG_06331) or (ATEG_02381)	OA:Taurine and hypotaurine metabolism	1.14.11.17
r1023	Glutamate decarboxylase	glu[m] + h[m] -> gaba[m] + co2[m]	(ATEG_04645) or (ATEG_03397) or (ATEG_07777) or (ATEG_07895)	OA:Taurine and hypotaurine metabolism	4.1.1.15	(Fujii et al., 1988)
r1024	Carnitine O-acetyltransferase	c141coa[c] + car[c] <=> coa[c] + c141car[c]	(ATEG_00432) or (ATEG_01209)	OT	2.3.1.7
r1025	Carnitine O-acetyltransferase	car[m] + c141coa[m] <=> coa[m] + c141car[m]	(ATEG_00432) or (ATEG_01209)	OT	2.3.1.7
r1026	Carnitine O-acetyltransferase	c120coa[c] + car[c] <=> coa[c] + c120car[c]	(ATEG_00432) or (ATEG_01209)	OT	2.3.1.7
r1027	Carnitine O-acetyltransferase	c140coa[c] + car[c] <=> coa[c] + c140car[c]	(ATEG_00432) or (ATEG_01209)	OT	2.3.1.7
r1028	Carnitine O-acetyltransferase	c160coa[c] + car[c] <=> coa[c] + c160car[c]	(ATEG_00432) or (ATEG_01209)	OT	2.3.1.7
r1029	Carnitine O-acetyltransferase	c161coa[c] + car[c] <=> coa[c] + c161car[c]	(ATEG_00432) or (ATEG_01209)	OT	2.3.1.7
r1030	Carnitine O-acetyltransferase	c162coa[c] + car[c] <=> coa[c] + c162car[c]	(ATEG_00432) or (ATEG_01209)	OT	2.3.1.7
r1031	Carnitine O-acetyltransferase	c180coa[c] + car[c] <=> coa[c] + c180car[c]	(ATEG_00432) or (ATEG_01209)	OT	2.3.1.7
r1032	Carnitine O-acetyltransferase	c181coa[c] + car[c] <=> coa[c] + c181car[c]	(ATEG_00432) or (ATEG_01209)	OT	2.3.1.7
r1033	Carnitine O-acetyltransferase	c182coa[c] + car[c] <=> coa[c] + c182car[c]	(ATEG_00432) or (ATEG_01209)	OT	2.3.1.7
r1034	Carnitine O-acetyltransferase	c183coa[c] + car[c] <=> coa[c] + c183car[c]	(ATEG_00432) or (ATEG_01209)	OT	2.3.1.7
r1035	Carnitine O-acetyltransferase	c120coa[m] + car[m] <=> coa[m] + c120car[m]	(ATEG_00432) or (ATEG_01209)	OT	2.3.1.7
r1036	Carnitine O-acetyltransferase	c140coa[m] + car[m] <=> coa[m] + c140car[m]	(ATEG_00432) or (ATEG_01209)	OT	2.3.1.7
r1037	Carnitine O-acetyltransferase	c160coa[m] + car[m] <=> coa[m] + c160car[m]	(ATEG_00432) or (ATEG_01209)	OT	2.3.1.7
r1038	Carnitine O-acetyltransferase	car[m] + c161coa[m] <=> coa[m] + c161car[m]	(ATEG_00432) or (ATEG_01209)	OT	2.3.1.7
r1039	Carnitine O-acetyltransferase	car[m] + c162coa[m] <=> coa[m] + c162car[m]	(ATEG_00432) or (ATEG_01209)	OT	2.3.1.7
r1040	Carnitine O-acetyltransferase	c180coa[m] + car[m] <=> coa[m] + c180car[m]	(ATEG_00432) or (ATEG_01209)	OT	2.3.1.7
r1041	Carnitine O-acetyltransferase	car[m] + c181coa[m] <=> coa[m] + c181car[m]	(ATEG_00432) or (ATEG_01209)	OT	2.3.1.7
r1042	Carnitine O-acetyltransferase	car[m] + c182coa[m] <=> coa[m] + c182car[m]	(ATEG_00432) or (ATEG_01209)	OT	2.3.1.7
r1043	Carnitine O-acetyltransferase	car[m] + c183coa[m] <=> coa[m] + c183car[m]	(ATEG_00432) or (ATEG_01209)	OT	2.3.1.7
r1044	Galactosyltransferase	h2o[c] + udpgal[c] + dmipc[c] -> 2 h[c] + udp[c] + gdmipc[c]	(ATEG_05091)	OT	2.4.1.-
r1045	Galactosyltransferase	h2o[c] + udpgal[c] + gdmipc[c] -> 2 h[c] + udp[c] + dgdmipc[c]	(ATEG_05091)	OT	2.4.1.-
r1046	Galactosyltransferase	udpgal[c] + dgdmipc[c] -> udp[c] + tgdmipc[c]	(ATEG_05091)	OT	2.4.1.-
r1047	UDP-glucose glycoprotein glucosyltransferase	h2o[c] + gdpman[c] -> gdp[c] + man[c]	(ATEG_06948)	OT	2.4.1.-
r1048	UDP-glucose glycoprotein glucosyltransferase	gdpman[c] -> gdp[c] + 14mnan[c]	(ATEG_06948)	OT	2.4.1.-
r1049	Phosphatidylinositol N-acetylglucosaminyltransferase	udpnag[c] + pins[c] -> udp[c] + nadgpis[c]	(ATEG_05104)	OT	2.4.1.198
r1050	Mannosyl-oligosaccharide 1,2-alpha-mannosidase	h2o[e] + mannan[e] -> man[e]	(ATEG_00658) or (ATEG_00734) or (ATEG_03282) or (ATEG_00820) or (ATEG_02904) or (ATEG_01650) or (ATEG_06636) or (ATEG_08684) or (ATEG_09890)	OT	3.2.1.113
r1051	cytochrome-c peroxidase	h2o2[m] + 2 h[m] + 2 fero[m] -> 2 h2o[m] + 2 feri[m]	(ATEG_03406) or (ATEG_05303)	OT	1.11.1.5
r1052	dihydrogedin oxidase	dgeod[c] -> geod[c]	(ATEG_08458)	TP:anthraquinone ring cleavage,Geodin synthesis
r1053	salicylate synthetase	ichor[c] -> pyr[c] + sali[c]	(ATEG_04957)	TP:Biosynthesis of siderophore group nonribosomal peptides	4.2.99.21
r1054	lovastatin nonaketide synthase (multi-step reaction)	accoa[c] + sam[c] + 8 malcoa[c] -> 6 h2o[c] + 8 co2[c] + 11 nadp[c] + 9 coa[c] + sah[c] + dhmacl[c]	(ATEG_09961 and lovC)	TP:lovastatin	2.1.1.-;2.3.1.161	(Sutherland et al., 2001)
r1055	Dihydromonacolin L oxidase	o2[c] + dhmacl[c] -> h2o[c] + maclj[c]	(ATEG_09960)	TP:lovastatin		(Sutherland et al., 2001)
r1056	lovastatin diketide synthase	accoa[c] + malcoa[c] -> mbtac[c]	(ATEG_09968)	TP:lovastatin		(Sutherland et al., 2001)
r1057	acyltransferase	maclj[c] + mbtac[c] -> h2o[c] + lovst[c]	(ATEG_09964)	TP:lovastatin		(Sutherland et al., 2001)
r1058	farnesyl diphosphate synthase	ippp[c] + dmpp[c] -> h[c] + ppi[c] + gpp[c]	(ATEG_09210) or (ATEG_06403)	TP:Terpenoid backbone biosynthesis	2.5.1.1:2.5.1.10
r1059	Squalene monooxygenase	o2[c] + h[c] + nadph[c] + sql[c] -> h2o[c] + nadp[c] + s23e[c]	(ATEG_08351) or (ATEG_08650)	TP:Terpenoid backbone biosynthesis	1.14.99.7
r1060	geranyltranstransferase;farnesyl diphosphate synthase	ippp[c] + gpp[c] -> h[c] + ppi[c] + fpp[c]	(ATEG_09210) or (ATEG_06403)	TP:Terpenoid backbone biosynthesis	2.5.1.1:2.5.1.10
r1061	Squalene synthase	nadph[c] + 2 fpp[c] -> h[c] + 2 ppi[c] + nadp[c] + sql[c]	(ATEG_08674)	TP:Terpenoid backbone biosynthesis	2.5.1.21
r1062	Mevalonate kinase	atp[c] + mvl[c] -> h[c] + adp[c] + pmvl[c]	(ATEG_05423)	TP:Terpenoid backbone biosynthesis	2.7.1.36
r1063	hydroxymethylglutaryl-CoA reductase (NADPH)	2 h[c] + 2 nadph[c] + hmgcoa[c] <=> 2 nadp[c] + coa[c] + mvl[c]	(ATEG_02145) or (ATEG_09520) or (ATEG_09965) or (ATEG_03447)	TP:Terpenoid backbone biosynthesis	1.1.1.34
r1064	Phosphomevalonate kinase	atp[c] + h[c] + pmvl[c] -> adp[c] + ppmvl[c]	(ATEG_07639)	TP:Terpenoid backbone biosynthesis	2.7.4.2
r1065	Diphosphomevalonate decarboxylase	atp[c] + ppmvl[c] -> co2[c] + pi[c] + adp[c] + ippp[c]	(ATEG_05498)	TP:Terpenoid backbone biosynthesis	4.1.1.33
r1066	isopentenyl-diphosphate DELTA-isomerase	dmpp[c] <=> ippp[c]	(ATEG_05052)	TP:Terpenoid backbone biosynthesis	5.3.3.2
r1067	Lanosterol synthase	s23e[c] -> lnst[c]	(ATEG_08005) or (ATEG_09767)	TP:Terpenoid backbone biosynthesis	5.4.99.7
r1068	farnesyltranstransferase	fpp[c] + ippp[c] -> h[c] + ppi[c] + ggpp[c]	(ATEG_03568) or (ATEG_06435) or (ATEG_00512)	TP:Terpenoid backbone biosynthesis	2.5.1.29
r1069	hydroxymethylglutaryl-CoA synthase	h[c] + coa[c] + hmgcoa[c] <=> h2o[c] + accoa[c] + aaccoa[c]	(ATEG_04595)	TP:Terpenoid backbone biosynthesis;AA:Valine, leucine and isoleucine degradation;CM:Butanoate metabolism;LM	2.3.3.10
r1070	Aflatoxins biosynthesis;1,3,6,8-tetra hydroxy naphthalene reductase	h[c] + nadph[c] + vera[c] -> nadp[c] + dmst[c]	(ATEG_06232)	XB	1.1.-.-
r1071	Polyketide syntase	o2[c] + accoa[c] + 9 malcoa[c] -> nor[c]	(ATEG_06206)	XB
r1072	Sterigmatocystin biosynthesis lipase/esterase STCI	h2o[c] + vha[c] -> 2 h[c] + ac[c] + vhoh[c]	(ATEG_00914)	XB
r1073	hydroxyquinol 1,2-dioxygenase	o2[c] + btol[c] -> 2 h[c] + 2mac[c]	(ATEG_00629) or (ATEG_07465)	XB	1.13.11.37
r1074	Sterigmatocystin biosynthesis monooxygenase	o2[c] + h[c] + nadph[c] + avn[c] -> h2o[c] + nadp[c] + havn[c]	(ATEG_08875)	XB	1.14.-.-
r1075	O-Methylsterigmatocystin oxidoreductase	2 o2[c] + 2 h[c] + 2 nadph[c] + omst[c] -> h2o[c] + co2[c] + 2 nadp[c] + meth[c] + afb1[c]	(ATEG_02682) or (ATEG_07797) or (ATEG_07254)	XB	1.14.1.-
r1076	O-Methylsterigmatocystin oxidoreductase	o2[c] + 3 h[c] + nadph[c] + omst[c] -> nadp[c] + eth[c] + afg1[c]	(ATEG_02682) or (ATEG_07797) or (ATEG_07254)	XB	1.14.1.-
r1077	O-Methylsterigmatocystin oxidoreductase	o2[c] + 3 h[c] + nadph[c] + dhomst[c] -> h2o[c] + nadp[c] + afb2[c]	(ATEG_02682) or (ATEG_07797) or (ATEG_07254)	XB	1.14.1.-
r1078	O-Methylsterigmatocystin oxidoreductase	o2[c] + 3 h[c] + nadph[c] + dhomst[c] -> h2o[c] + nadp[c] + afg2[c]	(ATEG_02682) or (ATEG_07797) or (ATEG_07254)	XB	1.14.1.-
r1079	Aflatoxins biosynthesis;1,3,6,8-tetra hydroxy naphthalene reductase	h[c] + nadph[c] + verb[c] -> h2o[c] + nadp[c] + dhdmst[c]	(ATEG_06232)	XB	1.1.-.-
r1080	Norsolorinic acid reductase	2 h[c] + nadph[c] + nor[c] -> nadp[c] + avn[c]	(ATEG_00997) or (ATEG_01451) or (ATEG_09069)	XB	1.1.1.-
r1081	Demethylsterigmatocystin 6-O-methyltransferase	sam[c] + dmst[c] -> h[c] + sah[c] + st[c]	(ATEG_02788) or (ATEG_08460)	XB	2.1.1.109
r1082	Demethylsterigmatocystin 6-O-methyltransferase	sam[c] + dhdmst[c] -> h[c] + sah[c] + dhst[c]	(ATEG_02788) or (ATEG_08460)	XB	2.1.1.109
r1083	Nitrilase	2 h2o[c] + bn[c] <=> nh3[c] + ba[c]	(ATEG_07252) or (ATEG_03360)	XB:Aminobenzoate degradation	3.5.5.1
r1084	benzoylformate decarboxylase	h[c] + bfor[c] -> co2[c] + bal[c]	(ATEG_01344) or (ATEG_08250)	XB:Aminobenzoate degradation	4.1.1.7
r1085	Carboxy-cis,cis-muconate cyclase	coac[e] <=> cmuc[e]	(ATEG_05005)	XB:Benzoate degradation	5.5.1.5
r1086	catechol 1,2-dioxygenase	o2[c] + ccl[c] -> muc[c]	(ATEG_09602)	XB:Benzoate degradation	1.13.11.1
r1087	3-hydroxybenzoate 4-monooxygenase	o2[c] + h[c] + nadph[c] + 3hba[c] -> h2o[c] + nadp[c] + pcace[c]	(ATEG_03775) or (ATEG_05259) or (ATEG_07873) or (ATEG_07876) or (ATEG_07877)	XB:Benzoate degradation	1.14.13.23
r1088	maleylacetate reductase	h[c] + nadph[c] + 2mac[c] -> nadp[c] + 3oa[c]	(ATEG_03722)	XB:Benzoate degradation	1.3.1.32
r1089	acetyl-CoA C-acyltransferase	coa[m] + 3oacoa[m] <=> accoa[m] + succoa[m]	(ATEG_00456) or (ATEG_01444) or (ATEG_03795) or (ATEG_03980) or (ATEG_04288)	XB:Benzoate degradation	2.3.1.16
r1090	3-oxoadipate CoA-transferase	succoa[m] + 3oa[m] <=> succ[m] + 3oacoa[m]	(ATEG_02859) or (ATEG_03296) or (ATEG_03794)	XB:Benzoate degradation	2.8.3.6
r1091	2,3-dihydroxybenzoate decarboxylase	h[c] + dhba[c] -> co2[c] + ccl[c]	(ATEG_06350)	XB:Benzoate degradation	4.1.1.46
r1092	benzoate 4-monooxygenase	o2[m] + h[m] + nadph[m] + ba[m] -> h2o[m] + nadp[m] + 4hba[m]	(ATEG_03775) or (ATEG_05259) or (ATEG_07873) or (ATEG_07876) or (ATEG_07877)	XB:Benzoate degradation:Aminobenzoate degradation	1.14.13.12
r1093	salicylate hydroxylase	h2o[c] + co2[c] + nadp[c] + ccl[c] <=> o2[c] + 2 h[c] + nadph[c] + sali[c]	(ATEG_08614) or (ATEG_10311) or (ATEG_04820) or (ATEG_09120) or (ATEG_06076) or (ATEG_06677) or (ATEG_09086) or (ATEG_05726) or (ATEG_03443) or (ATEG_08666) or (ATEG_05898) or (ATEG_09059) or (ATEG_09620) or (ATEG_10085) or (ATEG_05966) or (ATEG_08898) or (ATEG_00874) or (ATEG_06711) or (ATEG_06323) or (ATEG_06272)	XB:Polycyclic aromatic hydrocarbon degradation	1.14.13.1
r1094	2-hydroxy-phenylacetate hydroxylase	o2[m] + h[m] + nadh[m] + hphea[m] -> h2o[m] + nad[m] + homogen[m]	(ATEG_09973) or (ATEG_09785)	XB:Styrene degradation	1.14.13.-
Note:
ER: Exchange reactions; OT: Uncategorized reactions; TP: Terpenoids and polyketides metabolism; OA: Other amino acids metabolism; XB: Xenobiotics biodegradation and metabolism; EM: Energy metabolism; NM: Nucleotide metabolism; CV: Cofactors and vitamins metabolism; MT: Membrane transport reactions; CM: Carbohydrate metabolism; AA: Amino acid metabolism; LM: Lipid metabolism.
References:
Mitchell, D. B., Vogel, K., Weimann, B. J., Pasamontes, L. & van Loon, A. P. (1997). The phytase subfamily of histidine acid phosphatases: isolation of genes for two novel phytases from the fungi Aspergillus terreus and Myceliophthora thermophila. Microbiology, 143 ( Pt 1), 245-252.
Kumar, A. K. & Goswami, P. (2006). Functional characterization of alcohol oxidases from Aspergillus terreus MTCC 6324. Applied Microbiology and Biotechnology, 72, 906-911.
Kumar, A. K., Vatsyayan, P. & Goswami, P. (2010). Production of Lipid and Fatty Acids during Growth of Aspergillus terreus on Hydrocarbon Substrates. Applied Biochemistry and Biotechnology, 160, 1293-1300.
Elshafei, A. M. & Abdel-Fatah, O. M. (1991). Nonphosphorolytic pathway for D-galactonate catabolism in Aspergillus terreus. Enzyme and Microbial Technology, 13, 930-934.
Fujii, I., Ebizuka, Y. & Sankawa, U. (1988). A novel anthraquinone ring cleavage enzyme from Aspergillus terreus. Journal of Biochemistry, 103, 878-883.
Sutherland, A., Auclair, K. & Vederas, J. C. (2001). Recent advances in the biosynthetic studies of lovastatin. Current Opinion In Drug Discovery & Development, 4, 229-236.
Workman, W. E. & Day, D. F. (1982). Purification and Properties of beta-Glucosidase from Aspergillus terreus. Applied and Environmental Microbiology, 44, 1289-1295.
AsperCyc: http://130.88.248.2:1555/
KEGG: http://www.genome.jp/
MetaCyc: http://www.metacyc.org
Uniprot: http://www.uniprot.org/

## Sheet: metabolites
Metabolite name	Metabolite description	Metabolite neutral formula	Metabolite charged formula	Metabolite charge	Metabolite KEGGID	Metabolite PubChemID
13glucan[c]	1,3-beta-D-glucan	C6H10O5	C6H10O5	0	C00965	4216
13glucan[e]	1,3-beta-D-glucan	C6H10O5	C6H10O5	0	C00965	4216
13pdg[c]	3-phospho-D-glyceroyl phosphate	C3H8O10P2	C3H4O10P2	-4	C00236	3535
14glucan[c]	1,4-alpha-D-glucan	C6H10O5	C6H10O5	0	C00718	3984
14mnan[c]	1,4-beta-D-mannan	C6H10O5	C6H10O5	0	C02492	554
1dgali[e]	Galactinol	C12H22O11	C12H22O11	0	C01235	4456
23gcar[c]	2-Dehydro-3-deoxy-D-glucarate	C6H8O7	C6H6O7	-2	C03921
25dhba[c]	2,5-Dihydroxybenzoate	C7H6O4	C7H5O4	-1	C00628
2d3dgalt[c]	2-dehydro-3-deoxy-D-galactonate	C6H10O6	C6H9O6	-1	C01216	4438
2ddglcn[c]	2-Deoxy-D-gluconate	C6H12O6	C6H12O6	0	C02782	5733
2mac[c]	2-maleylacetate	C6H6O5	C6H4O5	-2	C02222	5287
2maco[m]	cis-2-Methylaconitate;(Z)-but-2-ene-1,2,3-tricarboxylate	C7H8O6	C7H5O6	-3	C04225	6896
2mcit[m]	2-methylcitrate	C7H10O7	C7H7O7	-3	C02225	529
2micit[c]	(2S,3R)-3-hydroxybutane-1,2,3-tricarboxylate	C7H10O7	C7H7O7	-3	C04593	7191
2micit[m]	(2S,3R)-3-hydroxybutane-1,2,3-tricarboxylate	C7H10O7	C7H7O7	-3	C04593	7191
2pg[c]	2-phospho-D-glycerate	C3H7O7P	C3H4O7P	-3	C00631	394
3d2ddglcn[c]	3-Dehydro-2-deoxy-D-gluconate	C6H10O6	C6H10O6	0	C03926	6654
3ddah7p[c]	2-dehydro-3-deoxy-D-arabino-heptonate 7-phosphate	C7H13O10P	C7H10O10P	-3	C04691	7271
3hba[c]	3-hydroxybenzoate	C7H6O3	C7H5O3	-1	C00587
3hpyr[c]	3-hydroxypyruvate	C3H4O4	C3H3O4	-1	C00168	3468
3oa[c]	3-oxoadipate	C6H8O5	C6H6O5	-2	C00846	413
3oa[m]	3-oxoadipate	C6H8O5	C6H6O5	-2	C00846	413
3oacoa[m]	3-oxoadipyl-CoA	C27H42N7O20P3S	C27H37N7O20P3S	-5	C02232	5296
3pg[c]	3-phospho-D-glycerate	C3H7O7P	C3H4O7P	-3	C00197	3497
3pser[c]	O-phospho-L-serine	C3H8NO6P	C3H6NO6P	-2	C01005	4251
3psme[c]	5-O-(1-carboxyvinyl)-3-phosphoshikimate	C10H13O10P	C10H9O10P	-4	C01269	4488
3sulala[c]	3-sulfino-L-alanine	C3H7NO4S	C3H6NO4S	-1	C00606	3881
3sulpyr[c]	3-Sulfinopyruvate	C3H4O5S	C3H2O5S	-2	C05527	787
4hba[m]	4-Hydroxybenzoate	C7H6O3	C7H6O3	0	C00156
4hppyr[c]	4-Hydroxyphenylpyruvate	C9H8O4	C9H7O4	-1	C01179	446
4mop[c]	4-methyl-2-oxopentanoate	C6H10O3	C6H10O3	0	C00233
4mop[m]	4-methyl-2-oxopentanoate	C6H10O3	C6H10O3	0	C00233
54gcar[c]	5-Dehydro-4-deoxy-D-glucarate	C6H8O7	C6H6O7	-2	C00679
5opro[c]	5-oxo-L-proline	C5H7NO3	C5H6NO3	-1	C01879	4992
a6rp[c]	5-amino-6-(D-ribitylamino)uracil	C9H16N4O6	C9H16N4O6	0	C04732	733
a6rp5p[c]	5-amino-6-(5-phosphoribosylamino)uracil	C9H15N4O9P	C9H13N4O9P	-2	C01268	4487
a6rp5p2[c]	5-amino-6-(5'-phosphoribitylamino)uracil	C9H17N4O9P	C9H15N4O9P	-2	C04454	781
aacacp[c]	acetoacetyl-[acp]	C4H5O2SR	C4H5O2SR	0	C05744	839
aaccoa[c]	acetoacetyl-CoA	C25H40N7O18P3S	C25H36N7O18P3S	-4	C00332	3626
aaccoa[m]	acetoacetyl-CoA	C25H40N7O18P3S	C25H36N7O18P3S	-4	C00332	3626
aaproa[c]	3-Acetamidopropanal	C5H9NO2	C5H9NO2	0	C18170	9624386
abee[c]	4-aminobenzoate	C7H7NO2	C7H6NO2	-1	C00568	3847
abut[m]	(S)-2-Aceto-2-hydroxybutanoate	C6H10O4	C6H9O4	-1	C06006	8279
ac[c]	acetate	C2H4O2	C2H3O2	-1	C00033	3335
ac[e]	acetate	C2H4O2	C2H3O2	-1	C00033	3335
ac[m]	acetate	C2H4O2	C2H3O2	-1	C00033	3335
acacp[c]	acetyl-[acp]	C2H3OSR	C2H3OSR	0	C03939	6663
acact[c]	acetoacetate	C4H6O3	C4H5O3	-1	C00164	3464
acact[m]	acetoacetate	C4H6O3	C4H5O3	-1	C00164	3464
acal[c]	acetaldehyde	C2H4O	C2H4O	0	C00084	3384
acal[m]	acetaldehyde	C2H4O	C2H4O	0	C00084	3384
accln[e]	Acetylcholine	C7H16NO2	C7H16NO2	0	C01996
accoa[c]	acetyl-CoA	C23H38N7O17P3S	C23H34N7O17P3S	-4	C00024	3326
accoa[m]	acetyl-CoA	C23H38N7O17P3S	C23H34N7O17P3S	-4	C00024	3326
aclac[m]	2-acetolactate	C5H8O4	C5H7O4	-1	C00900 C06010	4156 8282
acnl[c]	indole-3-acetonitrile	C10H8N2	C10H8N2	0	C02938	5857
aco[c]	cis-aconitate	C6H6O6	C6H3O6	-3	C00417
aco[m]	cis-aconitate	C6H6O6	C6H3O6	-3	C00417
acp[c]	acyl-carrier protein	C11H21N2O7PRS	HSR	-1	C00229	3528
acpi[c]	Acetyl phosphate	C2H5O5P	C2H3O5P	-2	C00227
acylacp[c]	acyl-[acp]	C3H5OSR2	C3H4OSR2	-1	C00173	3473
acylacpp[c]	acylacpp[c]	C3H5OSR2	C3H4OSR2	0
acylcoa[c]	Acyl-CoA	C22H35N7O17P3SR	C22H31N7O17P3SR	-4	C00040	3342
acylcoa[m]	Acyl-CoA	C22H35N7O17P3SR	C22H31N7O17P3SR	-4	C00040	3342
acyldcoa[m]	trans-2,3-Dehydroacyl-CoA	C24H37N7O17P3SR	C24H33N7O17P3SR	-4	C00658
ad[c]	adenine	C5H5N5	C5H5N5	0	C00147	3447
ad[e]	adenine	C5H5N5	C5H5N5	0	C00147	3447
adg6p[c]	alpha-D-glucose 6-phosphate	C6H13O9P	C6H11O9P	-2	C00668	3937
adglc[c]	alpha-D-glucose	C6H12O6	C6H12O6	0	C00267	3565
adglc[e]	alpha-D-glucose	C6H12O6	C6H12O6	0	C00267	3565
adn[c]	adenosine	C10H13N5O4	C10H13N5O4	0	C00212	3512
adp[c]	Adenosine 5'-diphosphate	C10H15N5O10P2	C10H13N5O10P2	-2	C00008	331
adp[m]	Adenosine 5'-diphosphate	C10H15N5O10P2	C10H13N5O10P2	-2	C00008	331
adprib[c]	5-deoxy-D-ribofuranos-5-yl-ADP	C15H23N5O14P2	C15H21N5O14P2	-2	C00301	3595
afb1[c]	aflatoxin B1	C17H12O6	C17H12O6	0	C06800	919
afb2[c]	aflatoxin B2	C17H14O6	C17H14O6	0	C16753	9623277
afg1[c]	aflatoxin G1	C17H12O7	C17H12O7	0	C16755	9623279
afg2[c]	aflatoxin G2	C17H14O7	C17H14O7	0	C16754	9623278
agl3p[c]	1-acyl-sn-glycerol 3-phosphate	C4H8O7PR	C4H6O7PR	-2	C00681	395
agmt[c]	agmatine	C5H14N4	C5H16N4	2	C00179	3479
ahhmd[c]	(2-amino-4-hydroxy-7,8-dihydropteridin-6-yl)methyl trihydrogen diphosphate	C7H11N5O8P2	C7H9N5O8P2	-2	C04807	7369
ahhmp[c]	2-amino-6-(hydroxymethyl)-7,8-dihydropteridin-4-ol	C7H9N5O2	C7H9N5O2	0	C01300	4518
ahmpp[c]	4-amino-2-methyl-5-diphosphomethylpyrimidine	C6H11N3O7P2	C6H9N3O7P2	-2	C04752	7322
ahtd[c]	7,8-dihydroneopterin 3'-triphosphate	C9H16N5O13P3	C9H13N5O13P3	-3	C04895	7446
ahtd[m]	7,8-dihydroneopterin 3'-triphosphate	C9H16N5O13P3	C9H13N5O13P3	-3	C04895	7446
aicar[c]	5-amino-1-(5-phospho-D-ribosyl)imidazole-4-carboxamide	C9H15N4O8P	C9H13N4O8P	-2	C04677	7258
air[c]	5-amino-1-(5-phospho-D-ribosyl)imidazole	C8H14N3O7P	C8H13N3O7P	-1	C03373	628
aka[c]	2-oxoadipate	C6H8O5	C6H6O5	-2	C00322	3616
aka[m]	2-oxoadipate	C6H8O5	C6H6O5	-2	C00322	3616
akg[c]	2-oxoglutarate	C5H6O5	C5H4O5	-2	C00026	3328
akg[e]	2-oxoglutarate	C5H6O5	C5H4O5	-2	C00026	3328
akg[m]	2-oxoglutarate	C5H6O5	C5H4O5	-2	C00026	3328
akp[c]	2-dehydropantoate	C6H10O4	C6H9O4	-1	C00966	4217
akp[m]	2-dehydropantoate	C6H10O4	C6H9O4	-1	C00966	4217
ala[c]	L-alanine	C3H7NO2	C3H7NO2	0	C00041 C01401	3343
ala[e]	L-alanine	C3H7NO2	C3H7NO2	0	C00041 C01401	3343
ala[m]	L-alanine	C3H7NO2	C3H7NO2	0	C00041 C01401	3343
alagly[c]	L-gamma-glutamyl-L-alanine	C8H14N2O5	C8H13N2O5	-1
am6sa[c]	2-aminomuconic 6-semialdehyde	C6H7NO3	C6H7NO3	0	C03824	3
ama[c]	L-2-aminoadipate	C6H11NO4	C6H10NO4	-1	C00956	427
ama[m]	L-2-aminoadipate	C6H11NO4	C6H10NO4	-1	C00956	427
amac[c]	aminoacetone	C3H7NO	C3H8NO	1	C01888	51
amac[m]	aminoacetone	C3H7NO	C3H8NO	1	C01888	51
amasa[m]	L-2-aminoadipate 6-semialdehyde	C6H11NO3	C6H11NO3	0	C04076	6771
amiace[c]	aminoacetaldehyde	C2H5NO	C2H6NO	1	C06735	8957
amievul[c]	5-aminolevulinate	C5H9NO3	C5H9NO3	0	C00430	3719
amievul[m]	5-aminolevulinate	C5H9NO3	C5H9NO3	0	C00430	3719
amp[c]	Adenosine 5'-monophosphate	C10H14N5O7P	C10H12N5O7P	-2	C00020	3322
amp[e]	Adenosine 5'-monophosphate	C10H14N5O7P	C10H12N5O7P	-2	C00020	3322
amp[m]	Adenosine 5'-monophosphate	C10H14N5O7P	C10H12N5O7P	-2	C00020	3322
an[c]	anthranilate	C7H7NO2	C7H6NO2	-1	C00108	348
aobut[c]	L-2-amino-3-oxobutanoate	C4H7NO3	C4H7NO3	0	C03508	6318
aobut[m]	L-2-amino-3-oxobutanoate	C4H7NO3	C4H7NO3	0	C03508	6318
aol[c]	D-arabinitol	C5H12O5	C5H12O5	0	C01904	513
aol[e]	D-arabinitol	C5H12O5	C5H12O5	0	C01904	513
aona[c]	8-amino-7-oxononanoate	C9H17NO3	C9H17NO3	0	C01092	4327
aona[m]	8-amino-7-oxononanoate	C9H17NO3	C9H17NO3	0	C01092	4327
apebu[c]	4-(2-Aminophenyl)-2,4-dioxobutanoate	C10H9NO4	C10H8NO4	-1	C01252	4472
apoce[m]	apocytochrome C	C8H12N4O4S2R4	C8H12N4O4S2R4	0	C02248	5311
aproa[c]	3-aminopropanal	C3H7NO	C3H8NO	1	C05665	7975
aps[c]	5'-adenylyl sulfate	C10H14N5O10PS	C10H12N5O10PS	-2	C00224	3524
arab[c]	D-arabinose	C5H10O5	C5H10O5	0	C00216	3516
arab[e]	D-arabinose	C5H10O5	C5H10O5	0	C00216	3516
arabin[e]	alpha-L-arabinan	C15H24O12	C15H24O12	0	C02474	5489
arg[c]	L-arginine	C6H14N4O2	C6H15N4O2	1	C00062	3362
arg[e]	L-arginine	C6H14N4O2	C6H15N4O2	1	C00062	3362
arg[m]	L-arginine	C6H14N4O2	C6H15N4O2	1	C00062	3362
argsucc[c]	N-(L-arginino)succinate	C10H18N4O6	C10H17N4O6	-1	C03406	6235
asn[c]	L-asparagine	C4H8N2O3	C4H8N2O3	0	C00152	3452
asn[e]	L-asparagine	C4H8N2O3	C4H8N2O3	0	C00152	3452
asp[c]	L-aspartate	C4H7NO4	C4H6NO4	-1	C00049	3351
asp[e]	L-aspartate	C4H7NO4	C4H6NO4	-1	C00049	3351
asp[m]	L-aspartate	C4H7NO4	C4H6NO4	-1	C00049	3351
aspermd[c]	N1-acetylspermidine	C9H21N3O	C9H23N3O	2	C00612	3886
aspsa[c]	L-aspartate 4-semialdehyde	C4H7NO3	C4H7NO3	0	C00441	373
asuc[c]	N6-(1,2-dicarboxyethyl)-AMP	C14H18N5O11P	C14H14N5O11P	-4	C03794	6543
at3p2[c]	acylglycerone phosphates	C4H6O7PR	C4H4O7PR	-2	C03372	627
atp[c]	Adenosine 5'-triphosphate	C10H16N5O13P3	C10H13N5O13P3	-3	C00002	334
atp[m]	Adenosine 5'-triphosphate	C10H16N5O13P3	C10H13N5O13P3	-3	C00002	334
att[c]	allantoate	C4H8N4O4	C4H7N4O4	-1	C00499	3782
aura[c]	5-amino-6-(D-ribitylamino)uracil	C9H16N4O6	C9H16N4O6	0	C04732	733
avn[c]	averantin	C20H20O7	C20H20O7	0		2522729
ba[c]	benzoate	C7H6O2	C7H5O2	-1	C00180	348
ba[m]	benzoate	C7H6O2	C7H5O2	-1	C00180
bal[c]	benzaldehyde	C7H6O	C7H6O	0	C00261	3559
bala[c]	beta-alanine	C3H7NO2	C3H7NO2	0	C00099	3399
bala[m]	beta-alanine	C3H7NO2	C3H7NO2	0	C00099	3399
bamn[c]	Benzoylamine	C7H9N	C7H10N	1	C15562	17396554
bamn[e]	Benzoylamine	C7H9N	C7H10N	1	C15562	17396554
basp[c]	4-phospho-L-aspartate	C4H8NO7P	C4H6NO7P	-2	C03082	598
bccp[c]	holo-[carboxylase]	C17H27N5O4SR2	C17H27N5O4SR2	0	C06250	8489
bdfru[c]	beta-D-Fructose	C6H12O6	C6H12O6	0	C02336	5386
bdfru[e]	beta-D-Fructose	C6H12O6	C6H12O6	0	C02336	5386
bdg6p[c]	beta-D-glucose 6-phosphate	C6H13O9P	C6H11O9P	-2	C01172	4399
bdglc[c]	beta-D-glucose	C6H12O6	C6H12O6	0	C00221	3521
bdglc[e]	beta-D-glucose	C6H12O6	C6H12O6	0	C00221	3521
bet[c]	betaine	C5H11NO2	C5H11NO2	0	C00719	3985
bet[m]	betaine	C5H11NO2	C5H11NO2	0	C00719	3985
betald[c]	betaine aldehyde	C5H11NO	C5H12NO	1	C00576	3855
betald[e]	betaine aldehyde	C5H11NO	C5H12NO	1	C00576	3855
bfor[c]	phenylglyoxylate	C8H6O3	C8H5O3	-1	C02137	5216
bgal[c]	beta-D-galactose	C6H12O6	C6H12O6	0	C00962	4213
bgal[e]	beta-D-galactose	C6H12O6	C6H12O6	0	C00962	4213
blaras[c]	beta-L-Arabinoside	C5H9O5R	C5H9O5R	0	C02761	5717
blaras[e]	beta-L-Arabinoside	C5H9O5R	C5H9O5R	0	C02761	5717
bn[c]	benzonitrile	C7H5N	C7H5N	0	C09814	122
bn[e]	benzonitrile	C7H5N	C7H5N	0	C09814	122
bt[c]	biotin;Vitamin H	C10H16N2O3S	C10H15N2O3S	-1	C00120	342
bt[e]	biotin;Vitamin H	C10H16N2O3S	C10H15N2O3S	-1	C00120	342
bt[m]	biotin;Vitamin H	C10H16N2O3S	C10H15N2O3S	-1	C00120	342
btamp[c]	Biotinyl-5'-AMP	C20H28N7O9PS	C20H27N7O9PS	-1	C05921
btol[c]	benzene-1,2,4-triol	C6H6O3	C6H6O3	0	C02814	5764
c100[c]	decanoate	C10H20O2	C10H19O2	-1	C01571	4728
c100acp[c]	decanoyl-[acp]	C10H19OSR	C10H19OSR	0	C05755	85
c100coa[c]	decanoyl-CoA	C31H54N7O17P3S	C31H50N7O17P3S	-4	C05274	7661
c100coa[m]	decanoyl-CoA	C31H54N7O17P3S	C31H50N7O17P3S	-4	C05274	7661
c10dacp[c]	trans-dec-2-enoyl-[acp]	C10H17OSR	C10H17OSR	0	C05754	849
c10dcoa[m]	trans-dec-2-enoyl-CoA	C31H52N7O17P3S	C31H48N7O17P3S	-4	C05275	7662
c10hacp[c]	3-hydroxydecanoyl-[acp]	C10H19O2SR	C10H19O2SR	0	C04619	729
c10hcoa[m]	3-hydroxydecanoyl-CoA	C31H54N7O18P3S	C31H50N7O18P3S	-4	C05264	7651
c10oacp[c]	3-oxodecanoyl-[acp]	C10H17O2SR	C10H17O2SR	0	C05753	848
c10ocoa[m]	3-oxodecanoyl-CoA	C31H52N7O18P3S	C31H48N7O18P3S	-4	C05265	7652
c120[c]	laurate	C12H24O2	C12H23O2	-1	C02679	5649
c120[e]	laurate	C12H24O2	C12H23O2	-1	C02679	5649
c120acp[c]	lauroyl-[acp]	C12H23OSR	C12H23OSR	0	C05223	762
c120car[c]	dodecanoyl-carnitine	C19H37NO4	C19H37NO4	0		168381
c120car[m]	dodecanoyl-carnitine	C19H37NO4	C19H37NO4	0		168381
c120coa[c]	lauroyl-CoA	C33H58N7O17P3S	C33H54N7O17P3S	-4	C01832	4951
c120coa[m]	lauroyl-CoA	C33H58N7O17P3S	C33H54N7O17P3S	-4	C01832	4951
c12dacp[c]	trans-dodec-2-enoyl-[acp]	C12H21OSR	C12H21OSR	0	C05758	853
c12dcoa[m]	trans-dodec-2-enoyl-CoA	C33H56N7O17P3S	C33H52N7O17P3S	-4	C03221	694
c12hacp[c]	3-hydroxylauroyl-[acp]	C12H23O2SR	C12H23O2SR	0	C05757	852
c12hcoa[m]	3-hydroxylauroyl-CoA	C33H58N7O18P3S	C33H54N7O18P3S	-4	C05262	7649
c12oacp[c]	3-oxolauroyl-[acp]	C12H21O2SR	C12H21O2SR	0	C05756	851
c12ocoa[m]	3-oxolauroyl-CoA	C33H56N7O18P3S	C33H52N7O18P3S	-4	C05263	765
c140[c]	myristate	C14H28O2	C14H27O2	-1	C06424	8659
c140[e]	myristate	C14H28O2	C14H27O2	-1	C06424	8659
c140acp[c]	myristoyl-[acp]	C14H27OSR	C14H27OSR	0	C05761	856
c140car[c]	myristoyl-carnitine	C21H41NO4	C21H41NO4	0		6426854
c140car[m]	myristoyl-carnitine	C21H41NO4	C21H41NO4	0		6426854
c140coa[c]	myristoyl-CoA	C35H62N7O17P3S	C35H58N7O17P3S	-4	C02593	5585
c140coa[m]	myristoyl-CoA	C35H62N7O17P3S	C35H58N7O17P3S	-4	C02593	5585
c141[c]	tetradecenoate	C14H26O2	C14H25O2	-1
c141acp[c]	tetradecenoyl-[acp]	C14H25OSR	C14H25OSR	0
c141car[c]	c141-carnitine	R	R	0
c141car[m]	c141-carnitine	R	R	0
c141coa[c]	tetradecenoyl-CoA	C35H56N7O17P3S	C35H56N7O17P3S	0	C06736	8958
c141coa[m]	tetradecenoyl-CoA	C35H56N7O17P3S	C35H56N7O17P3S	0	C06736	8958
c14dacp[c]	trans-tetradec-2-enoyl-[acp]	C14H25OSR	C14H25OSR	0	C05760	855
c14dcoa[m]	trans-tetradec-2-enoyl-CoA	C35H60N7O17P3S	C35H56N7O17P3S	-4	C05273	766
c14hacp[c]	3-hydroxymyristoyl-[acp]	C14H27O2SR	C14H27O2SR	0	C04688	7269
c14hcoa[m]	3-hydroxymyristoyl-CoA	C35H62N7O18P3S	C35H58N7O18P3S	-4	C05260	85291981
c14oacp[c]	3-oxomyristoyl-[acp]	C14H25O2SR	C14H25O2SR	0	C05759	854
c14ocoa[m]	3-oxomyristoyl-CoA	C35H60N7O18P3S	C35H56N7O18P3S	-4	C05261	14717685
c160[c]	palmitate	C16H32O2	C16H31O2	-1	C00249	3548
c160[e]	palmitate	C16H32O2	C16H31O2	-1	C00249	3548
c160acp[c]	palmitoyl-[acp]	C16H31OSR	C16H31OSR	0	C05764	859
c160car[c]	palmitoyl-carnitine	C23H45NO4	C23H45NO4	0
c160car[m]	palmitoyl-carnitine	C23H45NO4	C23H45NO4	0
c160coa[c]	palmitoyl-CoA	C37H66N7O17P3S	C37H62N7O17P3S	-4	C00154	3454
c160coa[m]	palmitoyl-CoA	C37H66N7O17P3S	C37H62N7O17P3S	-4	C00154	3454
c161[c]	hexadecenoate;Palmitoleic acid	C16H30O2	C16H29O2	-1	C08362	1558
c161[e]	hexadecenoate;Palmitoleic acid	C16H30O2	C16H29O2	-1	C08362	1558
c161acp[c]	hexadecenoyl-[acp]	C16H29OSR	C16H29OSR	0	C16520	519849
c161car[c]	hexadecenoyl-carnitine	C23H43NO4	C23H43NO4	0
c161car[m]	hexadecenoyl-carnitine	C23H45NO4	C23H43NO4	0
c161coa[c]	hexadecenoyl-CoA	C37H64N7O17P3S	C37H60N7O17P3S	-4
c161coa[m]	hexadecenoyl-CoA	C37H64N7O17P3S	C37H60N7O17P3S	-4
c162[c]	hexadecadienoate	C16H28O2	C16H27O2	-1
c162acp[c]	hexadecadienoyl-[acp]	C16H27OSR	C16H27OSR	0
c162car[c]	hexadecadienoyl-carnitine	C23H41NO4	C23H41NO4	0
c162car[m]	hexadecadienoyl-carnitine	C23H41NO4	C23H41NO4	0
c162coa[c]	hexadecadienoyl-CoA	C37H62N7O17P3S	C37H58N7O17P3S	-4
c162coa[m]	hexadecadienoyl-CoA	C37H62N7O17P3S	C37H58N7O17P3S	-4
c16a[c]	hexadecanal	C16H32O	C16H32O	0	C00517	38
c16dacp[c]	trans-hexadec-2-enoyl-[acp]	C16H29OSR	C16H29OSR	0	C05763	858
c16dcoa[m]	trans-hexadec-2-enoyl-CoA	C37H64N7O17P3S	C37H60N7O17P3S	-4	C05272	7659
c16e[c]	Hexadecenal	C16H30O	C16H30O	0	C06123	838
c16hacp[c]	3-hydroxypalmitoyl-[acp]	C16H31O2SR	C16H31O2SR	0
c16hcoa[m]	3-hydroxypalmitoyl-CoA	C37H66N7O18P3S	C37H62N7O18P3S	-4	C05258
c16oacp[c]	3-Oxohexadecanoyl-[acp]	C16H29O2SR	C16H29O2SR	0	C05762	857
c16ocoa[m]	3-oxopalmitoyl-CoA	C37H64N7O18P3S	C37H60N7O18P3S	-4	C05259	7646
c180[c]	stearate	C18H36O2	C18H35O2	-1	C01530	4692
c180[e]	stearate	C18H36O2	C18H35O2	-1	C01530	4692
c180acp[c]	stearoyl-[acp]	C18H35OSR	C18H35OSR	0	C04088	678
c180car[c]	stearoyl-carnitine	C25H49NO4	C25H49NO4	0
c180car[m]	stearoyl-carnitine	C25H49NO4	C25H49NO4	0
c180coa[c]	stearoyl-CoA	C39H70N7O17P3S	C39H66N7O17P3S	-4	C00412	372
c180coa[m]	stearoyl-CoA	C39H70N7O17P3S	C39H66N7O17P3S	-4	C00412	372
c181[c]	oleic acid	C18H34O2	C18H33O2	-1	C00712	3978
c181[e]	oleic acid	C18H34O2	C18H33O2	-1	C00712	3978
c181acp[c]	oleoyl-[acp]	C18H33OSR	C18H33OSR	0	C01203	4427
c181car[c]	octadecenoyl-carnitine	C25H48NO4	C25H47NO4	0
c181car[m]	octadecenoyl-carnitine	C25H48NO4	C25H47NO4	0
c181coa[c]	oleoyl-CoA	C39H68N7O17P3S	C39H64N7O17P3S	-4	C00510	3793
c181coa[m]	oleoyl-CoA	C39H68N7O17P3S	C39H64N7O17P3S	-4	C00510	3793
c182[c]	linoleate	C18H32O2	C18H31O2	-1	C01595	475
c182[e]	linoleate	C18H32O2	C18H31O2	-1	C01595	475
c182acp[c]	linolenoyl-[acp]	C18H33OSR	C18H31OSR	0	C16161	4725471
c182car[c]	octadecadienoyl-carnitine	C25H45NO4	C25H45NO4	0
c182car[m]	octadecadienoyl-carnitine	C25H45NO4	C25H45NO4	0
c182coa[c]	linoleoyl-CoA	C39H66N7O17P3S	C39H62N7O17P3S	-4	C02050	5139
c182coa[m]	linoleoyl-CoA	C39H66N7O17P3S	C39H62N7O17P3S	-4	C02050	5139
c183[c]	octadecatrienoic acid	C18H30O2	C18H29O2	-1
c183[e]	octadecatrienoic acid	C18H30O2	C18H29O2	-1
c183acp[c]	octadecatrienoyl-[acp]	C18H33OSR	C18H29OSR	0
c183car[c]	octadecatrienoyl-carnitine	C25H43NO4	C25H43NO4	0
c183car[m]	octadecatrienoyl-carnitine	C25H43NO4	C25H43NO4	0
c183coa[c]	octadecatrienoyl-CoA	C39H64N7O17P3S	C39H60N7O17P3S	-4
c183coa[m]	octadecatrienoyl-CoA	C39H64N7O17P3S	C39H60N7O17P3S	-4
c18dacp[c]	trans-octadec-2-enoyl-[acp]	C18H33OSR	C18H33OSR	0	C16221	4725529
c18dcoa[m]	trans-octadec-2-enoyl-CoA	C39H68N7O17P3S	C39H64N7O17P3S	-4	C16218	4725526
c18hacp[c]	3-hydroxystearoyl-[acp]	C18H35O2SR	C18H35O2SR	0	C16220	4725528
c18hcoa[m]	3-hydroxystearoyl-CoA	C39H70N7O18P3S	C39H66N7O18P3S	-4	C16217	4725525
c18oacp[c]	3-oxostearoyl-[acp]	C18H33O2SR	C18H33O2SR	0	C16219	4725527
c18ocoa[m]	3-oxostearoyl-CoA	C39H68N7O18P3S	C39H64N7O18P3S	-4	C16216	4725524
c40[c]	butyrate	C4H8O2	C4H7O2	-1	C00246	3545
c40acp[c]	butyryl-[acp]	C4H7OSR	C4H7OSR	0	C05745	84
c40coa[c]	butyryl-CoA	C25H42N7O17P3S	C25H38N7O17P3S	-4	C00136	3436
c40coa[m]	butyryl-CoA	C25H42N7O17P3S	C25H38N7O17P3S	-4	C00136	3436
c4dacp[c]	trans-but-2-enoyl-[acp]	C4H5OSR	C4H5OSR	0
c4dcoa[m]	trans-but-2-enoyl-CoA	C25H40N7O17P3S	C25H36N7O17P3S	-4	C00877	4133
c4hacp[c]	3-hydroxybutyryl-[acp]	C4H7O2SR	C4H7O2SR	0
c4hcoa[m]	3-hydroxybutyryl-CoA	C25H42N7O18P3S	C25H38N7O18P3S	-4		754
c60[c]	hexanoate	C6H12O2	C6H11O2	-1	C01585	474
c60[e]	hexanoate	C6H12O2	C6H11O2	-1	C01585	474
c60acp[c]	hexanoyl-[acp]	C6H11OSR	C6H11OSR	0	C05749	844
c60coa[c]	hexanoyl-CoA	C27H46N7O17P3S	C27H42N7O17P3S	-4	C05270	7657
c60coa[m]	hexanoyl-CoA	C27H46N7O17P3S	C27H42N7O17P3S	-4	C05270	7657
c6dacp[c]	trans-hex-2-enoyl-[acp]	C6H9OSR	C6H9OSR	0	C05748	843
c6dcoa[m]	trans-hex-2-enoyl-CoA	C27H44N7O17P3S	C27H40N7O17P3S	-4	C05271	7658
c6hacp[c]	3-hydroxyhexanoyl-[acp]	C6H11O2SR	C6H11O2SR	0	C05747	842
c6hcoa[m]	3-hydroxyhexanoyl-CoA	C27H46N7O18P3S	C27H42N7O18P3S	-4	C05268	7655
c6oacp[c]	3-oxohexanoyl-[acp]	C6H9O2SR	C6H9O2SR	0	C05746	841
c6ocoa[m]	3-oxohexanoyl-CoA	C27H44N7O18P3S	C27H40N7O18P3S	-4	C05269	7656
c80[c]	octanoate	C8H16O2	C8H15O2	-1	C01545
c80[e]	octanoate	C8H16O2	C8H15O2	-1	C01545
c80acp[c]	octanoyl-[acp]	C8H15OSR	C8H15OSR	0	C05752	847
c80coa[c]	octanoyl-CoA	C29H50N7O17P3S	C29H46N7O17P3S	-4	C01944	548
c80coa[m]	octanoyl-CoA	C29H50N7O17P3S	C29H46N7O17P3S	-4	C01944	548
c8dacp[c]	trans-oct-2-enoyl-[acp]	C8H13OSR	C8H13OSR	0	C05751	846
c8dcoa[m]	trans-oct-2-enoyl-CoA	C29H48N7O17P3S	C29H44N7O17P3S	-4	C05276	7663
c8hacp[c]	3-hydroxyoctanoyl-[acp]	C8H15O2SR	C8H15O2SR	0	C04620	721
c8hcoa[m]	3-hydroxyoctanoyl-CoA	C29H50N7O18P3S	C29H46N7O18P3S	-4	C05266	7653
c8oacp[c]	3-oxooctanoyl-[acp]	C8H13O2SR	C8H13O2SR	0	C05750	845
c8ocoa[m]	3-oxooctanoyl-CoA	C29H48N7O18P3S	C29H44N7O18P3S	-4	C05267	7654
ca[c]	calcium	Ca	Ca	2	C00076	3376
ca[e]	calcium	Ca	Ca	2	C00076	3376
caasp[c]	N-carbamoyl-L-aspartate	C5H8N2O5	C5H6N2O5	-2	C00438	3727
cair[c]	1-(5-phospho-D-ribosyl)-5-amino-4-imidazolecarboxylate	C9H14N3O9P	C9H12N3O9P	-2	C04751	7321
camp[c]	3',5'-cyclic AMP	C10H12N5O6P	C10H11N5O6P	-1	C00575	3854
cap[c]	carbamoyl phosphate	CH4NO5P	CH2NO5P	-2	C00169	3469
cap[m]	carbamoyl phosphate	CH4NO5P	CH2NO5P	-2	C00169	3469
car[c]	carnitine	C7H15NO3	C7H15NO3	0	C00487	377
car[m]	carnitine	C7H15NO3	C7H15NO3	0	C00487	377
carbo[c]	Carboxylate	CO2R	CO2R	0	C00060	336
cbccp[c]	carboxybiotin-carboxyl-carrier protein	C18H26N5O6SR2	C18H26N5O6SR2	0	C04419	751
ccl[c]	catechol	C6H6O2	C6H6O2	0	C00090	339
ccmp[c]	3',5'-cyclic CMP	C9H12N3O7P	C9H11N3O7P	-1	C00941	4193
cda[c]	Cholesta-8,24-dien-3-ol-4-carboxylate	C28H44O3	C28H43O3	-1
cdol[c]	4-methylcholesta-8,24-diene-3-ol	C28H44O	C28H44O	0	C15816	4725141
cdp[c]	CDP	C9H15N3O11P2	C9H13N3O11P2	-2	C00112	3412
cdpcln[c]	CDP-choline	C14H26N4O11P2	C14H25N4O11P2	-1	C00307	361
cdpcln[m]	CDP-choline	C14H26N4O11P2	C14H25N4O11P2	-1	C00307	361
cdpdg[c]	CDP-diacylglycerols	C14H19N3O15P2R2	C14H19N3O15P2R2	0	C00269	3567
cdpdg[m]	CDP-diacylglycerols	C14H19N3O15P2R2	C14H19N3O15P2R2	0	C00269	3567
cdpea[c]	CDP-ethanolamine	C11H20N4O11P2	C11H19N4O11P2	-1	C00570	3849
cellob[c]	cellobiose	C12H22O11	C12H22O11	0	C00185	3485
cellob[e]	cellobiose	C12H22O11	C12H22O11	0	C00185	3485
cellot[e]	cellotriose	C18H32O16	C18H32O16	0	C06219	8465
cellu[e]	cellulose	C6H10O6	C6H10O6	0	C00760	422
cer1[c]	ceramides	C19H36NO3R	C19H36NO3R	0	C00195	3495
cer1[e]	ceramides;N-Acylsphingosine	C19H36NO3R	C19H36NO3R	0	C00195	3495
cerb1a[c]	cerebrin 1 (comp. A)	C36H74NO4	C36H74NO4	0		248574
cerb1b[c]	cerebrin 1 (comp. B)	C36H72NO4	C36H72NO4	0		248574
cerb1c[c]	cerebrin 1 (comp. C)	C36H74NO4	C36H74NO4	0		248574
cerb1d[c]	cerebrin 1 (comp. D)	C36H72NO4	C36H72NO4	0		248574
cerb2a[c]	cerebrin 2 (comp. A)	C36H74NO3	C36H74NO3	0		248574
cerb2b[c]	cerebrin 2 (comp. B)	C36H72NO3	C36H72NO3	0		248574
cerb2c[c]	cerebrin 2 (comp. C)	C36H74NO3	C36H74NO3	0		248574
cerb2d[c]	cerebrin 2 (comp. D)	C36H72NO3	C36H72NO3	0		248574
cereb1[c]	cerebroside 1	C36H74NO3	C36H74NO3	0
cereb2[c]	cerebroside 2	C36H72NO3	C36H72NO3	0
cgly[c]	L-cysteinylglycine	C5H10N2O3S	C5H10N2O3S	0	C01419	466
cgmp[c]	3',5'-cyclic GMP	C10H12N5O7P	C10H11N5O7P	-1	C00942	4194
chcoa[c]	pimeloyl-CoA	C28H46N7O19P3S	C28H41N7O19P3S	-5	C01063	432
chib[c]	chitobiose	C16H28N2O11	C16H28N2O11	0	C01674	4818
chib[e]	chitobiose	C16H28N2O11	C16H28N2O11	0	C01674	4818
chit[c]	chitin	C8H13NO5	C8H13NO5	0	C00461	3745
chit[e]	chitin	C8H13NO5	C8H13NO5	0	C00461	3745
chito[e]	chitin	C8H13NO5	C8H13NO5	0	C00461	3745
chlestr[c]	Cholesterol ester	C28H45O2R	C28H45O2R	0	C02530	5537
chor[c]	chorismate	C10H10O6	C10H8O6	-2	C00251	355
chtrol[c]	cholesterol	C27H46O	C27H46O	0	C00187	3487
cit[c]	citrate	C6H8O7	C6H5O7	-3	C00158	3458
cit[e]	citrate	C6H8O7	C6H5O7	-3	C00158	3458
cit[m]	citrate	C6H8O7	C6H5O7	-3	C00158	3458
citr[c]	L-citrulline	C6H13N3O3	C6H13N3O3	0	C00327	3621
citr[m]	L-citrulline	C6H13N3O3	C6H13N3O3	0	C00327	3621
cl[c]	cardiolipin	C13H18O17P2R4	C13H18O17P2R4	0	C05980	8259
cl[m]	cardiolipin	C13H18O17P2R4	C13H18O17P2R4	0	C05980	8259
cln[c]	choline	C5H13NO	C5H14NO	1	C00114	3414
cln[e]	choline	C5H13NO	C5H14NO	1	C00114	3414
cln[m]	choline	C5H13NO	C5H14NO	1	C00114	3414
cmp[c]	Cytidine-5'-monophosphate	C9H14N3O8P	C9H12N3O8P	-2	C00055	3357
cmp[m]	Cytidine-5'-monophosphate	C9H14N3O8P	C9H12N3O8P	-2	C00055	3357
cmuc[e]	3-Carboxy-cis,cis-muconate	C7H6O6	C7H6O6	0	C01163
cmusa[c]	2-amino-3-carboxymuconate semialdehyde	C7H7NO5	C7H5NO5	-2	C04409	744
co[c]	Carbon monoxide	CO	HCO	1	C00237
co2[c]	CO2	CO2	CO2	0	C00011	3313
co2[e]	CO2	CO2	CO2	0	C00011	3313
co2[m]	CO2	CO2	CO2	0	C00011	3313
coa[c]	coenzyme A	C21H36N7O16P3S	C21H32N7O16P3S	-4	C00010	3312
coa[m]	coenzyme A	C21H36N7O16P3S	C21H32N7O16P3S	-4	C00010	3312
coac[e]	3-Carboxy-2,5-dihydro-5-oxofuran-2-acetate	C7H6O6	C7H6O6	0	C04553	7158
cpad5p[c]	1-(2-carboxyphenylamino)-1-deoxy-D-ribulose 5-phosphate	C12H16NO9P	C12H13NO9P	-3	C01302	452
cpgi[c]	Coproporphyrinogen I	C36H44N4O8	C36H44N4O8	0	C05768
cpgiii[c]	coproporphyrinogen III	C36H44N4O8	C36H40N4O8	-4	C03263	6127
cpgiii[m]	coproporphyrinogen III	C36H44N4O8	C36H40N4O8	-4	C03263	6127
cronylcoa[m]	crotonoyl-CoA	C25H40N7O17P3S	C25H36N7O17P3S	-4	C00877	4133
ctp[c]	Cytidine 5'-triphosphate	C9H16N3O14P3	C9H13N3O14P3	-3	C00063	3363
ctp[m]	Cytidine 5'-triphosphate	C9H16N3O14P3	C9H13N3O14P3	-3	C00063	3363
cu[c]	copper	Cu	Cu	0	C00070	337
cu[e]	copper	Cu	Cu	0	C00070	337
cyan[e]	cyanate	CHNO	CHNO	0	C01417	464
cys[c]	L-cysteine	C3H7NO2S	C3H7NO2S	0	C00097	3397
cys[e]	L-cysteine	C3H7NO2S	C3H7NO2S	0	C00097	3397
cyse[c]	L-Cysteate	C3H7NO5S	C3H6NO5S	-1	C00506	3789
cysn[c]	cystine	C6H12N2O4S2	C6H12N2O4S2	0	C00491
cyst[c]	cystine	C6H12N2O4S2	C6H12N2O4S2	0	C01420	467
cytc[m]	cytochrome c	C42H44FeN8O8S2R4	C42H44FeN8O8S2R4	0	C00524	387
cytd[c]	cytidine	C9H13N3O5	C9H13N3O5	0	C00475	3758
cyts[c]	cytosine	C4H5N3O	C4H5N3O	0	C00380	367
cyts[e]	cytosine	C4H5N3O	C4H5N3O	0	C00380	367
d45pi[c]	1-phosphatidyl-1D-myo-inositol 4,5-bisphosphates	C11H19O19P3R2	C11H19O19P3R2	0	C04637	7226
d6pgc[c]	6-phospho-D-gluconate	C6H13O10P	C6H10O10P	-3	C00345	3638
d6pgc[e]	6-phospho-D-gluconate	C6H13O10P	C6H10O10P	-3	C00345	3638
d6pgl[c]	D-Glucono-1,5-lactone 6-phosphate	C6H11O9P	C6H9O9P	-2	C01236	8145737
d6pgl[e]	D-Glucono-1,5-lactone 6-phosphate	C6H11O9P	C6H9O9P	-2	C01236	8145737
d6pr5po[c]	2,5-Diamino-6-(5-phospho-D-ribitylamino)pyrimidin-4(3H)-one	C9H18N5O8P	C9H16N5O8P	-2	C18910	124489582
d6rp5p[c]	2,5-diamino-6-hydroxy-4-(5'-phosphoribosylamino)-pyrimidine	C9H16N5O8P	C9H14N5O8P	-2	C01304	4522
d6rp5p[m]	2,5-diamino-6-hydroxy-4-(5'-phosphoribosylamino)-pyrimidine	C9H16N5O8P	C9H14N5O8P	-2	C01304	4522
d8rl[c]	6,7-dimethyl-8-(1-D-ribityl)lumazine	C13H18N4O6	C13H18N4O6	0
da[c]	deoxyadenosine	C10H13N5O3	C10H13N5O3	0	C00559	3839
da[m]	deoxyadenosine	C10H13N5O3	C10H13N5O3	0	C00559	3839
dadp[c]	2'-Deoxyadenosine 5'-diphosphate	C10H15N5O9P2	C10H13N5O9P2	-2	C00206	356
dagly[c]	diglycerides	C5H6O5R2	C5H6O5R2	0	C00165	3465
dagly[e]	diglycerides	C5H6O5R2	C5H6O5R2	0	C00165	3465
damp[c]	2'-Deoxyadenosine 5'-phosphate	C10H14N5O6P	C10H12N5O6P	-2	C00360	3651
danna[c]	7,8-diaminononanoate	C9H20N2O2	C9H21N2O2	1	C01037	428
danna[m]	7,8-diaminononanoate	C9H20N2O2	C9H21N2O2	1	C01037	428
daprp[c]	trimethylenediamine	C3H10N2	C3H12N2	2	C00986	4233
dasp[c]	D-aspartate	C4H7NO4	C4H6NO4	-1	C00402	3692
dasp[e]	D-aspartate	C4H7NO4	C4H6NO4	-1	C00402	3692
datp[c]	2'-Deoxyadenosine 5'-triphosphate	C10H16N5O12P3	C10H13N5O12P3	-3	C00131	3431
db4p[c]	2-hydroxy-3-oxobutyl phosphate	C4H9O6P	C4H7O6P	-2	C15556	17396548
dc[c]	deoxycytidine	C9H13N3O4	C9H13N3O4	0	C00881	4137
dcda[c]	4alpha-Methylzymosterol-4-carboxylate;4-methylcholesta-8,24-diene-3-ol-4-carboxylate	C29H46O3	C29H45O3	-1	C15808	4725133
dcdol[c]	14-Demethyllanosterol;4,4-Dimethylcholesta-8,24-diene-3-ol	C29H48O	C29H48O	0	C05108	7534
dcdp[c]	2'-Deoxycytidine 5'-diphosphate	C9H15N3O10P2	C9H13N3O10P2	-2	C00705	3972
dcer2[c]	dihydroceramides	C19H38NO3R	C19H38NO3R	0	C12126	14273
dcmp[c]	2'-Deoxycytidine 5'-monophosphate	C9H14N3O7P	C9H12N3O7P	-2	C00239	3538
dctol[c]	4,4-dimethylcholesta-8,14,24-trienol	C29H46O	C29H46O	0	C11455	13626
dctp[c]	2'-Deoxycytidine 5'-triphosphate	C9H16N3O13P3	C9H13N3O13P3	-3	C00458	3742
destol[c]	Desmosterol	C27H44O	C27H44O	0	C01802	4928
dfru[c]	D-fructose	C6H12O6	C6H12O6	0	C00095 C02336	3395
dfru[e]	D-fructose	C6H12O6	C6H12O6	0	C00095 C02336	3395
dg[c]	deoxyguanosine	C10H13N5O4	C10H13N5O4	0	C00330	3624
dg6p[c]	alpha-D-glucose 6-phosphate	C6H13O9P	C6H11O9P	-2	C00668	3937
dgdmipc[c]	Digalactosyl-dimannosyl-inositol-P-ceramide	C74H140NO33P	C74H139NO33P	-1
dgdp[c]	2'-Deoxyguanosine 5'-diphosphate	C10H15N5O10P2	C10H13N5O10P2	-2	C00361	3652
dgeod[c]	dihydrogeodin	C17H17CLO7	C17H16CLO7	-1
dglc[c]	D-glucose	C6H12O6	C6H12O6	0	C00031	3333
dglc[e]	D-glucose	C6H12O6	C6H12O6	0	C00031	3333
dgmp[c]	2'-Deoxyguanosine 5'-phosphate	C10H14N5O7P	C10H12N5O7P	-2	C00362	3653
dgtp[c]	2'-Deoxyguanosine 5'-triphosphate	C10H16N5O13P3	C10H13N5O13P3	-3	C00286	3581
dhba[c]	2,3-dihydroxybenzoate	C7H6O4	C7H5O4	-1	C00196	3496
dhdestol[c]	7-Dehydrodesmosterol	C27H42O	C27H42O	0	C05107	7533
dhdmst[c]	dihydrodemethylsterigmatocystin	C17H12O6	C17H12O6	0		5486528
dhf[c]	dihydrofolate	C19H21N7O6	C19H19N7O6	-2	C00415	375
dhf[m]	dihydrofolate	C19H21N7O6	C19H19N7O6	-2	C00415	375
dhival[m]	2,3-Dihydroxy-isovalerate	C5H10O4	C5H9O4	-1	C04039	6741
dhmacl[c]	Dihydromonacolin L	C19H30O3	C19H30O3	0	C15536	17396528
dhmva[m]	(R)-2,3-dihydroxy-3-methylbutanoate	C5H10O4	C5H9O4	-1	C04272	6935
dhomst[c]	dihydro-O-methylsterigmatocystin	C19H16O6	C19H16O6	0
dhp[c]	7,8-dihydroneopterin	C9H13N5O4	C9H13N5O4	0	C04874	7426
dhpen[m]	2,4-Dihydroxyhept-2-enedioate	C7H10O6	C7H8O6	-2	c06201
dhplys[m]	protein-dihydrolipoyllysine	C8H16NOS2R	C8H16NOS2R	0	C02972	5884
dhpt[c]	dihydropteroate	C14H14N6O3	C14H13N6O3	-1	C00921	4175
dhsk[c]	3-dehydroshikimate	C7H8O5	C7H7O5	-1	C02637	8145534
dhsk[e]	3-dehydroshikimate	C7H8O5	C7H7O5	-1	C02637	8145534
dhsp[c]	sphinganine 1-phosphate	C18H40NO5P	C18H39NO5P	-1	C01120	4351
dhsph[c]	3-dehydrosphinganine	C18H37NO2	C18H38NO2	1	C02934	5855
dhst[c]	dihydrosterigmatocystin	C18H14O6	C18H14O6	0
dhthy[c]	5,6-Dihydrothymine	C5H8N2O2	C5H8N2O2	0	C00906	4161
dhura[c]	5,6-dihydrouracil	C4H6N2O2	C4H6N2O2	0	C00429	3718
didipc[c]	(S)-2,3-dihydrodipicolinate	C7H7NO4	C7H5NO4	-2	C03340	6183
didp[c]	2'-Deoxyinosine 5'-diphosphate	C10H14N4O10P2	C10H12N4O10P2	-2	C01344
dimgp[c]	D-erythro-1-(imidazol-4-yl)glycerol 3-phosphate	C6H11N2O6P	C6H9N2O6P	-2	C04666	7249
dimp[c]	2'-Deoxyinosine 5'-phosphate	C10H13N4O7P	C10H13N4O7P	0	C06196
din[c]	deoxyinosine	C10H12N4O4	C10H12N4O4	0	C05512	7859
ditp[c]	2'-Deoxyinosine 5'-triphosphate	C10H15N4O13P3	C10H12N4O13P3	-3	C01345
dkmtp[c]	2,3-Diketo-5-methylthiopentyl-1-phosphate	C6H11O6PS	C6H9O6PS	-2	C15650
dmand[c]	(R)-mandelate	C8H8O3	C8H7O3	-1	C01983	58
dmgly[m]	N,N-dimethylglycine	C4H9NO2	C4H9NO2	0	C01026	4271
dmipc[c]	Di-mannosyl-inositol-P-ceramide	C62H120NO21P	C62H119NO21P	-1
dmlr[c]	6,7-Dimethyl-8-(D-ribityl)lumazine	C13H18N4O6	C13H17N4O6	-1	C04332	6983
dmnad[c]	deamido-NAD(+)	C21H26N6O15P2	C21H24N6O15P2	-2	C00857	4114
dmpeno[c]	1,2-Dihydroxy-5-(methylthio)pent-1-en-3-one	C6H10O3S	C6H10O3S	0	C15606
dmpp[c]	dimethylallyl diphosphate	C5H12O7P2	C5H10O7P2	-2	C00235	3534
dmpyq[m]	2,3-Dimethyl-5-phytylquinol	C28H48O2	C28H48O2	0	C15883	472523
dmst[c]	6-demethylsterigmatocystin	C17H10O6	C17H10O6	0	C03683	6458
dmvat[m]	(R)-2,3-Dihydroxy-3-methylvalerate	C6H12O4	C6H11O4	-1	C06007	828
dor5p[c]	2-deoxy-D-ribose 5-phosphate	C5H11O7P	C5H9O7P	-2	C00673	3942
doris[c]	Deoxyribose	C5H10O4	C5H10O4	0	C01801	4927
doris[e]	Deoxyribose	C5H10O4	C5H10O4	0	C01801	4927
doroa[c]	(S)-dihydroorotate	C5H6N2O4	C5H5N2O4	-1	C00337	363
dpcoa[c]	dephospho-CoA	C21H35N7O13P2S	C21H33N7O13P2S	-2	C00882	4138
dqt[c]	3-dehydroquinate	C7H10O6	C7H9O6	-1	C00944	4196
dr1p[c]	2-Deoxy-D-ribose 1-phosphate	C5H11O7P	C5H9O7P	-2	C00672
dsam[c]	S-adenosylmethioninamine	C14H22N6O3S	C14H24N6O3S	2	C01137	4368
dt[c]	thymidine	C10H14N2O5	C10H14N2O5	0	C00214	3514
dtb[c]	dethiobiotin	C10H18N2O3	C10H17N2O3	-1	C01909	517
dtb[m]	dethiobiotin	C10H18N2O3	C10H17N2O3	-1	C01909	517
dtdp[c]	Deoxythymidine 5'-diphosphate	C10H16N2O11P2	C10H14N2O11P2	-2	C00363	3654
dtmp[c]	Deoxythymidine 5'-phosphate	C10H15N2O8P	C10H13N2O8P	-2	C00364	3655
dttp[c]	Deoxythymidine 5'-triphosphate	C10H17N2O14P3	C10H14N2O14P3	-3	C00459	3743
du[c]	deoxyuridine	C9H12N2O5	C9H12N2O5	0	C00526	389
dudp[c]	2'-Deoxyuridine 5'-diphosphate	C9H14N2O11P2	C9H12N2O11P2	-2	C01346	4551
dump[c]	Deoxyuridine 5'-phosphate	C9H13N2O8P	C9H11N2O8P	-2	C00365	3656
dutp[c]	2'-Deoxyuridine 5'-triphosphate	C9H15N2O14P3	C9H12N2O14P3	-3	C00460	3744
e4p[c]	D-erythrose 4-phosphate	C4H9O7P	C4H7O7P	-2	C00279	3574
egstr[c]	ergosterol	C28H44O	C28H44O	0	C01694	4835
egteol[c]	5,7,22,24(28)-ergostatetraenol	C28H42O	C28H42O	0	C05440	782
ehglu[c]	L-erythro-4-Hydroxyglutamate	C5H9NO5	C5H8NO5	-1	C05947	8231
epm[e]	Epimelibiose	C12H22O11	C12H22O11	0	C05400	7767
epst[c]	episterol	C28H46O	C28H46O	1	C15777	472513
ergod[c]	Ergosta-5,7-dienol;5,7,24(28)-Ergostatrienol	C28H44O	C28H44O	0	C15778	472514
ergose[c]	sterol ester	C18H27O2R	C18H27O2R	0
eth[c]	ethanol	C2H6O	C2H6O	0	C00469	3752
eth[e]	ethanol	C2H6O	C2H6O	0	C00469	3752
eth[m]	ethanol	C2H6O	C2H6O	0	C00469	3752
ethla[c]	Ethanolamine	C2H7NO	C2H8NO	1	C00189	6489
f16p[c]	beta-D-Fructose 1,6-bisphosphate	C6H14O12P2	C6H10O12P2	-4	C05378	7752
f16p[m]	beta-D-Fructose 1,6-bisphosphate	C6H14O12P2	C6H10O12P2	-4	C05378	7752
f26p[c]	D-fructose 2,6-bisphosphate	C6H14O12P2	C6H10O12P2	-4	C00665	3934
f6p[c]	beta-D-Fructose 6-phosphate	C6H13O9P	C6H11O9P	-2	C05345 C00085	7723
f6p[m]	beta-D-Fructose 6-phosphate	C6H13O9P	C6H11O9P	-2	C05345 C00085	7723
fad[c]	Flavin adenine dinucleotide	C27H33N9O15P2	C27H30N9O15P2	-3	C00016	3318
fad[e]	Flavin adenine dinucleotide	C27H33N9O15P2	C27H30N9O15P2	-3	C00016	3318
fad[m]	Flavin adenine dinucleotide	C27H33N9O15P2	C27H30N9O15P2	-3	C00016	3318
fadh2[c]	FADH2	C27H35N9O15P2	C27H33N9O15P2	-2	C01352	4556
fadh2[e]	FADH2	C27H35N9O15P2	C27H33N9O15P2	-2	C01352	4556
fadh2[m]	FADH2	C27H35N9O15P2	C27H33N9O15P2	-2	C01352	4556
fald[c]	formaldehyde	CH2O	CH2O	0	C00067	3367
fald[m]	formaldehyde	CH2O	CH2O	0	C00067	3367
fe[c]	Iron	Fe	Fe	0	C00023	3325
fe[e]	Iron	Fe	Fe	0	C00023	3325
feri[m]	ferricytochrome c	C42H44FeN8O8S2R4	C42H44FeN8O8S2R4	0	C00125	3425
fero[m]	ferrocytochrome c	C42H44FeN8O8S2R4	C42H44FeN8O8S2R4	0	C00126	3426
fest[c]	fecosterol	C28H46O	C28H46O	0	C04525	7136
ffa[c]	free faty acid	R	R	0
ffa[m]	free faty acid	R	R	0
fgam[c]	2-formamido-N(1)-(5-phospho-D-ribosyl)acetamidine	C8H16N3O8P	C8H15N3O8P	-1	C04640	7229
fgar[c]	N(2)-formyl-N(1)-(5-phospho-D-ribosyl)glycinamide	C8H15N2O9P	C8H13N2O9P	-2	C04376	717
fgt[c]	S-formylglutathione	C11H17N3O7S	C11H16N3O7S	-1	C01031	4274
fkyn[c]	L-formylkynurenine	C11H12N2O4	C11H12N2O4	0	C02700	5664
fmn[c]	Riboflavin-5-phosphate	C17H21N4O9P	C17H18N4O9P	-3	C00061	3361
fmn[e]	Riboflavin-5-phosphate	C17H21N4O9P	C17H18N4O9P	-3	C00061	3361
foli[c]	Folinic acid	C20H23N7O7	C20H21N7O7	-2	C03479	6294
foli[m]	Folinic acid	C20H23N7O7	C20H21N7O7	-2	C03479	6294
for[c]	formate	CH2O2	CHO2	-1	C00058	3358
for[e]	formate	CH2O2	CHO2	-1	C00058	3358
for[m]	formate	CH2O2	CHO2	-1	C00058	3358
fot[c]	folate	C19H19N7O6	C19H17N7O6	-2	C00504
fpp[c]	2-trans,6-trans-farnesyl diphosphate	C15H28O7P2	C15H26O7P2	-2	C00448	3736
frid[c]	Formamide	CH3NO	CH3NO	0	C00488
frutn[c]	D-fructuronate	C6H10O7	C6H9O7	-1	C00905	416
fthf[c]	10-formyltetrahydrofolate	C20H23N7O7	C20H21N7O7	-2	C00234	3533
fthf[m]	10-formyltetrahydrofolate	C20H23N7O7	C20H21N7O7	-2	C00234	3533
fuacac[c]	4-fumarylacetoacetate	C8H8O6	C8H6O6	-2	C01061	43
fum[c]	fumarate	C4H4O4	C4H2O4	-2	C00122	3422
fum[e]	fumarate	C4H4O4	C4H2O4	-2	C00122	3422
fum[m]	fumarate	C4H4O4	C4H2O4	-2	C00122	3422
g[c]	D-glycerate	C3H6O4	C3H5O4	-1	C00258	3557
g15l[e]	D-glucono-1,5-lactone	C6H10O6	C6H10O6	0	C00198	3498
g1p[c]	alpha-D-glucose 1-phosphate	C6H13O9P	C6H11O9P	-2	C00103	343
ga6p[c]	D-glucosamine 6-phosphate	C6H14NO8P	C6H13NO8P	-1	C00352	3645
ga6p[m]	D-glucosamine 6-phosphate	C6H14NO8P	C6H13NO8P	-1	C00352	3645
gaba[c]	4-Aminobutanoate	C4H9NO2	C4H9NO2	0	C00334	3628
gaba[e]	4-Aminobutanoate	C4H9NO2	C4H9NO2	0	C00334	3628
gaba[m]	4-Aminobutanoate	C4H9NO2	C4H9NO2	0	C00334	3628
gabal[c]	4-aminobutanal	C4H9NO	C4H10NO	1	C00555	3835
gal[c]	D-galactose	C6H12O6	C6H12O6	0	C00124	3424
gal[e]	D-galactose	C6H12O6	C6H12O6	0	C00124	3424
gal1p[c]	alpha-D-galactose 1-phosphate	C6H13O9P	C6H11O9P	-2	C00446	3734
galcer[c]	Galactosylceramide	C25H46NO8R	C25H46NO8R	0	C02686	5655
gali[c]	galactitol	C6H14O6	0	0
galnt[c]	D-galactonate	C6H12O7	C6H11O7	-1	C00880	4136
galnt[e]	D-galactonate	C6H12O7	C6H11O7	-1	C00880	4136
galunt[e]	D-galacturonate	C6H10O7	C6H10O7	0	C00333	3627
gar[c]	N(1)-(5-phospho-D-ribosyl)glycinamide	C7H15N2O8P	C7H14N2O8P	-1	C03838	6578
gbad[c]	4-guanidinobutanamide	C5H12N4O	C5H13N4O	1	C03078	5976
gbat[c]	4-guanidinobutanoate	C5H11N3O2	C5H11N3O2	0	C01035	4278
gc[c]	gamma-L-glutamyl-L-cysteine	C8H14N2O5S	C8H13N2O5S	-1	C00669	3938
gcar[c]	D-Glucarate	C6H10O8	C6H8O8	-2	C00818	476
gdmipc[c]	Galactosyl-Dimannosyl-inositol-P-ceramide	C68H130NO27P	C68H129NO27P	-1
gdp[c]	Guanosine 5'-diphosphate	C10H15N5O11P2	C10H13N5O11P2	-2	C00035	3337
gdp[m]	Guanosine 5'-diphosphate	C10H15N5O11P2	C10H13N5O11P2	-2	C00035	3337
gdpman[c]	GDP-mannose	C16H25N5O16P2	C16H23N5O16P2	-2	C00096	3396
gdpman[e]	GDP-mannose	C16H25N5O16P2	C16H23N5O16P2	-2	C00096	3396
geod[c]	geodin	C17H15CLO7	C17H15CLO7	0
ggl[e]	Galactosylglycerol	C9H18O8	C9H18O8	0	C05401	7768
ggpp[c]	geranylgeranyl diphosphate	C20H36O7P2	C20H34O7P2	-2	C00353	3646
gl[c]	glycerol	C3H8O3	C3H8O3	0	C00116	3416
gl[e]	glycerol	C3H8O3	C3H8O3	0	C00116	3416
gl3p[c]	sn-glycerol 3-phosphate	C3H9O6P	C3H7O6P	-2	C00093	3393
gl3p[e]	sn-glycerol 3-phosphate	C3H9O6P	C3H7O6P	-2	C00093	3393
gl3p[m]	sn-glycerol 3-phosphate	C3H9O6P	C3H7O6P	-2	C00093	3393
glal[c]	glycolaldehyde	C2H4O2	C2H4O2	0	C00266	3564
glcn[c]	D-glucosamine	C6H13NO5	C6H14NO5	1	C00329	3623
glcnt[c]	D-gluconate	C6H12O7	C6H11O7	-1	C00257	3556
glcnt[e]	D-gluconate	C6H12O7	C6H11O7	-1	C00257	3556
glcurn[c]	D-glucuronate	C6H10O7	C6H9O7	-1	C00191	3491
gln[c]	L-glutamine	C5H10N2O3	C5H10N2O3	0	C00064	3364
gln[e]	L-glutamine	C5H10N2O3	C5H10N2O3	0	C00064	3364
gln[m]	L-glutamine	C5H10N2O3	C5H10N2O3	0	C00064	3364
gltcoa[m]	glutaryl-CoA	C26H42N7O19P3S	C26H37N7O19P3S	-5	C00527	381
glu[c]	L-glutamate	C5H9NO4	C5H8NO4	-1	C00025	3327
glu[e]	L-glutamate	C5H9NO4	C5H8NO4	-1	C00025	3327
glu[m]	L-glutamate	C5H9NO4	C5H8NO4	-1	C00025	3327
glu1sal[c]	(S)-4-amino-5-oxopentanoic acid	C5H9NO3	C5H9NO3	0	C03741	654
glu1sal[m]	(S)-4-amino-5-oxopentanoic acid	C5H9NO3	C5H9NO3	0	C03741	654
glua[e]	D-Glucosaminide	C12H24N2O10(C6H11NO3)n	C12H24N2O10(C6H11NO3)n	0	C06023	8295
glucer1[c]	Glucocerebroside 1	R	R	0
glucer2[c]	Glucocerebroside 2	R	R	0
glucur[c]	beta-D-glucosiduronic acids	C6H9O7R	C6H9O7R	0	C03033	5938
glugsal[c]	L-glutamate 5-semialdehyde	C5H9NO3	C5H9NO3	0	C01165	4392
glugsal[m]	L-glutamate 5-semialdehyde	C5H9NO3	C5H9NO3	0	C01165	4392
glup[c]	D-alpha-glutamyl phosphate	C5H10NO7P	C5H8NO7P	-2	C03734	6497
glutrna[c]	tRNA(Glu)	C20H29N5O16P2R2	C20H29N5O16P2R2	-1	C01641	479
glx[c]	glyoxylate	C2H2O3	C2HO3	-1	C00048	335
glx[m]	glyoxylate	C2H2O3	C2HO3	-1	C00048	335
gly[c]	glycine	C2H5NO2	C2H5NO2	0	C00037	3339
gly[e]	glycine	C2H5NO2	C2H5NO2	0	C00037	3339
gly[m]	glycine	C2H5NO2	C2H5NO2	0	C00037	3339
glya[c]	glycolate	C2H4O3	C2H3O3	-1	C00160	346
glya[m]	glycolate	C2H4O3	C2H3O3	-1	C00160	346
glyal[c]	D-glyceraldehyde	C3H6O3	C3H6O3	0	C00577	3856
glycogen[c]	glycogen	C24H42O21	C24H42O21	0	C00182	3482
glycogen[e]	glycogen	C24H42O21	C24H42O21	0	C00182	3482
glyn[c]	glycerone	C3H6O3	C3H6O3	0	C00184	3484
glyn[m]	glycerone	C3H6O3	C3H6O3	0	C00184	3484
glypcln[c]	Glycerophosphocholine	C8H20NO6P	C8H20NO6P	0	C00670	3939
glypcln[e]	Glycerophosphocholine	C8H20NO6P	C8H20NO6P	0	C00670	3939
glypcln[m]	Glycerophosphocholine	C8H20NO6P	C8H20NO6P	0	C00670	3939
glypeln[c]	Glycerophosphoethanolamine	C5H14NO6P	C5H14NO6P	0	C01233	4454
gmp[c]	Guanosine 5'-phosphate	C10H14N5O8P	C10H12N5O8P	-2	C00144	3444
gn[c]	guanine	C5H5N5O	C5H5N5O	0	C00242	3541
gn[e]	guanine	C5H5N5O	C5H5N5O	0	C00242	3541
gpp[c]	geranyl diphosphate	C10H20O7P2	C10H18O7P2	-2	C00341	3634
gsh[c]	glutathione	C10H17N3O6S	C10H16N3O6S	-1	C00051	3353
gsn[c]	guanosine	C10H13N5O5	C10H13N5O5	0	C00387	3677
gssg[c]	oxidized glutathione;Glutathione disulfide	C20H32N6O12S2	C20H30N6O12S2	-2	C00127	3427
gtp[c]	Guanosine 5'-triphosphate	C10H16N5O14P3	C10H13N5O14P3	-3	C00044	3346
gtp[m]	Guanosine 5'-triphosphate	C10H16N5O14P3	C10H13N5O14P3	-3	C00044	3346
gua[c]	guaiacol	C7H8O2	C7H8O2	0	C15572	17396564
gua[e]	guaiacol	C7H8O2	C7H8O2	0	C15572	17396564
h[c]	Hydron	H	H	1	C00080	338
h[e]	Hydron	H	H	1	C00080	338
h[m]	Hydron	H	H	1	C00080	338
h2o[c]	water	H2O	H2O	0	C00001	333
h2o[e]	water	H2O	H2O	0	C00001	333
h2o[m]	water	H2O	H2O	0	C00001	333
h2o2[c]	Hydrogen peroxide	H2O2	H2O2	0	C00027	3329
h2o2[e]	Hydrogen peroxide	H2O2	H2O2	0	C00027	3329
h2o2[m]	Hydrogen peroxide	H2O2	H2O2	0	C00027	3329
h2s[c]	Hydrogen sulfide	H2S	HS	-1	C00283	3578
hacn[m]	cis-Homoaconitate	C7H8O6	C7H5O6	-3	C04002	6715
hakg[c]	D-4-Hydroxy-2-oxoglutarate	C5H6O6	C5H4O6	-2	C05946	823
han[c]	3-hydroxyanthranilate	C7H7NO3	C7H6NO3	-1	C00632	395
havn[c]	5-hydroxyaverantin	C20H20O8	C20H20O8	0		2521115
hcit[m]	homocitrate	C7H10O7	C7H7O7	-3	C01251	4471
hco3[c]	Hydrogencarbonate	CH2O3	CHO3	-1	C00288	3583
hco3[e]	Hydrogencarbonate	CH2O3	CHO3	-1	C00288	3583
hco3[m]	Hydrogencarbonate	CH2O3	CHO3	-1	C00288	3583
hcya[c]	Hydrogen cyanide	CHN	CHN	0	C01326
hcys[c]	L-homocysteine	C4H9NO2S	C4H9NO2S	0	C00155	3455
hcys[m]	L-homocysteine	C4H9NO2S	C4H9NO2S	0	C00155	3455
hemea[m]	heme a	C49H56FeN4O6	C49H54FeN4O6	-2	C15670	4724997
hemeb[m]	heme b	C34H32FeN4O4	C34H30FeN4O4	-2	C00032	3334
hemeo[m]	heme o	C49H58FeN4O5	C49H56FeN4O5	-2	C15672	4724998
hicit[m]	homoisocitrate	C7H10O7	C7H7O7	-3	C05662	7972
his[c]	L-histidine	C6H9N3O2	C6H9N3O2	0	C00135	3435
his[e]	L-histidine	C6H9N3O2	C6H9N3O2	0	C00135	3435
hisan[c]	Histamine	C5H9N3	C5H10N3	1	C00388	3678
hisan[e]	Histamine	C5H9N3	C5H10N3	1	C00388	3678
hisol[c]	L-histidinol	C6H11N3O	C6H12N3O	1	C00860	4117
hisolp[c]	L-histidinol phosphate	C6H12N3O4P	C6H11N3O4P	-1	C01100	4334
hiura[c]	5-Hydroxyisourate	C5H4N4O4	C5H4N4O4	0	C11821	13985
hkyn[c]	3-Hydroxy-L-kynurenine	C10H12N2O4	C10H12N2O4	0	C03227	699
hkyn[m]	3-Hydroxy-L-kynurenine	C10H12N2O4	C10H12N2O4	0	C03227	699
hmgcoa[c]	(S)-3-hydroxy-3-methylglutaryl-CoA	C27H44N7O20P3S	C27H39N7O20P3S	-5	C00356	3649
hmgcoa[m]	(S)-3-hydroxy-3-methylglutaryl-CoA	C27H44N7O20P3S	C27H39N7O20P3S	-5	C00356	3649
hmtb[c]	hydroxymethylbilane	C40H46N4O17	C40H38N4O17	-8	C01024	4269
hno2[c]	nitrite	HNO2	NO2	-1	C00088	3388
hno3[c]	nitrate	HNO3	NO3	-1	C00244	3543
hno3[e]	nitrate	HNO3	NO3	-1	C00244	3543
homogen[c]	homogentisate	C8H8O4	C8H7O4	-1	C00544	3825
homogen[m]	homogentisate	C8H8O4	C8H7O4	-1	C00544	3825
houdhic[c]	5-Hydroxy-2-oxo-4-ureido-2,5-dihydro-1H-imidazole-5-carboxylate	C5H6N4O5	C5H5N4O5	-1	C12248	14393
hphea[m]	2-Hydroxyphenylacetate	C8H8O3	C8H7O3	-1	C05852	8145
hplys[m]	H-protein-lipoyllysine	C8H14NOS2R	C8H14NOS2R	0	C02051	514
hpro[c]	trans-4-hydroxy-L-proline	C5H9NO3	C5H9NO3	0	C01157	4385
hpsamlys[m]	S-Aminomethyldihydrolipoylprotein	C9H19N2OS2R	C9H19N2OS2R	0	C01242	4463
hser[c]	L-homoserine	C4H9NO3	C4H9NO3	0	C00263	3561
hthr[c]	4-Hydroxy-L-threonine	C4H9NO4	C4H9NO4	0	C06056
hygta[c]	S-(hydroxymethyl)glutathione	C11H19N3O7S	C11H18N3O7S	-1	C14180	7846992
hyisocoa[m]	(S)-3-Hydroxyisobutyryl-CoA	C25H42N7O18P3S	C25H38N7O18P3S	-4	C06000	8274
hyisorate[c]	(S)-3-Hydroxyisobutyrate	C4H8O3	C4H7O3	-1	C06001	4414
hyisorate[m]	(S)-3-Hydroxyisobutyrate	C4H8O3	C4H7O3	-1	C06001	4414
hyxn[c]	hypoxanthine	C5H4N4O	C5H4N4O	0	C00262	356
i3ad[c]	Indole-3-acetaldehyde	C10H9NO	C10H9NO	0	C00637	391
i4p[c]	Inositol 1,4,5,6-tetrakisphosphate	C6H16O18P4	C6H8O18P4	-8	C11555	13722
i5p[c]	Inositol 1,3,4,5,6-pentakisphosphate	C6H17O21P5	C6H7O21P5	-10	C01284	453
i5p2[e]	Inositol 1,2,4,5,6-pentakisphosphate	C6H17O21P5	C6H7O21P5	-10	C04563	7166
i6p[e]	Phytate;myo-Inositol hexakisphosphate	C6H18O24P6	C6H6O24P6	-12	C01204	4428
ia[c]	itaconic acid	C5H6O4	C5H4O4	-2	C00490	3773
ia[e]	itaconic acid	C5H6O4	C5H4O4	-2	C00490	3773
iaa[c]	indoleacetate	C10H9NO2	C10H8NO2	-1	C00954	425
iasp[c]	Iminoaspartat	C4H5NO4	C4H3NO4	-2	C05840	8133
ichor[c]	isochorismate	C10H10O6	C10H8O6	-2	C00885	4141
icit[c]	isocitrate	C6H8O7	C6H5O7	-3	C00311	365
icit[e]	isocitrate	C6H8O7	C6H5O7	-3	C00311	365
icit[m]	isocitrate	C6H8O7	C6H5O7	-3	C00311	365
idol[c]	L-iditol	C6H14O6	C6H14O6	0	C01507	4675
idol[e]	L-iditol	C6H14O6	C6H14O6	0	C01507	4675
idp[c]	Inosine diphosphate	C10H14N4O11P2	C10H12N4O11P2	-2	C00104
idp[m]	Inosine diphosphate	C10H14N4O11P2	C10H12N4O11P2	-2	C00104
igp[c]	1-(indol-3-yl)glycerol 3-phosphate	C11H14NO6P	C11H12NO6P	-2	C03506	6317
ile[c]	L-isoleucine	C6H13NO2	C6H13NO2	0	C00407	3697
ile[e]	L-isoleucine	C6H13NO2	C6H13NO2	0	C00407	3697
ile[m]	L-isoleucine	C6H13NO2	C6H13NO2	0	C00407	3697
imacp[c]	3-(imidazol-4-yl)-2-oxopropyl phosphate	C6H9N2O5P	C6H7N2O5P	-2	C01267	4486
imlt[c]	Isomaltose	C12H22O11	C12H22O11	0	C00252
imlt[e]	Isomaltose	C12H22O11	C12H22O11	0	C00252
imp[c]	IMP	C10H13N4O8P	C10H11N4O8P	-2	C00130	343
inos[c]	inosine	C10H12N4O5	C10H12N4O5	0	C00294	3588
ins[c]	myo-inositol	C6H12O6	C6H12O6	0	C00137	3437
ins[e]	myo-inositol	C6H12O6	C6H12O6	0	C00137	3437
ip4[c]	Inositol 4-phosphate	C6H13O9P	C6H11O9P	-2	C03546	6349
ippmal[m]	2-isopropylmalate	C7H12O5	C7H10O5	-2	C02504	5516
ippp[c]	isopentenyl diphosphate	C5H12O7P2	C5H10O7P2	-2	C00129	3429
ipyr[c]	Indolepyruvate	C11H9NO3	C11H8NO3	-1	C00331	3625
ipyr[m]	Indolepyruvate	C11H9NO3	C11H8NO3	-1	C00331	3625
isocoa[m]	Isobutyryl-CoA	C25H42N7O17P3S	C25H38N7O17P3S	-4	C00630
itp[c]	Inosine triphosphate	C10H15N4O14P3	C10H12N4O14P3	-3	C00081
itp[m]	Inosine triphosphate	C10H15N4O14P3	C10H12N4O14P3	-3	C00081
ivacoa[m]	3-isovaleryl-CoA	C26H44N7O17P3S	C26H40N7O17P3S	-4	C02939	5858
k[c]	potassium	K	K	1	C00238	3537
k[e]	potassium	K	K	1	C00238	3537
k[m]	potassium	K	K	1	C00238
kins[c]	2-keto-myo-inositol;2,4,6/3,5-Pentahydroxycyclohexanone	C6H10O6	C6H10O6	0	C00691	3959
kyn[c]	L-kynurenine	C10H12N2O3	C10H12N2O3	0	C00328	3622
kyn[m]	L-kynurenine	C10H12N2O3	C10H12N2O3	0	C00328	3622
lac[c]	(R)-lactate	C3H6O3	C3H5O3	-1	C00256	3555
lac[e]	(R)-lactate	C3H6O3	C3H5O3	-1	C00256	3555
lac[m]	(R)-lactate	C3H6O3	C3H5O3	-1	C00256	3555
lact[c]	lactose	C12H22O11	C12H22O11	0	C00243	3542
lact[e]	lactose	C12H22O11	C12H22O11	0	C00243	3542
laol[c]	L-arabinitol	C5H12O5	C5H12O5	0	C00532	3814
larab[c]	L-arabinose	C5H10O5	C5H10O5	0	C00259	3558
larab[e]	L-arabinose	C5H10O5	C5H10O5	0	C00259	3558
leu[c]	L-leucine	C6H13NO2	C6H13NO2	0	C00123	3423
leu[e]	L-leucine	C6H13NO2	C6H13NO2	0	C00123	3423
leu[m]	L-leucine	C6H13NO2	C6H13NO2	0	C00123	3423
lglutrna[c]	L-glutamyl-tRNA(Glu)	C25H36N6O19P2R2	C25H36N6O19P2R2	0	C02987	5896
lgt[c]	(R)-S-lactoylglutathione	C13H21N3O8S	C13H20N3O8S	-1	C03451	6272
llac[c]	(S)-lactate	C3H6O3	C3H5O3	-1	C00186	3486
llac[e]	(S)-lactate	C3H6O3	C3H5O3	-1	C00186	3486
llac[m]	(S)-lactate	C3H6O3	C3H5O3	-1	C00186	3486
llct[c]	L-cystathionine	C7H14N2O4S	C7H14N2O4S	0	C02291	5347
lnst[c]	lanosterol	C30H50O	C30H50O	0	C01724	4861
lovst[c]	lovastatin	C24H36O5	C24H36O5	0	C07074	9285
lpaa[c]	lysophosphatidylamine	R	R	0
lpc[c]	1-Lysophosphatidylcholine	C9H20NO7PR	C9H21NO7PR	1	C04233 C04230	692
lpdme[c]	lysophosphatidyl-N-dimethylethanolamine	R	R	0
lpe[c]	L-lysophosphatidylethanolamine	C6H13NO7PR	C6H13NO7PR	0	C04438	796
lpg[c]	L-lysophosphatidylethanolamine	C6H13NO7PR	C6H13NO7PR	0	C04438	796
lpmme[c]	lysophosphatidyl-N-methylethanolamine	R	R	0
lps[c]	lysophosphatidylserine	R	R	0
lrl5p[c]	L-ribulose 5-phosphate	C5H11O8P	C5H9O8P	-2	C01101	4335
lxul[c]	L-xylulose	C5H10O5	C5H10O5	0	C00312	366
lxul[e]	L-xylulose	C5H10O5	C5H10O5	0	C00312	366
lys[c]	L-lysine	C6H14N2O2	C6H15N2O2	1	C00047	3349
lys[e]	L-lysine	C6H14N2O2	C6H15N2O2	1	C00047	3349
lys[m]	L-lysine	C6H14N2O2	C6H15N2O2	1	C00047	3349
macac[c]	4-maleylacetoacetate	C8H8O6	C8H6O6	-2	C01036	4279
maclcoa[m]	Methacrylyl-CoA	C25H40N7O17P3S	C25H36N7O17P3S	-4	C03460
maclj[c]	monacoline J	C19H28O4	C19H28O4	0		13331
magly[c]	1-monoglycerides	C4H7O4R	C4H7O4R	0	C01885	4998
mal[c]	(S)-malate	C4H6O5	C4H4O5	-2	C00149	3449
mal[e]	(S)-malate	C4H6O5	C4H4O5	-2	C00149	3449
mal[m]	(S)-malate	C4H6O5	C4H4O5	-2	C00149	3449
malacp[c]	malonyl-[acp]	C3H3O3SR	C3H3O3SR	0	C01209	4431
malcoa[c]	malonyl-CoA	C24H38N7O19P3S	C24H33N7O19P3S	-5	C00083	3383
malcoa[m]	malonyl-CoA	C24H38N7O19P3S	C24H33N7O19P3S	-5	C00083	3383
man[c]	D-mannose	C6H12O6	C6H12O6	0	C00159	3459
man[e]	D-mannose	C6H12O6	C6H12O6	0	C00159	3459
man1p[c]	D-mannose 1-phosphate	C6H13O9P	C6H11O9P	-2	C00636	399
man6p[c]	D-mannose 6-phosphate	C6H13O9P	C6H11O9P	-2	C00275	3572
mannan[c]	mannans	C6H10O5	C6H10O5	0
mannan[e]	mannans	C6H10O5	C6H10O5	0
manoe[c]	D-mannonate	C6H12O7	C6H11O7	-1	C00514	3797
mbcoa[m]	2-Methylbutanoyl-CoA	C26H44N7O17P3S	C26H40N7O17P3S	-4	C15980 C01033	47205293 4276
mbtac[c]	2-Methylbutanoic acid	C5H10O2	C5H9O2	-1
mcecoa[m]	2-Methylacetoacetyl-CoA	C26H42N7O18P3S	C26H42N7O18P3S	-4	C03344	6187
mcrcoa[m]	3-Methylcrotonyl-CoA	C26H42N7O17P3S	C26H38N7O17P3S	-4	C03069
mcrocoa[m]	2-methylcrotonoyl-CoA	C26H42N7O17P3S	C26H38N7O17P3S	-4	C03345	6188
meli[c]	melibiose	C12H22O11	C12H22O11	0	C05402	7769
meli[e]	melibiose	C12H22O11	C12H22O11	0	C05402	7769
melt[e]	Melibiitol	C12H24O11	C12H24O11	0	C05399	7766
met[c]	L-methionine	C5H11NO2S	C5H11NO2S	0	C00073	3373
met[e]	L-methionine	C5H11NO2S	C5H11NO2S	0	C00073	3373
met[m]	L-methionine	C5H11NO2S	C5H11NO2S	0	C00073	3373
metbycoa[m]	(2S,3S)-3-Hydroxy-2-methylbutanoyl-CoA	C26H44N7O18P3S	C26H42N7O18P3S	0	C04405	7041
meth[c]	methanol	CH4O	CH4O	0	C00132	3432
meth[e]	methanol	CH4O	CH4O	0	C00132	3432
meth[m]	methanol	CH4O	CH4O	0	C00132	3432
methf[c]	5,10-methenyltetrahydrofolate	C20H21N7O6	C20H20N7O6	-1	C00445	3733
methf[m]	5,10-methenyltetrahydrofolate	C20H21N7O6	C20H20N7O6	-1	C00445	3733
metso[c]	L-Methionine S-oxide	C5H11NO3S	C5H11NO3S	0	C02989
metthf[c]	5,10-methylenetetrahydrofolate	C20H23N7O6	C20H21N7O6	-2	C00143	3443
metthf[m]	5,10-methylenetetrahydrofolate	C20H23N7O6	C20H21N7O6	-2	C00143	3443
mgcoa[m]	trans-3-methylglutaconyl-CoA	C27H42N7O19P3S	C27H37N7O19P3S	-5	C03231	612
mgxl[c]	methylglyoxal	C3H4O2	C3H4O2	0	C00546	3827
mgxl[m]	methylglyoxal	C3H4O2	C3H4O2	0	C00546	3827
mhis[c]	1-Methylhistidine	C7H11N3O2	C7H11N3O2	0	C01152	4381
mi3p[c]	1D-myo-inositol 3-phosphate	C6H13O9P	C6H11O9P	-2	C04006	6716
mip2c[c]	inositol-mannose-P-inositol-P-D-ceramide	C62H121NO26P2	C62H119NO26P2	-2		252165
mipc[c]	mannose-inositol-P-ceramide	C56H110NO18P	C56H109NO18P	-1		25236
mlcl[c]	Monolysocardiolipin	C12H19O16P2R3	C12H17O16P2R3	-2	C18129	9624346
mlcl[m]	Monolysocardiolipin	C12H19O16P2R3	C12H17O16P2R3	-2	C18129	9624346
mlt[c]	maltose	C12H22O11	C12H22O11	0	C00208	358
mlt[e]	maltose	C12H22O11	C12H22O11	0	C00208	358
mltiose[c]	maltotriose	C18H32O16	C18H32O16	0	C01835	4954
mltose[c]	maltotetraose	C24H42O21	C24H42O21	0	C02052	5141
mmshy[c]	(S)-Methylmalonate semialdehyde	C4H6O3	C4H5O3	-1	C06002	8276
mmshy[m]	3-oxo-2-methylpropanoate	C4H6O3	C4H5O3	-1	C00349
mnt[c]	D-mannitol	C6H14O6	C6H14O6	0	C00392	3682
mnt[e]	D-mannitol	C6H14O6	C6H14O6	0	C00392	3682
mnt1p[c]	D-mannitol 1-phosphate	C6H15O9P	C6H13O9P	-2	C00644	3917
mob[c]	4-Methylthio-2-oxobutanoate	C5H8O3S	C5H7O3S	-1	C01180	447
mob[m]	4-Methylthio-2-oxobutanoate	C5H8O3S	C5H7O3S	-1	C01180	447
mpyq[m]	2-Methyl-6-phytylquinol	C27H46O2	C27H46O2	0	C15882	472522
mpyr[c]	Maleylpyruvate	C7H6O6	C7H4O6	-2	C02167
mrlac[c]	3-Mercaptolactate	C3H6O3S	C3H5O3S	-1	C05823
mrpyr[c]	Mercaptopyruvate	C3H4O3S	C3H3O3S	-1	C00957
msali[c]	6-methysalicylate acid	C8H8O3	C8H7O3	-1	C02657	563
mseth[c]	methanethiol	CH4S	CH4S	0	C00409	3699
mta[c]	5'-Methylthioadenosine	C11H15N5O3S	C11H15N5O3S	0	C00170	347
mthf[c]	5-methyltetrahydrofolate	C20H25N7O6	C20H23N7O6	-2	C00440	3729
mthf[m]	5-methyltetrahydrofolate	C20H25N7O6	C20H23N7O6	-2	C00440	3729
mtprop[c]	3-Methylthiopropionate	C4H8O2S	C4H7O2S	-1	C08276
mtrip[c]	S-Methyl-5-thio-D-ribose 1-phosphate	C6H13O7PS	C6H11O7PS	-2	C04188
muc[c]	cis,cis-Muconate	C6H6O4	x	0	C02480
mvl[c]	(R)-mevalonate	C6H12O4	C6H11O4	-1	C00418	378
myobpi[c]	1D-myo-inositol 1,4-bisphosphate	C6H14O12P2	C6H10O12P2	-4	C01220	4442
myocypi[c]	1D-myo-inositol 1,2-cyclic phosphate	C6H11O8P	C6H10O8P	-1	C04299	6958
mzymst[c]	4alpha-methylzymosterol	C28H46O	C28H46O	0	C05103	7531
n4hbz[m]	4-hydroxy-3-octaprenylbenzoate	C12H14O3(C5H8)n	C12H14O3(C5H8)n	0	C05848	8141
na[c]	sodium	Na	Na	1	C01330	4541
na[e]	sodium	Na	Na	1	C01330	4541
na[m]	sodium	Na	Na	1	C01330	4541
nad[c]	Nicotinamide adenine dinucleotide	C21H27N7O14P2	C21H26N7O14P2	-1	C00003	335
nad[e]	Nicotinamide adenine dinucleotide	C21H27N7O14P2	C21H26N7O14P2	-1	C00003	335
nad[m]	Nicotinamide adenine dinucleotide	C21H27N7O14P2	C21H26N7O14P2	-1	C00003	335
nadgpis[c]	N-Acetyl-D-glucosaminylphosphatidylinositol	C19H30NO18PR2	C19H30NO18PR2	0	C01288
nadh[c]	Reduced nicotinamide adenine dinucleotide	C21H29N7O14P2	C21H27N7O14P2	-2	C00004	336
nadh[e]	Reduced nicotinamide adenine dinucleotide	C21H29N7O14P2	C21H27N7O14P2	-2	C00004	336
nadh[m]	Reduced nicotinamide adenine dinucleotide	C21H29N7O14P2	C21H27N7O14P2	-2	C00004	336
nadp[c]	Nicotinamide adenine dinucleotide phosphate	C21H28N7O17P3	C21H25N7O17P3	-3	C00006	338
nadp[m]	Nicotinamide adenine dinucleotide phosphate	C21H28N7O17P3	C21H25N7O17P3	-3	C00006	338
nadph[c]	Reduced nicotinamide adenine dinucleotide phosphate	C21H30N7O17P3	C21H26N7O17P3	-4	C00005	337
nadph[m]	Reduced nicotinamide adenine dinucleotide phosphate	C21H30N7O17P3	C21H26N7O17P3	-4	C00005	337
nag[c]	N-acetyl-D-glucosamine	C8H15NO6	C8H15NO6	0	C00140	344
nag[e]	N-acetyl-D-glucosamine	C8H15NO6	C8H15NO6	0	C00140	344
nag6p[c]	N-acetyl-D-glucosamine 6-phosphate	C8H16NO9P	C8H14NO9P	-2	C00357	365
nag6p[m]	N-acetyl-D-glucosamine 6-phosphate	C8H16NO9P	C8H14NO9P	-2	C00357	365
naga1p[c]	N-acetyl-D-glucosamine 1-phosphate	C8H16NO9P	C8H14NO9P	-2	C04256	6921
naglu[m]	N-acetyl-L-glutamate	C7H11NO5	C7H9NO5	-2	C00624	3897
naglup[m]	N-acetyl-L-gamma-glutamyl phosphate	C7H12NO8P	C7H9NO8P	-3	C04133	6819
naglus[m]	N-acetyl-L-glutamate 5-semialdehyde	C7H11NO4	C7H10NO4	-1	C01250	447
naorn[m]	N2-acetyl-L-ornithine	C7H14N2O3	C7H14N2O3	0	C00437	3726
naps[c]	N-acetylputrescine	C6H14N2O	C6H15N2O	1	C02714	5677
nar[c]	nicotinate D-ribonucleoside	C11H13NO6	C11H13NO6	0	C05841	8134
ncapsc[c]	N-Carbamoylputrescine	C5H13N3O	C5H14N3O	1	C00436	3725
ncn[c]	nicotinate D-ribonucleotide	C11H14NO9P	C11H12NO9P	-2	C01185	4411
nh3[c]	Ammonia	H3N	H4N	1	C00014	3316
nh3[e]	Ammonia	H3N	H4N	1	C00014	3316
nh3[m]	Ammonia	H3N	H4N	1	C00014	3316
nh4oh[c]	ammonium hydroxide	H5NO	H6NO	1	C01358	4561
nica[c]	nicotinate	C6H5NO2	C6H4NO2	-1	C00253	3552
nicd[c]	nicotinamide	C6H6N2O	C6H6N2O	0	C00153	3453
nmn[c]	Nicotinamide D-ribonucleotide	C11H15N2O8P	C11H14N2O8P	-1	C00455	3741
nnr[c]	Nicotinamide D-ribonucleoside;Nicotinamide-beta-riboside	C11H14N2O5	C11H15N2O5	1	C03150	638
nor[c]	norsolorinic acid	C20H18O7	C20H17O7	-1		2521337
npp[m]	octaprenyl diphosphate	C40H68O7P2	C40H66O7P2	-2	C04146	6831
npran[c]	N-(5-phospho-D-ribosyl)anthranilate	C12H16NO9P	C12H13NO9P	-3	C04302	6831
o2[c]	oxygen	O2	O2	0	C00007	339
o2[e]	oxygen	O2	O2	0	C00007	339
o2[m]	oxygen	O2	O2	0	C00007	339
oa[c]	oxaloacetate	C4H4O5	C4H2O5	-2	C00036	3338
oa[e]	oxaloacetate	C4H4O5	C4H2O5	-2	C00036	3338
oa[m]	oxaloacetate	C4H4O5	C4H2O5	-2	C00036	3338
oahser[c]	O-acetyl-L-homoserine	C6H11NO4	C6H11NO4	0	C01077	4315
oaser[c]	O-acetyl-L-serine	C5H9NO4	C5H9NO4	0	C00979	4228
obut[c]	2-oxobutanoate	C4H6O3	C4H5O3	-1	C00109	349
obut[m]	2-oxobutanoate	C4H6O3	C4H5O3	-1	C00109	349
ohpbt[c]	2-Oxo-3-hydroxy-4-phosphobutanoate	C4H7O8P	C4H4O8P	-3	C06054
ohphl[m]	2-Octaprenyl-6-hydroxyphenol	C46H70O2	C46H70O2	0	C05811	816
oicap[c]	(2S)-2-isopropyl-3-oxosuccinate	C7H10O5	C7H8O5	-2	C04236	695
oicap[m]	(2S)-2-isopropyl-3-oxosuccinate	C7H10O5	C7H8O5	-2	C04236	695
oival[c]	2-Oxoisovalerate;(R)-3-methyl-2-oxobutanoate	C5H8O3	C5H7O3	-1	C00141	3441
oival[m]	2-Oxoisovalerate;(R)-3-methyl-3-oxobutanoate	C5H8O3	C5H7O3	-1	C00141	3441
om[m]	6-methoxy-2-octaprenylphenol	C47H72O2	C47H72O2	0	C05812	817
omb[m]	6-methoxy-2-octaprenyl-1,4-benzoquinone	C47H70O3	C47H70O3	0	C05813	818
omhmb[m]	3-demethylubiquinone-8	C48H72O4	C48H72O4	0	C05815	811
ommb[m]	3-methyl-6-methoxy-2-octaprenyl-1,4-benzoquinone	C48H72O3	C48H72O3	0	C05814	819
omp[c]	orotidine 5'-phosphate	C10H13N2O11P	C10H10N2O11P	-3	C01103	4337
omst[c]	7-O-methylsterigmatocystin	C19H14O6	C19H14O6	0	C03686	6461
omval[c]	(S)-3-Methyl-2-oxopentanoate	C6H10O3	C6H9O3	-1	C00671	394
omval[m]	(S)-3-Methyl-2-oxopentanoate	C6H10O3	C6H9O3	-1	C00671	394
oppa[m]	3-oxopropanoate;Malonate semialdehyde	C3H4O3	C3H3O3	-1	C00222	3522
orn[c]	L-ornithine	C5H12N2O2	C5H13N2O2	1	C00077	3377
orn[m]	L-ornithine	C5H12N2O2	C5H13N2O2	1	C00077	3377
oroa[c]	orotate	C5H4N2O4	C5H3N2O4	-1	C00295	3589
osuhs[c]	O-Succinyl-L-homoserine	C8H13NO6	C8H11NO6	-1	C01118
ota[c]	ochratoxin A	C20H18ClNO6	C20H17ClNO6	-1	C09955	12141
ota[e]	ochratoxin A	C20H18ClNO6	C20H17ClNO6	-1	C09955	12141
othio[c]	thioredoxin disulfide	C10H12N4O4S2R4	C10H12N4O4S2R4	0	C00343	3636
oxal[c]	oxalate	C2H2O4	C2O4	-2	C00209	359
oxal[e]	oxalate	C2H2O4	C2O4	-2	C00209	359
p5c[c]	(S)-1-pyrroline-5-carboxylate	C5H7NO2	C5H6NO2	-1	C03912	6642
p5c[m]	(S)-1-pyrroline-5-carboxylate	C5H7NO2	C5H6NO2	-1	C03912	6642
pa[c]	phosphatidate	C5H7O8PR2	C5H7O8PR2	0	C00416	376
pa[m]	phosphatidate	C5H7O8PR2	C5H7O8PR2	0	C00416	376
paa[c]	phosphatidylamine	C5H11O8NPR2	C5H11O8NPR2	0
pac[m]	phenylacetate	C8H8O2	C8H7O2	-1	C07086	9297
pad[m]	2-phenylacetamide	C8H9NO	C8H9NO	0	C02505	5517
pant[c]	(R)-pantoate	C6H12O4	C6H11O4	-1	C00522	385
pant[m]	(R)-pantoate	C6H12O4	C6H11O4	-1	C00522	385
pap[c]	adenosine 3',5'-bisphosphate	C10H15N5O10P2	C10H11N5O10P2	-4	C00054	3356
pap[m]	adenosine 3',5'-bisphosphate	C10H15N5O10P2	C10H11N5O10P2	-4	C00054	3356
papce[c]	3,4-Dihydroxybenzoate	C7H6O4	C7H5O4	-1	C00230	3529
papce[e]	3,4-Dihydroxybenzoate	C7H6O4	C7H5O4	-1	C00230	3529
paps[c]	3'-phospho-5'-adenylyl sulfate	C10H15N5O13P2S	C10H11N5O13P2S	-4	C00053	3355
pc[c]	phosphatidylcholines	C10H18NO8PR2	C10H18NO8PR2	0	C00157	3457
pc[e]	phosphatidylcholines	C10H18NO8PR2	C10H18NO8PR2	0	C00157	3457
pcace[c]	3,4-dihydroxybenzoate	C7H6O4	C7H5O4	-1	C00230	3529
pcer2[c]	phytoceramides	C19H38NO4R	C19H38NO4R	0	C12145	14292
pcer2[e]	phytoceramides	C19H38NO4R	C19H38NO4R	0	C12145	14292
pcln[c]	choline phosphate	C5H14NO4P	C5H13NO4P	-1	C00588	3867
pcln[e]	choline phosphate	C5H14NO4P	C5H13NO4P	-1	C00588	3867
pcln[m]	choline phosphate	C5H14NO4P	C5H13NO4P	-1	C00588	3867
pcpmme[c]	phosphatidyl-N-methylethanolamines	C8H14NO8PR2	C8H14NO8PR2	0	C01241	4462
pdme[c]	phosphatidyl-N-dimethylethanolamine	C9H16NO8PR2	C9H15NO8PR2	-1	C04308	6966
pdxal[c]	pyridoxal	C8H9NO3	C8H9NO3	0	C00250	3549
pdxam[c]	pyridoxamine	C8H12N2O2	C8H13N2O2	1	C00534	3816
pdxam5pi[c]	pyridoxamine 5'-phosphate	C8H13N2O5P	C8H12N2O5P	-1	C00647	3919
pdxi[c]	pyridoxine	C8H11NO3	C8H11NO3	0	C00314	368
pdxi5pi[c]	pyridoxine 5'-phosphate	C8H12NO6P	C8H10NO6P	-2	C00627	39
pe[c]	phosphatidylethanolamines	C7H12NO8PR2	C7H12NO8PR2	0	C00350	3643
pe[e]	phosphatidylethanolamines	C7H12NO8PR2	C7H12NO8PR2	0	C00350	3643
pe[m]	phosphatidylethanolamines	C7H12NO8PR2	C7H12NO8PR2	0	C00350	3643
pea[c]	ethanolamine phosphate	C2H8NO4P	C2H7NO4P	-1	C00346	3639
pea[e]	ethanolamine phosphate	C2H8NO4P	C2H7NO4P	-1	C00346	3639
pep[c]	phosphoenolpyruvate	C3H5O6P	C3H2O6P	-3	C00074	3374
pep[m]	phosphoenolpyruvate	C3H5O6P	C3H2O6P	-3	C00074	3374
pg[c]	phosphatidylglycerol	C8H13O10PR2	C8H13O10PR2	0	C00344	3637
pg[m]	phosphatidylglycerol	C8H13O10PR2	C8H13O10PR2	0	C00344	3637
pglya[c]	2-Phosphoglycolate	C2H5O6P	C2H2O6P	-3	C00988	4234
pgp[m]	Phosphatidylglycerophosphate	C8H14O13P2R2	C8H11O13P2R2	-3	C03892	6624
phal[c]	phenylacetaldehyde	C8H8O	C8H8O	0	C00601	3876
phal[m]	phenylacetaldehyde	C8H8O	C8H8O	0	C00601	3876
phc[c]	L-1-pyrroline-3-hydroxy-5-carboxylate	C5H7NO3	C5H6NO3	-1	C04281	6943
phe[c]	L-phenylalanine	C9H11NO2	C9H11NO2	0	C00079	3379
phe[e]	L-phenylalanine	C9H11NO2	C9H11NO2	0	C00079	3379
phe[m]	L-phenylalanine	C9H11NO2	C9H11NO2	0	C00079	3379
phem[c]	Phenethylamine	C8H11N	C8H12N	1	C05332	7711
phen[c]	prephenate	C10H10O6	C10H8O6	-2	C00254	3553
php[c]	3-phosphonooxypyruvate	C3H5O7P	C3H2O7P	-3	C03232	613
phser[c]	O-phospho-L-homoserine	C4H10NO6P	C4H8NO6P	-2	C01102	4336
phsp[c]	phytosphingosine 1-phosphate	C18H40NO6P	C18H39NO6P	-1
pht[c]	O-Phospho-4-hydroxy-L-threonine	C4H10NO7P	C4H8NO7P	-2	C06055
pi[c]	phosphate	H3O4P	HO4P	-2	C00009	3311
pi[e]	phosphate	H3O4P	HO4P	-2	C00009	3311
pi[m]	phosphate	H3O4P	HO4P	-2	C00009	3311
pins[c]	1-phosphatidyl-1D-myo-inositols	C11H17O13PR2	C11H17O13PR2	0	C01194	4419
pins4p[c]	1-phosphatidyl-1D-myo-inositol 4-phosphates	C11H18O16P2R2	C11H18O16P2R2	0	C01277	4496
pinsp[c]	1-phosphatidyl-1D-myo-inositol 3-phosphates	C11H18O16P2R2	C11H18O16P2R2	0	C04549	7155
plp[c]	pyridoxal 5'-phosphate	C8H10NO6P	C8H8NO6P	-2	C00018	332
pmme[c]	phosphatidyl-N-methylethanolamines	C8H14NO8PR2	C8H13NO8PR2	-1	C01241	4462
pmvl[c]	(R)-5-phosphomevalonate	C6H13O7P	C6H10O7P	-3	C01107	4339
pnto[c]	(R)-pantothenate	C9H17NO5	C9H16NO5	-1	C00864	4121
pnto[e]	(R)-pantothenate	C9H17NO5	C9H16NO5	-1	C00864	4121
ppacoa[c]	propionyl-CoA	C24H40N7O17P3S	C24H36N7O17P3S	-4	C00100	34
ppacoa[m]	propionyl-CoA	C24H40N7O17P3S	C24H36N7O17P3S	-4	C00100	34
ppbg[c]	porphobilinogen	C10H14N2O4	C10H13N2O4	-1	C00931	4184
ppgix[m]	protoporphyrinogen	C34H40N4O4	C34H38N4O4	-2	C01079	4317
ppi[c]	diphosphate	H4O7P2	HO7P2	-3	C00013	3315
ppi[m]	diphosphate	H4O7P2	HO7P2	-3	C00013	3315
ppiacp[c]	propionyl-[acp]	C3H5OSR	C3H5OSR	0
ppmvl[c]	(R)-5-diphosphomevalonate	C6H14O10P2	C6H11O10P2	-3	C01143	4374
ppnto[c]	D-4'-Phosphopantothenate	C9H18NO8P	C9H15NO8P	-3	C03492	634
ppntocys[c]	(R)-4'-Phosphopantothenoyl-L-cysteine	C12H23N2O9PS	C12H20N2O9PS	-3	C04352	71
pprix[m]	protoporphyrin	C34H34N4O4	C34H32N4O4	-2	C02191	5261
ppthe[c]	Phosphopantetheine	C11H23N2O7PS	C11H21N2O7PS	-2	C01134	4365
ppyr[c]	Phenylpyruvate	C9H8O3	C9H7O3	-1	C00166	3466
ppyr[m]	Phenylpyruvate	C9H8O3	C9H7O3	-1	C00166	3466
pram[c]	5-phospho-D-ribosylamine	C5H12NO7P	C5H11NO7P	-1	C03090	5988
prbamp[c]	phosphoribosyl-AMP	C15H23N5O14P2	C15H19N5O14P2	-4	C02741	571
prbatp[c]	1-(5-phospho-D-ribosyl)-ATP	C15H25N5O20P4	C15H20N5O20P4	-5	C02739	5699
precor[c]	precorrins	C42H48N4O16	C42H41N4O16	-7	C02463	548
prfica[c]	5-formamido-1-(5-phospho-D-ribosyl)imidazole-4-carboxamide	C10H15N4O9P	C10H13N4O9P	-2	C04734	735
prfp[c]	1-(5-phospho-D-ribosyl)-5-[(5-phospho-D-ribosylamino)methylideneamino]imidazole-4-carboxamide	C15H25N5O15P2	C15H21N5O15P2	-4	C04896	7447
prlp[c]	5-[(5-phospho-1-deoxy-D-ribulos-1-ylamino)methylideneamino]-1-(5-phospho-D-ribosyl)imidazole-4-carboxamide	C15H25N5O15P2	C15H22N5O15P2	-3	C04916	7464
pro[c]	L-proline	C5H9NO2	C5H9NO2	0	C00148	3448
pro[e]	L-proline	C5H9NO2	C5H9NO2	0	C00148	3448
pro[m]	L-proline	C5H9NO2	C5H9NO2	0	C00148	3448
prpp[c]	5-phospho-alpha-D-ribose 1-diphosphate	C5H13O14P3	C5H9O14P3	-4	C00119	3419
ps[c]	phosphatidylserine	C8H12NO10PR2	C8H12NO10PR2	0	C02737	5698
ps[m]	phosphatidylserine	C8H12NO10PR2	C8H12NO10PR2	0	C02737	5698
psph[c]	phytosphingosine	C18H39NO3	C18H40NO3	1	C12144	14291
psph[e]	phytosphingosine	C18H39NO3	C18H40NO3	1	C12144	14291
ptate[e]	pectate	(C6H8O7)n	C6H8O7	0	C00470	3753
ptrsc[c]	putrescine	C4H12N2	C4H14N2	2	C00134	3434
ptrsc[m]	putrescine	C4H12N2	C4H14N2	2	C00134	3434
pvd3[c]	Provitamin D3	C27H44O	C27H44O	0	C01164	4391
pyi35bp[c]	1-Phosphatidyl-1D-myo-inositol 3,5-bisphosphate	C11H24O19P3R2	C11H19O19P3R2	-5	C11556	13723
pypp[m]	Phytyl diphosphate	C20H42O7P2	C20H40O7P2	-2	C05427	7791
pyr[c]	pyruvate	C3H4O3	C3H3O3	-1	C00022	3324
pyr[e]	pyruvate	C3H4O3	C3H3O3	-1	C00022	3324
pyr[m]	pyruvate	C3H4O3	C3H3O3	-1	C00022	3324
q[m]	ubiquinone	C19H26O4	C19H26O4	0	C00399	3689
qa[c]	quinolinate	C7H5NO4	C7H3NO4	-2	C03722	6487
qh2[m]	ubiquinol	C19H28O4	C19H28O4	0	C00390	368
qt[c]	quinate	C7H12O6	C7H11O6	-1	C00296	359
qt[e]	quinate	C7H12O6	C7H11O6	-1	C00296	359
r1p[c]	D-ribose 1-phosphate	C5H11O8P	C5H9O8P	-2	C00620	3894
r5p[c]	D-ribose 5-phosphate	C5H11O8P	C5H9O8P	-2	C00117	3417
raff[e]	raffinose	C18H32O16	C18H32O16	0	C00492	3775
rib[c]	D-ribose	C5H10O5	C5H10O5	0	C00121	3421
rib[e]	D-ribose	C5H10O5	C5H10O5	0	C00121	3421
ribol[c]	ribitol	C5H12O5	C5H12O5	0	C00474	3757
rl[c]	D-ribulose	C5H10O5	C5H10O5	0	C00309	363
rl[e]	D-ribulose	C5H10O5	C5H10O5	0	C00309	363
rl5p[c]	D-ribulose 5-phosphate	C5H11O8P	C5H9O8P	-2	C00199	3499
rthio[c]	Thioredoxin	C10H14N4O4S2R4	C10H14N4O4S2R4	0	C00342	3635
s[c]	sulfur	S	S	0	C00087	3387
s[m]	sulfur	S	S	0	C00087	3387
s23e[c]	(S)-2,3-epoxysqualene	C30H50O	C30H50O	0	C01054	4295
s7p[c]	sedoheptulose 7-phosphate	C7H15O10P	C7H13O10P	-2	C05382	7756
sacp[m]	L-saccharopine	C11H20N2O6	C11H19N2O6	-1	C00449	3737
sah[c]	S-adenosyl-L-homocysteine	C14H20N6O5S	C14H20N6O5S	0	C00021	3323
sah[m]	S-adenosyl-L-homocysteine	C14H20N6O5S	C14H20N6O5S	0	C00021	3323
saicar[c]	(2S)-2-[5-amino-1-(5-phospho-beta-D-ribosyl)imidazole-4-carboxamido]succinic acid	C13H19N4O12P	C13H15N4O12P	-4	C04823	7384
sali[c]	salicylate	C7H6O3	C7H5O3	-1	C00805	463
sali[e]	salicylate	C7H6O3	C7H5O3	-1	C00805	463
sam[c]	S-adenosyl-L-methionine	C15H22N6O5S	C15H23N6O5S	1	C00019	3321
sam[m]	S-adenosyl-L-methionine	C15H22N6O5S	C15H23N6O5S	1	C00019	3321
samob[c]	S-adenosyl-4-methylthio-2-oxobutanoate	C15H19N5O6S	C15H19N5O6S	0	C04425	757
samob[m]	S-adenosyl-4-methylthio-2-oxobutanoate	C15H19N5O6S	C15H19N5O6S	0	C04425	757
sarc[m]	sarcosine	C3H7NO2	C3H7NO2	0	C00213	3513
satn[c]	(S)-Allantoin	C4H6N4O3	C4H5N4O3	-1	C02350	5397
satn[e]	(S)-Allantoin	C4H6N4O3	C4H5N4O3	-1	C02350	5397
scysn[c]	S-Sulfo-L-cysteine	C3H7NO5S2	C3H6NO5S2	-1	C05824
ser[c]	L-serine	C3H7NO3	C3H7NO3	0	C00065	3365
ser[e]	L-serine	C3H7NO3	C3H7NO3	0	C00065	3365
shcr[c]	sirohydrochlorin	C42H46N4O16	C42H38N4O16	-8	C05778	873
sihm[c]	siroheme	C42H44FeN4O16	C42H36FeN4O16	-8	C00748	41
sihm[e]	siroheme	C42H44FeN4O16	C42H36FeN4O16	-8	C00748	41
slf[c]	sulfate	H2O4S	O4S	-2	C00059	3359
slf[e]	sulfate	H2O4S	O4S	-2	C00059	3359
slfi[c]	sulfite	H2O3S	HO3S	-1	C00094	3394
slfi[e]	sulfite	H2O3S	HO3S	-1	C00094	3394
slpyr[c]	3-Sulfopyruvate	C3H4O6S	C3H2O6S	-2	C05528
sme[c]	shikimate	C7H10O5	C7H9O5	-1	C00493	3776
sme3p[c]	shikimate 3-phosphate	C7H11O8P	C7H8O8P	-3	C03175	657
sor[c]	L-sorbose	C6H12O6	C6H12O6	0	C00247	3546
sor[e]	L-sorbose	C6H12O6	C6H12O6	0	C00247	3546
sot[c]	D-sorbitol	C6H14O6	C6H14O6	0	C00794	452
sot[e]	D-sorbitol	C6H14O6	C6H14O6	0	C00794	452
spere[c]	Spermine	C10H26N4	C10H30N4	4	C00750	412
spere[e]	Spermine	C10H26N4	C10H30N4	4	C00750	412
sph[c]	sphinganine	C18H39NO2	C18H40NO2	1	C00836	494
sphe[c]	Sphingenine	C18H37NO2	C18H38NO2	1	C00319	3613
sphe[e]	Sphingenine	C18H37NO2	C18H38NO2	1	C00319	3613
sphep[c]	Sphingosine 1-phosphate	C18H38NO5P	C18H37NO5P	-1	C06124	8381
sphep[e]	Sphingosine 1-phosphate	C18H38NO5P	C18H37NO5P	-1	C06124	8381
spmylin[e]	Sphingomyelin	C24H48N2O6PR	C24H49N2O6PR	1	C00550	3831
sprmd[c]	spermidine	C7H19N3	C7H22N3	3	C00315	369
sprmd[e]	spermidine	C7H19N3	C7H22N3	3	C00315	369
sql[c]	Squalene	C30H50	C30H50	0	C00751	413
st[c]	sterigmatocystin	C18H12O6	C18H12O6	0	C00961	4212
stac[e]	stachyose	C24H42O21	C24H42O21	0	C01613	4765
star[c]	starch	C6H10O5	C6H10O5	0	C00369	3659
star[e]	starch	C6H10O5	C6H10O5	0	C00369	3659
suc[e]	sucrose	C12H22O11	C12H22O11	0	C00089	3389
succ[c]	succinate	C4H6O4	C4H4O4	-2	C00042	3344
succ[e]	succinate	C4H6O4	C4H4O4	-2	C00042	3344
succ[m]	succinate	C4H6O4	C4H4O4	-2	C00042	3344
succoa[m]	succinyl-CoA	C25H40N7O19P3S	C25H35N7O19P3S	-5	C00091	3391
succsal[m]	succinate semialdehyde	C4H6O3	C4H5O3	-1	C00232	3531
suft[c]	Sulfatide	C25H46NO11SR	C25H46NO11SR	0	C06125	8382
t3p1[c]	D-glyceraldehyde 3-phosphate	C3H7O6P	C3H5O6P	-2	C00118	3418
t3p2[c]	glycerone phosphate	C3H7O6P	C3H5O6P	-2	C00111	3411
t3p2[m]	glycerone phosphate	C3H7O6P	C3H5O6P	-2	C00111	3411
tagly[c]	triglycerides	C6H5O6R3	C6H5O6R3	0	C00422	3712
taur[c]	taurine	C2H7NO3S	C2H7NO3S	0	C00245	3544
tcysn[c]	thiocysteine	C3H7NO2S2	C3H7NO2S2	0	C01962
tgdmipc[c]	Trigalactosyldimannosylinositol-P-ceramide	C80H150NO38P	C80H149NO38P	-1
thdp[c]	thiamin diphosphate	C12H18N4O7P2S	C12H17N4O7P2S	-1	C00068	5431
thf[c]	tetrahydrofolate	C19H23N7O6	C19H21N7O6	-2	C00101	341
thf[m]	tetrahydrofolate	C19H23N7O6	C19H21N7O6	-2	C00101	341
thm[c]	thiamin	C12H16N4OS	C12H17N4OS	1	C00378	3668
thmp[c]	thiamin monophosphate	C12H17N4O4PS	C12H16N4O4PS	-1	C01081	4319
thr[c]	L-threonine	C4H9NO3	C4H9NO3	0	C00188	3488
thr[e]	L-threonine	C4H9NO3	C4H9NO3	0	C00188	3488
thr[m]	L-threonine	C4H9NO3	C4H9NO3	0	C00188	3488
thtp[c]	Thiamin triphosphate	C12H19N4O10P3S	C12H17N4O10P3S	-2	C03028	5933
thy[c]	thymine	C5H6N2O2	C5H6N2O2	0	C00178	3478
thz[c]	5-(2-hydroxyethyl)-4-methylthiazole	C6H9NOS	C6H9NOS	0	C04294	6954
thzp[c]	4-methyl-5-(2-phosphonooxyethyl)thiazole	C6H10NO4PS	C6H8NO4PS	-2	C04327	698
top[c]	Toxopyrimidine	C6H9N3O	C6H9N3O	0	C01279	4498
tpi[c]	1D-myo-inositol 1,4,5-trisphosphate	C6H15O15P3	C6H9O15P3	-6	C01245	4466
tre[c]	alpha,alpha-trehalose	C12H22O11	C12H22O11	0	C01083	432
tre[e]	alpha,alpha-trehalose	C12H22O11	C12H22O11	0	C01083	432
tre6p[c]	alpha,alpha'-trehalose 6-phosphate	C12H23O14P	C12H21O14P	-2	C00689	3958
trp[c]	L-tryptophan	C11H12N2O2	C11H12N2O2	0	C00078	3378
trp[e]	L-tryptophan	C11H12N2O2	C11H12N2O2	0	C00078	3378
trp[m]	L-tryptophan	C11H12N2O2	C11H12N2O2	0	C00078	3378
trpm[c]	tryptamine	C10H12N2	C10H13N2	1	C00398	3688
tsulf[c]	Thiosulfate	H2O3S2	HO3S2	-1	C00320
tyr[c]	L-tyrosine	C9H11NO3	C9H11NO3	0	C00082	3382
tyr[e]	L-tyrosine	C9H11NO3	C9H11NO3	0	C00082	3382
udp[c]	Uridine 5'-diphosphate	C9H14N2O12P2	C9H12N2O12P2	-2	C00015	3317
udpg[c]	UDP-glucose	C15H24N2O17P2	C15H22N2O17P2	-2	C00029	3331
udpgal[c]	UDP-D-galactose	C15H24N2O17P2	C15H22N2O17P2	-2	C00052	3354
udpge[c]	UDP-D-glucuronate	C15H22N2O18P2	C15H19N2O18P2	-3	C00167	3467
udpnag[c]	UDP-N-acetyl-D-glucosamine	C17H27N3O17P2	C17H25N3O17P2	-2	C00043	3345
uglx[c]	(S)-Ureidoglycolate	C3H6N2O4	C3H5N2O4	-1	C00603	3878
ugly[c]	(S)-Ureidoglycine	C3H7N3O3	C3H7N3O3	0	C02091	5176
uibut[c]	3-Ureidoisobutyrate	C5H10N2O3	C5H9N2O3	-1	C05100	7529
ump[c]	Uridine 5'-monophosphate	C9H13N2O9P	C9H11N2O9P	-2	C00105	345
upgi[c]	Uroporphyrinogen I	C40H44N4O16	C40H44N4O16	0	C05766
upgiii[c]	uroporphyrinogen III	C40H44N4O16	C40H36N4O16	-8	C01051	4293
upgiii[m]	Uroporphyrinogen III	C40H44N4O16	C40H44N4O16	0	C01051
uppe[c]	3-Ureidopropionate	C4H8N2O3	C4H7N2O3	-1	C02642	5621
ura[c]	uracil	C4H4N2O2	C4H4N2O2	0	C00106	346
ura[e]	uracil	C4H4N2O2	C4H4N2O2	0	C00106	346
urate[c]	urate;uric acid	C5H4N4O3	C5H4N4O3	0	C00366	3657
urate[e]	urate;uric acid	C5H4N4O3	C5H4N4O3	0	C00366	3657
urea[c]	urea	CH4N2O	CH4N2O	0	C00086	3386
urea[e]	urea	CH4N2O	CH4N2O	0	C00086	3386
urea[m]	urea	CH4N2O	CH4N2O	0	C00086	3386
ureac[c]	urea-1-carboxylate	C2H4N2O3	C2H3N2O3	-1	C01010	4255
uri[c]	uridine	C9H12N2O6	C9H12N2O6	0	C00299	3593
uri[e]	uridine	C9H12N2O6	C9H12N2O6	0	C00299	3593
utp[c]	Uridine 5'-triphosphate	C9H15N2O15P3	C9H12N2O15P3	-3	C00075	3375
val[c]	L-valine	C5H11NO2	C5H11NO2	0	C00183	3483
val[e]	L-valine	C5H11NO2	C5H11NO2	0	C00183	3483
val[m]	L-valine	C5H11NO2	C5H11NO2	0	C00183	3483
vb2[c]	Vitamin B2;riboflavin	C17H20N4O6	C17H19N4O6	-1	C00255	3554
vb2[e]	Vitamin B2;riboflavin	C17H20N4O6	C17H19N4O6	-1	C00255	3554
ve[c]	tocopherol	C29H50O2	C29H50O2		C02477	5492
ve[e]	tocopherol	C29H50O2	C29H50O2		C02477	5492
vera[c]	versicolorin A	C18H10O7	C18H10O7	0		2522213
verb[c]	versicolorin B	C18H12O7	C18H12O7	0		2523123
vha[c]	versiconal hemiacetal acetate	C20H16O9	C20H16O9	0		2523253
vhoh[c]	versiconal	C18H14O8	C18H13O8	-1		2523618
x5p[c]	D-xylulose 5-phosphate	C5H11O8P	C5H9O8P	-2	C00231	353
xan[c]	xanthine	C5H4N4O2	C5H4N4O2	0	C00385	3675
xmp[c]	xanthosine 5'-phosphate	C10H13N4O9P	C10H11N4O9P	-2	C00655	3925
xol[c]	xylitol	C5H12O5	C5H12O5	0	C00379	3669
xol[e]	xylitol	C5H12O5	C5H12O5	0	C00379	3669
xtp[c]	Xanthosine 5'-triphosphate	C10H15N4O15P3	C10H12N4O15P3	-3	C00700
xtsine[c]	xanthosine	C10H12N4O6	C10H12N4O6	0	C01762	4895
xul[c]	D-xylulose	C5H10O5	C5H10O5	0	C00310	364
xul[e]	D-xylulose	C5H10O5	C5H10O5	0	C00310	364
xyl[c]	D-xylose	C5H10O5	C5H10O5	0	C00181	3481
xyl[e]	D-xylose	C5H10O5	C5H10O5	0	C00181	3481
xylan[c]	xylans	C5H10O5	C5H10O5	0	C00707	3974
xylan[e]	xylans	C5H10O5	C5H10O5	0	C00707	3974
zymst[c]	zymosterol	C27H44O	C27H44O	0	C05437	78

## Sheet: utilizable carbon and nitrogen
Exchange reactions of carbon and nitrogen sources	Predicted growth rate (Fixed comsumption rate at 1 mmol/gDCW/h. for carbohydrates, ammonium was the nitrogen source. For nitrogen sources, glucose was the carbon source.)	Tags of carbon (C) and nitrogen (N)
ex_13glucan[e]	0.142138	C
ex_1dgali[e]	0.142138	C
ex_ac[e]	0.0496449	C
ex_akg[e]	0.103437	C
ex_arab[e]	0.118448	C
ex_arabin[e]	0.355344	C
ex_bdfru[e]	0.143545	C
ex_bgal[e]	0.142138	C
ex_c120[e]	0.358538	C
ex_c140[e]	0.416642	C
ex_c160[e]	0.474894	C
ex_c161[e]	0.00282544	C
ex_c180[e]	0.533084	C
ex_c181[e]	0.0390866	C
ex_c182[e]	0.0247382	C
ex_c183[e]	0.00564751	C
ex_c60[e]	0.174642	C
ex_c80[e]	0.236969	C
ex_cellob[e]	0.284275	C
ex_cellu[e]	0.142138	C
ex_chit[e]	0.192747	C
ex_cit[e]	0.113285	C
ex_cln[e]	0.00239234	C
ex_dfru[e]	0.143545	C
ex_dglc[e]	0.142138	C
ex_eth[e]	0.0681979	C
ex_for[e]	0.00980107	C
ex_fum[e]	0.0707222	C
ex_g15l[e]	0.13299	C
ex_gal[e]	0.142138	C
ex_galnt[e]	0.131583	C
ex_gdpman[e]	0.273608	C
ex_ggl[e]	0.222354	C
ex_gl[e]	0.0802162	C
ex_glcnt[e]	0.127595	C
ex_glycogen[e]	0.142138	C
ex_gua[e]	0.0236896	C
ex_ia[e]	0.113285	C
ex_icit[e]	0.113285	C
ex_lac[e]	0.0696615	C
ex_lact[e]	0.126502	C
ex_larab[e]	0.118448	C
ex_llac[e]	0.0696615	C
ex_lxul[e]	0.118448	C
ex_mal[e]	0.0707222	C
ex_man[e]	0.142138	C
ex_mannan[e]	0.142138	C
ex_meli[e]	0.284275	C
ex_melt[e]	0.29483	C
ex_meth[e]	0.0328371	C
ex_mlt[e]	0.285682	C
ex_mnt[e]	0.152692	C
ex_oxal[e]	0.00980107	C
ex_pyr[e]	0.060514	C
ex_raff[e]	0.42782	C
ex_rib[e]	0.118448	C
ex_sor[e]	0.143545	C
ex_sot[e]	0.152692	C
ex_stac[e]	0.569957	C
ex_star[e]	0.142138	C
ex_suc[e]	0.285682	C
ex_succ[e]	0.0763043	C
ex_xol[e]	0.127595	C
ex_xul[e]	0.118448	C
ex_xyl[e]	0.118448	C
ex_xylan[e]	0.118448	C
ex_cyan[e]	0.139464	C
ex_ad[e]	0.15465	N
ex_ala[e]	0.208738	N
ex_amp[e]	0.242653	N
ex_arg[e]	0.24234	N
ex_asn[e]	0.205251	N
ex_asp[e]	0.209801	N
ex_atp[c]	0.242653	N C
ex_hno3[e]	0.120179	N
ex_nh3[e]	0.139464	N
ex_urea[e]	0.139464	N
ex_gn[e]	0.147247	N
ex_gly[e]	0.153085	N
ex_ser[e]	0.20084	N
ex_thr[e]	0.218074	N
ex_cys[e]	0.227133	N
ex_ile[e]	0.228022	N
ex_leu[e]	0.228022	N
ex_tyr[e]	0.228022	N
ex_gaba[e]	0.228022	N
ex_val[e]	0.228022	N
ex_glu[e]	0.228022	N
ex_pro[e]	0.228022	N
ex_gln[e]	0.24234	N

## Sheet: growth sensitivity to GAM
71.4 g+p: GAM = 71.4 mmol/gDCW, maximizing cell growth with constrained itaconate production.
71.4 g-p: GAM = 71.4 mmol/gDCW, maximizing cell growth without constrained itaconate production.
Rxn name	Formula	71.4 g+p	71.4 g-p	61 g+p	61 g-p	59 g+p	59 g-p	49 g+p	49 g-p
Biomass	71.4 h2o[c] + 0.14613 asp[c] + 0.15371 glu[c] + 0.22294 ala[c] + 0.17484 gly[c] + 0.10126 gln[c] + 71.42731 atp[c] + 0.08887 asn[c] + 0.15713 pro[c] + 0.03297 cys[c] + 0.16063 arg[c] + 0.05566 met[c] + 0.2067 ser[c] + 0.03822 trp[c] + 0.15021 thr[c] + 0.06317 his[c] + 0.09533 phe[c] + 0.07351 tyr[c] + 0.26575 chit[c] + 0.02795 utp[c] + 0.3348 mnt[c] + 0.03051 gtp[c] + 0.0015 glycogen[c] + 0.90068…	0.155334	0.238035	0.155334	0.241518	0.155334	0.2422	0.155334	0.245667
ex_dglc[e]	dglc[e] <=>	-1.718	-1.718	-1.718	-1.718	-1.718	-1.718	-1.718	-1.718
ex_ia[e]	ia[e] ->	0.702	0	0.702	0	0.702	0	0.702	0
r0001	ile[m] + h2o[m] + o2[m] <=> omval[m] + nh3[m] + h2o2[m]	0	0	0	0	0	0	0	0
r0002	h2o[m] + o2[m] + asp[m] -> h2o2[m] + nh3[m] + oa[m]	0	0	0	0	0	0	0	0
r0003	asp[c] -> dasp[c]	-2.60872e-24	0	0	0	2.429e-27	6.57853e-28	0.53648	0
r0004	h2o[e] + o2[e] + dasp[e] -> h2o2[e] + nh3[e] + oa[e]	0	0	0	0	0	0	0.53648	0
r0005	h2o[c] + o2[c] + dasp[c] -> h2o2[c] + nh3[c] + oa[c]	0	0	0	-4.36124e-28	0	0	-1.85628e-13	-3.39766e-24
r0006	akg[c] + asp[c] -> oa[c] + glu[c]	982.747	974.99	0	0	0	0	984.395	980.523
r0007	oa[m] + glu[m] -> asp[m] + akg[m]	982.854	975.154	0.107166	0.166411	0.107166	0.166881	985.038	980.693
r0008	akg[c] + ala[c] <=> glu[c] + pyr[c]	1000	-0.042482	1000	1000	999.972	999.957	1000	1000
r0009	akg[m] + ala[m] <=> glu[m] + pyr[m]	0.0191089	0.0292449	0.0191089	0.0296729	0.0191089	0.0297567	0.0191089	0.0301827
r0010	ala[c] + glx[c] <=> pyr[c] + gly[c]	-1000	-1000	-1000	-1000	-1000	-1000	-1000	-1000
r0011	h2o[m] + succsal[m] + nadp[m] -> 2 h[m] + nadph[m] + succ[m]	0	0	0	0	0	0	0	0
r0012	h2o[m] + succsal[m] + nad[m] -> 2 h[m] + succ[m] + nadh[m]	0	0	0	0	0	0	0	0
r0013	akg[m] + bala[m] <=> glu[m] + oppa[m]	0	0	0	0	0	0	0	0
r0014	akg[m] + gaba[m] -> glu[m] + succsal[m]	0	0	0	0	0	0	0	0
r0015	pyr[m] + gaba[m] -> ala[m] + succsal[m]	0	0	0	0	0	0	0	0
r0016	h2o[c] + asp[c] + gln[c] + atp[c] -> glu[c] + 2 h[c] + amp[c] + ppi[c] + asn[c]	0.0138223	0.0211541	0.0138223	0.0214637	0.0138223	0.0215243	0.0138223	0.0218324
r0017	h2o[c] + asn[c] -> nh3[c] + asp[c]	0	0	0	0	0	0	0	0
r0018	2 h2o[c] + phc[c] + nad[c] -> h[c] + nadh[c] + ehglu[c]	0	0	0	0	0	0	0	0
r0019	akg[c] + ehglu[c] -> glu[c] + hakg[c]	0	0	0	0	0	0	0	0
r0020	h2o[c] + agmt[c] -> nh3[c] + ncapsc[c]	0	0	0	0	0	0	0	0
r0021	akg[c] + cys[c] -> glu[c] + mrpyr[c]	0	0	0	0	0	0	0	0
r0022	akg[c] + cyse[c] -> glu[c] + slpyr[c]	0	0	0	0	0	0	0	0
r0023	hpro[c] + fad[m] -> phc[c] + fadh2[m]	0	0	0	0	0	0	0.013785	0
r0024	accoa[c] + ptrsc[c] -> h[c] + coa[c] + naps[c]	0	0	0	0	0	0	0	0
r0025	sprmd[c] + dsam[c] -> h[c] + spere[c] + mta[c]	0	0	0	0	0	0	0	0
r0026	h2o[c] + 3 h[c] + ureac[c] -> 2 nh3[c] + 2 co2[c]	0	0	0	0	0	0	0	0
r0027	glugsal[c] <=> h2o[c] + h[c] + p5c[c]	0.0244391	0.0374024	0.0244391	0.0379498	0.0244391	0.0380569	0.0244391	0.0386017
r0028	o2[c] + akg[c] + pro[c] -> co2[c] + succ[c] + hpro[c]	0	0	0	0	0	0	0	0
r0029	h[m] + nadph[m] + naglup[m] -> nadp[m] + naglus[m] + pi[m]	0.0494226	0.0756379	0.0494226	0.0387951	0.0494226	0.0769615	0.0494226	0.0780632
r0030	h[c] + nadph[c] + glup[c] -> nadp[c] + pi[c] + glugsal[c]	0	0	0	0.0379498	0	0	0	0
r0031	h2o[m] + nad[m] + glugsal[m] -> glu[m] + 2 h[m] + nadh[m]	0	0	0	0	0	0	0	0
r0032	2 h[c] + nadph[c] + p5c[c] <=> pro[c] + nadp[c]	0.0244391	0.0374024	0.0244391	0.0379498	0.0244391	0.0380569	0.0244391	0.0386017
r0033	2 h[c] + nadph[c] + phc[c] -> hpro[c] + nadp[c]	0	0	0	0	0	0	0	0
r0034	2 h[c] + phc[c] + nadh[c] -> hpro[c] + nad[c]	0	0	0	0	0	0	0.013785	0
r0035	nad[m] + pro[m] -> 2 h[m] + nadh[m] + p5c[m]	0	0	0	0	0	0	0	0
r0036	orn[m] + cap[m] -> h[m] + pi[m] + citr[m]	0.0249835	0.0382355	0.0249835	0.0387951	0.0249835	0.0389046	0.0249835	0.0394615
r0037	glu[m] + naorn[m] -> orn[m] + naglu[m]	0.0494226	0.0756379	0.0494226	0.0387951	0.0494226	0.0769615	0.0494226	0.0780632
r0038	glu[m] + naglus[m] -> akg[m] + naorn[m]	0.0494226	0.0756379	0.0494226	0.0387951	0.0494226	0.0769615	0.0494226	0.0780632
r0039	akg[c] + orn[c] -> glu[c] + glugsal[c]	0.0244391	0.0374024	0.0244391	0	0.0244391	0.0380569	0.0244391	0.0386017
r0040	glu[c] + atp[c] -> glup[c] + adp[c]	0	0	0	0.0379498	0	0	0	0
r0041	h2o[m] + naorn[m] -> orn[m] + ac[m]	1.07197e-17	0	0	0	-2.14484e-18	-6.66299e-18	0	0
r0042	h2o[c] + gbad[c] -> nh3[c] + gbat[c]	0	0	0	0	0	0	0	0
r0043	h2o[c] + arg[c] -> orn[c] + urea[c]	0	0	0	0	0	0	0	0
r0044	h2o[m] + arg[m] -> orn[m] + urea[m]	0	0	0	0	0	0	0	0
r0045	h2o[c] + agmt[c] -> ptrsc[c] + urea[c]	0	0	0	0	0	0	0	0
r0046	h[c] + orn[c] -> co2[c] + ptrsc[c]	0	0	0	0	0	0	0	0
r0047	h[m] + orn[m] -> co2[m] + ptrsc[m]	0	0	0	0	0	0	0	0
r0048	glu[m] + accoa[m] -> h[m] + naglu[m] + coa[m]	0	-1.32318e-17	-1.68765e-18	8.31807e-18	0	0	0	-4.51977e-18
r0049	naglu[m] + atp[m] -> naglup[m] + adp[m]	0.0494226	0.0756379	0.0494226	0.0387951	0.0494226	0.0769615	0.0494226	0.0780632
r0050	h2o[c] + gln[c] -> nh3[c] + glu[c]	0	0	0	0	0	0	0	0
r0051	ptrsc[c] + dsam[c] -> h[c] + sprmd[c] + mta[c]	0	0	0	0	0	0	0	0
r0052	h[c] + sam[c] <=> co2[c] + dsam[c]	0	0	0	0	0	0	0	0
r0053	asp[c] + atp[c] + citr[c] -> 2 h[c] + amp[c] + ppi[c] + argsucc[c]	0.0249835	0.0382355	0.0249835	0.0387951	0.0249835	0.0389046	0.0249835	0.0394615
r0054	argsucc[c] <=> arg[c] + fum[c]	0.0249835	0.0382355	0.0249835	0.0387951	0.0249835	0.0389046	0.0249835	0.0394615
r0055	h2o[c] + cysn[c] -> nh3[c] + pyr[c] + tcysn[c]	0	0	0	0	0	0	0	0
r0056	mrpyr[c] + slfi[c] -> pyr[c] + tsulf[c]	0	7.8069e-30	0	0	0	0	0	0
r0057	h[c] + nadh[c] + mrpyr[c] -> nad[c] + mrlac[c]	0	0	0	0	0	0	0	0
r0058	h2o[c] + 3sulpyr[c] -> pyr[c] + slfi[c]	0	0	0	0	0	0	0	0
r0059	metso[c] + rthio[c] -> h2o[c] + met[c] + othio[c]	0	0	0	0	0	0	0	0
r0060	o2[c] + dmpeno[c] -> 2 h[c] + mob[c] + for[c]	0	0	0	0	0	0	0	0
r0061	o2[c] + dmpeno[c] -> h[c] + for[c] + mtprop[c] + co[c]	0	0	0	0	0	0	0	0
r0062	h2o[c] + osuhs[c] -> nh3[c] + succ[c] + obut[c]	0	0	0	0	0	0	0	0
r0063	h[c] + osuhs[c] + h2s[c] -> succ[c] + hcys[c]	0	0	0	0	0	0	0	0
r0064	tsulf[c] + oaser[c] -> h[c] + ac[c] + scysn[c]	0	0	0	0	0	0	0	0
r0065	pi[c] + mta[c] -> ad[c] + mtrip[c]	0	0	0	0	0	0	0	0
r0066	mtrip[c] -> h2o[c] + dkmtp[c]	0	0	0	0	0	0	0	0
r0067	h2o[m] + o2[m] + met[m] -> h2o2[m] + nh3[m] + mob[m]	0	0	0	0	0	0	0	0
r0068	h2o[c] + o2[c] + met[c] -> h2o2[c] + nh3[c] + mob[c]	0	0	0	0	0	0	0	0
r0069	akg[c] + 3sulala[c] -> glu[c] + 3sulpyr[c]	0	0	0	0	0	0	0	0
r0070	glu[c] + mob[c] -> akg[c] + met[c]	0	0	0	0	0	0	0	0
r0071	sam[c] + hcys[c] -> h[c] + met[c] + sah[c]	0	0	0	0	0	0	0	0
r0072	hcys[c] + mthf[c] -> met[c] + thf[c]	0.0458266	0.0701345	0.0458266	0.071161	0.0458266	0.0713618	0.0458266	0.0723834
r0073	cys[c] + oahser[c] -> h[c] + ac[c] + llct[c]	0	0	0	0	0	0	0	0
r0074	oahser[c] + h2s[c] -> hcys[c] + ac[c]	0	0	0	0	0	0	0	0
r0075	oahser[c] + mseth[c] -> h[c] + met[c] + ac[c]	0	0	0	0	0	0	0	0
r0076	h2o[c] + atp[c] + met[c] -> h[c] + ppi[c] + pi[c] + sam[c]	0.0371696	0.0568855	0.0371696	0.0577181	0.0371696	0.057881	0.0371696	0.0587095
r0077	h2o[c] + sah[c] -> hcys[c] + adn[c]	0.0371696	0.0568855	0.0371696	0.0577181	0.0371696	0.057881	0.0371696	0.0587095
r0078	h2o[c] + llct[c] <=> nh3[c] + cys[c] + obut[c]	-0.00865704	-0.013249	-0.00865704	-0.0134429	-0.00865704	-0.0134809	-0.00865704	-0.0136738
r0079	h2o[c] + cys[c] <=> nh3[c] + pyr[c] + h[c] + h2s[c]	-0.013785	-0.021097	-0.013785	-0.0214058	-0.013785	-0.0214662	2.61562	-0.0217735
r0080	hcys[c] + ser[c] -> h2o[c] + llct[c]	0	0	0	0	0	0	0	0
r0081	ser[c] -> nh3[c] + pyr[c]	0	0	0	0	0	0	0	0
r0082	h2o[c] + o2[c] + trp[c] -> h2o2[c] + nh3[c] + ipyr[c]	0	0	0	0	0	0	0	0
r0083	h[c] + nadph[c] + basp[c] -> nadp[c] + pi[c] + aspsa[c]	0.0117693	0.0180121	0.0117693	0.0182757	0.0117693	0.0183273	0.0117693	0.0185896
r0084	asp[c] + atp[c] -> adp[c] + basp[c]	0.0117693	0.0180121	0.0117693	0.0182757	0.0117693	0.0183273	0.0117693	0.0185896
r0085	cys[c] + osuhs[c] -> succ[c] + llct[c]	0	0	0	0	0	0	0	0
r0086	tsulf[c] + rthio[c] + oaser[c] -> h[c] + cys[c] + slfi[c] + othio[c] + ac[c]	0	7.8069e-30	0	0	0	0	0	0
r0087	accoa[c] + ser[c] -> coa[c] + oaser[c]	0	0	0	0	0	0	0	0
r0088	accoa[c] + hser[c] -> coa[c] + oahser[c]	0	0	0	-2.03797e-28	0	0	0	0
r0089	h2s[c] + oaser[c] -> cys[c] + ac[c]	0	-7.8069e-30	0	0	0	0	0	0
r0090	tsulf[c] + rthio[c] + oahser[c] -> h[c] + slfi[c] + hcys[c] + othio[c] + ac[c]	0	0	0	0	0	0	0	0
r0091	o2[c] + cys[c] -> h[c] + 3sulala[c]	0	0	0	0	0	0	0	0
r0092	akg[c] + gln[c] + h[c] + nadh[c] -> 2 glu[c] + nad[c]	0	0	0	0	0	0	0	0
r0093	h2o[c] + glu[c] + nad[c] -> nh3[c] + akg[c] + h[c] + nadh[c]	0	999.2	2.34023	0	999.477	999.186	996.311	999.174
r0094	h2o[c] + glu[c] + nadp[c] <=> nh3[c] + akg[c] + h[c] + nadph[c]	-0.523004	-1000	-1000	-998.266	-1000	-1000	-1000	-1000
r0095	h2o[m] + nadp[m] + glugsal[m] -> glu[m] + 2 h[m] + nadph[m]	0	0	0	0	0	0	0	0
r0096	2 h2o[m] + nad[m] + p5c[m] -> glu[m] + h[m] + nadh[m]	0	0	0	0	0	0	0	0
r0097	h2o[c] + o2[c] + amac[c] -> h2o2[c] + nh3[c] + mgxl[c]	0	0	0	0	0	0	0	0
r0098	thf[c] + ser[c] <=> h2o[c] + gly[c] + metthf[c]	0.0768355	0.117591	0.0768355	0.119312	0.0768355	0.119649	0.0768355	0.121362
r0099	h[c] + fad[c] + cln[c] -> fadh2[c] + betald[c]	0	0	0	0	0	0	0	0
r0100	ser[c] + pyr[c] <=> 3hpyr[c] + ala[c]	0.0346748	-999.989	0.0346748	0.0538441	0.00691661	0.0107706	0.0346748	0.054769
r0101	ser[c] + h2s[c] -> cys[c] + h2o[c]	0	0	0	0	0	0	2.6294	0
r0102	gly[c] + h2o[c] + o2[c] -> glx[c] + nh3[c] + h2o2[c]	0	0	997.137	997.453	0	0	0	0
r0103	h2o[m] + o2[m] + sarc[m] -> h2o2[m] + gly[m] + fald[m]	0	0	0	0	0	0	0	0
r0104	nad[c] + 3pg[c] <=> h[c] + nadh[c] + php[c]	997.306	0.216809	997.306	997.716	0.141665	0.220603	2.80891	0.283527
r0105	h[e] + fad[e] + cln[e] -> fadh2[e] + betald[e]	0	0	0	0	0	0	0	0
r0106	h2o[c] + nad[c] + betald[c] -> 2 h[c] + nadh[c] + bet[c]	0	0	0	0	0	0	0	0
r0107	h2o[m] + o2[m] + amac[m] -> h2o2[m] + nh3[m] + mgxl[m]	0	0	0	0	0	0	0	0
r0108	h[m] + nadh[m] + hplys[m] <=> nad[m] + dhplys[m]	0.0191089	0.0292449	0.0191089	0.0296729	0.0191089	0.0297567	0.0191089	0.0301827
r0109	h2o[m] + h[m] + fad[m] + dmgly[m] -> fadh2[m] + sarc[m] + fald[m]	0	0	0	0	0	0	0	0
r0110	nad[c] + thr[c] -> h[c] + nadh[c] + aobut[c]	0	0	0	0	0	0	0	0
r0111	nad[m] + gly[m] + thf[m] -> nh3[m] + nadh[m] + co2[m] + metthf[m]	0	0	0	0	0	0	0	0
r0112	ala[m] + glx[m] <=> pyr[m] + gly[m]	-0.0191089	-0.0292449	-0.0191089	-0.0296729	-0.0191089	-0.0297567	-0.0191089	-0.0301827
r0113	glu[c] + php[c] <=> akg[c] + 3pser[c]	997.306	0.216809	997.306	997.716	0.141665	0.220603	2.80891	0.283527
r0114	atp[c] + hser[c] -> h[c] + adp[c] + phser[c]	0.0117693	0.0180121	0.0117693	0.0182757	0.0117693	0.0183273	0.0117693	0.0185896
r0115	h2o[c] + 3pser[c] -> pi[c] + ser[c]	997.306	0.216809	997.306	997.716	0.141665	0.220603	2.80891	0.283527
r0116	gly[c] + acal[c] <=> thr[c]	0.0393595	0.060237	0.0393595	0.0611186	0.0393595	0.0612912	0.0393595	0.0621685
r0117	h2o[c] + phser[c] -> pi[c] + thr[c]	0.0117693	0.0180121	0.0117693	0.0182757	0.0117693	0.0183273	0.0117693	0.0185896
r0118	gly[c] + akg[c] <=> glx[c] + glu[c]	-2.86324	4.9241e-29	-1000	-1000	-1000	-1000	-999.99	-999.984
r0119	thr[c] -> nh3[c] + obut[c]	0.00865704	0.013249	0.00865704	0.0134429	0.00865704	0.0134809	0.00865704	0.0136738
r0120	h[c] + nadph[c] + aspsa[c] -> nadp[c] + hser[c]	0.0117693	0.0180121	0.0117693	0.0182757	0.0117693	0.0183273	0.0117693	0.0185896
r0121	thr[m] -> nh3[m] + obut[m]	0.0191089	0.0292449	0.0191089	0.0296729	0.0191089	0.0297567	0.0191089	0.0301827
r0122	ser[c] + glx[c] <=> 3hpyr[c] + gly[c]	997.137	1000	997.137	997.453	2.07067e-13	2.07067e-13	0.0100802	0.0159217
r0123	h2o[m] + methf[m] -> h[m] + foli[m]	0	0	0	0	0	0	0	0
r0124	nh3[m] + metthf[m] + dhplys[m] <=> h[m] + thf[m] + hpsamlys[m]	0.0191089	0.0292449	0.0191089	0.0296729	0.0191089	0.0297567	0.0191089	0.0301827
r0125	co2[m] + hpsamlys[m] <=> gly[m] + hplys[m]	0.0191089	0.0292449	0.0191089	0.0296729	0.0191089	0.0297567	0.0191089	0.0301827
r0126	h[c] + his[c] <=> co2[c] + hisan[c]	0	0	0	0	0	0	0	0
r0127	atp[c] + prpp[c] -> h[c] + ppi[c] + prbatp[c]	0.0098251	0.0150366	0.0098251	0.0152567	0.0098251	0.0152998	0.0098251	0.0155188
r0128	h2o[c] + 2 nad[c] + hisol[c] -> 3 h[c] + 2 nadh[c] + his[c]	0.0098251	0.0150366	0.0098251	0.0152567	0.0098251	0.0152998	0.0098251	0.0155188
r0129	his[c] + sam[c] -> mhis[c] + sah[c]	0	0	0	0	0	0	0	0
r0130	atp[c] + r5p[c] -> h[c] + amp[c] + prpp[c]	0.0349408	0.0534745	0.0349408	0.0542571	0.0349408	0.0544102	0.0349408	0.0551891
r0131	gln[c] + prlp[c] <=> glu[c] + 2 h[c] + aicar[c] + dimgp[c]	0.0098251	0.0150366	0.0098251	0.0152567	0.0098251	0.0152998	0.0098251	0.0155188
r0132	glu[c] + imacp[c] -> akg[c] + hisolp[c]	0.0098251	0.0150366	0.0098251	0.0152567	0.0098251	0.0152998	0.0098251	0.0155188
r0133	h2o[c] + hisolp[c] -> pi[c] + hisol[c]	0.0098251	0.0150366	0.0098251	0.0152567	0.0098251	0.0152998	0.0098251	0.0155188
r0134	h2o[c] + prbamp[c] -> prfp[c]	0.0098251	0.0150366	0.0098251	0.0152567	0.0098251	0.0152998	0.0098251	0.0155188
r0135	h2o[c] + prbatp[c] -> 2 h[c] + ppi[c] + prbamp[c]	0.0098251	0.0150366	0.0098251	0.0152567	0.0098251	0.0152998	0.0098251	0.0155188
r0136	dimgp[c] -> h2o[c] + imacp[c]	0.0098251	0.0150366	0.0098251	0.0152567	0.0098251	0.0152998	0.0098251	0.0155188
r0137	h[c] + prfp[c] -> prlp[c]	0.0098251	0.0150366	0.0098251	0.0152567	0.0098251	0.0152998	0.0098251	0.0155188
r0138	nadh[m] + co2[m] + aka[m] <=> nad[m] + hicit[m]	-0.0175132	-0.352966	-0.0175132	-0.307843	-0.0175132	-0.299014	-0.0175132	-0.254108
r0139	2 h[m] + nadph[m] + ama[m] -> h2o[m] + nadp[m] + amasa[m]	0.0175132	0.0268027	0	0	0	0	0	0
r0140	2 h[m] + nadh[m] + ama[m] -> h2o[m] + nad[m] + amasa[m]	0	0	0.0175132	0.027195	0.0175132	0.0272717	0.0175132	0.0276621
r0141	glu[m] + h[m] + nadph[m] + amasa[m] <=> h2o[m] + nadp[m] + sacp[m]	0.0175132	0.0268027	0.0175132	0.027195	0.0175132	0.0272717	0.0175132	0.0276621
r0142	h2o[m] + nad[m] + sacp[m] <=> akg[m] + h[m] + nadh[m] + lys[m]	0.0175132	0.0268027	0.0175132	0.027195	0.0175132	0.0272717	0.0175132	0.0276621
r0143	h2o[m] + akg[m] + accoa[m] -> h[m] + coa[m] + hcit[m]	0.0175132	0.352966	0.0175132	0.307843	0.0175132	0.299014	0.0175132	0.254108
r0144	h2o[m] + hacn[m] <=> hicit[m]	0.0175132	0.352966	0.0175132	0.307843	0.0175132	0.299014	0.0175132	0.254108
r0145	pyr[c] + aspsa[c] -> 2 h2o[c] + h[c] + didipc[c]	0	0	0	0	0	0	0	0
r0146	h2o[m] + hacn[m] <=> hcit[m]	-0.0175132	-0.352966	-0.0175132	-0.307843	-0.0175132	-0.299014	-0.0175132	-0.254108
r0147	glu[c] + aka[c] <=> akg[c] + ama[c]	0	0	0	0	0	0	0	0
r0148	glu[m] + aka[m] <=> akg[m] + ama[m]	0.0175132	0.0268027	0.0175132	0.027195	0.0175132	0.0272717	0.0175132	0.0276621
r0149	h2o[m] + nadp[m] + phal[m] <=> 2 h[m] + nadph[m] + pac[m]	0	0	0	0	0	0	0	0
r0150	h2o[c] + o2[c] + phem[c] <=> h2o2[c] + nh3[c] + phal[c]	0	0	0	0	0	0	0	0
r0151	o2[m] + ppyr[m] -> co2[m] + hphea[m]	0	0	0	0	0	0	0	0
r0152	o2[m] + phe[m] -> h2o[m] + co2[m] + pad[m]	0	0	0	0	0	0	0	0
r0153	h[c] + phe[c] -> co2[c] + phem[c]	0	0	0	0	0	0	0	0
r0154	2 h2o2[m] -> 2 h2o[m] + o2[m]	0	0	0	0	0	0	0	0
r0155	o2[m] + h[m] + nadh[m] + pac[m] -> h2o[m] + nad[m] + hphea[m]	0	0	0	0	0	0	0	0
r0156	h2o[m] + pad[m] -> nh3[m] + pac[m]	0	0	0	0	0	0	0	0
r0157	3psme[c] -> pi[c] + chor[c]	0.0322049	0.0492874	0.0322049	0.0500088	0.0322049	0.0501499	0.0322049	0.0508678
r0158	h2o[c] + pcace[c] <=> dhsk[c]	0	0	0	0	0	0	0	0
r0159	dhsk[c] -> h2o[c] + papce[c]	0	0	0	0	0	0	0	0
r0160	dhsk[e] -> h2o[e] + papce[e]	0	0	0	0	0	0	0	0
r0161	nadp[c] + phen[c] -> co2[c] + nadph[c] + 4hppyr[c]	0.0114333	0.0174979	0.0114333	0.017754	0.0114333	0.0178041	0.0114333	0.018059
r0162	h[c] + nadh[c] + dqt[c] <=> nad[c] + qt[c]	0	0	0	0	0	0	0	0
r0163	h[c] + nadh[c] + dhsk[c] -> nad[c] + sme[c]	0	0.0492874	0	0	0	0	0	0
r0164	h[c] + nadph[c] + dhsk[c] -> nadp[c] + sme[c]	0.0322049	0	0.0322049	0.0500088	0.0322049	0.0501499	0.0322049	0.0508678
r0165	prpp[c] + an[c] -> h[c] + ppi[c] + npran[c]	0.00594452	0.00909768	0.00594452	0.00923083	0.00594452	0.00925689	0.00594452	0.0093894
r0166	pep[c] + sme3p[c] -> pi[c] + 3psme[c]	0.0322049	0.0492874	0.0322049	0.0500088	0.0322049	0.0501499	0.0322049	0.0508678
r0167	h2o[c] + pep[c] + e4p[c] -> pi[c] + 3ddah7p[c]	0.0322049	0.0492874	0.0322049	0.0500088	0.0322049	0.0501499	0.0322049	0.0508678
r0168	atp[c] + sme[c] -> h[c] + adp[c] + sme3p[c]	0.0322049	0.0492874	0.0322049	0.0500088	0.0322049	0.0501499	0.0322049	0.0508678
r0169	2 h[c] + cmusa[c] -> co2[c] + am6sa[c]	0	0	0	0	0	0	0	0
r0170	h[c] + cpad5p[c] -> h2o[c] + co2[c] + igp[c]	0.00594452	0.00909768	0.00594452	0.00923083	0.00594452	0.00925689	0.00594452	0.0093894
r0171	gln[c] + chor[c] -> glu[c] + pyr[c] + h[c] + an[c]	0.00594452	0.00909768	0.00594452	0.00923083	0.00594452	0.00925689	0.00594452	0.0093894
r0172	dqt[c] -> h2o[c] + dhsk[c]	0.0322049	0.0492874	0.0322049	0.0500088	0.0322049	0.0501499	0.0322049	0.0508678
r0173	ser[c] + igp[c] -> h2o[c] + trp[c] + t3p1[c]	0.00594452	0.00909768	0.00594452	0.00923083	0.00594452	0.00925689	0.00594452	0.0093894
r0174	h[c] + phen[c] -> h2o[c] + co2[c] + ppyr[c]	0.0148271	0.0226918	0.0148271	0.0230239	0.0148271	0.0230889	0.0148271	0.0234194
r0175	3ddah7p[c] -> pi[c] + dqt[c]	0.0322049	0.0492874	0.0322049	0.0500088	0.0322049	0.0501499	0.0322049	0.0508678
r0176	macac[c] -> fuacac[c]	-5.08571e-24	0	0	0	0	0	0	0
r0177	npran[c] -> cpad5p[c]	0.00594452	0.00909768	0.00594452	0.00923083	0.00594452	0.00925689	0.00594452	0.0093894
r0178	chor[c] -> phen[c]	0.0262604	0.0401897	0.0262604	0.040778	0.0262604	0.0408931	0.0262604	0.0414784
r0179	h2o[c] + o2[c] + phe[c] -> h2o2[c] + nh3[c] + ppyr[c]	0	0	0	0	0	0	0	0
r0180	h2o[c] + o2[c] + tyr[c] -> h2o2[c] + nh3[c] + 4hppyr[c]	0	0	0	0	0	0	0	0
r0181	akg[c] + phe[c] <=> glu[c] + ppyr[c]	-0.0148271	-0.0226918	-0.0148271	-0.0230239	-0.0148271	-0.0230889	-0.0148271	-0.0234194
r0182	akg[c] + tyr[c] <=> glu[c] + 4hppyr[c]	-0.0114333	-0.0174979	-0.0114333	-0.017754	-0.0114333	-0.0178041	-0.0114333	-0.018059
r0183	o2[c] + han[c] -> h[c] + cmusa[c]	0	0	0	0	0	0	0	0
r0184	h2o[m] + o2[m] + trp[m] -> h2o2[m] + nh3[m] + ipyr[m]	0	0	0	0	0	0	0	0
r0185	akg[c] + trp[c] -> glu[c] + ipyr[c]	0	0	0	0	0	0	0	0
r0186	h[c] + ipyr[c] -> co2[c] + i3ad[c]	0	0	0	0	0	0	0	0
r0187	nad[m] + coa[m] + aka[m] -> nadh[m] + co2[m] + gltcoa[m]	1.63354e-25	0.326163	1.63132e-26	0.280648	0	0.271742	0	0.226446
r0188	h2o[c] + o2[c] + trpm[c] -> h2o2[c] + nh3[c] + i3ad[c]	0	0	0	0	0	0	0	0
r0189	o2[c] + trp[c] -> fkyn[c]	0	0	0	0	0	0	0	0
r0190	o2[m] + h[m] + nadph[m] + kyn[m] -> h2o[m] + nadp[m] + hkyn[m]	0	0	0	0	0	0	0	0
r0191	akg[c] + kyn[c] -> glu[c] + apebu[c]	0	0	0	0	0	0	0	0
r0192	h2o[c] + kyn[c] -> ala[c] + h[c] + an[c]	-1.77339e-24	0	0	0	2.58637e-28	2.31049e-27	-5.9693e-29	0
r0193	h2o[c] + hkyn[c] -> ala[c] + h[c] + han[c]	0	0	0	0	0	0	0	0
r0194	h[c] + trp[c] -> co2[c] + trpm[c]	0	0	0	0	0	0	0	0
r0195	h2o[c] + fkyn[c] -> h[c] + for[c] + kyn[c]	-1.77385e-24	0	0	0	2.87268e-28	2.31867e-27	-5.96931e-29	0
r0196	2 h2o[c] + acnl[c] -> nh3[c] + iaa[c]	0	0	0	0	0	0	0	0
r0197	dhpen[m] -> pyr[m] + succsal[m]	0	0	0	0	0	0	0	0
r0198	o2[c] + 25dhba[c] -> h[c] + mpyr[c]	0	0	0	0	0	0	0	0
r0199	h[c] + macac[c] <=> o2[c] + homogen[c]	5.08534e-24	0	0	0	0	0	0	0
r0200	h2o[c] + fuacac[c] -> h[c] + fum[c] + acact[c]	-5.08548e-24	0	0	0	0	0	0	0
r0201	o2[c] + 4hppyr[c] -> co2[c] + homogen[c]	0	0	0	0	0	0	0	0
r0202	h2o[c] + nadp[c] + fald[c] + ccl[c] <=> o2[c] + h[c] + nadph[c] + gua[c]	0	0	0	0	0	0	0	0
r0203	oicap[c] + h[c] -> 4mop[c] + co2[c]	0	0	0	0	0	0	0	0
r0204	oicap[m] + h[m] -> 4mop[m] + co2[m]	0.0361508	0.0553264	0.0361508	0.0561361	0.0361508	0.0562946	0.0361508	0.0571004
r0205	h[m] + nadph[m] + abut[m] <=> nadp[m] + dmvat[m]	0.0191089	0.0292449	0.0191089	0.0296729	0.0191089	0.0297567	0.0191089	0.0301827
r0206	nad[m] + ippmal[m] <=> h[m] + nadh[m] + oicap[m]	0.0361508	0.0553264	0.0361508	0.0561361	0.0361508	0.0562946	0.0361508	0.0571004
r0207	h[m] + nadph[m] + aclac[m] -> nadp[m] + dhmva[m]	0.0612401	0.0937237	0.0612401	0.0950954	0.0612401	0.0953639	0.0612401	0.096729
r0208	dhmva[m] -> h2o[m] + oival[m]	0.0612401	0.0937237	0.0612401	0.0950954	0.0612401	0.0953639	0.0612401	0.096729
r0209	dmvat[m] -> h2o[m] + omval[m]	0.0191089	0.0292449	0.0191089	0.0296729	0.0191089	0.0297567	0.0191089	0.0301827
r0210	glu[c] + omval[c] <=> akg[c] + ile[c]	0	0	0	0	0	0	0	0
r0211	glu[m] + omval[m] <=> akg[m] + ile[m]	0.0191089	0.0292449	0.0191089	0.0296729	0.0191089	0.0297567	0.0191089	0.0301827
r0212	glu[m] + 4mop[m] <=> akg[m] + leu[m]	0.0361508	0.0553264	0.0361508	0.0561361	0.0361508	0.0562946	0.0361508	0.0571004
r0213	glu[c] + 4mop[c] <=> akg[c] + leu[c]	0	0	0	0	0	0	0	0
r0214	glu[m] + oival[m] <=> akg[m] + val[m]	0.0250892	0.0383973	0.0250892	0.0389593	0.0250892	0.0390693	0.0250892	0.0396286
r0215	glu[c] + oival[c] <=> akg[c] + val[c]	0	0	0	0	0	0	0	0
r0216	h2o[m] + accoa[m] + oival[m] -> h[m] + coa[m] + ippmal[m]	0.0361508	0.0553264	0.0361508	0.0561361	0.0361508	0.0562946	0.0361508	0.0571004
r0217	h2o[m] + mgcoa[m] -> hmgcoa[m]	0	0	0	0	0	0	0	0
r0218	h[m] + fad[m] + isocoa[m] -> fadh2[m] + maclcoa[m]	0	0	0	0	0	0	0	0
r0219	coa[m] + mcecoa[m] -> accoa[m] + ppacoa[m]	-9.91161e-24	0	0	0	3.32948e-27	0	0	0
r0220	h[m] + fad[m] + mbcoa[m] -> fadh2[m] + mcrocoa[m]	-9.91021e-24	0	0	0	3.3404e-27	0	0	0
r0221	nad[c] + hyisorate[c] <=> h[c] + nadh[c] + mmshy[c]	0	0	0	0	0	0	0	0
r0222	succoa[m] + acact[m] <=> succ[m] + aaccoa[m]	0	0	0	0	0	-4.0181e-27	0	0
r0223	nad[m] + coa[m] + oival[m] -> co2[m] + nadh[m] + isocoa[m]	0	0	0	0	0	0	0	0
r0224	atp[m] + mcrcoa[m] + hco3[m] -> h[m] + pi[m] + adp[m] + mgcoa[m]	0	0	0	0	0	-3.96654e-27	0	0
r0225	nad[m] + coa[m] + omval[m] -> co2[m] + nadh[m] + mbcoa[m]	0	0	0	0	0	0	0	0
r0226	nad[m] + coa[m] + 4mop[m] -> co2[m] + nadh[m] + ivacoa[m]	0	0	0	0	0	-3.96002e-27	0	0
r0227	h[m] + fad[m] + ivacoa[m] -> fadh2[m] + mcrcoa[m]	0	0	0	0	0	-3.91749e-27	0	0
r0228	pyr[m] + h[m] + obut[m] -> co2[m] + abut[m]	0.0191089	0.0292449	0.0191089	0.0296729	0.0191089	0.0297567	0.0191089	0.0301827
r0229	2 pyr[m] + h[m] -> co2[m] + aclac[m]	0.0612401	0.0937237	0.0612401	0.0950954	0.0612401	0.0953639	0.0612401	0.096729
r0230	nad[m] + hyisorate[m] <=> h[m] + nadh[m] + mmshy[m]	0	0	0	0	0	0	0	0
r0231	h2o[m] + hyisocoa[m] -> h[m] + coa[m] + hyisorate[m]	0	0	0	0	0	0	0	0
r0232	nad[m] + metbycoa[m] <=> h[m] + nadh[m] + mcecoa[m]	-9.91157e-24	0	0	0	3.32944e-27	0	0	0
r0233	hmgcoa[m] -> accoa[m] + acact[m]	0	0	0	0	0	-4.01011e-27	0	0
r0234	h2o[m] + maclcoa[m] -> hyisocoa[m]	0	0	0	0	0	0	0	0
r0235	h2o[m] + mcrocoa[m] -> metbycoa[m]	-9.91071e-24	0	0	0	3.34258e-27	0	0	0
r0236	coa[c] + aaccoa[c] <=> 2 accoa[c]	-5.08519e-24	0	0	0	0	0	0	0
r0237	coa[m] + aaccoa[m] <=> 2 accoa[m]	1.23326e-25	0.207607	-1.67526e-26	0.160357	0	0.151111	0	0.104089
r0238	nad[c] + meth[c] <=> h[c] + nadh[c] + fald[c]	0	0	0	0	3.02226e-27	-6.74105e-27	0	0
r0239	3 h[c] + 4 accoa[c] + phe[c] + malcoa[c] -> 3 h2o[c] + 5 coa[c] + ota[c]	0	0	0	0	0	0	0	0
r0240	3 h[c] + nadph[c] + accoa[c] + 3 malcoa[c] -> h2o[c] + 3 co2[c] + nadp[c] + 4 coa[c] + msali[c]	0	0	0	0	0	0	0	0
r0241	h2o[e] + cellob[e] -> 2 dglc[e]	0	0	0	0	0	0	0	0
r0242	h2o[c] + oa[c] -> h[c] + ac[c] + oxal[c]	0.0191089	0.0292449	0.0191089	0.0296729	0.0191089	0.0297567	0.0191089	0.0301827
r0243	3 h[e] + chito[e] -> glua[e]	0	0	0	0	0	0	0	0
r0244	accoa[c] + ga6p[c] -> h[c] + coa[c] + nag6p[c]	0.373816	0.0632577	0.0413332	0.0641835	0.0413332	0.0643647	0.0413332	0.065286
r0245	accoa[m] + ga6p[m] -> h[m] + coa[m] + nag6p[m]	-1.07197e-17	0	0	0	0	0	0	0
r0246	h2o[c] + ga6p[c] -> nh3[c] + f6p[c]	0	0	0	0	0	0	0	0
r0247	udpnag[c] -> udp[c] + chit[c]	0.373816	0.0632577	0.0413332	0.0641835	0.0413332	0.0643647	0.0413332	0.065286
r0248	utp[c] + naga1p[c] <=> ppi[c] + udpnag[c]	0.373816	0.0632577	0.0413332	0.0641835	0.0413332	0.0643647	0.0413332	0.065286
r0249	naga1p[c] <=> nag6p[c]	-0.373816	-0.0632577	-0.0413332	-0.0641835	-0.0413332	-0.0643647	-0.0413332	-0.065286
r0250	atp[c] + glcn[c] -> h[c] + adp[c] + ga6p[c]	0.332482	0	0	0	0	0	0	0
r0251	h2o[c] + chit[c] -> nag[c]	0	0	0	0	0	0	0	0
r0252	h2o[c] + nag[c] -> ac[c] + glcn[c]	0.332482	0	0	0	0	0	0	0
r0253	4 h2o[e] + 3 chit[e] -> 3 h[e] + chito[e] + 3 ac[e]	0	0	0	0	0	0	0	0
r0254	h2o[c] + chib[c] -> 2 nag[c]	0.166241	0	0	0	0	0	0	0
r0255	h2o[e] + chib[e] -> 2 nag[e]	0	0	0	0	0	0	0	0
r0256	gln[c] + f6p[c] -> glu[c] + ga6p[c]	0.0413332	0.0632577	0.0413332	0.0641835	0.0413332	0.0643647	0.0413332	0.065286
r0257	3 h2o[e] + arabin[e] -> 3 larab[e]	0	0	0	0	0	0	0	0
r0258	gcar[c] <=> h2o[c] + 54gcar[c]	0	0	0	0	0	0	0	0
r0259	gcar[c] <=> h2o[c] + 23gcar[c]	0	0	0	0	0	0	0	0
r0260	atp[c] + coa[c] + acact[c] -> h[c] + amp[c] + ppi[c] + aaccoa[c]	-5.08507e-24	0	0	0	0	0	0	0
r0261	5 h[m] + fad[m] + cronylcoa[m] -> fadh2[m] + c40coa[m]	0	0.326163	0	0.280648	0	0.271742	0	0.226446
r0262	h[c] + aco[c] <=> co2[c] + ia[c]	0.702	0	0.702	0	0.702	0	0.702	0
r0263	coa[m] + atp[m] + cit[m] -> oa[m] + pi[m] + accoa[m] + adp[m]	0	0	0	0	0	0	0	0
r0264	nadp[m] + icit[m] -> akg[m] + nadph[m] + co2[m]	0.106592	0	0.106592	0.446168	0	0	0.106592	0.394809
r0265	nad[m] + icit[m] -> akg[m] + nadh[m] + co2[m]	0	0.489296	0	0	0.106592	0.437729	0	0
r0266	cit[m] -> oa[m] + ac[m]	0	0	0	0	0	6.66299e-18	0	0
r0267	h2o[m] + fum[m] <=> mal[m]	0.0499576	0.0764567	0.0499576	0.0775757	0.0499576	0.0777947	0.0499576	0.0789083
r0268	nad[c] + mal[c] <=> oa[c] + h[c] + nadh[c]	-984.261	-976.441	-1.51412	-1.42145	-1.51412	-1.41576	-986.445	-981.91
r0269	cit[m] <=> h2o[m] + aco[m]	0.808592	0.489296	0.808592	0.446168	0.808592	0.437729	0.808592	0.394809
r0270	h2o[m] + aco[m] <=> icit[m]	0.106592	0.489296	0.106592	0.446168	0.106592	0.437729	0.106592	0.394809
r0271	nad[m] + mal[m] <=> oa[m] + h[m] + nadh[m]	984.33	976.546	1.58319	1.5287	1.58319	1.52331	986.514	982.019
r0272	succ[m] + coa[m] + atp[m] <=> pi[m] + adp[m] + succoa[m]	0	0	0	0	0	-4.03434e-27	0	0
r0273	akg[m] + nad[m] + coa[m] -> nadh[m] + co2[m] + succoa[m]	0	0	0	0	0	0	0	0
r0274	fadh2[m] + fum[m] -> h[m] + succ[m] + fad[m]	0	0	0	0	0	0	0	0
r0275	fadh2[m] + fum[c] -> h[c] + succ[c] + fad[m]	0	0	0	0	2.28182	0	0	0
r0276	succ[m] + q[m] <=> fum[m] + qh2[m]	3.11357e-18	0	0	0	2.28182	-1.45645e-18	6.13459e-18	3.05809e-18
r0277	2pg[c] <=> h2o[c] + pep[c]	2.69381	2.30014	2.69381	2.28351	2.69381	2.28026	0.0644098	2.26371
r0278	f16p[c] <=> t3p1[c] + t3p2[c]	1.45025	1.30822	1.45025	1.30222	1.45025	1.30105	1.45025	1.29508
r0279	pi[c] + nad[c] + t3p1[c] <=> h[c] + nadh[c] + 13pdg[c]	1000	2.51694	1000	1000	2.83548	2.50086	2.87332	2.54724
r0280	atp[c] + dglc[c] -> h[c] + adp[c] + dg6p[c]	1.718	1.718	1.718	1.718	1.718	1.718	1.718	1.718
r0281	dg6p[c] <=> f6p[c]	1.57768	1.50325	1.57768	1.50011	1.57768	1.49949	1.57768	1.49636
r0282	adp[c] + 13pdg[c] <=> atp[c] + 3pg[c]	1000	2.51694	1000	1000	2.83548	2.50086	2.87332	2.54724
r0283	3pg[c] <=> 2pg[c]	2.69381	2.30014	2.69381	2.28351	2.69381	2.28026	0.0644098	2.26371
r0284	h2o[c] + f16p[c] -> pi[c] + f6p[c]	0	0	0	0	0	0	0	0
r0285	oa[c] + atp[c] -> co2[c] + adp[c] + pep[c]	0	0	0	0	0	0	0	0
r0286	adg6p[c] <=> f6p[c]	0	0	0	0	0	0	0	0
r0287	adg6p[c] <=> bdg6p[c]	0	0	0	0	0	0	0	0
r0288	atp[c] + f6p[c] -> h[c] + adp[c] + f16p[c]	1.45025	1.30822	1.45025	1.30222	1.45025	1.30105	1.45025	1.29508
r0289	atp[m] + f6p[m] -> h[m] + adp[m] + f16p[m]	0	0	0	0	0	0	0	0
r0290	h2o[c] + mnt1p[c] <=> pi[c] + mnt[c]	0.0520729	0.079694	0.0520729	0.0808604	0.0520729	0.0810886	0.0520729	0.0822494
r0291	h[c] + nadh[c] + sor[c] -> nad[c] + sot[c]	0	0	0	0	0	0	0	0
r0292	gdpman[c] -> gdp[c] + mannan[c]	0	0	0	0	0	0	0	0
r0293	nad[c] + idol[c] -> h[c] + nadh[c] + sor[c]	0	0	0	0	0	0	0	0
r0294	h2o[c] + 14mnan[c] -> man[c]	0	0	0	0	0	0	0	0
r0295	nad[c] + mnt1p[c] <=> h[c] + nadh[c] + f6p[c]	-0.0520729	-0.079694	-0.0520729	-0.0808604	-0.0520729	-0.0810886	-0.0520729	-0.0822494
r0296	atp[c] + man[c] -> h[c] + adp[c] + man6p[c]	0	0	0	0	0	0	0	0
r0297	atp[c] + dfru[c] -> h[c] + adp[c] + f6p[c]	0	0	0	0	0	0	0	0
r0298	atp[c] + f6p[c] -> h[c] + adp[c] + f26p[c]	0	0	0	0	0	0	0	0
r0299	gtp[c] + man1p[c] -> ppi[c] + gdpman[c]	0	0	0	0	0	0	0	0
r0300	h2o[c] + f26p[c] -> pi[c] + f6p[c]	0	0	0	0	0	0	0	0
r0301	h[c] + nadh[c] + dfru[c] <=> nad[c] + mnt[c]	0	0	0	0	0	0	0	0
r0302	man6p[c] <=> f6p[c]	0	0	0	0	0	0	0	0
r0303	man1p[c] <=> man6p[c]	0	0	0	0	0	0	0	0
r0304	t3p2[c] <=> t3p1[c]	998.577	1.25031	998.577	998.74	1.41241	1.24213	1.45025	1.29508
r0305	h2o[e] + epm[e] <=> gal[e] + man[e]	0	0	0	0	0	0	0	0
r0306	h2o[e] + 1dgali[e] <=> gal[e] + ins[e]	0	0	0	0	0	0	0	0
r0307	h2o[e] + ggl[e] <=> gal[e] + gl[e]	0	0	0	0	0	0	0	0
r0308	h2o[e] + melt[e] <=> gal[e] + sot[e]	0	0	0	0	0	0	0	0
r0309	2 h2o[e] + stac[e] -> gal[e] + dfru[e] + meli[e]	0	0	0	0	0	0	0	0
r0310	h[c] + nadph[c] + gal[c] <=> nadp[c] + gali[c]	0	0	0	0	0	0	0	0
r0311	atp[c] + 2d3dgalt[c] -> pyr[c] + h[c] + adp[c] + t3p1[c]	0	0	0	0	0	0	0	0
r0312	h2o[c] + o2[c] + gal[c] -> h2o2[c] + h[c] + galnt[c]	0	0	0	0	0	0	0	0
r0313	atp[c] + gal[c] -> h[c] + adp[c] + gal1p[c]	0	0	0	0	0	0	0	0
r0314	utp[c] + gal1p[c] -> ppi[c] + udpgal[c]	0	0	0	0	0	0	0	0
r0315	udpgal[c] + g1p[c] <=> gal1p[c] + udpg[c]	0	0	0	0	0	0	0	0
r0316	h2o[c] + meli[c] -> gal[c] + dglc[c]	0	0	0	0	0	0	0	0
r0317	h2o[c] + lact[c] -> gal[c] + dglc[c]	0	0	0	0	0	0	0	0
r0318	h2o[e] + lact[e] -> dglc[e] + gal[e]	0	0	0	0	0	0	0	0
r0319	h2o[e] + raff[e] -> dfru[e] + meli[e]	0	0	0	0	0	0	0	0
r0320	galnt[c] -> h2o[c] + 2d3dgalt[c]	0	0	0	0	0	0	0	0
r0321	udpgal[c] <=> udpg[c]	0	0	0	0	0	0	0	0
r0322	g1p[c] <=> dg6p[c]	-0.14032	-0.21475	-0.14032	-0.217893	-0.14032	-0.218508	-0.14032	-0.221636
r0323	h2o[e] + meli[e] -> dglc[e] + gal[e]	0	0	0	0	0	0	0	0
r0324	h2o[e] + stac[e] <=> gal[e] + raff[e]	0	0	0	0	0	0	0	0
r0325	h2o[e] + raff[e] <=> gal[e] + suc[e]	0	0	0	0	0	0	0	0
r0326	h2o[e] + suc[e] -> dglc[e] + dfru[e]	0	0	0	0	0	0	0	0
r0327	nad[c] + eth[c] <=> h[c] + nadh[c] + acal[c]	0	-1000	-1000	-1000	-1000	-1000	-1000	-1000
r0328	nadp[c] + eth[c] -> h[c] + nadph[c] + acal[c]	0	1000	1000	1000	1000	1000	1000	1000
r0329	nad[m] + eth[m] <=> h[m] + nadh[m] + acal[m]	0	0	0	0	2.14484e-18	0	0	0
r0330	bdglc[c] <=> adglc[c]	0	0	0	0	0	0	0	0
r0331	gal[c] <=> bgal[c]	0	0	0	0	0	0	0	0
r0332	larab[c] <=> arab[c]	0	0	0	0	0	0	0	0
r0333	dfru[c] <=> bdfru[c]	0	0	0	0	0	0	0	0
r0334	h[c] + adp[c] + pep[c] -> pyr[c] + atp[c]	2.6294	2.20156	2.6294	2.18349	2.6294	2.17996	0	2.16198
r0335	h2o[m] + nad[m] + acal[m] -> 2 h[m] + nadh[m] + ac[m]	0	0	0	0	2.14484e-18	0	0	0
r0336	nad[c] + llac[c] -> pyr[c] + h[c] + nadh[c]	0	0	0	0	0	0	0	0
r0337	h2o[c] + nad[c] + acal[c] -> 2 h[c] + nadh[c] + ac[c]	0	0	0	0	0	0	0	0
r0338	ac[m] + coa[m] + atp[m] -> h[m] + accoa[m] + ppi[m] + amp[m]	0	0	0	0	0	0	0	-2.69625e-26
r0339	atp[c] + coa[c] + ac[c] -> h[c] + amp[c] + ppi[c] + accoa[c]	0.351591	0.0292449	0.0191089	0.0296729	0.0191089	0.0297567	0.0191089	0.0301827
r0340	o2[m] + glya[m] -> h2o2[m] + glx[m]	0	0	0	0	0	0	0	0
r0341	nad[c] + glya[c] <=> glx[c] + h[c] + nadh[c]	-1000	-999.161	-2.86324	-1.84635	-999.991	-999.327	-1000	-999.465
r0342	h2o[c] + pglya[c] -> pi[c] + glya[c]	0	0	0	0	0	0	0	0
r0343	o2[c] + glya[c] -> h2o2[c] + glx[c]	1000	999.161	2.86324	1.84635	999.991	999.327	1000	999.465
r0344	h[c] + nadh[c] + 3hpyr[c] <=> nad[c] + g[c]	997.171	0.0105854	997.171	997.507	0.00691661	0.0107706	0.044755	0.0706907
r0345	h[c] + oxal[c] -> co2[c] + for[c]	0.0191089	0.0292449	0.0191089	0.0296729	0.0191089	0.0297567	0.0191089	0.0301827
r0346	icit[m] -> succ[m] + glx[m]	0	0	0	0	0	0	0	0
r0347	atp[c] + g[c] -> h[c] + adp[c] + 3pg[c]	0	0	0	0	0	0	0	0
r0348	h2o[m] + oa[m] + accoa[m] -> h[m] + coa[m] + cit[m]	1.47602	1.3922	1.47602	1.36228	1.47602	1.35643	1.47602	1.32666
r0349	h2o[c] + oa[c] + accoa[c] -> h[c] + coa[c] + cit[c]	0	0	0	0	0	0	0	0
r0350	nad[m] + for[m] -> nadh[m] + co2[m]	0	0	0	0	0	0	0	0
r0351	atp[c] + i4p[c] -> h[c] + adp[c] + i5p[c]	0	0	0	0	0	0	0	0
r0352	oppa[m] + nad[m] + coa[m] -> nadh[m] + co2[m] + accoa[m]	0	0	2.94356	0	0	0	0	0
r0353	atp[c] + h[c] + pinsp[c] -> adp[c] + pyi35bp[c]	0	0	0	0	0	0	0	0
r0354	nad[c] + ins[c] <=> h[c] + nadh[c] + kins[c]	0	0	0	0	0	0	0	0
r0355	atp[c] + tpi[c] -> h[c] + adp[c] + i4p[c]	0	0	0	0	0	0	0	0
r0356	2 h2o[c] + myocypi[c] -> h[c] + pi[c] + ins[c]	0	0	0	0	0	0	0	0
r0357	o2[c] + ins[c] -> h2o[c] + h[c] + glcurn[c]	0	0	0	0	0	0	0	0
r0358	h2o[m] + nad[m] + coa[m] + mmshy[m] -> nadh[m] + h[m] + hco3[m] + ppacoa[m]	0	0	0	0	0	0	0	0
r0359	atp[c] + h[c] + pins[c] -> adp[c] + pinsp[c]	0	0	0	0	0	0	0	0
r0360	h2o[c] + mi3p[c] -> pi[c] + ins[c]	0	0	0	0	0	0	0	0
r0361	h2o[c] + tpi[c] -> pi[c] + myobpi[c]	0	0	0	0	0	0	0	0
r0362	h2o[e] + i6p[e] -> pi[e] + i5p2[e]	0	0	0	0	0	0	0	0
r0363	pins[c] -> h[c] + myocypi[c] + dagly[c]	0	0	0	0	0	0	0	0
r0364	h2o[c] + ip4[c] -> pi[c] + ins[c]	0	0	0	0	0	0	0	0
r0365	dg6p[c] <=> mi3p[c]	0	0	0	0	0	0	0	0
r0366	ins[c] + cdpdg[c] -> 2 h[c] + pins[c] + cmp[c]	0	0	0	0	0	0	0	0
r0367	nad[c] + 2ddglcn[c] <=> h[c] + nadh[c] + 3d2ddglcn[c]	0	0	0	0	0	0	0	0
r0368	h[c] + nadh[c] + xyl[c] <=> nad[c] + xol[c]	999.063	-1000	998.503	997.637	1.37596	1.9014	1.37596	1.92861
r0369	nad[c] + xol[c] -> h[c] + nadh[c] + xul[c]	0	0	-4.12458e-14	0	0	0	0	0
r0370	nad[c] + sot[c] -> h[c] + nadh[c] + dfru[c]	0	0	0	0	0	0	0	0
r0371	sot[e] + nad[e] -> h[e] + dfru[e] + nadh[e]	0	0	0	0	0	0	0	0
r0372	h2o[c] + nad[c] + fald[c] -> 2 h[c] + nadh[c] + for[c]	0	0	0	0	0	0	0	0
r0373	nad[c] + laol[c] <=> h[c] + nadh[c] + lxul[c]	0	0	0	0	0	0	0	0
r0374	h[c] + nadph[c] + larab[c] <=> nadp[c] + laol[c]	0	0	0	0	0	0	0	0
r0375	h[c] + nadph[c] + xyl[c] <=> nadp[c] + xol[c]	-999.063	1000	-998.503	-997.637	-1.37596	-1.9014	-1.37596	-1.92861
r0376	h[c] + nadph[c] + arab[c] -> nadp[c] + aol[c]	0	0	0	0	0	0	0	0
r0377	h2o[c] + 2 nad[c] + udpg[c] -> 3 h[c] + 2 nadh[c] + udpge[c]	0	0	0	0	0	0	0	0
r0378	h[c] + nadph[c] + lxul[c] <=> nadp[c] + xol[c]	0	0	0	0	0	0	0	0
r0379	h2o[c] + glucur[c] -> h[c] + eth[c] + glcurn[c]	0	0	0	0	0	0	0	0
r0380	nad[c] + ribol[c] -> h[c] + nadh[c] + rl[c]	0	0	0	0	0	0	0	0
r0381	nadp[c] + ribol[c] -> h[c] + nadph[c] + rl[c]	0	0	0	0	0	0	0	0
r0382	h[c] + nadh[c] + frutn[c] <=> nad[c] + manoe[c]	0	0	0	0	0	0	0	0
r0383	h[c] + nadph[c] + rib[c] <=> nadp[c] + ribol[c]	0	0	0	0	0	0	0	0
r0384	r1p[c] <=> r5p[c]	0	4.8706e-28	-5.01408e-28	0	-1.20411e-24	2.2235e-26	1.29122e-28	1.23881e-25
r0385	atp[c] + xul[c] -> h[c] + adp[c] + x5p[c]	0	0	-4.12458e-14	0	0	0	0	0
r0386	utp[c] + g1p[c] <=> ppi[c] + udpg[c]	0.14032	0.21475	0.14032	0.217893	0.14032	0.218508	0.14032	0.221636
r0387	lrl5p[c] <=> x5p[c]	0	0	0	0	0	0	0	0
r0388	h2o[e] + g15l[e] -> glcnt[e]	0	0	0	0	0	0	0	0
r0389	h[c] + adp[c] + dor5p[c] <=> atp[c] + doris[c]	0	0	0	0	0	0	0	0
r0390	atp[c] + glcnt[c] -> h[c] + adp[c] + d6pgc[c]	0	0	0	0	0	0	0	0
r0391	o2[e] + dglc[e] <=> h2o2[e] + g15l[e]	0	0	0	0	0	0	0	0
r0392	atp[c] + rib[c] -> h[c] + adp[c] + r5p[c]	0	0	0	0	0	0	0	0
r0393	dor5p[c] <=> acal[c] + t3p1[c]	0	0	0	0	0	0	0	0
r0394	t3p1[c] + s7p[c] <=> e4p[c] + f6p[c]	-0.000911949	-0.00139568	-0.000911949	-0.0014161	-0.000911949	-0.0014201	-0.000911949	-0.00144043
r0395	e4p[c] + x5p[c] <=> t3p1[c] + f6p[c]	-0.0331169	-0.0506831	-0.0331169	-0.0514249	-0.0331169	-0.05157	-0.0331169	-0.0523083
r0396	rl5p[c] <=> r5p[c]	0.0340288	0.0520788	0.0340288	0.052841	0.0340288	0.0529901	0.0340288	0.0537487
r0397	h2o[e] + d6pgl[e] -> h[e] + d6pgc[e]	0	0	0	0	0	0	0	0
r0398	nadp[c] + d6pgc[c] -> co2[c] + nadph[c] + rl5p[c]	0	0	0	0	0	0	0	0
r0399	h2o[c] + d6pgl[c] -> h[c] + d6pgc[c]	1.60374e-24	0	0	0	-1.48308e-24	0	0	5.24891e-23
r0400	r5p[c] + x5p[c] <=> t3p1[c] + s7p[c]	-0.000911949	-0.00139568	-0.000911949	-0.0014161	-0.000911949	-0.0014201	-0.000911949	-0.00144043
r0401	nadp[c] + dg6p[c] -> h[c] + nadph[c] + d6pgl[c]	1.59704e-24	0	0	0	-1.46632e-24	0	0	5.24906e-23
r0402	rl5p[c] <=> x5p[c]	-0.0340288	-0.0520788	-0.0340288	-0.052841	-0.0340288	-0.0529901	-0.0340288	-0.0537487
r0403	2micit[c] <=> pyr[c] + succ[c]	0	0	0	0	0	0	0	0
r0404	oppa[m] + nadp[m] + coa[m] <=> h[m] + nadph[m] + malcoa[m]	0	0	-2.94356	-1.19556e-24	0	0	0	0
r0405	h2o[m] + 2maco[m] <=> 2micit[m]	-9.91088e-24	0	0	0	3.34246e-27	0	0	0
r0406	h[m] + coa[m] + 2mcit[m] <=> h2o[m] + oa[m] + ppacoa[m]	9.91084e-24	0	0	0	-3.34126e-27	0	0	0
r0407	2micit[m] <=> pyr[m] + succ[m]	-9.9106e-24	0	0	0	3.34222e-27	0	0	0
r0408	2mcit[m] -> h2o[m] + 2maco[m]	-9.91088e-24	0	0	0	3.34246e-27	0	0	0
r0409	nad[c] + lac[c] <=> pyr[c] + h[c] + nadh[c]	983.23	979.003	0.4828	3.85848	0.811139	3.78282	988.047	984.114
r0410	lac[m] + 2 feri[m] -> pyr[m] + 2 fero[m]	0	0	0	0	0	0	0	0
r0411	pyr[m] + nad[m] + coa[m] -> nadh[m] + co2[m] + accoa[m]	1.5488	1.29596	1.5488	1.31493	1.5488	1.31864	1.5488	1.33752
r0412	h2o[c] + pyr[c] + atp[c] + co2[c] -> oa[c] + 2 h[c] + pi[c] + adp[c]	0.865801	0.576849	0.865801	0.535003	0.865801	0.526815	0.865801	0.485171
r0413	2 feri[m] + llac[m] -> pyr[m] + 2 h[m] + 2 fero[m]	0	0	0	0	0	0	0	0
r0414	nad[m] + lac[m] <=> pyr[m] + h[m] + nadh[m]	-983.23	-979.003	-0.4828	-3.85848	-0.811139	-3.78282	-988.047	-984.114
r0415	h2o[c] + nadp[c] + acal[c] -> 2 h[c] + nadph[c] + ac[c]	0	0	0	0	0	0	0	0
r0416	h2o[c] + lgt[c] -> h[c] + lac[c] + gsh[c]	0	0	0	0	0	0	0	0
r0417	pyr[c] + h[c] -> co2[c] + acal[c]	0.0393595	0.060237	0.0393595	0.0611186	0.0393595	0.0612912	0.0393595	0.0621685
r0418	lgt[c] <=> mgxl[c] + gsh[c]	0	0	0	0	0	0	0	0
r0419	h2o[c] + accoa[c] -> h[c] + coa[c] + ac[c]	0	0	0	0	0	0	0	0
r0420	h2o[m] + accoa[m] -> h[m] + ac[m] + coa[m]	0	0	0	0	0	0	0	0
r0421	h2o[m] + accoa[m] + glx[m] -> h[m] + coa[m] + mal[m]	0.0191089	0.0292449	0.0191089	0.0296729	0.0191089	0.0297567	0.0191089	0.0301827
r0422	accoa[m] + atp[m] + hco3[m] <=> h[m] + pi[m] + adp[m] + malcoa[m]	0	0	2.94356	1.19554e-24	0	0	0	0
r0423	atp[c] + accoa[c] + hco3[c] <=> h[c] + pi[c] + adp[c] + malcoa[c]	0.567742	0.750334	0.567742	0.761315	0.567742	0.763464	0.567742	0.774393
r0424	nad[c] + mal[c] -> pyr[c] + co2[c] + nadh[c]	0	0	0	0	0	0	0	0
r0425	nadp[m] + mal[m] -> pyr[m] + nadph[m] + co2[m]	0	0	0	0	0	0	0	0
r0426	h2o[c] + pyr[c] + atp[c] -> 3 h[c] + amp[c] + pi[c] + pep[c]	0	0	0	0	0	0	0	0
r0427	h2o[m] + pyr[m] + atp[m] -> 3 h[m] + pi[m] + amp[m] + pep[m]	0	0	0	0	0	0	0	0
r0428	h2o[e] + 13glucan[e] -> dglc[e]	0	0	0	0	0	0	0	0
r0429	14glucan[c] -> h2o[c] + glycogen[c]	0.000233301	0.000357052	0.000233301	0.000362278	0.000233301	0.0003633	0.000233301	0.000368501
r0430	h2o[c] + star[c] -> adglc[c] + 14glucan[c]	0	0	0	0	0	0	0	0
r0431	mltiose[c] + mlt[c] <=> dglc[c] + mltose[c]	0	0	0	0	0	0	0	0
r0432	pi[c] + mltose[c] -> g1p[c] + mltiose[c]	0	0	0	0	0	0	0	0
r0433	pi[c] + glycogen[c] -> g1p[c]	0	0	0	0	0	0	0	0
r0434	udpg[c] -> udp[c] + 14glucan[c]	0.000233301	0.000357052	0.000233301	0.000362278	0.000233301	0.0003633	0.000233301	0.000368501
r0435	udpg[c] -> udp[c] + glycogen[c]	0	0	0	0	0	0	0	0
r0436	udpg[c] -> udp[c] + 13glucan[c]	0.140087	0.214393	0.140087	0.217531	0.140087	0.218145	0.140087	0.221267
r0437	h2o[c] + 2 chit[c] -> chib[c]	0.166241	0	0	0	0	0	0	0
r0438	h2o[e] + 2 chit[e] -> chib[e]	0	0	0	0	0	0	0	0
r0439	h2o[c] + mltiose[c] -> dglc[c] + mlt[c]	0	0	0	0	0	0	0	0
r0440	h2o[c] + cellob[c] -> 2 dglc[c]	0	0	0	0	0	0	0	0
r0441	glycogen[e] -> dglc[e]	0	0	0	0	0	0	0	0
r0442	h2o[e] + star[e] -> dglc[e]	0	0	0	0	0	0	0	0
r0443	xylan[e] -> xyl[e]	0	0	0	0	0	0	0	0
r0444	xylan[c] -> xyl[c]	0	0	0	0	0	0	0	0
r0445	2 h[e] + cellu[e] -> h2o[e] + 13glucan[e]	0	0	0	0	0	0	0	0
r0446	cellob[e] -> h2o[e] + 2 13glucan[e]	0	0	0	0	0	0	0	0
r0447	h2o[e] + 13glucan[e] -> adglc[e]	0	0	0	0	0	0	0	0
r0448	12 h[e] + 6 cellu[e] -> 3 h2o[e] + cellob[e] + dglc[e] + cellot[e]	0	0	0	0	0	0	0	0
r0449	udpg[c] + dg6p[c] -> udp[c] + tre6p[c]	0	0	0	0	0	0	0	0
r0450	h2o[c] + mlt[c] -> 2 dglc[c]	0	0	0	0	0	0	0	0
r0451	h2o[e] + mlt[e] -> 2 dglc[e]	0	0	0	0	0	0	0	0
r0452	h2o[c] + tre6p[c] -> pi[c] + tre[c]	0	0	0	0	0	0	0	0
r0453	h2o[c] + tre[c] -> 2 dglc[c]	0	0	0	0	0	0	0	0
r0454	h2o[e] + tre[e] -> 2 dglc[e]	0	0	0	0	0	0	0	0
r0455	h2o[e] + ptate[e] -> galunt[e]	0	0	0	0	0	0	0	0
r0456	h2o[c] + nad[c] + glyal[c] <=> 2 h[c] + nadh[c] + g[c]	-997.171	-0.0105854	-997.171	-997.507	-0.00691661	-0.0107706	-0.044755	-0.0706907
r0457	atp[c] + ac[c] -> adp[c] + acpi[c]	0	0	0	0	0	0	0	0
r0458	atp[c] + co2[c] + danna[c] -> 3 h[c] + pi[c] + adp[c] + dtb[c]	0	0	0	0	0	0	0	0
r0459	co2[m] + atp[m] + danna[m] -> 3 h[m] + pi[m] + adp[m] + dtb[m]	0	0	0	0	0	0	0	0
r0460	2 sam[m] + dtb[m] + s[m] -> 2 met[m] + bt[m] + 2 da[m]	0	0	0	0	0	0	0	0
r0461	atp[c] + bt[c] -> ppi[c] + btamp[c]	0	0	0	0	0	0	0	0
r0462	btamp[c] -> amp[c] + bccp[c]	0	0	0	0	0	0	0	0
r0463	6 h[c] + 4 nadph[c] + 3 malcoa[c] -> 2 h2o[c] + 2 co2[c] + 4 nadp[c] + 2 coa[c] + chcoa[c]	0	0	0	0	0	0	0	0
r0464	ala[c] + h[c] + chcoa[c] -> co2[c] + coa[c] + aona[c]	0	0	0	0	0	0	0	0
r0465	sam[m] + aona[m] -> danna[m] + samob[m]	0	0	0	0	0	0	0	0
r0466	sam[c] + aona[c] -> danna[c] + samob[c]	0	0	0	0	0	0	0	0
r0467	2 sam[c] + dtb[c] + s[c] -> 2 met[c] + bt[c] + 2 da[c]	0	0	0	0	0	0	0	0
r0468	h2o[m] + gtp[m] -> h[m] + for[m] + ahtd[m]	0	0	0	0	0	0	0	0
r0469	abee[c] + ahhmp[c] -> h2o[c] + dhpt[c]	0	0	0	0	0	0	0	0
r0470	2 h[c] + 2 nadph[c] + fot[c] -> 2 nadp[c] + thf[c]	0.000619026	0.000947377	0.000619026	0.000961243	0.000619026	0.000963956	0.000619026	0.000977755
r0471	nadp[c] + dhf[c] <=> h[c] + nadph[c] + fot[c]	0.000619026	0.000947377	0.000619026	0.000961243	0.000619026	0.000963956	0.000619026	0.000977755
r0472	glu[c] + atp[c] + dhpt[c] -> h[c] + pi[c] + adp[c] + dhf[c]	0	0	0	0	0	0	0	0
r0473	h[m] + nadph[m] + dhf[m] <=> nadp[m] + thf[m]	0	0	0	0	0	0	0	0
r0474	h[c] + nadph[c] + dhf[c] -> nadp[c] + thf[c]	0	0	0	0	0	0	0	0
r0475	ahhmd[c] + abee[c] -> h[c] + ppi[c] + dhpt[c]	0	0	0	0	0	0	0	0
r0476	atp[c] + ahhmp[c] -> h[c] + amp[c] + ahhmd[c]	0	0	0	0	0	0	0	0
r0477	3 h2o[c] + ahtd[c] -> 3 h[c] + 3 pi[c] + dhp[c]	0	0	0	0	0	0	0	0
r0478	h2o[c] + gtp[c] -> h[c] + for[c] + ahtd[c]	0	0	0	0	0	0	0	0
r0479	dhp[c] -> ahhmp[c] + glal[c]	0	0	0	0	0	0	0	0
r0480	h2o[c] + d6pgc[c] -> pi[c] + glcnt[c]	0	0	0	0	0	0	0	0
r0481	nadh[m] + atp[m] -> h[m] + nadph[m] + adp[m]	0	0	0	0	0	0	0	0
r0482	atp[c] + nmn[c] <=> ppi[c] + nad[c]	0	0	0	0	1.72212e-27	-8.61062e-28	0	0
r0483	prpp[c] + nica[c] <=> ppi[c] + ncn[c]	0	0	0	0	-1.19043e-24	2.26626e-26	0	0
r0484	h[c] + prpp[c] + qa[c] -> ppi[c] + co2[c] + ncn[c]	0	0	0	0	0	0	0	0
r0485	atp[c] + nad[c] -> h[c] + nadp[c] + adp[c]	2.70296e-13	1.0026e-13	-8.08886e-13	-3.19509e-13	2.54147e-13	-6.80104e-14	-1.10873e-13	-2.34847e-13
r0486	atp[c] + ncn[c] <=> ppi[c] + dmnad[c]	0	0	0	0	0	0	0	0
r0487	asp[c] + nadp[c] -> 2 h[c] + nadph[c] + iasp[c]	0	0	0	0	0	0	0	0
r0488	pi[c] + nar[c] <=> h[c] + r1p[c] + nica[c]	0	0	0	0	-1.19171e-24	2.23876e-26	0	0
r0489	pi[c] + nnr[c] <=> h[c] + r1p[c] + nicd[c]	0	0	0	0	-1.72212e-27	8.61062e-28	0	0
r0490	h2o[c] + gln[c] + atp[c] + dmnad[c] -> glu[c] + 2 h[c] + amp[c] + ppi[c] + nad[c]	0	0	0	0	0	0	0	0
r0491	nadph[m] + nad[m] <=> nadp[m] + nadh[m]	-0.0910995	-0.281457	-3.01715	0.225736	-2.46199	-0.25911	-0.0598014	0.13199
r0492	h2o[c] + nmn[c] -> pi[c] + nnr[c]	0	0	0	0	-1.72212e-27	8.61062e-28	0	0
r0493	h2o[c] + ncn[c] -> pi[c] + nar[c]	0	0	0	0	0	0	0	0
r0494	h2o[c] + nicd[c] -> nh3[c] + nica[c]	0	0	0	0	-1.72212e-27	8.61062e-28	0	0
r0495	h2o[c] + nad[c] -> 2 h[c] + amp[c] + nmn[c]	0	0	0	0	0	0	0	0
r0496	atp[c] + foli[c] -> pi[c] + adp[c] + methf[c]	0	0	0	0	0	0	0	0
r0497	nadph[c] + methf[c] <=> nadp[c] + metthf[c]	999.97	-1.80801	999.97	999.953	999.97	999.953	999.97	999.952
r0498	atp[c] + thf[c] + for[c] -> pi[c] + adp[c] + fthf[c]	0	0	0	0	0	0	0	0
r0499	atp[m] + thf[m] + for[m] -> pi[m] + adp[m] + fthf[m]	0.0191089	0.0292449	0.0191089	0.0296729	0.0191089	0.0297567	0.0191089	0.0301827
r0500	nad[c] + metthf[c] <=> nadh[c] + methf[c]	1000	-1.7615	1000	1000	1000	1000	1000	1000
r0501	h[m] + nadph[m] + metthf[m] <=> nadp[m] + mthf[m]	0	0	0	0	0	0	0	0
r0502	h[c] + nadph[c] + metthf[c] <=> nadp[c] + mthf[c]	0.0458266	0.0701345	0.0458266	0.071161	0.0458266	0.0713618	0.0458266	0.0723834
r0503	nadph[m] + methf[m] <=> nadp[m] + metthf[m]	0.0191089	0.0292449	0.0191089	0.0296729	0.0191089	0.0297567	0.0191089	0.0301827
r0504	h[m] + fthf[m] <=> h2o[m] + methf[m]	0.0191089	0.0292449	0.0191089	0.0296729	0.0191089	0.0297567	0.0191089	0.0301827
r0505	h[c] + fthf[c] <=> h2o[c] + methf[c]	-0.0303898	-0.0465096	-0.0303898	-0.0471903	-0.0303898	-0.0473235	-0.0303898	-0.0480009
r0506	h2o[c] + fthf[c] -> h[c] + thf[c] + for[c]	0	0	0	0	0	0	0	0
r0507	h2o[c] + methf[c] + gar[c] -> 2 h[c] + thf[c] + fgar[c]	0	0	0	0	0	0	0	0
r0508	fthf[c] + gar[c] -> h[c] + thf[c] + fgar[c]	0.0102824	0.0157365	0.0102824	0.0159668	0.0102824	0.0160118	0.0102824	0.0162411
r0509	aicar[c] + fthf[c] -> thf[c] + prfica[c]	0.0201075	0.0307731	0.0201075	0.0312235	0.0201075	0.0313116	0.0201075	0.0317598
r0510	atp[c] + coa[c] + cit[c] -> oa[c] + pi[c] + accoa[c] + adp[c]	0.667432	0.902902	0.667432	0.916117	0.667432	0.918703	0.667432	0.931854
r0511	atp[c] + pnto[c] -> h[c] + adp[c] + ppnto[c]	0	0	0	0	0	0	0	0
r0512	cys[c] + ctp[c] + ppnto[c] -> 2 h[c] + ppi[c] + cmp[c] + ppntocys[c]	0	0	0	0	0	0	0	0
r0513	h[c] + ppntocys[c] -> co2[c] + ppthe[c]	0	0	0	0	0	0	0	0
r0514	atp[c] + ppthe[c] -> ppi[c] + dpcoa[c]	0	0	0	0	0	0	0	0
r0515	dhival[m] -> h2o[m] + oival[m]	0	0	0	0	0	0	0	0
r0516	h[m] + nadph[m] + aclac[m] -> nadp[m] + dhival[m]	0	0	0	0	0	0	0	0
r0517	atp[c] + pant[c] + bala[c] -> 2 h[c] + amp[c] + ppi[c] + pnto[c]	0	0	0	0	0	0	0	0
r0518	h2o[c] + metthf[c] + oival[c] -> thf[c] + akp[c]	0	0	0	0	0	0	0	0
r0519	h2o[m] + metthf[m] + oival[m] -> thf[m] + akp[m]	0	0	0	0	0	0	0	0
r0520	h[c] + nadph[c] + akp[c] <=> nadp[c] + pant[c]	0	0	0	0	0	0	0	0
r0521	h[m] + nadph[m] + akp[m] <=> nadp[m] + pant[m]	0	0	0	0	0	0	0	0
r0522	atp[c] + dpcoa[c] -> h[c] + coa[c] + adp[c]	0	0	0	0	0	0	0	0
r0523	nad[c] + dmand[c] <=> h[c] + nadh[c] + bfor[c]	0	0	0	0	0	0	0	0
r0524	h2o[c] + 2 h[c] + uppe[c] -> nh3[c] + co2[c] + bala[c]	0	0	0	0	0	0	0	0
r0525	h2o[c] + dhura[c] -> h[c] + uppe[c]	0	0	0	0	0	0	0	0
r0526	glu[c] + atp[c] + glutrna[c] <=> h[c] + amp[c] + ppi[c] + lglutrna[c]	0	0	0	0	0	0	0	0
r0527	glu1sal[m] -> amievul[m]	0	0	0	0	0	0	0	0
r0528	upgi[c] -> 4 co2[c] + cpgi[c]	0	0	0	0	0	0	0	0
r0529	4 h[m] + upgiii[m] -> 4 co2[m] + cpgiii[m]	0	0	0	0	0	0	0	0
r0530	glu1sal[c] -> amievul[c]	0	0	0	0	0	0	0	0
r0531	h2o[m] + hemeo[m] -> 4 h[m] + hemea[m]	0	0	0	0	0	0	0	0
r0532	nad[c] + precor[c] -> 2 h[c] + nadh[c] + shcr[c]	0	0	0	0	0	0	0	0
r0533	o2[m] + 2 h[m] + cpgiii[m] -> 2 h2o[m] + 2 co2[m] + ppgix[m]	0	0	0	0	0	0	0	0
r0534	3 o2[m] + ppgix[m] -> 3 h2o2[m] + pprix[m]	0	0	0	0	0	0	0	0
r0535	2 sam[c] + upgiii[c] -> h[c] + 2 sah[c] + precor[c]	0	0	0	0	0	0	0	0
r0536	h[m] + gly[m] + succoa[m] -> co2[m] + coa[m] + amievul[m]	0	0	0	0	0	0	0	0
r0537	h2o[m] + hemeb[m] + fpp[c] -> h[m] + ppi[m] + hemeo[m]	0	0	0	0	0	0	0	0
r0538	h2o[c] + 4 ppbg[c] -> 4 nh3[c] + hmtb[c]	0	0	0	0	0	0	0	0
r0539	4 h[c] + upgiii[c] -> 4 co2[c] + cpgiii[c]	0	0	0	0	0	0	0	0
r0540	2 amievul[c] -> 2 h2o[c] + h[c] + ppbg[c]	0	0	0	0	0	0	0	0
r0541	2 h[m] + hemeb[m] + apoce[m] -> cytc[m]	0	0	0	0	0	0	0	0
r0542	pprix[m] + fe[c] -> 2 h[c] + hemeb[m]	0	0	0	0	0	0	0	0
r0543	shcr[c] + fe[c] -> 2 h[c] + sihm[c]	0	0	0	0	0	0	0	0
r0544	3 h2o[m] + gtp[m] -> 3 h[m] + ppi[m] + for[m] + d6rp5p[m]	0	0	0	0	0	0	0	0
r0545	h[c] + nadh[c] + d6rp5p[c] <=> nad[c] + d6pr5po[c]	0	0	0	0	0	0	0	0
r0546	h[c] + 2 dmlr[c] -> aura[c] + vb2[c]	0	0	0	0	0	0	0	0
r0547	h[c] + nadph[c] + a6rp5p[c] -> nadp[c] + a6rp5p2[c]	0	0	0	0	0	0	0	0
r0548	atp[c] + vb2[c] -> h[c] + adp[c] + fmn[c]	0	0	0	0	0	0	0	0
r0549	atp[c] + fmn[c] -> ppi[c] + fad[c]	0	0	0	0	0	0	0	0
r0550	3 h2o[c] + gtp[c] -> 3 h[c] + ppi[c] + for[c] + d6rp5p[c]	0	0	0	0	0	0	0	0
r0551	rl5p[c] -> h[c] + for[c] + db4p[c]	0	0	0	0	0	0	0	0
r0552	h2o[m] + t3p2[m] <=> pi[m] + glyn[m]	0	0	0	0	0	0	0	0
r0553	h2o[c] + fmn[c] -> pi[c] + vb2[c]	0	0	0	0	0	0	0	0
r0554	d8rl[c] -> vb2[c] + a6rp[c]	0	0	0	0	0	0	0	0
r0555	h2o[e] + fmn[e] -> pi[e] + vb2[e]	0	0	0	0	0	0	0	0
r0556	atp[c] + thdp[c] -> adp[c] + thtp[c]	0	0	0	0	0	0	0	0
r0557	2 atp[c] + top[c] -> 2 adp[c] + ahmpp[c]	0	0	0	0	0	0	0	0
r0558	air[c] -> pi[c] + ac[c] + top[c]	0	0	0	0	0	0	0	0
r0559	thzp[c] + ahmpp[c] -> ppi[c] + thmp[c]	0	0	0	0	0	0	0	0
r0560	atp[c] + thz[c] -> h[c] + adp[c] + thzp[c]	0	0	0	0	0	0	0	0
r0561	atp[c] + thm[c] -> h[c] + amp[c] + thdp[c]	0	0	0	0	0	0	0	0
r0562	sam[m] + mpyq[m] -> h[m] + sah[m] + dmpyq[m]	0	0	0	0	0	0	0	0
r0563	homogen[m] + pypp[m] -> co2[m] + ppi[m] + mpyq[m]	0	0	0	0	0	0	0	0
r0564	sam[m] + omhmb[m] -> h[m] + q[m] + sah[m]	0	0	0	0	0	0	0	0
r0565	sam[m] + ohphl[m] -> h[m] + om[m] + sah[m]	0	0	0	0	0	0	0	0
r0566	o2[m] + nadph[m] + om[m] -> h2o[m] + nadp[m] + h[m] + omb[m]	0	0	0	0	0	0	0	0
r0567	o2[m] + h[m] + nadph[m] + ommb[m] -> h2o[m] + nadp[m] + omhmb[m]	0	0	0	0	0	0	0	0
r0568	sam[m] + omb[m] -> h[m] + ommb[m] + sah[m]	0	0	0	0	0	0	0	0
r0569	4hba[m] + npp[m] -> h[m] + ppi[m] + n4hbz[m]	0	0	0	0	0	0	0	0
r0570	atp[c] + pdxal[c] -> h[c] + adp[c] + plp[c]	0	0	0	0	0	0	0	0
r0571	atp[c] + pdxam[c] -> h[c] + adp[c] + pdxam5pi[c]	0	0	0	0	0	0	0	0
r0572	atp[c] + pdxi[c] -> h[c] + adp[c] + pdxi5pi[c]	0	0	0	0	0	0	0	0
r0573	nadp[c] + pdxi[c] <=> h[c] + nadph[c] + pdxal[c]	1000	1000	1000	1000	1000	1000	1000	1000
r0574	akg[c] + pht[c] <=> glu[c] + ohpbt[c]	0	0	0	0	0	0	0	0
r0575	h2o[c] + pht[c] -> pi[c] + hthr[c]	0	0	0	0	0	0	0	0
r0576	t3p1[c] + rl5p[c] -> pi[c] + plp[c]	0	0	0	0	0	0	0	0
r0577	h2o[c] + o2[c] + pdxam5pi[c] -> h2o2[c] + nh3[c] + plp[c]	0	0	0	0	0	0	0	0
r0578	o2[c] + pdxi5pi[c] -> h2o2[c] + plp[c]	0	0	0	0	0	0	0	0
r0579	o2[c] + pdxi[c] <=> h2o2[c] + pdxal[c]	-1000	-1000	-1000	-1000	-1000	-1000	-1000	-1000
r0580	h2o[c] + o2[c] + pdxam[c] <=> h2o2[c] + nh3[c] + pdxal[c]	0	0	0	0	0	0	0	0
r0581	gln[c] + t3p1[c] + rl5p[c] -> 3 h2o[c] + glu[c] + h[c] + pi[c] + plp[c]	0	0	0	0	0	0	0	0
etf-qo	fadh2[m] + q[m] -> h[m] + fad[m] + qh2[m]	0	0	0	0	0	0	0	0
oxids alte	0.5 o2[m] + qh2[m] -> h2o[m] + q[m]	0	0	0	0	0	0	0	0
r0582	o2[c] + h[c] + nadph[c] -> h2o2[c] + nadp[c]	0	0	0	0	0	0	0	0
r0583	h[c] + nadph[c] + q[m] -> nadp[c] + qh2[m]	0	0	0	0	0	0	0	0
tr_atp/adp	pi[c] + adp[c] + atp[m] -> atp[c] + pi[m] + adp[m]	1000	1000	14.3097	22.5222	13.9947	21.9901	1000	1000
tr_na	h2o[c] + atp[c] + na[c] -> h[c] + pi[c] + adp[c] + na[e]	0	0	0	0	0	0	0	0
r0584	fald[c] + gsh[c] -> hygta[c]	0	0	0	0	0	0	0	0
r0585	h2o2[c] + meth[c] -> 2 h2o[c] + fald[c]	0	0	0	0	0	0	0	0
r0586	2 h2o2[e] -> 2 h2o[e] + o2[e]	0	0	0	0	0	0	0.26824	0
r0587	o2[c] + meth[c] -> h2o2[c] + fald[c]	0	0	0	0	0	0	0	0
r0588	o2[c] + eth[c] -> h2o2[c] + acal[c]	0	2.18108e-13	0	0	0	0	0	0
r0589	o2[c] + gl[c] -> h2o2[c] + glyal[c]	0	0	0	0	0	0	0	0
r0590	o2[c] + gl[c] -> h2o2[c] + glyn[c]	0	0	0	0	0	0	0	0
r0591	2 h2o2[c] -> 2 h2o[c] + o2[c]	0	0	0	0	0	0	0	0
r0592	t3p1[c] + glyn[c] <=> fald[c] + x5p[c]	0	0	0	0	0	0	0	0
r0593	nad[c] + hygta[c] -> h[c] + nadh[c] + fgt[c]	0	0	0	0	0	0	0	0
r0594	nadp[c] + hygta[c] -> h[c] + nadph[c] + fgt[c]	0	0	0	0	0	0	0	0
r0595	h2o[c] + fgt[c] <=> h[c] + for[c] + gsh[c]	0	0	0	0	0	0	0	0
r0596	h2o2[c] + eth[c] -> 2 h2o[c] + acal[c]	0	0	0	0	0	0	0	0
r0597	2 h[e] + hco3[e] + cyan[e] -> nh3[e] + 2 co2[e]	0	0	0	0	0	0	0	0
r0598	h2o[e] + co2[e] -> h[e] + hco3[e]	0	0	0	0	0	0	0	0
r0599	nh4oh[c] <=> h2o[c] + nh3[c]	-0.0035213	-0.0053891	-0.0035213	-0.00546798	-0.0035213	-0.00548341	-0.0035213	-0.0055619
r0600	h[c] + hco3[c] <=> h2o[c] + co2[c]	-0.601614	-0.802173	996.455	999.186	-0.601614	-0.816211	999.398	999.172
r0601	h2o[c] + atp[c] + co2[c] + urea[c] <=> 2 h[c] + pi[c] + adp[c] + ureac[c]	0	0	0	0	0	0	0	0
r0602	h[c] + nadph[c] + hno3[c] -> h2o[c] + nadp[c] + hno2[c]	0	0	0	0	0	0	0	0
r0603	5 h[c] + 3 nadph[c] + hno2[c] -> h2o[c] + 3 nadp[c] + nh4oh[c]	0	0	0	0	0	0	0	0
r0604	5 h[c] + 3 nadh[c] + hno2[c] -> h2o[c] + 3 nad[c] + nh4oh[c]	0	0	0	0	0	0	0	0
r0605	h2o[c] + 2 h[c] + urea[c] -> 2 nh3[c] + co2[c]	0	0	0	0	0	0	0	0
r0606	h2o[c] + co2[c] -> h[c] + hco3[c]	0	0	1000	1000	0	0	1000	1000
r0607	h[c] + nadh[c] + hno3[c] -> h2o[c] + nad[c] + hno2[c]	0	0	0	0	0	0	0	0
r0608	nh3[c] + glu[c] + atp[c] -> gln[c] + h[c] + pi[c] + adp[c]	0.146527	0.22425	0.15045	0.227532	0.146527	0.228174	0.146527	0.231441
r0609	h2o[c] + frid[c] -> nh3[c] + for[c]	0	0	0	0	0	0	0	0
cyto-c	0.5 o2[m] + 6 h[m] + 2 fero[m] -> h2o[m] + 4 h[c] + 2 feri[m]	2.61904	3.39449	2.61904	3.04186	2.61904	2.97285	2.08256	2.62193
f-atpase	4.7 h[c] + pi[m] + adp[m] -> h2o[m] + 4.7 h[m] + atp[m]	15.8076	23.6642	15.8076	21.1693	12.5491	20.6811	13.6231	18.1981
h-atpase	h2o[c] + atp[c] + 3 h[c] -> pi[c] + adp[c] + 4 h[e]	0	0	0	0	0	0	0	0
nadh-q cyto	5 h[m] + nadh[c] + q[m] -> 4 h[c] + nad[c] + qh2[m]	0	3.39449	0	3.04186	0.337229	2.97285	2.08256	2.62193
nadh-q cyto alter	h[c] + nadh[c] + q[m] -> nad[c] + qh2[m]	0	0	0	0	0	0	0	0
nadh-q mito	5 h[m] + nadh[m] + q[m] -> nad[m] + 4 h[c] + qh2[m]	2.61904	0	2.61904	0	0	0	0	0
nadh-q mito alter	h[m] + nadh[m] + q[m] -> nad[m] + qh2[m]	0	0	0	0	0	0	0	0
q-cyto-c	2 h[m] + qh2[m] + 2 feri[m] -> 4 h[c] + q[m] + 2 fero[m]	2.61904	3.39449	2.61904	3.04186	2.61904	2.97285	2.08256	2.62193
r0610	h2o[c] + ppi[c] -> h[c] + 2 pi[c]	1.35066	1.88824	0.685692	1.76501	0.685692	1.7409	0.685692	1.61826
r0611	h2o[m] + ppi[m] -> h[m] + 2 pi[m]	0	0	0	0	0	0	0	-2.69625e-26
tr_ca	h2o[c] + atp[c] + ca[e] -> h[c] + pi[c] + adp[c] + ca[c]	0	0	0	0	0	0	0	0
tr_cu	h2o[c] + atp[c] + cu[c] -> h[c] + pi[c] + adp[c] + cu[e]	0	0	0	0	0	0	0	0
tr_k	h2o[c] + atp[c] + k[e] -> pi[c] + adp[c] + h[e] + k[c]	0	0	0	0	0	0	0	0
r0612	h2o[c] + o2[c] + slfi[c] -> h2o2[c] + h[c] + slf[c]	0	0.838837	0	0.700247	0	0.673129	0	0.535208
r0613	h2o[c] + paps[c] -> pi[c] + aps[c]	0	0	0	0	0	0	0	0
r0614	3 h2o[c] + 3 nadp[c] + h2s[c] <=> 3 h[c] + 3 nadph[c] + slfi[c]	-0.013785	-0.021097	-0.013785	-0.0214058	-0.013785	-0.0214662	-0.013785	-0.0217735
r0615	rthio[c] + paps[c] -> h[c] + slfi[c] + othio[c] + pap[c]	0	0	0	0	0	0	0	0
r0616	2 h[c] + amp[c] + fad[m] + slfi[c] <=> fadh2[m] + aps[c]	-0.013785	-0.859934	-0.013785	-0.721653	-0.013785	-0.694595	-0.013785	-0.556981
r0617	atp[c] + slf[c] -> ppi[c] + aps[c]	0.013785	0.859934	0.013785	0.721653	0.013785	0.694595	0.013785	0.556981
r0618	h2o[c] + pap[c] -> amp[c] + pi[c]	1.17238e-13	6.27669e-14	-1.98207e-15	0	3.88972e-17	-4.1208e-16	0	-1.78671e-13
r0619	h2o[m] + pap[m] -> pi[m] + amp[m]	-1.17238e-13	-6.27669e-14	1.98207e-15	0	-3.88972e-17	4.1208e-16	0	1.78671e-13
r0620	h2o[c] + llct[c] -> nh3[c] + pyr[c] + hcys[c]	0.00865704	0.013249	0.00865704	0.0134429	0.00865704	0.0134809	0.00865704	0.0136738
ex_13glucan[e]	13glucan[e] <=>	0	0	0	0	0	0	0	0
ex_1dgali[e]	1dgali[e] <=>	0	0	0	0	0	0	0	0
ex_ac[e]	ac[e] <=>	0	0	0	0	0	0	0	0
ex_ad[e]	ad[e] <=>	0	0	0	0	0	0	0	0
ex_akg[e]	akg[e] <=>	0	0	0	0	0	0	0	0
ex_ala[e]	ala[e] <=>	0	0	0	0	0	0	0	0
ex_amp[e]	amp[e] <=>	0	0	0	0	0	0	0	0
ex_aol[e]	aol[e] <=>	0	0	0	0	0	0	0	0
ex_arab[e]	arab[e] <=>	0	0	0	0	0	0	0	0
ex_arabin[e]	arabin[e] <=>	0	0	0	0	0	0	0	0
ex_arg[e]	arg[e] <=>	0	0	0	0	0	0	0	0
ex_asn[e]	asn[e] <=>	0	0	0	0	0	0	0	0
ex_asp[e]	asp[e] <=>	0	0	0	0	0	0	0	0
ex_atp[c]	atp[c] <=>	0	0	0	0	0	0	0	0
ex_bamn[e]	bamn[e] <=>	0	0	0	0	0	0	0	0
ex_bdfru[e]	bdfru[e] <=>	0	0	0	0	0	0	0	0
ex_bgal[e]	bgal[e] <=>	0	0	0	0	0	0	0	0
ex_blaras[e]	blaras[e] <=>	0	0	0	0	0	0	0	0
ex_bn[e]	bn[e] <=>	0	0	0	0	0	0	0	0
ex_bt[e]	bt[e] <=>	0	0	0	0	0	0	0	0
ex_c120[e]	c120[e] <=>	0	0	0	0	0	0	0	0
ex_c140[e]	c140[e] <=>	0	0	0	0	0	0	0	0
ex_c160[e]	c160[e] <=>	0	0	0	0	0	0	0	0
ex_c161[e]	c161[e] <=>	0	0	0	0	0	0	0	0
ex_c180[e]	c180[e] <=>	0	0	0	0	0	0	0	0
ex_c181[e]	c181[e] <=>	0	0	0	0	0	0	0	0
ex_c182[e]	c182[e] <=>	0	0	0	0	0	0	0	0
ex_c183[e]	c183[e] <=>	0	0	0	0	0	0	0	0
ex_c60[e]	c60[e] <=>	0	0	0	0	0	0	0	0
ex_c80[e]	c80[e] <=>	0	0	0	0	0	0	0	0
ex_ca[e]	ca[e] <=>	0	0	0	0	0	0	0	0
ex_cellob[e]	cellob[e] <=>	0	0	0	0	0	0	0	0
ex_cellot[e]	cellot[e] <=>	0	0	0	0	0	0	0	0
ex_cellu[e]	cellu[e] <=>	0	0	0	0	0	0	0	0
ex_chit[e]	chit[e] <=>	0	0	0	0	0	0	0	0
ex_cit[e]	cit[e] <=>	0	0	0	0	0	0	0	0
ex_cln[e]	cln[e] <=>	0	0	0	0	0	0	0	0
ex_co2[e]	co2[e] <=>	1.67958	2.4746	1.67958	2.35995	1.67958	2.33752	1.67958	2.22342
ex_cyan[e]	cyan[e] <=>	0	0	0	0	0	0	0	0
ex_cys[e]	cys[e] <=>	0	0	0	0	0	0	0	0
ex_cyts[e]	cyts[e] <=>	0	0	0	0	0	0	0	0
ex_dfru[e]	dfru[e] <=>	0	0	0	0	0	0	0	0
ex_doris[e]	doris[e] <=>	0	0	0	0	0	0	0	0
ex_e4p[e]	e4p[e] ->	0	0	0	0	0	0	0	0
ex_epm[e]	epm[e] <=>	0	0	0	0	0	0	0	0
ex_eth[e]	eth[e] <=>	0	0	0	0	0	0	0	0
ex_fe[e]	fe[e] <=>	0	0	0	0	0	0	0	0
ex_for[e]	for[e] <=>	0	0	0	0	0	0	0	0
ex_fum[e]	fum[e] <=>	0	0	0	0	0	0	0	0
ex_g15l[e]	g15l[e] ->	0	0	0	0	0	0	0	0
ex_gaba[e]	gaba[e] <=>	0	0	0	0	0	0	0	0
ex_gal[e]	gal[e] <=>	0	0	0	0	0	0	0	0
ex_gali[e]	gali[e] <=>	0	0	0	0	0	0	0	0
ex_galnt[e]	galnt[e] <=>	0	0	0	0	0	0	0	0
ex_galunt[e]	galunt[e] <=>	0	0	0	0	0	0	0	0
ex_gdpman[e]	gdpman[e] <=>	0	0	0	0	0	0	0	0
ex_geod[c]	geod[c] ->	0	0	0	0	0	0	0	0
ex_ggl[e]	ggl[e] <=>	0	0	0	0	0	0	0	0
ex_gl[e]	gl[e] <=>	0	0	0	0	0	0	0	0
ex_glcnt[e]	glcnt[e] <=>	0	0	0	0	0	0	0	0
ex_gln[e]	gln[e] <=>	0	0	0	0	0	0	0	0
ex_glu[e]	glu[e] <=>	0	0	0	0	0	0	0	0
ex_gly[e]	gly[e] <=>	0	0	0	0	0	0	0	0
ex_glycogen[e]	glycogen[e] <=>	0	0	0	0	0	0	0	0
ex_gn[e]	gn[e] <=>	0	0	0	0	0	0	0	0
ex_gua[e]	gua[e] ->	0	0	0	0	0	0	0	0
ex_h[e]	h[e] <=>	-1.718	-1.718	0	0	-1.718	-1.718	-1.718	-1.718
ex_h2o[e]	h2o[e] <=>	4.52686	5.33577	4.52686	5.16242	4.52686	5.1285	4.52686	4.95599
ex_hisan[e]	hisan[e] <=>	0	0	0	0	0	0	0	0
ex_hno3[e]	hno3[e] <=>	0	0	0	0	0	0	0	0
ex_i5p[e]	i5p[e] <=>	0	0	0	0	0	0	0	0
ex_i5p2[e]	i5p2[e] <=>	0	0	0	0	0	0	0	0
ex_i6p[e]	i6p[e] <=>	0	0	0	0	0	0	0	0
ex_icit[e]	icit[e] <=>	0	0	0	0	0	0	0	0
ex_idol[e]	idol[e] <=>	0	0	0	0	0	0	0	0
ex_ile[e]	ile[e] <=>	0	0	0	0	0	0	0	0
ex_imlt[e]	imlt[e] <=>	0	0	0	0	0	0	0	0
ex_ins[e]	ins[e] ->	0	0	0	0	0	0	0	0
ex_k[e]	k[e] <=>	0	0	0	0	0	0	0	0
ex_lac[e]	lac[e] <=>	0	0	0	0	0	0	0	0
ex_lact[e]	lact[e] <=>	0	0	0	0	0	0	0	0
ex_larab[e]	larab[e] <=>	0	0	0	0	0	0	0	0
ex_leu[e]	leu[e] <=>	0	0	0	0	0	0	0	0
ex_llac[e]	llac[e] <=>	0	0	0	0	0	0	0	0
ex_lovst[e]	lovst[c] ->	0	3.08419e-14	1.03443e-13	2.94e-14	-2.99064e-15	3.1963e-14	0	0
ex_lxul[e]	lxul[e] <=>	0	0	0	0	0	0	0	0
ex_lys[e]	lys[e] <=>	0	0	0	0	0	0	0	0
ex_mal[e]	mal[e] <=>	0	0	0	0	0	0	0	0
ex_man[e]	man[e] <=>	0	0	0	0	0	0	0	0
ex_mannan[e]	mannan[e] <=>	0	0	0	0	0	0	0	0
ex_meli[e]	meli[e] <=>	0	0	0	0	0	0	0	0
ex_melt[e]	melt[e] <=>	0	0	0	0	0	0	0	0
ex_met[e]	met[e] <=>	0	0	0	0	0	0	0	0
ex_meth[e]	meth[e] <=>	0	0	0	0	0	0	0	0
ex_mlt[e]	mlt[e] <=>	0	0	0	0	0	0	0	0
ex_mnt[e]	mnt[e] <=>	0	0	0	0	0	0	0	0
ex_msali[e]	msali[e] <=>	0	0	0	0	0	0	0	0
ex_na[e]	na[e] <=>	0	0	0	0	0	0	0	0
ex_nh3[e]	nh3[e] <=>	-0.682103	-1.04391	-0.682103	-1.05919	-0.682103	-1.06218	-0.682103	-1.07739
ex_o2[e]	o2[e] <=>	-1.38252	-1.80896	-1.38252	-1.63428	-1.38252	-1.6001	-1.38252	-1.42627
ex_ota[e]	ota[e] ->	0	0	0	0	0	0	0	0
ex_oxal[e]	oxal[e] <=>	0	0	0	0	0	0	0	0
ex_phe[e]	phe[e] <=>	0	0	0	0	0	0	0	0
ex_pi[e]	pi[e] <=>	-0.0808545	-0.123742	-0.0808545	-0.125553	-0.0808545	-0.125908	-0.0808545	-0.12771
ex_pnto[e]	pnto[e] <=>	0	0	0	0	0	0	0	0
ex_pro[e]	pro[e] <=>	0	0	0	0	0	0	0	0
ex_ptate[e]	ptate[e] <=>	0	0	0	0	0	0	0	0
ex_pyr[e]	pyr[e] <=>	0	0	0	0	0	0	0	0
ex_qt[e]	qt[e] <=>	0	0	0	0	0	0	0	0
ex_r5p[e]	r5p[e] ->	0	0	0	0	0	0	0	0
ex_raff[e]	raff[e] <=>	0	0	0	0	0	0	0	0
ex_rib[e]	rib[e] <=>	0	0	0	0	0	0	0	0
ex_rl[e]	rl[e] <=>	0	0	0	0	0	0	0	0
ex_sali[e]	sali[e] <=>	0	0	0	0	0	0	0	0
ex_ser[e]	ser[e] <=>	0	0	0	0	0	0	0	0
ex_sihm[e]	sihm[e] ->	0	0	0	0	0	0	0	0
ex_slf[e]	slf[e] <=>	-0.013785	-0.021097	-0.013785	-0.0214058	-0.013785	-0.0214662	-0.013785	-0.0217735
ex_slfi[e]	slfi[e] ->	0	1.11022e-16	0	1.11022e-16	3.46945e-18	0	-1.73472e-18	1.11022e-16
ex_sor[e]	sor[e] <=>	0	0	0	0	0	0	0	0
ex_sot[e]	sot[e] <=>	0	0	0	0	0	0	0	0
ex_stac[e]	stac[e] <=>	0	0	0	0	0	0	0	0
ex_star[e]	star[e] <=>	0	0	0	0	0	0	0	0
ex_suc[e]	suc[e] <=>	0	0	0	0	0	0	0	0
ex_succ[e]	succ[e] <=>	0	0	0	0	0	0	0	0
ex_thr[e]	thr[e] <=>	0	0	0	0	0	0	0	0
ex_trp[e]	trp[e] <=>	0	0	0	0	0	0	0	0
ex_tyr[e]	tyr[e] <=>	0	0	0	0	0	0	0	0
ex_ura[e]	ura[e] <=>	0	0	0	0	0	0	0	0
ex_urate[e]	urate[e] <=>	0	0	0	0	0	0	0	0
ex_urea[e]	urea[e] <=>	0	0	0	0	0	0	0	0
ex_uri[e]	uri[e] <=>	0	0	0	0	0	0	0	0
ex_val[e]	val[e] <=>	0	0	0	0	0	0	0	0
ex_vb2[e]	vb2[e] ->	0	0	0	0	0	0	0	0
ex_ve[e]	ve[e] <=>	0	0	0	0	0	0	0	0
ex_xol[e]	xol[e] <=>	0	0	0	0	0	0	0	0
ex_xul[e]	xul[e] <=>	0	0	0	0	0	0	0	0
ex_xyl[e]	xyl[e] <=>	0	0	0	0	0	0	0	0
ex_xylan[e]	xylan[e] <=>	0	0	0	0	0	0	0	0
r0621	h[m] + fad[m] + c180coa[m] -> fadh2[m] + c18dcoa[m]	0	0	0	0	0	0	0	0
r0622	h[m] + fad[m] + c160coa[m] -> fadh2[m] + c16dcoa[m]	0	0	0	0	0	0	0	0
r0623	h[m] + fad[m] + c140coa[m] -> fadh2[m] + c14dcoa[m]	0	0	0	0	0	0	0	0
r0624	h[m] + fad[m] + c120coa[m] -> fadh2[m] + c12dcoa[m]	0	0	0	0	0	0	0	0
r0625	h[m] + fad[m] + c100coa[m] -> fadh2[m] + c10dcoa[m]	0.013785	0	0	0	0	0	0	0
r0626	h[m] + fad[m] + c80coa[m] -> fadh2[m] + c8dcoa[m]	0	0	0.013785	0	0	0	0	0
r0627	h2o[m] + atp[m] + pe[m] -> h[m] + pi[m] + adp[m] + pe[c]	0	0	0	0	0	0	0	0
r0628	h2o[m] + atp[m] + ps[m] -> h[c] + pi[m] + adp[m] + ps[c]	0	0	0	0	0	0	0	0
r0629	h2o[m] + atp[m] + pg[m] -> h[c] + pi[m] + adp[m] + pg[c]	0	0	0	0	0	0	0	0
r0630	h2o[m] + atp[m] + pa[m] -> h[m] + pi[m] + adp[m] + pa[c]	0	0	0	0	0	0	0	0
r0631	lpc[c] + acylcoa[c] -> 2 h[c] + coa[c] + pc[c]	0	0	0	0	0	0	0	0
r0632	lpe[c] + acylcoa[c] -> coa[c] + pe[c]	0	0	0	0	0	0	0	0
r0633	nh4oh[c] + pa[c] -> h2o[c] + paa[c]	0.0035213	0.0053891	0.0035213	0.00546798	0.0035213	0.00548341	0.0035213	0.0055619
r0634	dagly[c] + acylcoa[c] -> coa[c] + tagly[c]	0	0	0	0	0	0	0	0
r0635	2 h[c] + dagly[c] + pc[c] -> lpc[c] + tagly[c]	0	0	0	0	0	0	0	0
r0636	dagly[c] + pe[c] -> tagly[c] + lpe[c]	0	0	0	0	0	0	0	0
r0637	dagly[c] + paa[c] -> tagly[c] + lpaa[c]	0	0	0	0	0	0	0	0
r0638	dagly[c] + ps[c] -> tagly[c] + lps[c]	0	0	0	0	0	0	0	0
r0639	dagly[c] + pdme[c] -> tagly[c] + lpdme[c]	0	0	0	0	0	0	0	0
r0640	dagly[c] + pmme[c] -> tagly[c] + lpmme[c]	0	0	0	0	0	0	0	0
r0641	dagly[c] + pg[c] -> tagly[c] + lpg[c]	0	0	0	0	0	0	0	0
r0642	h2o[c] + tagly[c] + acp[c] -> dagly[c] + acylacp[c]	0	0	0	0	0	0	0	0
r0643	h2o[c] + dagly[c] + acp[c] -> acylacp[c] + magly[c]	0	0	0	0	0	0	0	0
r0644	h2o[c] + magly[c] -> gl[c] + ffa[c]	0.004904	0.00750523	0.004904	0.00761507	0.004904	0.00763657	0.004904	0.00774588
r0645	atp[c] + magly[c] -> h[c] + adp[c] + agl3p[c]	0.00468936	0.00717674	0.00468936	0.00728178	0.00468936	0.00730233	0.00468936	0.00740686
r0646	h[c] + nadh[c] + t3p2[c] -> nad[c] + gl3p[c]	0	0.057909	0	0	0	0	0	0
r0647	h[m] + fad[m] + gl3p[m] -> fadh2[m] + t3p2[m]	0	0	0	0	0	0	0	0
r0648	2 h[c] + dagly[c] + pc[c] -> lpc[c] + tagly[c]	0	0	0	0	0	0	0	0
r0649	dagly[c] + 0.354 c182acp[c] + 0.032 c183acp[c] + 0.026 c180acp[c] + 0.374 c181acp[c] + 0.024 c120acp[c] + 0.154 c160acp[c] + 0.02 c161acp[c] + 0.013 c140acp[c] + 0.012 c141acp[c] -> tagly[c] + acp[c]	0.322268	0.493209	0.322268	0.500428	0.322268	0.50184	0.322268	0.509024
r0650	atp[c] + gl[c] -> h[c] + adp[c] + gl3p[c]	0	0	0.0378384	0.0587566	0	0	0.0378384	0.0597659
r0651	h2o[c] + tagly[c] -> dagly[c] + 0.026 c180[c] + 0.374 c181[c] + 0.354 c182[c] + 0.032 c183[c] + 0.024 c120[c] + 0.154 c160[c] + 0.02 c161[c] + 0.013 c140[c] + 0.012 c141[c]	0.312675	0.478527	0.312675	0.485531	0.312675	0.486901	0.312675	0.493871
r0652	h2o[c] + dagly[c] -> magly[c] + 0.026 c180[c] + 0.374 c181[c] + 0.354 c182[c] + 0.032 c183[c] + 0.024 c120[c] + 0.154 c160[c] + 0.02 c161[c] + 0.013 c140[c] + 0.012 c141[c]	0	0	0	0	0	0	0	0
r0653	h2o[c] + gl3p[c] -> pi[c] + gl[c]	0	0	0	0	0	0	0	0
r0654	h2o[e] + pc[e] -> h[e] + pcln[e] + dagly[e]	0	0	0	0	0	0	0	0
r0655	h2o[e] + pe[e] -> h[e] + dagly[e] + pea[e]	0	0	0	0	0	0	0	0
r0656	nad[c] + gl[c] -> h[c] + nadh[c] + glyn[c]	997.165	0	997.127	997.438	0	0	0	0
r0657	h[c] + nadph[c] + glyal[c] -> nadp[c] + gl[c]	997.171	0.0105854	997.171	997.507	0.00691661	0.0107706	0.044755	0.0706907
r0658	gl3p[c] + acylacpp[c] -> acp[c] + agl3p[c]	0	0.057909	0.0378384	0.0587566	1.40576e-28	5.63171e-28	0.0378384	0.0597659
r0659	t3p2[c] + acylacpp[c] -> acp[c] + at3p2[c]	0.0378384	0	0	0	0.0378384	0.0589224	0	0
r0660	t3p2[c] + 0.40469 c182acp[c] + 0.211 c183acp[c] + 0.00313 c180acp[c] + 0.14598 c181acp[c] + 0.00079 c120acp[c] + 0.00093 c160acp[c] + 0.21661 c161acp[c] + 0.01686 c140acp[c] -> acp[c] + at3p2[c]	6.61545e-18	0	9.91878e-18	0	4.22421e-18	2.07057e-18	0	0
r0661	0.40469 c182acp[c] + 0.211 c183acp[c] + 0.00313 c180acp[c] + 0.14598 c181acp[c] + 0.00079 c120acp[c] + 0.00093 c160acp[c] + 0.21661 c161acp[c] + 0.01686 c140acp[c] + gl3p[c] -> acp[c] + agl3p[c]	1.96228e-23	-4.40918e-18	0	-3.54406e-18	0	0	-9.51093e-18	-1.04756e-17
r0662	dagly[c] + cdpcln[c] -> h[c] + cmp[c] + pc[c]	0	0	0	0	0	0	0	0
r0663	h2o[e] + accln[e] -> h[e] + cln[e] + ac[e]	0	0	0	0	0	0	0	0
r0664	ps[m] -> co2[m] + pe[m]	0	0	0	0	0	0	0	0
r0665	2 sam[c] + pcpmme[c] -> 2 h[c] + 2 sah[c] + pc[c]	0.0123899	0.0189618	0.0123899	0.0192394	0.0123899	0.0192937	0.0123899	0.0195698
r0666	sam[c] + pe[c] -> h[c] + sah[c] + pcpmme[c]	0.0123899	0.0189618	0.0123899	0.0192394	0.0123899	0.0192937	0.0123899	0.0195698
r0667	atp[c] + cln[c] -> h[c] + adp[c] + pcln[c]	0	0	0	0	0	0	0	0
r0668	h2o[m] + h[m] + pgp[m] -> pi[m] + pg[m]	0	0	0	0	0	0	0	0
r0669	2 h[c] + acylcoa[c] + mlcl[c] -> coa[c] + cl[c]	0	0	0	0	0	0	0	0
r0670	h2o[m] + cl[m] -> mlcl[m] + ffa[m]	0	0	0	0	0	0	0	0
r0671	h2o[m] + glypcln[m] -> h[m] + gl3p[m] + cln[m]	0	0	0	0	0	0	0	0
r0672	h2o[e] + glypcln[e] -> h[e] + cln[e] + gl3p[e]	0	0	0	0	0	0	0	0
r0673	h2o[c] + glypeln[c] -> h[c] + gl3p[c] + ethla[c]	0	0	0	0	0	0	0	0
r0674	atp[c] + ethla[c] -> h[c] + adp[c] + pea[c]	0	0	0	0	0	0	0	0
r0675	ser[c] + pc[c] -> ps[c] + cl[c]	0	0	0	0	0	0	0	0
r0676	cdpdg[c] + pg[c] -> 2 h[c] + cmp[c] + cl[c]	0	0	0	0	0	0	0	0
r0677	h[c] + nadph[c] + at3p2[c] -> nadp[c] + agl3p[c]	0.0378384	0	9.91878e-18	0	0.0378384	0.0589224	0	0
r0678	t3p2[c] + acylcoa[c] -> coa[c] + at3p2[c]	0	0	0	0	0	0	0	0
r0679	agl3p[c] + acylacpp[c] -> acp[c] + pa[c]	0.0425277	0.0650858	0.0425277	0.0660384	0.0425277	0.0662248	0.0425277	0.0671728
r0680	2 h[c] + acylcoa[c] + agl3p[c] -> coa[c] + pa[c]	0	0	0	0	0	0	0	0
r0681	atp[c] + h[c] + pins[c] -> adp[c] + pins4p[c]	0	0	0	0	0	0	0	0
r0682	atp[c] + h[c] + pins4p[c] -> adp[c] + d45pi[c]	0	0	0	0	0	0	0	0
r0683	pea[c] + ctp[c] -> ppi[c] + cdpea[c]	0	0	0	0	0	0	0	0
r0684	ctp[m] + pcln[m] -> ppi[m] + cdpcln[m]	0	0	0	0	0	0	0	0
r0685	pa[c] + ctp[c] <=> ppi[c] + cdpdg[c]	0.0198197	0.0303327	0.0198197	0.0307767	0.0198197	0.0308636	0.0198197	0.0313054
r0686	dagly[c] + cdpea[c] -> h[c] + cmp[c] + pe[c]	0	0	0	0	0	0	0	0
r0687	ser[c] + cdpdg[c] <=> 2 h[c] + cmp[c] + ps[c]	0.0198197	0.0303327	0.0198197	0.0307767	0.0198197	0.0308636	0.0198197	0.0313054
r0688	h2o[c] + h[c] + pc[c] -> lpc[c] + carbo[c]	0	0	0	0	0	0	0	0
r0689	h2o[c] + lpc[c] -> 3 h[c] + carbo[c] + glypcln[c]	0	0	0	0	0	0	0	0
r0690	h2o[c] + lpe[c] -> h[c] + carbo[c] + glypeln[c]	0	0	0	0	0	0	0	0
r0691	h2o[c] + pa[c] -> 2 h[c] + pi[c] + dagly[c]	0.0191867	0.0293639	0.0191867	0.0297937	0.0191867	0.0298778	0.0191867	0.0303055
r0692	h2o[c] + d45pi[c] -> 6 h[c] + tpi[c] + dagly[c]	0	0	0	0	0	0	0	0
r0693	h2o[c] + h[c] + pc[c] -> cln[c] + pa[c]	0	0	0	0	0	0	0	0
r0694	h2o[c] + h[c] + pe[c] -> pa[c] + ethla[c]	0	0	0	0	0	0	0	0
r0695	ps[c] -> co2[c] + pe[c]	0.0176765	0.0270526	0.0176765	0.0274486	0.0176765	0.027526	0.0176765	0.0279201
r0696	gl3p[m] + cdpdg[m] -> 3 h[m] + pgp[m] + cmp[m]	0	0	0	0	0	0	0	0
r0697	pc[c] + acp[c] -> lpc[c] + acylacpp[c]	0	0	0	0	0	0	0	0
r0698	pe[c] + acp[c] -> lpe[c] + acylacpp[c]	0	0	0	0	0	0	0	0
r0699	acylcoa[c] + sph[c] -> h[c] + coa[c] + dcer2[c]	0	0	0	0	0	0	0	0
r0700	atp[c] + sphe[c] -> h[c] + adp[c] + sphep[c]	0	0	0	0	0	0	0	0
r0701	h2o[c] + sphep[c] -> pi[c] + sphe[c]	0	0	0	0	0	0	0	0
r0702	sphep[c] -> pea[c] + c16e[c]	0	0	0	0	0	0	0	0
r0703	h2o[e] + pcer2[e] -> psph[e]	0	0	0	0	0	0	0	0
r0704	h2o[e] + cer1[e] -> sphe[e]	0	0	0	0	0	0	0	0
r0705	o2[c] + h[c] + nadph[c] + dcer2[c] -> h2o[c] + nadp[c] + pcer2[c]	0	0	0	0	0	0	0	0
r0706	o2[c] + h[c] + nadph[c] + sph[c] -> h2o[c] + nadp[c] + psph[c]	0	0	0	0	0	0	0	0
r0707	dcer2[c] -> 2 h[c] + cer1[c]	0	0	0	0	0	0	0	0
r0708	h[c] + nadph[c] + dhsph[c] -> nadp[c] + sph[c]	0	0	0	0	0	0	0	0
r0709	h[c] + ser[c] + c160coa[c] -> co2[c] + coa[c] + dhsph[c]	0	0	0	0	0	0	0	0
r0710	pins[c] + mipc[c] -> h2o[c] + mip2c[c]	0	0	0	0	0	0	0	0
r0711	atp[c] + sph[c] -> h[c] + adp[c] + dhsp[c]	0	0	0	0	0	0	0	0
r0712	atp[c] + psph[c] -> h[c] + adp[c] + phsp[c]	0	0	0	0	0	0	0	0
r0713	h2o[c] + dhsp[c] -> pi[c] + sph[c]	0	0	0	0	0	0	0	0
r0714	h2o[e] + spmylin[e] -> 2 h[e] + pcln[e] + cer1[e]	0	0	0	0	0	0	0	0
r0715	h2o[c] + suft[c] -> 2 h[c] + slf[c] + galcer[c]	0	0	0	0	0	0	0	0
r0716	dhsp[c] -> pea[c] + c16a[c]	0	0	0	0	0	0	0	0
r0717	2 h[c] + phsp[c] -> h2o[c] + pea[c] + c16a[c]	0	0	0	0	0	0	0	0
r0718	c180coa[c] + psph[c] -> coa[c] + cerb1a[c]	0	0	0	0	0	0	0	0
r0719	c181coa[c] + psph[c] -> coa[c] + cerb1b[c]	0	0	0	0	0	0	0	0
r0720	c180coa[c] + sph[c] -> coa[c] + cerb2a[c]	0	0	0	0	0	0	0	0
r0721	c180coa[c] + psph[c] -> coa[c] + cerb1c[c]	0	0	0	0	0	0	0	0
r0722	c181coa[c] + sph[c] -> coa[c] + cerb2b[c]	0	0	0	0	0	0	0	0
r0723	c181coa[c] + psph[c] -> coa[c] + cerb1d[c]	0	0	0	0	0	0	0	0
r0724	c180coa[c] + sph[c] -> coa[c] + cerb2c[c]	0	0	0	0	0	0	0	0
r0725	c181coa[c] + sph[c] -> coa[c] + cerb2d[c]	0	0	0	0	0	0	0	0
r0726	c180coa[c] + sph[c] -> coa[c] + cereb1[c]	0	0	0	0	0	0	0	0
r0727	udpg[c] + cereb1[c] -> udp[c] + glucer1[c]	0	0	0	0	0	0	0	0
r0728	c181coa[c] + sph[c] -> coa[c] + cereb2[c]	0	0	0	0	0	0	0	0
r0729	udpg[c] + cereb2[c] -> udp[c] + glucer2[c]	0	0	0	0	0	0	0	0
r0730	0.22419 c182acp[c] + 0.07492 c183acp[c] + 0.0837 c180acp[c] + 0.2352 c181acp[c] + 0.15047 c120acp[c] + 0.19543 c160acp[c] -> acylacpp[c]	0.0803661	0.122995	0.0803661	0.124795	0.0803661	0.125147	0.0803661	0.126939
r0731	0.6673 c182acp[c] + 0.0404 c183acp[c] + 0.0304 c180acp[c] + 0.1534 c181acp[c] + 0.272 c160acp[c] + 0.0051 c161acp[c] -> acylacp[c]	0	0	0	0	0	0	0	0
r0732	ala[c] + gsh[c] -> alagly[c] + cgly[c]	0	0	0	0	0	0	0	0
r0733	o2[c] + h[c] + nadh[c] + c182acp[c] -> 2 h2o[c] + nad[c] + c183acp[c]	0.00602103	0.00921477	0.00602103	0.00934964	0.00602103	0.00937603	0.00602103	0.00951024
r0734	accoa[c] + cbccp[c] <=> malcoa[c] + bccp[c]	0	0	0	0	0	0	0	0
r0735	c14hacp[c] <=> h2o[c] + c14dacp[c]	0.065373	0.100049	0.065373	0.101513	0.065373	0.1018	0.065373	0.103257
r0736	h[c] + nadph[c] + c16oacp[c] <=> nadp[c] + c16hacp[c]	0.065373	0.100049	0.065373	0.101513	0.065373	0.1018	0.065373	0.103257
r0737	c16hacp[c] <=> h2o[c] + c16dacp[c]	0.065373	0.100049	0.065373	0.101513	0.065373	0.1018	0.065373	0.103257
r0738	c18hacp[c] <=> h2o[c] + c18dacp[c]	0.0496671	0.076012	0.0496671	0.0771245	0.0496671	0.0773422	0.0496671	0.0784494
r0739	2 h[c] + 2 nadph[c] + c40acp[c] + malacp[c] -> h2o[c] + co2[c] + 2 nadp[c] + acp[c] + c60acp[c]	0	0	0	0	0	0	0	0
r0740	h2o[c] + c40acp[c] -> h[c] + acp[c] + c40[c]	0	0	0	0	0	0	0	0
r0741	h2o[c] + c60acp[c] -> h[c] + acp[c] + c60[c]	0	0	0	0	0	0	0	0
r0742	h2o[c] + c80acp[c] -> h[c] + acp[c] + c80[c]	0	0	0	0	0	0	0	0
r0743	h2o[c] + c100acp[c] -> h[c] + acp[c] + c100[c]	0	0	0	0	0	0	0	0
r0744	h2o[c] + c180acp[c] -> h[c] + acp[c] + c180[c]	0	0	0	0	0	0	0	0
r0745	h2o[c] + c181acp[c] -> h[c] + acp[c] + c181[c]	0	0	0	0	0	0	0	0
r0746	h2o[c] + c182acp[c] -> h[c] + acp[c] + c182[c]	0	0	0	0	0	0	0	0
r0747	h2o[c] + c183acp[c] -> h[c] + acp[c] + c183[c]	0	0	0	0	0	0	0	0
r0748	h2o[c] + c120acp[c] -> h[c] + acp[c] + c120[c]	0	0	0	0	0	0	0	0
r0749	2 h[c] + 2 nadph[c] + malacp[c] + acacp[c] -> h2o[c] + co2[c] + 2 nadp[c] + acp[c] + c40acp[c]	0	0	0	0	0	0	0	0
r0750	h2o[c] + c140acp[c] -> h[c] + acp[c] + c140[c]	0	0	0	0	0	0	0	0
r0751	h2o[c] + c160acp[c] -> h[c] + acp[c] + c160[c]	0	0	0	0	0	0	0	0
r0752	h2o[c] + c161acp[c] -> h[c] + acp[c] + c161[c]	0	0	0	0	0	0	0	0
r0753	h2o[c] + c162acp[c] -> h[c] + acp[c] + c162[c]	0	0	0	0	0	0	0	0
r0754	h[c] + nadph[c] + c8oacp[c] <=> nadp[c] + c8hacp[c]	0.0774657	0.118556	0.0774657	0.120291	0.0774657	0.120631	0.0774657	0.122357
r0755	h2o[c] + atp[c] + co2[c] + bccp[c] -> 2 h[c] + pi[c] + adp[c] + cbccp[c]	0	0	0	0	0	0	0	0
r0756	h[c] + nadph[c] + c10oacp[c] <=> nadp[c] + c10hacp[c]	0.0774657	0.118556	0.0774657	0.120291	0.0774657	0.120631	0.0774657	0.122357
r0757	h[c] + nadph[c] + c12oacp[c] <=> nadp[c] + c12hacp[c]	0.0774657	0.118556	0.0774657	0.120291	0.0774657	0.120631	0.0774657	0.122357
r0758	h[c] + nadph[c] + c14oacp[c] <=> nadp[c] + c14hacp[c]	0.065373	0.100049	0.065373	0.101513	0.065373	0.1018	0.065373	0.103257
r0759	h[c] + nadph[c] + c18oacp[c] <=> nadp[c] + c18hacp[c]	0.0496671	0.076012	0.0496671	0.0771245	0.0496671	0.0773422	0.0496671	0.0784494
r0760	nadp[c] + c40acp[c] <=> h[c] + nadph[c] + c4dacp[c]	-0.0774657	0	-0.0774657	0	-0.0774657	-2.95729e-28	-0.0774657	0
r0761	nadp[c] + c60acp[c] <=> h[c] + nadph[c] + c6dacp[c]	-0.0774657	-0.118556	-0.0774657	-0.120291	-0.0774657	-0.120631	-0.0774657	-0.122357
r0762	nadp[c] + c80acp[c] <=> h[c] + nadph[c] + c8dacp[c]	-0.0774657	-0.118556	-0.0774657	-0.120291	-0.0774657	-0.120631	-0.0774657	-0.122357
r0763	nadp[c] + c100acp[c] <=> h[c] + nadph[c] + c10dacp[c]	-0.0774657	-0.118556	-0.0774657	-0.120291	-0.0774657	-0.120631	-0.0774657	-0.122357
r0764	nadp[c] + c120acp[c] <=> h[c] + nadph[c] + c12dacp[c]	-0.0774657	-0.118556	-0.0774657	-0.120291	-0.0774657	-0.120631	-0.0774657	-0.122357
r0765	h[c] + nadph[c] + c14dacp[c] <=> nadp[c] + c140acp[c]	0.065373	0.100049	0.065373	0.101513	0.065373	0.1018	0.065373	0.103257
r0766	nadp[c] + c160acp[c] <=> h[c] + nadph[c] + c16dacp[c]	-0.065373	-0.100049	-0.065373	-0.101513	-0.065373	-0.1018	-0.065373	-0.103257
r0767	nadp[c] + c180acp[c] <=> h[c] + nadph[c] + c18dacp[c]	-0.0496671	-0.076012	-0.0496671	-0.0771245	-0.0496671	-0.0773422	-0.0496671	-0.0784494
r0768	h[c] + nadph[c] + aacacp[c] <=> nadp[c] + c4hacp[c]	0.0774657	0	0.0774657	0	0.0774657	2.95729e-28	0.0774657	0
r0769	h[c] + malcoa[c] + acp[c] <=> coa[c] + malacp[c]	0.567742	0.750334	0.567742	0.761315	0.567742	0.763464	0.567742	0.774393
r0770	malacp[c] + acacp[c] -> co2[c] + acp[c] + aacacp[c]	0.0774657	0	0.0774657	0	0.0774657	2.95774e-28	0.0774657	0
r0771	c40acp[c] + malacp[c] -> co2[c] + acp[c] + c6oacp[c]	0.0774657	0.118556	0.0774657	0.120291	0.0774657	0.120631	0.0774657	0.122357
r0772	malacp[c] + c60acp[c] -> co2[c] + acp[c] + c8oacp[c]	0.0774657	0.118556	0.0774657	0.120291	0.0774657	0.120631	0.0774657	0.122357
r0773	malacp[c] + c80acp[c] -> co2[c] + acp[c] + c10oacp[c]	0.0774657	0.118556	0.0774657	0.120291	0.0774657	0.120631	0.0774657	0.122357
r0774	malacp[c] + c100acp[c] -> co2[c] + acp[c] + c12oacp[c]	0.0774657	0.118556	0.0774657	0.120291	0.0774657	0.120631	0.0774657	0.122357
r0775	malacp[c] + c120acp[c] -> co2[c] + acp[c] + c14oacp[c]	0.065373	0.100049	0.065373	0.101513	0.065373	0.1018	0.065373	0.103257
r0776	malacp[c] + c140acp[c] -> co2[c] + acp[c] + c16oacp[c]	0.065373	0.100049	0.065373	0.101513	0.065373	0.1018	0.065373	0.103257
r0777	malacp[c] + c160acp[c] -> co2[c] + acp[c] + c18oacp[c]	0.0496671	0.076012	0.0496671	0.0771245	0.0496671	0.0773422	0.0496671	0.0784494
r0778	2 h[c] + 2 nadph[c] + malacp[c] + c120acp[c] -> h2o[c] + co2[c] + 2 nadp[c] + acp[c] + c140acp[c]	0	0	0	0	0	0	0	0
r0779	2 h[c] + 2 nadph[c] + malacp[c] + c140acp[c] -> h2o[c] + co2[c] + 2 nadp[c] + acp[c] + c160acp[c]	0	0	0	0	0	0	0	0
r0780	2 h[c] + 2 nadph[c] + malacp[c] + c160acp[c] -> h2o[c] + co2[c] + 2 nadp[c] + acp[c] + c180acp[c]	0	0	0	0	0	0	0	0
r0781	c4hacp[c] <=> h2o[c] + c4dacp[c]	0.0774657	0	0.0774657	0	0.0774657	2.95735e-28	0.0774657	0
r0782	c6hacp[c] <=> h2o[c] + c6dacp[c]	0.0774657	0.118556	0.0774657	0.120291	0.0774657	0.120631	0.0774657	0.122357
r0783	c8hacp[c] <=> h2o[c] + c8dacp[c]	0.0774657	0.118556	0.0774657	0.120291	0.0774657	0.120631	0.0774657	0.122357
r0784	c10hacp[c] <=> h2o[c] + c10dacp[c]	0.0774657	0.118556	0.0774657	0.120291	0.0774657	0.120631	0.0774657	0.122357
r0785	c12hacp[c] <=> h2o[c] + c12dacp[c]	0.0774657	0.118556	0.0774657	0.120291	0.0774657	0.120631	0.0774657	0.122357
r0786	h[c] + nadph[c] + c6oacp[c] <=> nadp[c] + c6hacp[c]	0.0774657	0.118556	0.0774657	0.120291	0.0774657	0.120631	0.0774657	0.122357
r0787	2 h[c] + 2 nadph[c] + malacp[c] + c80acp[c] -> h2o[c] + co2[c] + 2 nadp[c] + acp[c] + c100acp[c]	0	0	0	0	0	0	0	0
r0788	2 h[c] + 2 nadph[c] + malacp[c] + c100acp[c] -> h2o[c] + co2[c] + 2 nadp[c] + acp[c] + c120acp[c]	0	0	0	0	0	0	0	0
r0789	2 h[c] + 2 nadph[c] + malacp[c] + c60acp[c] -> h2o[c] + co2[c] + 2 nadp[c] + acp[c] + c80acp[c]	0	0	0	0	0	0	0	0
r0790	ppacoa[c] + acp[c] <=> coa[c] + ppiacp[c]	0	0	0	0	0	0	0	0
r0791	o2[c] + h[c] + nadph[c] + c180acp[c] -> 2 h2o[c] + nadp[c] + c181acp[c]	0.0429404	0.0657174	0.0429404	0.0666792	0.0429404	0.0668674	0.0429404	0.0678246
r0792	o2[c] + h[c] + nadph[c] + c160acp[c] -> 2 h2o[c] + nadp[c] + c161acp[c]	0	0	0	0	0	0	0	0
r0793	o2[c] + h[c] + nadph[c] + c140acp[c] -> 2 h2o[c] + nadp[c] + c141acp[c]	0	0	0	0	0	0	0	0
r0794	o2[c] + h[c] + nadph[c] + c181acp[c] -> 2 h2o[c] + nadp[c] + c182acp[c]	0.0240383	0.036789	0.0240383	0.0373274	0.0240383	0.0374328	0.0240383	0.0379686
r0795	o2[c] + h[c] + nadph[c] + c161acp[c] <=> 2 h2o[c] + nadp[c] + c162acp[c]	0	0	0	0	0	0	0	0
r0796	acp[c] + c40coa[c] <=> coa[c] + c40acp[c]	3.96769e-26	0.118556	3.34749e-26	0.120291	0	0.120631	0	0.122357
r0797	acp[c] + c60coa[c] <=> coa[c] + c60acp[c]	0	0	0	0	0	0	0	0
r0798	acp[c] + c80coa[c] <=> coa[c] + c80acp[c]	0	0	0	0	0	0	0	0
r0799	acp[c] + c100coa[c] <=> coa[c] + c100acp[c]	1.82332e-18	0	0	0	0	0	0	0
r0800	acp[c] + c120coa[c] <=> coa[c] + c120acp[c]	0.00773443	0.011837	0.00773443	0.0120103	0.00773443	0.0120442	0.00773443	0.0122166
r0801	acp[c] + c140coa[c] <=> coa[c] + c140acp[c]	0.00418949	0.00641172	0.00418949	0.00650556	0.00418949	0.00652392	0.00418949	0.00661731
r0802	acp[c] + c141coa[c] <=> coa[c] + c141acp[c]	0.00386722	0.00591851	0.00386722	0.00600513	0.00386722	0.00602208	0.00386722	0.00610829
r0803	acp[c] + c160coa[c] <=> coa[c] + c160acp[c]	0.0496293	0.0759542	0.0496293	0.0770659	0.0496293	0.0772834	0.0496293	0.0783897
r0804	acp[c] + c161coa[c] <=> coa[c] + c161acp[c]	0.00644536	0.00986418	0.00644536	0.0100086	0.00644536	0.0100368	0.00644536	0.0101805
r0805	acp[c] + c162coa[c] <=> coa[c] + c162acp[c]	0	0	0	0	0	0	0	0
r0806	acp[c] + c180coa[c] <=> coa[c] + c180acp[c]	0.00837897	0.0128234	0.00837897	0.0130111	0.00837897	0.0130478	0.00837897	0.0132346
r0807	acp[c] + c181coa[c] <=> coa[c] + c181acp[c]	0.120528	0.18446	0.120528	0.18716	0.120528	0.187688	0.120528	0.190375
r0808	acp[c] + c182coa[c] <=> coa[c] + c182acp[c]	0.114083	0.174596	0.114083	0.177151	0.114083	0.177651	0.114083	0.180195
r0809	acp[c] + c183coa[c] <=> coa[c] + c183acp[c]	0.0103126	0.0157827	0.0103126	0.0160137	0.0103126	0.0160589	0.0103126	0.0162888
r0810	accoa[c] + acp[c] -> coa[c] + acacp[c]	0.0774657	0	0.0774657	0	0.0774657	0	0.0774657	0
r0811	h[m] + nadph[m] + acyldcoa[m] -> nadp[m] + acylcoa[m]	0	0	0	0	0	0	0	0
r0812	h[m] + nadph[m] + c16dcoa[m] -> nadp[m] + c160coa[m]	0	0	0	0	0	0	0	0
r0813	h[m] + nadph[m] + c8dcoa[m] -> nadp[m] + c80coa[m]	0	0	0.013785	0	0	0	0	0
r0814	h[m] + nadph[m] + c12dcoa[m] -> nadp[m] + c120coa[m]	0	0	0	0	0	0	0	0
r0815	h[m] + nadph[m] + c14dcoa[m] -> nadp[m] + c140coa[m]	0	0	0	0	0	0	0	0
r0816	h[m] + nadph[m] + c10dcoa[m] -> nadp[m] + c100coa[m]	0.013785	0	0	0	0	0	0	0
r0817	h[m] + nadph[m] + c6dcoa[m] -> nadp[m] + c60coa[m]	0	0	0	0	2.2956	0	0	0
r0818	h[m] + nadph[m] + c18dcoa[m] -> nadp[m] + c180coa[m]	0	0	0	0	0	0	0	0
r0819	h2o[c] + c160coa[c] -> h[c] + coa[c] + c160[c]	0	0	0	0	0	0	0	0
r0820	h2o[c] + c180coa[c] -> h[c] + coa[c] + c180[c]	0	0	0	0	0	0	0	0
r0821	h2o[c] + c181coa[c] -> h[c] + coa[c] + c181[c]	0	0	0	0	0	0	0	0
r0822	h2o[c] + c182coa[c] -> h[c] + coa[c] + c182[c]	0	0	0	0	0	0	0	0
r0823	nad[c] + gl[c] -> h[c] + nadh[c] + glyal[c]	0	0	0	0	0	0	0	0
r0824	nadp[c] + gl[c] -> h[c] + nadph[c] + glyal[c]	0	0	0	0	0	0	0	0
r0825	2 h[m] + fad[m] + gltcoa[m] -> fadh2[m] + co2[m] + cronylcoa[m]	1.6271e-25	0.326163	1.63111e-26	0.280648	0	0.271742	0	0.226446
r0826	nadph[c] + 2 feri[m] -> h[m] + nadp[c] + 2 fero[m]	0	0	0	0	0	0	0	0
r0827	h[m] + fad[m] + c60coa[m] -> fadh2[m] + c6dcoa[m]	0	0	0	0	2.2956	-1.16412e-26	0	0
r0828	h[m] + fad[m] + c40coa[m] -> fadh2[m] + c4dcoa[m]	0	0.207607	0	0.160357	0	0.151111	0	0.104089
r0829	coa[m] + c18ocoa[m] -> accoa[m] + c160coa[m]	0	0	0	0	0	0	0	0
r0830	coa[m] + c16ocoa[m] -> accoa[m] + c140coa[m]	0	0	0	0	0	0	0	0
r0831	coa[m] + c14ocoa[m] -> accoa[m] + c120coa[m]	0	0	0	0	0	0	0	0
r0832	coa[m] + c12ocoa[m] -> accoa[m] + c100coa[m]	0	0	0	0	0	0	0	0
r0833	coa[m] + c10ocoa[m] -> accoa[m] + c80coa[m]	0	0	0	0	0	0	0	0
r0834	coa[m] + c8ocoa[m] -> accoa[m] + c60coa[m]	0	0	0	0	0	0	0	0
r0835	coa[m] + c6ocoa[m] -> accoa[m] + c40coa[m]	0	0	0	0	0	0	0	0
r0836	nad[m] + c18hcoa[m] <=> h[m] + nadh[m] + c18ocoa[m]	0	0	0	0	0	0	0	0
r0837	nad[m] + c16hcoa[m] <=> h[m] + nadh[m] + c16ocoa[m]	0	0	0	0	0	0	0	0
r0838	nad[m] + c14hcoa[m] <=> h[m] + nadh[m] + c14ocoa[m]	0	0	0	0	0	0	0	0
r0839	nad[m] + c12hcoa[m] <=> h[m] + nadh[m] + c12ocoa[m]	0	0	0	0	0	0	0	0
r0840	nad[m] + c10hcoa[m] <=> h[m] + nadh[m] + c10ocoa[m]	0	0	0	0	0	0	0	0
r0841	nad[m] + c8hcoa[m] <=> h[m] + nadh[m] + c8ocoa[m]	0	0	0	0	0	0	0	0
r0842	nad[m] + c6hcoa[m] <=> h[m] + nadh[m] + c6ocoa[m]	0	0	0	0	0	0	0	0
r0843	nad[m] + c4hcoa[m] <=> h[m] + nadh[m] + aaccoa[m]	1.23231e-25	0.207607	-1.67526e-26	0.160357	0	0.151111	0	0.104089
r0844	c18hcoa[m] <=> h2o[m] + c18dcoa[m]	0	0	0	0	0	0	0	0
r0845	c16hcoa[m] <=> h2o[m] + c16dcoa[m]	0	0	0	0	0	0	0	0
r0846	c14hcoa[m] <=> h2o[m] + c14dcoa[m]	0	0	0	0	0	0	0	0
r0847	c12hcoa[m] <=> h2o[m] + c12dcoa[m]	0	0	0	0	0	0	0	0
r0848	c10hcoa[m] <=> h2o[m] + c10dcoa[m]	0	0	0	0	0	0	0	0
r0849	c8hcoa[m] <=> h2o[m] + c8dcoa[m]	0	0	0	0	0	0	0	0
r0850	c6hcoa[m] <=> h2o[m] + c6dcoa[m]	0	0	0	0	0	0	0	0
r0851	c4hcoa[m] <=> h2o[m] + c4dcoa[m]	-1.23355e-25	-0.207607	1.67515e-26	-0.160357	0	-0.151111	0	-0.104089
r0852	atp[c] + coa[c] + c181[c] -> h[c] + amp[c] + ppi[c] + c181coa[c]	0.120528	0.18446	0.120528	0.18716	0.120528	0.187688	0.120528	0.190375
r0853	atp[c] + coa[c] + c182[c] -> h[c] + amp[c] + ppi[c] + c182coa[c]	0.114083	0.174596	0.114083	0.177151	0.114083	0.177651	0.114083	0.180195
r0854	atp[c] + coa[c] + c183[c] -> h[c] + amp[c] + ppi[c] + c183coa[c]	0.0103126	0.0157827	0.0103126	0.0160137	0.0103126	0.0160589	0.0103126	0.0162888
r0855	atp[c] + coa[c] + c40[c] -> h[c] + amp[c] + ppi[c] + c40coa[c]	0	0	0	0	0	0	0	0
r0856	atp[c] + coa[c] + c60[c] -> h[c] + amp[c] + ppi[c] + c60coa[c]	0	0	0	0	0	0	0	0
r0857	atp[c] + coa[c] + c80[c] -> h[c] + amp[c] + ppi[c] + c80coa[c]	0	0	0	0	0	0	0	0
r0858	atp[c] + coa[c] + c100[c] -> h[c] + amp[c] + ppi[c] + c100coa[c]	0	0	0	0	0	0	0	0
r0859	atp[c] + coa[c] + c120[c] -> h[c] + amp[c] + ppi[c] + c120coa[c]	0.00773443	0.011837	0.00773443	0.0120103	0.00773443	0.0120442	0.00773443	0.0122166
r0860	atp[c] + coa[c] + c140[c] -> h[c] + amp[c] + ppi[c] + c140coa[c]	0.00418949	0.00641172	0.00418949	0.00650556	0.00418949	0.00652392	0.00418949	0.00661731
r0861	atp[c] + coa[c] + c141[c] -> h[c] + amp[c] + ppi[c] + c141coa[c]	0.00386722	0.00591851	0.00386722	0.00600513	0.00386722	0.00602208	0.00386722	0.00610829
r0862	atp[c] + coa[c] + c160[c] -> h[c] + amp[c] + ppi[c] + c160coa[c]	0.0496293	0.0759542	0.0496293	0.0770659	0.0496293	0.0772834	0.0496293	0.0783897
r0863	atp[c] + coa[c] + c161[c] -> h[c] + amp[c] + ppi[c] + c161coa[c]	0.00644536	0.00986418	0.00644536	0.0100086	0.00644536	0.0100368	0.00644536	0.0101805
r0864	atp[c] + coa[c] + c162[c] -> h[c] + amp[c] + ppi[c] + c162coa[c]	0	0	0	0	0	0	0	0
r0865	atp[c] + coa[c] + c180[c] -> h[c] + amp[c] + ppi[c] + c180coa[c]	0.00837897	0.0128234	0.00837897	0.0130111	0.00837897	0.0130478	0.00837897	0.0132346
r0866	atp[c] + coa[c] + c181[c] -> h[c] + amp[c] + ppi[c] + c181coa[c]	0.120528	0.18446	0.120528	0.18716	0.120528	0.187688	0.120528	0.190375
r0867	atp[c] + coa[c] + c182[c] -> h[c] + amp[c] + ppi[c] + c182coa[c]	0.114083	0.174596	0.114083	0.177151	0.114083	0.177651	0.114083	0.180195
r0868	atp[c] + coa[c] + c183[c] -> h[c] + amp[c] + ppi[c] + c183coa[c]	0.0103126	0.0157827	0.0103126	0.0160137	0.0103126	0.0160589	0.0103126	0.0162888
r0869	nadp[c] + chtrol[c] <=> h[c] + nadph[c] + destol[c]	0	0	0	0	0	0	0	0
r0870	h[c] + nadph[c] + dhdestol[c] <=> nadp[c] + pvd3[c]	0	0	0	0	0	0	0	0
r0871	magly[c] + chlestr[c] -> dagly[c] + chtrol[c]	0	0	0	0	0	0	0	0
r0872	3 o2[c] + 2 h[c] + 3 nadph[c] + lnst[c] -> 4 h2o[c] + 3 nadp[c] + for[c] + dctol[c]	0	0	0	0	0	0	0	0
r0873	h[c] + nadph[c] + dctol[c] -> nadp[c] + dcdol[c]	0	0	0	0	0	0	0	0
r0874	3 o2[c] + 2 h[c] + 3 nadph[c] + dcdol[c] -> 4 h2o[c] + 3 nadp[c] + dcda[c]	0	0	0	0	0	0	0	0
r0875	nadp[c] + dcda[c] -> co2[c] + nadph[c] + cdol[c]	0	0	0	0	0	0	0	0
r0876	3 o2[c] + 4 h[c] + 3 nadph[c] + cdol[c] -> 4 h2o[c] + 3 nadp[c] + cda[c]	0	0	0	0	0	0	0	0
r0877	h[c] + cda[c] -> co2[c] + zymst[c]	0	0	0	0	0	0	0	0
r0878	epst[c] <=> fest[c]	0	0	0	0	0	0	0	0
r0879	nadph[c] + epst[c] -> 3 h[c] + nadp[c] + ergod[c]	0	0	0	0	0	0	0	0
r0880	nadp[c] + ergod[c] -> h[c] + nadph[c] + egteol[c]	0	0	0	0	0	0	0	0
r0881	h[c] + nadph[c] + egteol[c] -> nadp[c] + egstr[c]	0	0	0	0	0	0	0	0
r0882	h[c] + nadph[c] + pvd3[c] -> nadp[c] + chtrol[c]	0	0	0	0	0	0	0	0
r0883	sam[c] + zymst[c] -> h[c] + sah[c] + fest[c]	0	0	0	0	0	0	0	0
r0884	h[c] + nadph[c] + cdol[c] -> nadp[c] + mzymst[c]	0	0	0	0	0	0	0	0
r0885	acylcoa[c] + chtrol[c] <=> coa[c] + chlestr[c]	0	0	0	0	0	0	0	0
r0886	dagly[c] + egstr[c] -> magly[c] + ergose[c]	0.00959335	0.014682	0.00959335	0.0148969	0.00959335	0.0149389	0.00959335	0.0151527
r0887	h2o[c] + ergose[c] -> 0.026 c180[c] + 0.374 c181[c] + 0.354 c182[c] + 0.032 c183[c] + 0.024 c120[c] + 0.154 c160[c] + 0.02 c161[c] + 0.013 c140[c] + 0.012 c141[c] + egstr[c]	0.00959335	0.014682	0.00959335	0.0148969	0.00959335	0.0149389	0.00959335	0.0151527
r0888	atp[c] + glyn[c] -> h[c] + adp[c] + t3p2[c]	997.165	0	997.127	997.438	0	3.40486e-27	0	0
r0889	h2o[c] + atp[c] -> h[c] + pi[c] + adp[c]	1.9	1.9	1.9	1.9	1.9	1.9	1.9	1.9
tr_ac	ac[e] <=> ac[c]	-3.46945e-18	3.46945e-18	0	3.46945e-18	3.46945e-18	3.46945e-18	0	-6.93889e-18
tr_accoa	accoa[m] <=> accoa[c]	-2.23101e-16	-0.118556	2.5722e-16	-0.120291	-6.44633e-17	-0.120631	7.39508e-17	-0.122357
tr_aco	aco[m] <=> aco[c]	0.702	0	0.702	0	0.702	0	0.702	0
tr_ad	ad[e] <=> ad[c]	1.03162e-26	1.28055e-30	-1.0951e-28	3.00783e-28	1.01228e-27	1.11902e-28	2.88902e-29	9.88891e-26
tr_aglc	adglc[e] -> adglc[c]	0	0	0	0	0	0	0	0
tr_aka	aka[m] -> aka[c]	0	0	0	0	0	0	0	0
tr_akg	akg[e] <=> akg[c]	2.27374e-13	-2.27374e-13	2.24987e-13	-3.94129e-15	9.84768e-14	-1.99174e-13	-2.27374e-13	2.27374e-13
tr_akg	akg[c] <=> akg[m]	-983.089	-975.513	-0.341934	-0.493016	-0.341934	-0.532465	-985.273	-981.063
tr_akg	akg[m] -> akg[c]	0	0	0	0	0	0	0	0
tr_ala	ala[e] <=> ala[c]	0	1.58568e-13	-6.93889e-18	6.93889e-18	2.50841e-14	-6.08888e-14	-1.47833e-13	-1.47833e-13
tr_ama	ama[c] -> ama[m]	0	0	0	0	0	0	0	0
tr_amp	amp[e] -> amp[c]	0	0	0	0	0	0	0	0
tr_aobut	aobut[c] <=> aobut[m]	0	0	0	0	0	0	0	0
tr_aol	aol[e] <=> aol[c]	0	0	0	0	0	0	0	0
tr_arab	arab[e] <=> arab[c]	0	0	0	0	0	0	0	0
tr_arg	arg[e] <=> arg[c]	-3.46945e-18	0	0	6.93889e-18	3.46945e-18	-6.93889e-18	-6.93889e-18	0
tr_arg	arg[c] <=> arg[m]	0	0	0	0	0	0	0	0
tr_asn	asn[e] <=> asn[c]	-1.73472e-18	-3.46945e-18	0	3.46945e-18	1.73472e-18	0	-1.73472e-18	-3.46945e-18
tr_asp	asp[e] <=> asp[c]	2.91892e-13	2.16237e-13	-3.46945e-18	0	6.93889e-18	1.38778e-17	-1.16306e-13	1.94428e-14
tr_asp	asp[m] <=> asp[c]	982.854	975.154	0.107166	0.166411	0.107166	0.166881	985.038	980.693
tr_banm	bamn[c] <=> bamn[e]	0	0	0	0	0	0	0	0
tr_bdfru	bdfru[e] <=> bdfru[c]	0	0	0	0	0	0	0	0
tr_bdglc	bdglc[e] -> bdglc[c]	0	0	0	0	0	0	0	0
tr_bglac	bgal[e] -> bgal[c]	0	0	0	0	0	0	0	0
tr_blaras	blaras[e] <=> blaras[c]	0	0	0	0	0	0	0	0
tr_bn	bn[e] <=> bn[c]	0	0	0	0	0	0	0	0
tr_bt	h[e] + bt[e] <=> h[c] + bt[c]	0	0	0	0	0	0	0	0
tr_c100coa	c100coa[c] <=> c100coa[m]	-1.82332e-18	0	0	0	0	0	0	0
tr_c120	c120[e] <=> c120[c]	1.30104e-18	0	-5.42101e-20	1.68051e-18	-4.60786e-19	3.25261e-19	5.42101e-20	2.00577e-18
tr_c120coa	c120coa[c] <=> c120coa[m]	0	0	0	0	0	0	0	0
tr_c140	c140[e] <=> c140[c]	8.67362e-19	-7.04731e-19	1.0842e-19	-2.43945e-19	-8.40257e-19	-8.13152e-19	-2.43945e-19	-8.67362e-19
tr_c140coa	c140coa[c] <=> c140coa[m]	0	0	0	0	0	0	0	0
tr_c160	c160[e] <=> c160[c]	1.30104e-18	0	-9.32414e-18	-8.67362e-19	5.63785e-18	6.07153e-18	6.28837e-18	4.33681e-19
tr_c160coa	c160coa[c] <=> c160coa[m]	0	0	0	0	0	0	0	0
tr_c161	c161[e] <=> c161[c]	2.24972e-18	2.92735e-18	1.11131e-18	8.13152e-19	-5.14996e-19	-8.67362e-19	3.52366e-19	-9.21572e-19
tr_c161coa	c161coa[c] <=> c161coa[m]	0	0	0	0	0	0	0	0
tr_c162coa	c162coa[c] <=> c162coa[m]	0	0	0	0	0	0	0	0
tr_c180	c180[e] <=> c180[c]	0	3.25261e-19	-1.51788e-18	-4.87891e-19	-1.68051e-18	-3.36103e-18	-2.22261e-18	-3.46945e-18
tr_c180coa	c180coa[c] <=> c180coa[m]	0	0	0	0	0	0	0	0
tr_c181	c181[e] <=> c181[c]	-6.93889e-18	-1.99493e-17	1.30104e-18	-1.73472e-17	6.93889e-18	-5.20417e-18	-3.9465e-17	-1.56125e-17
tr_c181coa	c181coa[c] <=> c181coa[m]	0	0	0	0	0	0	0	0
tr_c182	c182[e] -> c182[c]	0	0	0	0	0	0	0	0
tr_c182coa	c182coa[c] <=> c182coa[m]	0	0	0	0	0	0	0	0
tr_c183	c183[e] <=> c183[c]	1.19262e-18	-2.27682e-18	-6.50521e-19	-1.78893e-18	5.42101e-19	1.02999e-18	-4.87891e-19	-8.13152e-19
tr_c183coa	c183coa[c] <=> c183coa[m]	0	0	0	0	0	0	0	0
tr_c40coa	c40coa[c] <=> c40coa[m]	-3.96834e-26	-0.118556	-3.34828e-26	-0.120291	0	-0.120631	0	-0.122357
tr_c60	c60[e] <=> c60[c]	0	0	0	0	0	0	0	0
tr_c60coa	c60coa[c] <=> c60coa[m]	0	0	0	0	0	0	0	0
tr_c80	c80[e] <=> c80[c]	0	0	0	0	0	0	0	0
tr_c80coa	c80coa[c] <=> c80coa[m]	0	0	0	0	0	0	0	0
tr_ca	ca[e] <=> ca[c]	0	0	0	0	0	0	0	0
tr_car	car[c] <=> car[m]	0	0	0	0	0	0	0	0
tr_cdpcln	cdpcln[c] <=> cdpcln[m]	0	0	0	0	0	0	0	0
tr_cellob	cellob[e] <=> cellob[c]	0	0	0	0	0	0	0	0
tr_chit	chit[e] <=> chit[c]	0	0	0	0	0	0	0	0
tr_cit	cit[e] <=> cit[c]	-1.11022e-16	-1.11022e-16	1.11022e-16	0	0	0	-1.11022e-16	2.22045e-16
tr_cit	cit[c] <=> cit[m]	-0.667432	-0.902902	-0.667432	-0.916117	-0.667432	-0.918703	-0.667432	-0.931854
tr_citr	citr[c] <=> citr[m]	-0.0249835	-0.0382355	-0.0249835	-0.0387951	-0.0249835	-0.0389046	-0.0249835	-0.0394615
tr_cln	cln[c] <=> cln[m]	0	0	0	0	0	0	0	0
tr_cln/h	cln[e] -> cln[c]	0	0	0	0	0	0	0	0
tr_co2	co2[e] <=> co2[c]	-1.67958	-2.4746	-1.67958	-2.35995	-1.67958	-2.33752	-1.67958	-2.22342
tr_co2	co2[c] <=> co2[m]	-1.77029	-2.9396	-4.71386	-2.78147	-1.77029	-2.75053	-1.77029	-2.59316
tr_ctp:h	ctp[m] <=> ctp[c]	0	0	0	0	0	0	0	0
tr_cys	cys[e] <=> cys[c]	-8.67362e-19	3.46945e-18	-2.60209e-18	1.73472e-18	6.07153e-18	1.73472e-18	-4.16334e-17	-3.46945e-18
tr_cyts	cyts[e] -> cyts[c]	0	0	0	0	0	0	0	0
tr_d6pgc	d6pgc[e] <=> d6pgc[c]	0	0	0	0	0	0	0	0
tr_dasp	dasp[e] <=> dasp[c]	2.60171e-24	0	0	0	-2.39182e-27	-6.60644e-28	-0.53648	-3.39277e-24
tr_dglc	dglc[e] -> dglc[c]	0	0	1.718	1.718	0	0	0	0
tr_dglc:h	h[e] + dglc[e] -> h[c] + dglc[c]	1.718	1.718	0	0	1.718	1.718	1.718	1.718
tr_doris	doris[c] <=> doris[e]	0	0	0	0	0	0	0	0
tr_dtb	dtb[m] <=> dtb[c]	0	0	0	0	0	0	0	0
tr_eth	eth[c] <=> eth[e]	0	-2.18108e-13	1.13687e-13	1.13687e-13	2.27372e-13	2.27374e-13	1.13687e-13	1.13687e-13
tr_eth	eth[c] <=> eth[m]	0	0	0	0	2.14484e-18	0	0	0
tr_fe	fe[e] <=> fe[c]	0	0	0	0	0	0	0	0
tr_for	for[e] <=> for[c]	0	-3.46945e-18	0	6.93889e-18	0	-3.46945e-18	-3.46945e-18	-6.93889e-18
tr_for	for[c] <=> for[m]	0.0191089	0.0292449	0.0191089	0.0296729	0.0191089	0.0297567	0.0191089	0.0301827
tr_fru	dfru[e] -> dfru[c]	0	0	0	0	0	0	0	0
tr_fum	fum[e] <=> fum[c]	-6.93889e-18	-1.38778e-17	6.93889e-18	-1.38778e-17	4.44089e-16	-1.38778e-17	-6.93889e-18	0
tr_fum/succ	succ[c] + fum[m] <=> succ[m] + fum[c]	-0.0499576	-0.0764567	-0.0499576	-0.0775757	2.23186	-0.0777947	-0.0499576	-0.0789083
tr_gaba	gaba[c] <=> gaba[e]	0	0	0	0	0	0	0	0
tr_gaba	gaba[c] <=> gaba[m]	0	0	0	0	0	0	0	0
tr_galnt	galnt[e] <=> galnt[c]	0	0	0	0	0	0	0	0
tr_gdpman	gdpman[e] -> gdpman[c]	0	0	0	0	0	0	0	0
tr_gl:h	h[e] + gl[e] <=> h[c] + gl[c]	0	0	0	0	0	0	0	0
tr_gl3p	gl3p[c] <=> gl3p[m]	0	0	0	0	0	0	0	0
tr_glac	gal[e] -> gal[c]	0	0	0	0	0	0	0	0
tr_glcnt	glcnt[e] <=> glcnt[c]	0	0	0	0	0	0	0	0
tr_gln	gln[e] <=> gln[c]	1.04083e-17	3.46945e-18	-6.93889e-18	1.04083e-17	-1.38778e-17	-3.46945e-18	1.04083e-17	-2.42861e-17
tr_gln	gln[c] <=> gln[m]	0.0249835	0.0382355	0.0249835	0.0387951	0.0249835	0.0389046	0.0249835	0.0394615
tr_glu	glu[e] <=> glu[c]	-1.53946e-13	1.03667e-13	-2.05974e-13	-4.98004e-14	-1.71529e-14	-1.5235e-13	2.36079e-13	5.34711e-13
tr_glu	glu[m] <=> glu[c]	-983.024	-975.415	-0.277294	-0.354691	-0.277294	-0.431806	-985.209	-980.961
tr_gly	gly[e] <=> gly[c]	-1.02602e-13	2.96291e-15	2.77996e-13	9.58608e-14	1.38778e-17	-1.38778e-17	2.28775e-14	4.87596e-14
tr_glybet	bet[c] -> bet[m]	0	0	0	0	0	0	0	0
tr_glypcln	glypcln[e] <=> glypcln[c]	0	0	0	0	0	0	0	0
tr_glypcln	glypcln[m] <=> glypcln[c]	0	0	0	0	0	0	0	0
tr_gn	gn[e] <=> gn[c]	1.61641e-24	-2.64426e-29	0	0	0	0	8.40086e-31	2.80856e-30
tr_gtp/gdp	gtp[c] + gdp[m] -> gdp[c] + gtp[m]	984.311	976.517	1.56408	1.49902	1.56408	1.49356	986.495	981.989
tr_gua	gua[c] <=> gua[e]	0	0	0	0	0	0	0	0
tr_h2o	h2o[e] <=> h2o[c]	-4.52686	-5.33577	-4.52686	-5.16242	-4.52686	-5.1285	-4.52686	-4.95599
tr_h2o	h2o[c] <=> h2o[m]	-17.6219	-25.0857	-17.6219	-22.3601	-14.3634	-21.8267	-14.9009	-19.1143
tr_hco3	hco3[m] <=> hco3[c]	-0.0249835	-0.0382355	-2.96855	-0.0387951	-0.0249835	-0.0389046	-0.0249835	-0.0394615
tr_hcys	hcys[c] -> hcys[m]	0	0	0	0	0	0	0	0
tr_his	his[e] <=> his[c]	0	0	0	3.46945e-18	1.73472e-18	1.73472e-18	-1.73472e-18	0
tr_hisan	hisan[c] <=> hisan[e]	0	0	0	0	0	0	0	0
tr_hno3	hno3[e] -> hno3[c]	0	0	0	0	0	0	0	0
tr_ia	ia[c] <=> ia[e]	0.702	0	0.702	0	0.702	0	0.702	0
tr_ici	icit[e] <=> icit[c]	0	0	0	0	0	0	0	0
tr_icit	mal[m] + icit[c] <=> mal[c] + icit[m]	0	0	0	0	0	0	0	0
tr_idol	idol[e] -> idol[c]	0	0	0	0	0	0	0	0
tr_ile	ile[e] <=> ile[c]	3.46945e-18	-6.93889e-18	-3.46945e-18	3.46945e-18	6.93889e-18	3.46945e-18	-3.46945e-18	3.46945e-18
tr_ile	ile[c] <=> ile[m]	-0.0191089	-0.0292449	-0.0191089	-0.0296729	-0.0191089	-0.0297567	-0.0191089	-0.0301827
tr_imlt:h	imlt[e] <=> imlt[c]	0	0	0	0	0	0	0	0
tr_ins	ins[c] <=> ins[e]	0	0	0	0	0	0	0	0
tr_ipyr	ipyr[m] -> ipyr[c]	0	0	0	0	0	0	0	0
tr_k/h	h[c] + k[e] -> h[e] + k[c]	0	0	0	0	0	0	0	0
tr_k/h	h[c] + k[m] <=> h[m] + k[c]	0	0	0	0	0	0	0	0
tr_k:h	h[e] + k[e] -> h[c] + k[c]	0	0	0	0	0	0	0	0
tr_kyn	kyn[c] -> kyn[m]	0	0	0	0	0	0	0	0
tr_lac	lac[e] <=> lac[c]	0	1.13687e-13	5.55112e-17	0	-1.11022e-16	-8.88178e-16	0	1.13687e-13
tr_lac	lac[c] <=> lac[m]	-983.23	-979.003	-0.4828	-3.85848	-0.811139	-3.78282	-988.047	-984.114
tr_lact	lact[e] -> lact[c]	0	0	0	0	0	0	0	0
tr_larab	larab[e] <=> larab[c]	0	0	0	0	0	0	0	0
tr_leu	leu[e] <=> leu[c]	6.93889e-18	6.93889e-18	-6.93889e-18	0	0	0	0	6.93889e-18
tr_leu	leu[m] <=> leu[c]	0.0361508	0.0553264	0.0361508	0.0561361	0.0361508	0.0562946	0.0361508	0.0571004
tr_llac	llac[e] <=> llac[c]	0	0	0	0	0	0	0	0
tr_llac	llac[c] <=> llac[m]	0	0	0	0	0	0	0	0
tr_lxul	lxul[e] -> lxul[c]	0	0	0	0	0	0	0	0
tr_lys	lys[e] <=> lys[c]	3.46945e-18	6.93889e-18	0	6.93889e-18	3.46945e-18	0	0	0
tr_lys	lys[m] <=> lys[c]	0.0175132	0.0268027	0.0175132	0.027195	0.0175132	0.0272717	0.0175132	0.0276621
tr_mal/pi	mal[c] + pi[e] <=> pi[c] + mal[e]	0	0	0	0	0	0	0	0
tr_mal/pi	pi[m] + mal[c] <=> pi[c] + mal[m]	984.261	976.441	1.51412	1.42145	1.51412	1.41576	986.445	981.91
tr_man	man[e] -> man[c]	0	0	0	0	0	0	0	0
tr_mannan	mannan[e] -> mannan[c]	0	0	0	0	0	0	0	0
tr_meli	meli[e] -> meli[c]	0	0	0	0	0	0	0	0
tr_met	met[e] <=> met[c]	-1.73472e-18	5.20417e-18	3.46945e-18	5.20417e-18	0	1.73472e-18	-6.93889e-18	-1.04083e-17
tr_methol	meth[e] <=> meth[c]	0	0	0	0	3.02226e-27	-6.74105e-27	0	0
tr_methol	meth[c] <=> meth[m]	0	0	0	0	0	0	0	0
tr_mlt	mlt[e] -> mlt[c]	0	0	0	0	0	0	0	0
tr_mlt:h	mlt[e] -> mlt[c]	0	0	0	0	0	0	0	0
tr_mnt	mnt[e] <=> mnt[c]	0	-1.38778e-17	-1.38778e-17	0	0	0	-2.08167e-17	-1.38778e-17
tr_na	na[m] <=> na[c]	0	0	0	0	0	0	0	0
tr_na/h	h[c] + na[e] <=> h[e] + na[c]	0	0	0	0	0	0	0	0
tr_nad	nad[c] <=> nad[m]	2.49852e-17	1.01405e-27	1.89514e-28	-9.70037e-19	1.28347e-17	-2.85408e-27	-4.30484e-28	-2.34183e-25
tr_nag	nag[e] -> nag[c]	0	0	0	0	0	0	0	0
tr_nh3	nh3[e] -> nh3[c]	0.682103	1.04391	0.682103	1.05919	0.682103	1.06218	1.21858	1.07739
tr_o2	o2[e] <=> o2[c]	1.38252	1.80896	1.38252	1.63428	1.38252	1.6001	1.11428	1.42627
tr_o2	o2[c] <=> o2[m]	1.30952	1.69724	1.30952	1.52093	1.30952	1.48643	1.04128	1.31096
tr_oa/pi	oa[e] + pi[c] <=> oa[c] + pi[e]	-2.61567e-24	0	0	0	2.4038e-27	6.58733e-28	0.53648	4.61853e-24
tr_oa/pi	oa[c] + pi[m] <=> oa[m] + pi[c]	0	0	0	0	0	0	0	0
tr_orn	orn[m] <=> orn[c]	0.0244391	0.0374024	0.0244391	0	0.0244391	0.0380569	0.0244391	0.0386017
tr_ota	ota[c] <=> ota[e]	0	0	0	0	0	0	0	0
tr_oxal	oxal[e] <=> oxal[c]	0	0	0	0	0	0	0	0
tr_p	cmp[m] <=> cmp[c]	0	0	0	0	0	0	0	0
tr_pap	pap[c] <=> pap[m]	-1.17238e-13	-6.27669e-14	1.98207e-15	0	-3.88972e-17	4.1208e-16	0	1.78671e-13
tr_pcln	pcln[e] <=> pcln[c]	0	0	0	0	0	0	0	0
tr_pcln	pcln[m] <=> pcln[c]	0	0	0	0	0	0	0	0
tr_pep	pep[c] <=> pep[m]	0	0	0	0	0	0	0	0
tr_phe	phe[e] <=> phe[c]	0	0	1.73472e-18	3.46945e-18	1.73472e-18	0	-1.73472e-18	0
tr_phe	phe[c] -> phe[m]	0	0	0	0	0	0	0	0
tr_pi	pi[e] <=> pi[c]	0.0808545	0.123742	0.0808545	0.125553	0.0808545	0.125908	0.617335	0.12771
tr_pnto	pnto[e] <=> pnto[c]	0	0	0	0	0	0	0	0
tr_pro	pro[e] <=> pro[c]	0	0	0	6.93889e-18	-3.46945e-18	-6.93889e-18	-6.93889e-18	6.93889e-18
tr_pro	pro[c] <=> pro[m]	0	0	0	0	0	0	0	0
tr_pyr	pyr[e] <=> pyr[c]	0	-2.27374e-13	-1.18128e-13	-1.1724e-13	-3.16636e-13	6.21725e-15	2.27374e-13	-1.13687e-13
tr_pyr	pyr[c] <=> pyr[m]	984.92	980.516	2.17319	5.39327	2.50153	5.32195	989.737	985.676
tr_qt	qt[e] <=> qt[c]	0	0	0	0	0	0	0	0
tr_rib	rib[e] -> rib[c]	0	0	0	0	0	0	0	0
tr_rl	rl[e] -> rl[c]	0	0	0	0	0	0	0	0
tr_Sali	sali[c] <=> sali[e]	0	0	0	0	0	0	0	0
tr_satn	satn[e] -> satn[c]	0	0	0	0	0	0	0	0
tr_ser	ser[e] <=> ser[c]	6.76334e-14	2.88658e-14	-2.29379e-13	-2.60569e-13	0	0	1.80411e-16	-6.93889e-18
tr_slf	slf[e] -> slf[c]	0.013785	0.021097	0.013785	0.0214058	0.013785	0.0214662	0.013785	0.0217735
tr_slfi	slfi[c] -> slfi[e]	0	0	0	0	0	0	0	0
tr_sor	sor[e] -> sor[c]	0	0	0	0	0	0	0	0
tr_sot	sot[e] <=> sot[c]	0	0	0	0	0	0	0	0
tr_spere	spere[c] <=> spere[e]	0	0	0	0	0	0	0	0
tr_sphe	sphe[e] -> sphe[c]	0	0	0	0	0	0	0	0
tr_sphep	sphep[c] <=> sphep[e]	0	0	0	0	0	0	0	0
tr_sprmd	sprmd[c] <=> sprmd[e]	0	0	0	0	0	0	0	0
tr_star	star[e] -> star[c]	0	0	0	0	0	0	0	0
tr_succ/pi	succ[c] + pi[e] <=> pi[c] + succ[e]	0	0	0	0	0	0	0	0
tr_succ/pi	succ[c] + pi[m] <=> succ[m] + pi[c]	0.0499576	0.0764567	0.0499576	0.0775757	0.0499576	0.0777947	0.0499576	0.0789083
tr_thr	thr[e] <=> thr[c]	-6.93889e-18	0	-1.38778e-17	0	6.93889e-18	0	-1.04083e-17	0
tr_thr	thr[c] <=> thr[m]	0.0191089	0.0292449	0.0191089	0.0296729	0.0191089	0.0297567	0.0191089	0.0301827
tr_tre	tre[e] <=> tre[c]	0	0	0	0	0	0	0	0
tr_trp	trp[e] <=> trp[c]	0	0	0	0	0	1.73472e-18	-8.67362e-19	-1.73472e-18
tr_trp	trp[c] <=> trp[m]	0	0	0	0	0	0	0	0
tr_tyr	tyr[e] <=> tyr[c]	-1.73472e-18	-3.46945e-18	0	3.46945e-18	-1.73472e-18	-3.46945e-18	-3.46945e-18	0
tr_ura	ura[e] -> ura[c]	0	0	0	0	0	0	0	0
tr_urate	urate[c] -> urate[e]	0	0	0	0	0	0	0	0
tr_urea	urea[e] <=> urea[c]	0	0	0	0	0	0	0	0
tr_urea	urea[c] <=> urea[m]	0	0	0	0	0	0	0	0
tr_uri	uri[e] -> uri[c]	0	0	0	0	0	0	0	0
tr_val	val[e] <=> val[c]	0	0	0	6.93889e-18	3.46945e-18	-6.93889e-18	-3.46945e-18	-6.93889e-18
tr_val	val[c] <=> val[m]	-0.0250892	-0.0383973	-0.0250892	-0.0389593	-0.0250892	-0.0390693	-0.0250892	-0.0396286
tr_vb2	vb2[c] <=> vb2[e]	0	0	0	0	0	0	0	0
tr_ve	ve[c] <=> ve[e]	0	0	0	0	0	0	0	0
tr_xol	xol[e] <=> xol[c]	0	0	-1.54933e-13	-1.13687e-13	2.22045e-16	2.22045e-16	0	0
tr_xul	xul[e] -> xul[c]	0	0	0	0	0	0	0	0
tr_xyl	xyl[e] -> xyl[c]	0	0	0	0	0	0	0	0
tr_xylan	xylan[e] <=> xylan[c]	0	0	0	0	0	0	0	0
r0890	amp[c] + itp[c] <=> adp[c] + idp[c]	-3.59455	-1.13655	-1.87655	0.3888	-3.59455	-1.3669	-7.29692	-1.55861
r0891	amp[m] + itp[m] <=> adp[m] + idp[m]	0	0	0	0	0	0	0	0
r0892	gtp[c] + uri[c] -> h[c] + gdp[c] + ump[c]	0	0	0	0	0	0	0	0
r0893	atp[c] + uri[c] -> h[c] + adp[c] + ump[c]	0	0	0	0	0	0	0	0
r0894	gtp[c] + cytd[c] -> h[c] + gdp[c] + cmp[c]	0	-2.3633e-29	0	0	3.46976e-28	1.97085e-28	0	0
r0895	2 adp[m] <=> h[m] + atp[m] + amp[m]	984.311	976.517	1.56408	1.49902	1.56408	1.49356	986.495	981.989
r0896	adp[m] + gdp[m] <=> h[m] + amp[m] + gtp[m]	-984.311	-976.517	-1.56408	-1.49902	-1.56408	-1.49356	-986.495	-981.989
r0897	h2o[c] + udp[c] -> 2 h[c] + pi[c] + ump[c]	0	0	0	0	0	0	0	0
r0898	h2o[c] + gtp[c] -> 2 h[c] + ppi[c] + gmp[c]	0	0	0	0	0	0	0	0
r0899	h2o[c] + dgtp[c] -> 2 h[c] + ppi[c] + dgmp[c]	0	0	0	0	0	0	0	0
r0900	h2o[c] + xtp[c] -> 2 h[c] + ppi[c] + xmp[c]	0	0	0	0	0	0	0	0
r0901	h2o[c] + ditp[c] -> ppi[c] + dimp[c]	0	0	0	0	0	0	0	0
r0902	atp[c] + didp[c] <=> adp[c] + ditp[c]	0	0	0	0	0	0	0	0
r0903	pi[c] + gsn[c] <=> r1p[c] + gn[c]	0	0	0	0	0	0	9.17163e-29	1.23887e-25
r0904	h2o[c] + hiura[c] -> h[c] + houdhic[c]	0	0	0	0	0	0	0	0
r0905	houdhic[c] -> co2[c] + satn[c]	0	0	0	0	0	0	0	0
r0906	gtp[c] -> h[c] + ppi[c] + cgmp[c]	0	0	0	0	0	0	0	0
r0907	h2o[c] + 2 h[c] + att[c] -> nh3[c] + co2[c] + ugly[c]	0	0	0	0	0	0	0	0
r0908	h2o[c] + ugly[c] -> nh3[c] + uglx[c]	0	0	0	0	0	0	0	0
r0909	atp[c] + gdp[c] <=> adp[c] + gtp[c]	-15.6697	-20.4093	-998.416	-998.471	-994.124	-995.349	-5.49013	-14.7837
r0910	atp[c] + dgdp[c] <=> adp[c] + dgtp[c]	0.000670353	0.00102593	0.000670353	0.00104094	0.000670353	0.00104388	0.000670353	0.00105883
r0911	atp[c] + dadp[c] <=> adp[c] + datp[c]	0.000619026	0.000947377	0.000619026	0.000961243	0.000619026	0.000963956	0.000619026	0.000977755
r0912	atp[c] + h[c] + gmp[c] <=> adp[c] + gdp[c]	0.0054157	0.00828836	0.0054157	0.00840967	0.0054157	0.00843341	0.0054157	0.00855413
r0913	atp[c] + h[c] + dgmp[c] <=> adp[c] + dgdp[c]	2.00273e-25	-1.51729e-30	0	0	0	0	9.2542e-29	1.23899e-25
r0914	asp[c] + atp[c] + cair[c] <=> 2 h[c] + pi[c] + adp[c] + saicar[c]	0.0102824	0.0157365	0.0102824	0.0159668	0.0102824	0.0160118	0.0102824	0.0162411
r0915	atp[c] + fgam[c] -> h[c] + pi[c] + adp[c] + air[c]	0.0102824	0.0157365	0.0102824	0.0159668	0.0102824	0.0160118	0.0102824	0.0162411
r0916	gly[c] + atp[c] + pram[c] -> h[c] + pi[c] + adp[c] + gar[c]	0.0102824	0.0157365	0.0102824	0.0159668	0.0102824	0.0160118	0.0102824	0.0162411
r0917	asp[c] + gtp[c] + imp[c] -> 2 h[c] + pi[c] + gdp[c] + asuc[c]	0.0146918	0.0224847	0.0146918	0.0228138	0.0146918	0.0228782	0.0146918	0.0232057
r0918	h2o[c] + gln[c] + atp[c] + xmp[c] -> glu[c] + 3 h[c] + amp[c] + ppi[c] + gmp[c]	0.0054157	0.00828836	0.0054157	0.00840967	0.0054157	0.00843341	0.0054157	0.00855413
r0919	h2o[c] + gln[c] + atp[c] + fgar[c] -> glu[c] + h[c] + pi[c] + adp[c] + fgam[c]	0.0102824	0.0157365	0.0102824	0.0159668	0.0102824	0.0160118	0.0102824	0.0162411
r0920	atp[c] + idp[c] <=> adp[c] + itp[c]	-3.59455	-1.13655	-1.87655	0.3888	-3.59455	-1.3669	-7.29692	-1.55861
r0921	h2o[c] + itp[c] -> 2 h[c] + ppi[c] + imp[c]	0	0	0	0	0	0	0	0
r0922	h2o[c] + nad[c] + hyxn[c] -> h[c] + nadh[c] + xan[c]	2.58856e-22	9.21841e-28	1.91467e-28	2.82222e-25	0	0	2.19829e-28	0
r0923	h2o[c] + nad[c] + xan[c] -> h[c] + nadh[c] + urate[c]	0	0	0	0	0	0	0	0
r0924	adp[c] + rthio[c] -> h2o[c] + othio[c] + dadp[c]	0.000619026	0.000947377	0.000619026	0.000961243	0.000619026	0.000963956	0.000619026	0.000977755
r0925	rthio[c] + gdp[c] -> h2o[c] + othio[c] + dgdp[c]	0.000670353	0.00102593	0.000670353	0.00104094	0.000670353	0.00104388	0.000670353	0.00105883
r0926	h2o[c] + o2[c] + urate[c] <=> h2o2[c] + hiura[c]	0	0	0	0	0	0	0	0
r0927	h2o[c] + nad[c] + imp[c] -> h[c] + nadh[c] + xmp[c]	0.0054157	0.00828836	0.0054157	0.00840967	0.0054157	0.00843341	0.0054157	0.00855413
r0928	ad[c] + dr1p[c] <=> pi[c] + da[c]	1.84697e-25	9.57073e-28	7.5779e-28	2.82173e-25	-1.17488e-24	1.65744e-26	2.19075e-25	1.26393e-21
r0929	pi[c] + din[c] <=> hyxn[c] + dr1p[c]	0	9.20262e-28	6.889e-28	2.82173e-25	-1.17488e-24	1.64385e-26	2.19075e-25	0
r0930	pi[c] + inos[c] -> r1p[c] + hyxn[c]	0	0	-5.0641e-28	0	-9.57481e-27	-3.2457e-28	3.74142e-29	0
r0931	gn[c] + dr1p[c] <=> pi[c] + dg[c]	2.00249e-25	-1.51729e-30	0	0	0	0	9.25564e-29	1.23889e-25
r0932	pi[c] + xtsine[c] <=> r1p[c] + xan[c]	0	4.87232e-28	0	0	0	0	0	0
r0933	h2o[c] + gln[c] + prpp[c] -> glu[c] + h[c] + ppi[c] + pram[c]	0.0102824	0.0157365	0.0102824	0.0159668	0.0102824	0.0160118	0.0102824	0.0162411
r0934	ad[c] + prpp[c] <=> h[c] + amp[c] + ppi[c]	-2.59038e-22	-9.55792e-28	-8.673e-28	-2.81873e-25	1.17589e-24	-1.64625e-26	-2.19046e-25	-1.26383e-21
r0935	adp[c] + dadp[c] <=> atp[c] + h[c] + damp[c]	-1.84699e-25	1.39014e-30	-2.19757e-30	-1.14214e-28	1.08685e-27	0	8.85527e-29	-2.27719e-25
r0936	2 adp[c] <=> atp[c] + h[c] + amp[c]	995.042	1000	997.425	998.604	1000	1000	1000	1000
r0937	adp[c] + gdp[c] <=> h[c] + amp[c] + gtp[c]	1000	996.956	1000	1000	995.707	996.873	992.005	996.803
r0938	h2o[c] + amp[c] -> pi[c] + adn[c]	0	0	0	0	0	0	0	0
r0939	h2o[c] + damp[c] -> pi[c] + da[c]	0	1.39013e-30	0	-1.14214e-28	1.08685e-27	0	8.85541e-29	-2.27718e-25
r0940	h2o[c] + imp[c] -> pi[c] + inos[c]	0	0	0	0	0	0	0	0
r0941	h2o[c] + gmp[c] -> pi[c] + gsn[c]	0	0	0	0	0	0	0	0
r0942	h2o[c] + dgmp[c] -> pi[c] + dg[c]	0	0	0	0	0	0	-9.2542e-29	-1.23899e-25
r0943	h2o[c] + xmp[c] -> pi[c] + xtsine[c]	0	0	0	0	0	0	0	0
r0944	h2o[c] + camp[c] -> h[c] + amp[c]	0	0	0	0	0	0	0	0
r0945	h2o[c] + cgmp[c] -> h[c] + gmp[c]	0	0	0	0	0	0	0	0
r0946	h2o[c] + ccmp[c] -> h[c] + cmp[c]	0	0	0	0	0	0	0	0
r0947	h2o[c] + satn[c] <=> att[c]	0	0	0	0	0	0	0	0
r0948	prfica[c] <=> h2o[c] + imp[c]	0.0201075	0.0307731	0.0201075	0.0312235	0.0201075	0.0313116	0.0201075	0.0317598
r0949	h2o[c] + h[c] + ad[c] -> nh3[c] + hyxn[c]	2.58863e-22	0	0	0	0	0	0	0
r0950	h2o[c] + h[c] + gn[c] -> nh3[c] + xan[c]	0	0	0	0	0	0	0	0
r0951	h2o[c] + h[c] + adn[c] -> nh3[c] + inos[c]	0	0	0	0	0	0	0	0
r0952	h2o[c] + h[c] + da[c] -> nh3[c] + din[c]	0	9.20262e-28	6.889e-28	2.82173e-25	-1.17488e-24	1.65744e-26	2.19075e-25	0
r0953	h2o[c] + h[c] + amp[c] -> nh3[c] + imp[c]	0	0	0	0	0	0	0	0
r0954	h2o[c] + adprib[c] -> 2 h[c] + amp[c] + r5p[c]	0	0	0	0	0	0	0	0
r0955	h[c] + cair[c] <=> co2[c] + air[c]	-0.0102824	-0.0157365	-0.0102824	-0.0159668	-0.0102824	-0.0160118	-0.0102824	-0.0162411
r0956	saicar[c] <=> fum[c] + aicar[c]	0.0102824	0.0157365	0.0102824	0.0159668	0.0102824	0.0160118	0.0102824	0.0162411
r0957	asuc[c] -> amp[c] + fum[c]	0.0146918	0.0224847	0.0146918	0.0228138	0.0146918	0.0228782	0.0146918	0.0232057
r0958	atp[c] -> h[c] + ppi[c] + camp[c]	0	0	0	0	0	0	0	0
r0959	prpp[c] + xan[c] -> h[c] + ppi[c] + xmp[c]	0	0	0	0	-1.93755e-28	-2.46453e-27	0	0
r0960	prpp[c] + hyxn[c] -> h[c] + ppi[c] + imp[c]	0	0	0	0	0	0	0	0
r0961	prpp[c] + gn[c] -> h[c] + ppi[c] + gmp[c]	1.41616e-24	-2.49253e-29	0	0	0	0	0	0
r0962	atp[c] + adn[c] -> h[c] + amp[c] + adp[c]	0.0371696	0.0568855	0.0371696	0.0577181	0.0371696	0.057881	0.0371696	0.0587095
r0963	h2o[c] + gdp[c] -> 2 h[c] + pi[c] + gmp[c]	0	0	0	0	0	0	0	0
r0964	h2o[c] + utp[c] -> 2 h[c] + ppi[c] + ump[c]	0	0	0	0	0	0	0	0
r0965	atp[c] + dudp[c] <=> adp[c] + dutp[c]	0	0	0	0	0	0	0	0
r0966	atp[c] + h[c] + dump[c] <=> adp[c] + dudp[c]	-0.000619026	-0.000947377	-0.000619026	-0.000961243	-0.000619026	-0.000963956	-0.000619026	-0.000977755
r0967	h2o[c] + dhthy[c] -> h[c] + uibut[c]	0	0	0	0	0	0	0	0
r0968	h2o[c] + h[c] + cyts[c] -> nh3[c] + ura[c]	0	0	0	0	0	0	0	0
r0969	h2o[c] + h[c] + dcmp[c] -> nh3[c] + dump[c]	0	0	0	0	0	0	0	0
r0970	h2o[c] + h[c] + cytd[c] -> nh3[c] + uri[c]	0	0	0	0	0	0	0	0
r0971	h2o[c] + dutp[c] -> 2 h[c] + ppi[c] + dump[c]	0	0	0	0	0	0	0	0
r0972	h2o[c] + h[c] + dc[c] -> nh3[c] + du[c]	0	0	-1.05538e-28	0	0	0	0	0
r0973	atp[c] + udp[c] <=> adp[c] + utp[c]	1000	1000	1000	1000	1000	1000	1000	1000
r0974	atp[c] + cdp[c] <=> adp[c] + ctp[c]	1000	1000	1000	1000	1000	1000	1000	1000
r0975	atp[c] + dcdp[c] <=> adp[c] + dctp[c]	0.000670353	0.00102593	0.000670353	0.00104094	0.000670353	0.00104388	0.000670353	0.00105883
r0976	atp[c] + dtdp[c] <=> adp[c] + dttp[c]	0.000619026	0.000947377	0.000619026	0.000961243	0.000619026	0.000963956	0.000619026	0.000977755
r0977	atp[c] + h[c] + dtmp[c] <=> adp[c] + dtdp[c]	0.000619026	0.000947377	0.000619026	0.000961243	0.000619026	0.000963956	0.000619026	0.000977755
r0978	h2o[c] + gln[c] + atp[c] + utp[c] -> glu[c] + 2 h[c] + pi[c] + adp[c] + ctp[c]	0	0	0.00392257	0	0	0	0	0
r0979	nh3[c] + atp[c] + utp[c] -> 2 h[c] + pi[c] + adp[c] + ctp[c]	0.00392257	0.00600323	0	0.00609109	0.00392257	0.00610829	0.00392257	0.00619572
r0980	h2o[c] + gln[c] + 2 atp[c] + hco3[c] -> glu[c] + 2 h[c] + pi[c] + 2 adp[c] + cap[c]	0.00888878	0.0136037	0.00888878	0.0138028	0.00888878	0.0138417	0.00888878	0.0140399
r0981	rthio[c] + cdp[c] -> h2o[c] + othio[c] + dcdp[c]	0.000670353	0.00102593	0.000670353	0.00104094	0.000670353	0.00104388	0.000670353	0.00105883
r0982	rthio[c] + udp[c] -> h2o[c] + othio[c] + dudp[c]	0.000619026	0.000947377	0.000619026	0.000961243	0.000619026	0.000963956	0.000619026	0.000977755
r0983	nad[m] + doroa[c] -> nadh[m] + h[c] + oroa[c]	0.00888878	0.0136037	0.00888878	0.0138028	0	0.0138417	0.00888878	0.0140399
r0984	o2[c] + doroa[c] -> h2o2[c] + oroa[c]	0	0	0	0	0.00888878	0	0	0
r0985	h[c] + nadph[c] + othio[c] -> nadp[c] + rthio[c]	0.00257876	0.00394661	0.00257876	0.00400437	0.00257876	0.00401568	0.00257876	0.00407316
r0986	metthf[c] + dump[c] <=> dhf[c] + dtmp[c]	0.000619026	0.000947377	0.000619026	0.000961243	0.000619026	0.000963956	0.000619026	0.000977755
r0987	asp[c] + cap[c] -> h[c] + pi[c] + caasp[c]	0.00888878	0.0136037	0.00888878	0.0138028	0.00888878	0.0138417	0.00888878	0.0140399
r0988	pi[c] + du[c] -> dr1p[c] + ura[c]	3.84964e-25	0	-9.16375e-29	-8.38091e-30	0	0	0	0
r0989	pi[c] + dt[c] -> dr1p[c] + thy[c]	0	0	0	0	0	0	0	0
r0990	prpp[c] + oroa[c] <=> h[c] + ppi[c] + omp[c]	0.00888878	0.0136037	0.00888878	0.0138028	0.00888878	0.0138417	0.00888878	0.0140399
r0991	prpp[c] + ura[c] -> h[c] + ppi[c] + ump[c]	3.84953e-25	0	-1.09848e-28	0	0	0	0	0
r0992	adp[c] + udp[c] <=> atp[c] + h[c] + ump[c]	-0.00888878	-0.0136037	-0.00888878	-0.0138028	-0.00888878	-0.0138417	-0.00888878	-0.0140399
r0993	adp[c] + cdp[c] <=> atp[c] + h[c] + cmp[c]	-0.0198197	-0.0303327	-0.0198197	-0.0307767	-0.0198197	-0.0308636	-0.0198197	-0.0313054
r0994	atp[c] + h[c] + dcmp[c] <=> adp[c] + dcdp[c]	0	1.60805e-30	9.01188e-29	8.38092e-30	2.59617e-28	5.22306e-29	-5.19984e-29	-4.35305e-26
r0995	adp[c] + udp[c] <=> h[c] + amp[c] + utp[c]	-999.478	-999.709	-999.81	-999.705	-999.81	-999.704	-999.81	-999.7
r0996	adp[c] + cdp[c] <=> h[c] + amp[c] + ctp[c]	-999.981	-999.971	-999.981	-999.97	-999.981	-999.97	-999.981	-999.97
r0997	h2o[c] + ump[c] -> pi[c] + uri[c]	0	6.74967e-30	0	0	0	0	0	0
r0998	h2o[c] + cmp[c] -> pi[c] + cytd[c]	0	0	0	0	0	0	0	0
r0999	h2o[c] + dcmp[c] -> pi[c] + dc[c]	0	0	-1.05538e-28	-8.38091e-30	0	0	0	0
r1000	h2o[c] + dump[c] -> pi[c] + du[c]	3.84982e-25	0	0	0	0	0	0	0
r1001	h2o[c] + dtmp[c] -> pi[c] + dt[c]	0	0	0	0	0	0	0	0
r1002	h2o[c] + doroa[c] <=> h[c] + caasp[c]	-0.00888878	-0.0136037	-0.00888878	-0.0138028	-0.00888878	-0.0138417	-0.00888878	-0.0140399
r1003	h[c] + omp[c] -> co2[c] + ump[c]	0.00888878	0.0136037	0.00888878	0.0138028	0.00888878	0.0138417	0.00888878	0.0140399
r1004	h2o[m] + 2 atp[m] + hco3[m] + gln[m] -> glu[m] + 2 h[m] + pi[m] + cap[m] + 2 adp[m]	0.0249835	0.0382355	0.0249835	0.0387951	0.0249835	0.0389046	0.0249835	0.0394615
r1005	h2o[c] + nad[c] + aproa[c] -> 2 h[c] + nadh[c] + bala[c]	0	0	0	0	0	0	0	0
r1006	h2o[c] + nad[c] + gabal[c] -> 2 h[c] + nadh[c] + gaba[c]	0	0	0	0	0	0	0	0
r1007	h2o[c] + o2[c] + daprp[c] -> h2o2[c] + nh3[c] + aproa[c]	0	0	0	0	0	0	0	0
r1008	h2o[c] + o2[c] + aspermd[c] -> h2o2[c] + ptrsc[c] + aaproa[c]	0	0	0	0	0	0	0	0
r1009	h2o[c] + o2[c] + spere[c] -> h2o2[c] + sprmd[c] + aproa[c]	0	0	0	0	0	0	0	0
r1010	h2o[c] + sprmd[c] + q[m] -> qh2[m] + gabal[c] + daprp[c]	0	0	0	0	0	0	0	0
r1011	h2o[c] + hcya[c] -> frid[c]	0	0	0	0	0	0	0	0
r1012	glu[c] + atp[c] + cys[c] -> h[c] + pi[c] + adp[c] + gc[c]	0	0	0	0	0	0	0	0
r1013	gly[c] + atp[c] + gc[c] -> h[c] + pi[c] + adp[c] + gsh[c]	0	0	0	0	0	0	0	0
r1014	h2o2[c] + 2 gsh[c] -> 2 h2o[c] + gssg[c]	0	0	0	0	0	0	0	0
r1015	h[c] + nadph[c] + gssg[c] -> nadp[c] + 2 gsh[c]	0	0	0	0	0	0	0	0
r1016	h[c] + nadh[c] + gssg[c] -> nad[c] + 2 gsh[c]	0	0	0	0	0	0	0	0
r1017	h2o[c] + nag6p[c] -> ac[c] + ga6p[c]	0	0	0	0	0	0	0	0
r1018	h2o[m] + nag6p[m] -> ac[m] + ga6p[m]	-1.07197e-17	0	0	0	0	0	0	0
r1019	2 h2o[c] + atp[c] + 5opro[c] -> glu[c] + h[c] + pi[c] + adp[c]	0	0	0	0	0	0	0	0
r1020	o2[c] + 2 cys[c] -> h2o2[c] + cyst[c]	0	0	0	0	0	0	0	0
r1021	h[c] + cyse[c] -> co2[c] + taur[c]	0	0	0	0	0	0	0	0
r1022	o2[c] + akg[c] + 6 h[c] + taur[c] -> 3 h2o[c] + co2[c] + succ[c] + h2s[c] + amiace[c]	0	0	0	0	0	0	0	0
r1023	glu[m] + h[m] -> gaba[m] + co2[m]	0	0	0	0	0	0	0	0
r1024	c141coa[c] + car[c] <=> coa[c] + c141car[c]	0	0	0	0	0	0	0	0
r1025	car[m] + c141coa[m] <=> coa[m] + c141car[m]	0	0	0	0	0	0	0	0
r1026	c120coa[c] + car[c] <=> coa[c] + c120car[c]	0	0	0	0	0	0	0	0
r1027	c140coa[c] + car[c] <=> coa[c] + c140car[c]	0	0	0	0	0	0	0	0
r1028	c160coa[c] + car[c] <=> coa[c] + c160car[c]	0	0	0	0	0	0	0	0
r1029	c161coa[c] + car[c] <=> coa[c] + c161car[c]	0	0	0	0	0	0	0	0
r1030	c162coa[c] + car[c] <=> coa[c] + c162car[c]	0	0	0	0	0	0	0	0
r1031	c180coa[c] + car[c] <=> coa[c] + c180car[c]	0	0	0	0	0	0	0	0
r1032	c181coa[c] + car[c] <=> coa[c] + c181car[c]	0	0	0	0	0	0	0	0
r1033	c182coa[c] + car[c] <=> coa[c] + c182car[c]	0	0	0	0	0	0	0	0
r1034	c183coa[c] + car[c] <=> coa[c] + c183car[c]	0	0	0	0	0	0	0	0
r1035	c120coa[m] + car[m] <=> coa[m] + c120car[m]	0	0	0	0	0	0	0	0
r1036	c140coa[m] + car[m] <=> coa[m] + c140car[m]	0	0	0	0	0	0	0	0
r1037	c160coa[m] + car[m] <=> coa[m] + c160car[m]	0	0	0	0	0	0	0	0
r1038	car[m] + c161coa[m] <=> coa[m] + c161car[m]	0	0	0	0	0	0	0	0
r1039	car[m] + c162coa[m] <=> coa[m] + c162car[m]	0	0	0	0	0	0	0	0
r1040	c180coa[m] + car[m] <=> coa[m] + c180car[m]	0	0	0	0	0	0	0	0
r1041	car[m] + c181coa[m] <=> coa[m] + c181car[m]	0	0	0	0	0	0	0	0
r1042	car[m] + c182coa[m] <=> coa[m] + c182car[m]	0	0	0	0	0	0	0	0
r1043	car[m] + c183coa[m] <=> coa[m] + c183car[m]	0	0	0	0	0	0	0	0
r1044	h2o[c] + udpgal[c] + dmipc[c] -> 2 h[c] + udp[c] + gdmipc[c]	0	0	0	0	0	0	0	0
r1045	h2o[c] + udpgal[c] + gdmipc[c] -> 2 h[c] + udp[c] + dgdmipc[c]	0	0	0	0	0	0	0	0
r1046	udpgal[c] + dgdmipc[c] -> udp[c] + tgdmipc[c]	0	0	0	0	0	0	0	0
r1047	h2o[c] + gdpman[c] -> gdp[c] + man[c]	0	0	0	0	0	0	0	0
r1048	gdpman[c] -> gdp[c] + 14mnan[c]	0	0	0	0	0	0	0	0
r1049	udpnag[c] + pins[c] -> udp[c] + nadgpis[c]	0	0	0	0	0	0	0	0
r1050	h2o[e] + mannan[e] -> man[e]	0	0	0	0	0	0	0	0
r1051	h2o2[m] + 2 h[m] + 2 fero[m] -> 2 h2o[m] + 2 feri[m]	0	0	0	0	0	0	0	0
r1052	dgeod[c] -> geod[c]	0	0	0	0	0	0	0	0
r1053	ichor[c] -> pyr[c] + sali[c]	0	0	0	0	0	0	0	0
r1054	accoa[c] + sam[c] + 8 malcoa[c] -> 6 h2o[c] + 8 co2[c] + 11 nadp[c] + 9 coa[c] + sah[c] + dhmacl[c]	0	3.08419e-14	1.03443e-13	2.94e-14	-2.99064e-15	3.1963e-14	0	0
r1055	o2[c] + dhmacl[c] -> h2o[c] + maclj[c]	0	3.08419e-14	1.03443e-13	2.94e-14	-2.99064e-15	3.1963e-14	0	0
r1056	accoa[c] + malcoa[c] -> mbtac[c]	0	3.08419e-14	1.03443e-13	2.94e-14	-2.99064e-15	3.1963e-14	0	0
r1057	maclj[c] + mbtac[c] -> h2o[c] + lovst[c]	0	3.08419e-14	1.03443e-13	2.94e-14	-2.99064e-15	3.1963e-14	0	0
r1058	ippp[c] + dmpp[c] -> h[c] + ppi[c] + gpp[c]	0	0	0	0	0	0	0	0
r1059	o2[c] + h[c] + nadph[c] + sql[c] -> h2o[c] + nadp[c] + s23e[c]	0	0	0	0	0	0	0	0
r1060	ippp[c] + gpp[c] -> h[c] + ppi[c] + fpp[c]	0	0	0	0	0	0	0	0
r1061	nadph[c] + 2 fpp[c] -> h[c] + 2 ppi[c] + nadp[c] + sql[c]	0	0	0	0	0	0	0	0
r1062	atp[c] + mvl[c] -> h[c] + adp[c] + pmvl[c]	0	0	0	0	0	0	0	0
r1063	2 h[c] + 2 nadph[c] + hmgcoa[c] <=> 2 nadp[c] + coa[c] + mvl[c]	0	0	0	0	0	0	0	0
r1064	atp[c] + h[c] + pmvl[c] -> adp[c] + ppmvl[c]	0	0	0	0	0	0	0	0
r1065	atp[c] + ppmvl[c] -> co2[c] + pi[c] + adp[c] + ippp[c]	0	0	0	0	0	0	0	0
r1066	dmpp[c] <=> ippp[c]	0	0	0	0	0	0	0	0
r1067	s23e[c] -> lnst[c]	0	0	0	0	0	0	0	0
r1068	fpp[c] + ippp[c] -> h[c] + ppi[c] + ggpp[c]	0	0	0	0	0	0	0	0
r1069	h[c] + coa[c] + hmgcoa[c] <=> h2o[c] + accoa[c] + aaccoa[c]	0	0	0	0	0	0	0	0
r1070	h[c] + nadph[c] + vera[c] -> nadp[c] + dmst[c]	0	0	0	0	0	0	0	0
r1071	o2[c] + accoa[c] + 9 malcoa[c] -> nor[c]	0	0	0	0	0	0	0	0
r1072	h2o[c] + vha[c] -> 2 h[c] + ac[c] + vhoh[c]	0	0	0	0	0	0	0	0
r1073	o2[c] + btol[c] -> 2 h[c] + 2mac[c]	0	0	0	0	0	0	0	0
r1074	o2[c] + h[c] + nadph[c] + avn[c] -> h2o[c] + nadp[c] + havn[c]	0	0	0	0	0	0	0	0
r1075	2 o2[c] + 2 h[c] + 2 nadph[c] + omst[c] -> h2o[c] + co2[c] + 2 nadp[c] + meth[c] + afb1[c]	0	0	0	0	0	0	0	0
r1076	o2[c] + 3 h[c] + nadph[c] + omst[c] -> nadp[c] + eth[c] + afg1[c]	0	0	0	0	0	0	0	0
r1077	o2[c] + 3 h[c] + nadph[c] + dhomst[c] -> h2o[c] + nadp[c] + afb2[c]	0	0	0	0	0	0	0	0
r1078	o2[c] + 3 h[c] + nadph[c] + dhomst[c] -> h2o[c] + nadp[c] + afg2[c]	0	0	0	0	0	0	0	0
r1079	h[c] + nadph[c] + verb[c] -> h2o[c] + nadp[c] + dhdmst[c]	0	0	0	0	0	0	0	0
r1080	2 h[c] + nadph[c] + nor[c] -> nadp[c] + avn[c]	0	0	0	0	0	0	0	0
r1081	sam[c] + dmst[c] -> h[c] + sah[c] + st[c]	0	0	0	0	0	0	0	0
r1082	sam[c] + dhdmst[c] -> h[c] + sah[c] + dhst[c]	0	0	0	0	0	0	0	0
r1083	2 h2o[c] + bn[c] <=> nh3[c] + ba[c]	0	0	0	0	0	0	0	0
r1084	h[c] + bfor[c] -> co2[c] + bal[c]	0	0	0	0	0	0	0	0
r1085	coac[e] <=> cmuc[e]	0	0	0	0	0	0	0	0
r1086	o2[c] + ccl[c] -> muc[c]	0	0	0	0	0	0	0	0
r1087	o2[c] + h[c] + nadph[c] + 3hba[c] -> h2o[c] + nadp[c] + pcace[c]	0	0	0	0	0	0	0	0
r1088	h[c] + nadph[c] + 2mac[c] -> nadp[c] + 3oa[c]	0	0	0	0	0	0	0	0
r1089	coa[m] + 3oacoa[m] <=> accoa[m] + succoa[m]	0	0	0	0	0	0	0	0
r1090	succoa[m] + 3oa[m] <=> succ[m] + 3oacoa[m]	0	0	0	0	0	0	0	0
r1091	h[c] + dhba[c] -> co2[c] + ccl[c]	0	0	0	0	0	0	0	0
r1092	o2[m] + h[m] + nadph[m] + ba[m] -> h2o[m] + nadp[m] + 4hba[m]	0	0	0	0	0	0	0	0
r1093	h2o[c] + co2[c] + nadp[c] + ccl[c] <=> o2[c] + 2 h[c] + nadph[c] + sali[c]	0	0	0	0	0	0	0	0
r1094	o2[m] + h[m] + nadh[m] + hphea[m] -> h2o[m] + nad[m] + homogen[m]	0	0	0	0	0	0	0	0
